# Supplementary material for: Untargeted Metabolomics Reveals Multiple Phytometabolites in the Agricultural Waste Materials and Medicinal Materials of Codonopsis pilosula
Source: Front Plant Sci. 2022 Jan 10;12:814011. doi: 10.3389/fpls.2021.814011 (PMC8784785; doi:10.3389/fpls.2021.814011)
Supplement: Supplementary file 4 [file Table_1.xlsx]

## Sheet: Table S1
Table S1 Overview of metabolomics data
Metab ID	Mode	M/Z	VIP_OPLS-DA	Fold_Change (JY/CK)	P_value	FDR	JY1	JY2	JY3	JY4	JY5	JY6	CK1	CK2	CK3	CK4	CK5	CK6
metab_0	pos_1	414.212	0.9554	0.9165	0	0.0001	7.5902	7.3851	7.201	7.3659	7.4033	7.5576	7.8416	8.1963	8.0341	8.0793	8.3288	8.0751
metab_1	pos_2	342.139	0.8114	0.9126	0.0137	0.0226	7.1474	6.5348	7.6096	6.9655	7.4259	6.5645	7.4843	7.5911	8.3888	7.6231	7.5752	7.6277
metab_2	pos_3	499.288	1.0986	0.8721	0.0006	0.0015	6.5903	6.9332	6.0244	6.8683	6.6128	6.8861	7.6135	7.6578	7.2259	7.2628	8.0676	7.9488
metab_3	pos_4	245.138	1.5665	1.3388	0	0	6.621	7.128	7.5323	6.8134	6.8928	6.8643	4.8537	5.3846	5.5897	4.9705	5.5516	4.9127
metab_4	pos_5	387.18	0.1011	0.9958	0.5209	0.5704	8.2317	8.0451	8.373	8.3124	8.3259	8.2557	8.2736	8.3252	8.2716	8.2076	8.3004	8.3749
metab_5	pos_6	415.211	0.1179	1.0059	0.4945	0.5451	8.4921	8.2779	8.6126	8.5374	8.6465	8.7275	8.4435	8.5013	8.5214	8.5305	8.3882	8.6074
metab_6	pos_7	581.22	1.5413	0.7687	0	0.0001	6.484	5.4202	6.58	5.7759	6.1655	5.3052	7.3803	7.9438	7.6906	7.804	7.9868	7.679
metab_7	pos_8	383.094	0.0067	0.9946	0.9509	0.9595	5.2013	4.5614	7.4685	5.447	4.5988	4.5024	5.5188	5.109	5.5157	5.3578	5.3701	5.0854
metab_8	pos_9	349.089	0.5334	1.0596	0.117	0.1508	7.4333	7.0051	6.8544	7.1013	7.0443	7.123	7.0041	7.246	6.2586	6.2361	7.2762	6.1481
metab_9	pos_10	414.233	0.8303	0.8967	0.0253	0.0386	7.2919	6.2742	6.6424	6.6626	6.6292	6.217	7.1743	7.7231	7.5892	8.2765	6.9158	6.6208
metab_10	pos_11	345.133	1.287	1.2528	0.0002	0.0005	5.9933	5.9242	7.0315	6.2433	5.9069	6.6294	4.8739	5.5249	5.0257	4.798	5.1178	4.7756
metab_11	pos_12	393.261	0.5524	0.9543	0.0182	0.0289	6.5802	6.8141	6.9611	6.8244	6.8998	6.8814	7.295	7.125	6.9367	7.006	7.5921	6.9682
metab_12	pos_13	277.216	0.7559	1.0573	0.0001	0.0003	8.147	8.0851	8.3322	7.9709	7.9424	8.0086	7.5147	7.684	7.668	7.7175	7.5642	7.7102
metab_13	pos_14	405.262	0.8518	1.0906	0	0.0001	6.5128	6.5956	6.3223	6.6194	6.5562	6.7587	5.8656	6.0846	6.0259	6.0447	6.0991	5.9738
metab_15	pos_16	640.345	1.854	0.6865	0	0	4.9728	5.5978	6.0576	5.4621	5.4283	5.0448	7.8751	7.5988	7.9796	7.5721	8.2544	8.1516
metab_16	pos_17	279.231	0.9033	0.9209	0.0001	0.0002	7.3465	7.145	6.9405	7.2259	7.1656	7.1577	7.7905	7.7465	7.5864	7.5835	8.0615	7.9064
metab_17	pos_18	405.263	0.028	1.0014	0.9595	0.9668	6.2201	6.5326	6.3425	6.3988	6.3195	6.302	6.3303	6.8748	5.7081	6.3575	6.5378	6.2564
metab_18	pos_19	277.216	0.0978	1.005	0.567	0.615	7.4323	7.5001	7.4339	7.4148	7.4295	7.402	7.3721	7.4096	7.1965	7.3273	7.6576	7.4246
metab_19	pos_20	501.319	1.2631	1.2002	0	0	6.8023	7.0132	6.5818	6.917	6.6932	6.8948	5.4565	5.7609	5.755	5.6618	5.8715	5.5749
metab_20	pos_21	475.121	0.1822	0.9822	0.5586	0.6065	7.3019	6.8479	6.5892	6.9612	6.9756	7.1266	7.3888	7.4952	6.7114	6.7247	7.6026	6.634
metab_21	pos_22	427.266	0.7065	0.9271	0.0118	0.0199	6.3117	6.6361	7.1542	6.5151	6.5585	6.6609	7.0109	7.6271	6.7012	7.2827	7.2092	7.1321
metab_22	pos_23	355.102	0.7676	1.117	0.0494	0.07	6.8075	6.5293	6.6969	7.6108	8.299	7.2341	6.1575	6.2858	5.9803	7.0108	6.1195	7.1004
metab_23	pos_24	289.164	1.3977	1.2795	0	0	6.2548	6.4223	6.5686	6.3776	6.3519	6.2103	4.8326	5.3321	4.6191	4.8418	5.2001	5.0184
metab_24	pos_25	328.139	1.1563	0.8832	0	0.0001	7.4289	7.1619	7.654	7.3911	7.7052	7.2558	8.6537	8.1313	8.335	8.3255	8.4104	8.6378
metab_25	pos_26	215.016	0.831	0.898	0.0186	0.0294	5.8358	5.8376	7.2479	6.2978	6.4832	6.761	7.1881	7.0426	6.7395	7.6601	6.9091	7.2947
metab_26	pos_27	113.964	0.5512	1.0324	0	0.0001	7.1161	7.2447	7.1742	7.2349	7.1138	7.2821	6.9721	6.9965	6.9455	6.9312	6.9664	6.9938
metab_27	pos_28	146.03	0.6308	1.0426	0	0	6.9705	7.1138	7.1124	7.0339	6.9547	7.0919	6.7883	6.752	6.7522	6.7992	6.7061	6.7489
metab_28	pos_29	86.9931	0.6916	1.0499	0	0	7.1463	7.2942	7.314	7.1959	7.1717	7.2954	6.933	6.8545	6.9098	6.9345	6.8554	6.8654
metab_29	pos_30	84.9601	0.6669	1.0486	0.0001	0.0002	7.1486	7.4089	7.1908	7.3348	7.1646	7.2789	6.9365	6.9179	6.8885	6.8182	7.0139	6.9329
metab_30	pos_31	155.974	0.4914	1.0322	0.0001	0.0003	5.8883	5.9894	5.9196	5.982	5.8445	6.0036	5.7272	5.7748	5.7605	5.7106	5.7577	5.7898
metab_31	pos_32	218.983	0.719	1.05	0	0.0001	7.8634	8.0279	8.0776	7.9157	7.8736	8.0036	7.6486	7.5189	7.5951	7.6731	7.5264	7.5258
metab_32	pos_33	216.95	0.7792	1.0682	0.0001	0.0005	7.2346	7.5779	7.3666	7.4293	7.1635	7.2018	6.9588	6.7327	6.8734	6.7601	7.0138	6.8272
metab_33	pos_34	188.091	0.166	0.9877	0.4451	0.4973	6.3587	6.4711	6.3742	6.4723	6.546	6.3285	6.1864	6.7479	6.253	6.6614	6.6294	6.5507
metab_34	pos_35	320.866	0.7756	1.0716	0	0.0002	6.7838	7.0694	6.9782	6.7993	6.8614	6.7926	6.3592	6.364	6.3042	6.6376	6.4292	6.4345
metab_35	pos_36	122.924	0.426	1.0263	0.0069	0.0124	6.756	6.7876	6.8395	6.7384	6.8138	6.5679	6.5714	6.5311	6.4518	6.6763	6.6248	6.6118
metab_36	pos_37	212.851	0.7763	0.9152	0.0064	0.0116	6.3223	5.5585	6.2867	5.904	6.4016	5.7214	6.7808	6.3258	6.811	6.4881	6.6119	6.5257
metab_37	pos_38	235.056	0.2169	1.0215	0.4617	0.5138	5.7124	5.8828	5.7935	6.1775	5.3504	6.1897	5.611	5.9617	5.8887	5.4331	5.5159	5.9579
metab_38	pos_39	290.847	0.3405	1.022	0.0657	0.0901	6.924	7.0222	6.9708	6.9626	7.1434	6.7509	6.7444	6.7871	6.6232	6.9845	6.8712	6.8607
metab_39	pos_40	383.131	0.0585	1.009	0.9236	0.9364	6.8944	5.1578	5.9904	6.0238	5.1487	3.6699	4.48	5.6517	5.8149	5.2527	5.9247	5.4675
metab_40	pos_41	268.154	0.4293	0.9774	0.0247	0.0378	8.6937	8.5651	8.4898	8.5425	8.5575	8.5059	8.9194	8.7457	8.7161	8.9851	8.5337	8.6437
metab_41	pos_42	367.149	1.1929	0.8598	0.0003	0.0008	6.8992	6.4749	7.4921	6.854	7.502	6.5389	8.2739	7.8122	8.2637	8.2298	7.7843	8.2035
metab_42	pos_43	205.097	0.071	1.0056	0.7989	0.8287	7.4227	7.5427	7.4653	7.5563	7.2703	7.7057	7.6225	7.1569	8.0425	7.3425	7.0466	7.5036
metab_43	pos_44	436.144	0.3922	1.1048	0.5281	0.5771	4.5551	3.5348	7.3398	4.3764	3.4665	3.4759	3.3231	4.4459	4.712	3.507	4.2453	3.9753
metab_44	pos_45	435.162	0.927	1.1711	0.0238	0.0366	7.1205	5.7604	6.1527	6.3747	5.6672	5.4306	4.6394	6.0226	5.4197	5.1737	5.3581	4.5544
metab_45	pos_46	435.162	0.5323	1.0579	0.0748	0.101	7.4741	6.4573	6.6717	6.9306	7.0196	6.3388	6.2082	6.671	6.4631	6.5476	6.5619	6.2019
metab_46	pos_47	317.12	0.2626	0.9667	0.4229	0.4755	6.2305	5.7727	6.4681	5.9322	6.0331	5.6222	5.9516	6.2147	6.4403	7.0857	6.0838	5.5253
metab_47	pos_48	393.154	1.2038	1.1939	0	0.0001	6.5808	6.8373	6.3258	6.8179	6.631	6.4578	5.5067	5.9252	5.5686	5.1168	5.7615	5.3283
metab_48	pos_49	444.243	1.6761	0.7074	0.0002	0.0005	5.9548	5.6838	5.7376	5.3786	5.9999	3.7027	7.4299	8.161	7.2802	7.9704	7.6662	7.383
metab_49	pos_50	421.183	0.354	1.0431	0.3239	0.3748	6.788	6.1763	6.297	6.2504	6.0653	5.9104	5.2085	6.6442	6.1144	6.1455	6.3095	5.5207
metab_50	pos_51	579.22	0.4076	0.956	0.2244	0.2697	6.2296	6.6996	5.8552	6.9046	7.3488	6.5827	6.8124	7.3356	6.9938	6.6176	6.8404	6.8419
metab_51	pos_52	385.164	1.0968	0.8636	0.0005	0.0012	6.3043	6.1434	5.3066	6.1987	6.534	5.7783	6.8397	6.9677	7.1666	6.8962	6.9747	7.1506
metab_52	pos_53	227.127	0.8579	1.1004	0.0003	0.0009	6.216	6.3801	6.4029	6.2818	6.2159	6.3207	5.7635	5.8443	6.0271	5.3939	5.8867	5.45
metab_53	pos_54	295.226	0.2296	0.9856	0.2354	0.2811	7.3343	7.1562	7.3565	7.169	7.075	7.1242	7.1002	7.5871	7.1668	7.3111	7.3443	7.3397
metab_54	pos_55	407.24	0.7084	1.0722	0.0079	0.014	6.5334	6.9624	7.184	6.7468	6.7084	6.9192	6.252	6.7243	6.0014	6.5602	6.4581	6.29
metab_55	pos_56	291.195	1.0483	1.1132	0	0	7.7248	7.6235	7.7672	7.6163	7.5694	7.5963	6.6765	6.9851	6.8768	6.9449	6.8631	6.8864
metab_56	pos_57	399.238	1.0309	1.1578	0.0007	0.0017	5.8764	6.3741	6.9006	6.2077	6.3246	6.3523	5.2666	5.2365	5.5313	5.8841	5.724	5.2097
metab_57	pos_58	647.374	2.2161	2.1906	0	0.0001	6.6074	6.5084	7.2127	6.7543	5.8155	6.7417	2.3787	4.5604	2.3357	3.9873	2.4522	2.3796
metab_58	pos_59	521.217	0.2583	0.9619	0.421	0.4734	5.1176	5.8342	5.7673	5.5955	6.3155	5.0062	5.8369	6.4893	6.0995	5.4715	5.7747	5.2973
metab_59	pos_60	331.117	1.2827	1.2055	0	0	6.6854	6.8839	7.1713	6.9393	6.7664	6.9196	5.7927	6.1714	5.4702	5.5617	5.7079	5.6089
metab_60	pos_61	515.282	1.1904	0.8503	0	0.0001	6.0568	6.1625	6.2895	6.0515	6.1579	5.9916	7.0292	7.6257	6.6465	7.1225	7.2889	7.4577
metab_61	pos_62	475.121	0.0835	1.0078	0.8071	0.8359	7.3967	7.0429	6.816	7.0996	7.087	7.2714	7.389	7.4592	6.5726	6.6665	7.6865	6.6083
metab_62	pos_63	341.156	1.1065	1.1745	0.0002	0.0005	5.922	6.4288	6.8304	6.1336	6.2496	6.1176	5.1532	5.6513	5.311	5.2582	5.5984	5.1108
metab_63	pos_64	289.091	0.1993	0.9801	0.5143	0.5641	7.0027	6.5046	6.2965	6.6212	6.6474	6.7529	7.0398	7.1732	6.4168	6.4202	7.2577	6.3279
metab_64	pos_65	357.094	2.0453	2.0892	0	0	5.0421	5.7453	5.8004	5.6489	5.5707	5.637	2.6448	2.7523	2.6017	2.6462	2.7184	2.6457
metab_65	pos_66	199.112	0.8904	0.9199	0.0001	0.0003	7.1674	6.8973	6.8034	6.8462	6.9161	6.9925	7.2708	7.6551	7.4731	7.5504	7.824	7.4739
metab_66	pos_67	147.08	0.102	1.007	0.6319	0.6746	5.568	5.7375	5.5576	5.6332	5.4592	5.6047	5.3108	5.6814	5.5113	5.546	5.806	5.4685
metab_67	pos_68	268.085	1.118	1.1701	0	0.0001	6.1594	6.5898	6.2781	6.5433	6.2859	6.6012	5.3676	5.5348	5.3386	5.2234	5.6234	5.7798
metab_68	pos_69	441.245	0.3994	1.0316	0.1036	0.1353	7.5941	6.981	7.5677	7.2454	7.2892	6.9613	6.9877	6.929	7.2957	6.976	7.1206	6.9898
metab_69	pos_70	493.131	1.0251	1.2	0.0166	0.0267	7.0793	5.5342	5.9946	6.9653	7.7592	6.4179	5.7614	5.7264	5.9692	5.8523	4.7731	5.0424
metab_70	pos_71	543.241	0.6276	0.9079	0.0998	0.131	6.4162	5.4385	6.0022	5.5369	5.5432	5.1967	6.2128	6.2312	7.1795	6.2912	6.4958	5.1852
metab_71	pos_72	530.244	0.9109	0.8773	0.0118	0.0199	5.7925	6.3151	5.5793	6.2648	6.4809	5.5658	6.1451	7.3471	6.5708	7.526	6.9674	6.4773
metab_72	pos_73	581.22	1.2573	0.8335	0	0.0001	5.7636	6.0047	6.3372	6.1449	5.9813	6.1621	6.7715	7.495	6.8829	7.4723	7.7125	7.3325
metab_73	pos_74	252.054	1.3394	1.3893	0.0037	0.0072	4.8725	5.1831	6.867	5.5427	5.3322	5.3261	3.2468	5.2218	4.1991	3.2693	3.92	3.9891
metab_74	pos_75	428.139	1.2401	0.7645	0.0022	0.0046	4.5462	4.7717	4.0717	4.6787	4.6898	3.8943	4.9988	6.6018	5.4288	6.8296	5.6014	5.3986
metab_75	pos_76	313.198	0.5814	1.0853	0.1326	0.1685	6.0152	5.9174	6.968	5.8082	5.6844	5.3236	5.7356	5.7456	4.7798	5.716	5.8161	5.115
metab_76	pos_77	696.27	1.8355	0.7115	0	0	6.6179	5.7281	5.0141	5.9809	6.4102	5.8379	8.2922	8.04	8.4674	8.4006	8.5068	8.3081
metab_77	pos_78	370.17	0.9376	1.1484	0.0092	0.016	6.8329	6.1959	6.6	6.363	6.1789	6.1815	5.3432	6.1279	5.7604	4.8472	6.2391	5.0776
metab_78	pos_79	439.157	0.6273	1.0721	0.0568	0.0792	7.0221	6.4188	7.2996	6.7534	7.0968	6.3419	6.4702	6.8833	6.4001	5.8389	6.4583	6.1282
metab_79	pos_80	395.131	1.2297	0.8376	0	0	6.1198	5.6155	6.2302	5.7269	5.6412	5.583	6.973	7.0826	6.8376	7.0356	7.0072	6.7432
metab_80	pos_81	606.239	0.968	1.1841	0.0231	0.0357	7.8259	6.0829	6.7637	7.0087	5.9487	5.6152	5.7424	4.818	5.4316	5.3727	6.1579	5.6184
metab_81	pos_82	364.087	1.5861	0.7251	0.0008	0.0019	6.5767	5.1288	3.6793	5.8024	5.452	5.9549	7.7686	7.6572	7.5421	7.2601	7.8989	6.8215
metab_83	pos_84	166.086	0.7523	1.0716	0.0064	0.0116	7.9541	8.2781	7.7848	8.2711	7.9893	8.4247	7.7826	7.2727	7.9492	7.2113	7.4731	7.7596
metab_85	pos_86	271.081	0.8855	0.8631	0.0207	0.0323	5.3941	4.2584	6.1319	5.3148	5.9715	4.6249	6.1202	6.0402	6.3551	5.9162	6.1988	6.0947
metab_86	pos_87	262.128	0.8979	0.9203	0.0007	0.0017	7.762	7.2578	7.9536	7.5868	8.0166	7.3094	8.4014	8.289	8.2151	8.3292	8.1979	8.4291
metab_87	pos_88	265.139	1.256	1.2173	0.0001	0.0004	6.5573	6.5567	6.7172	6.8845	6.8606	7.0221	6.1338	5.7788	5.9151	5.3363	5.129	5.0561
metab_88	pos_89	137.046	1.4438	1.305	0.0004	0.001	7.3239	7.6893	6.3159	7.4493	6.5999	7.5005	4.9858	6.5574	5.3351	5.2338	5.3156	5.4296
metab_89	pos_90	289.091	0.9365	0.8771	0.0117	0.0197	6.1564	5.8484	7.2971	6.4422	7.0839	5.5038	7.1754	7.3905	7.4041	7.0547	7.2863	7.3943
metab_90	pos_92	255.097	0.3775	0.9714	0.0973	0.128	6.5691	6.3366	6.5362	6.4568	6.6083	6.639	6.9417	6.4269	6.9208	6.8809	6.6566	6.47
metab_91	pos_93	264.107	0.3458	0.9637	0.2846	0.3339	6.6472	6.2462	7.6884	6.6837	7.0853	6.3697	6.9315	7.0924	6.9764	7.0444	6.8657	7.3482
metab_92	pos_94	117.074	0.8979	0.9093	0	0.0002	5.9064	6.0443	6.155	6.1061	6.2838	6.2496	6.7616	6.7683	6.5819	6.4996	6.8918	6.9064
metab_93	pos_95	203.052	0.5127	1.0372	0.0064	0.0116	7.0437	6.8601	6.97	7.0834	7.1045	6.8875	6.5486	6.9195	6.6404	6.7164	6.7208	6.9033
metab_94	pos_96	504.192	1.4348	0.7419	0.0021	0.0044	5.3597	4.5812	7.0937	4.8432	5.5019	4.2545	6.9013	6.765	7.932	7.0432	6.9131	7.0792
metab_97	pos_99	339.154	0.99	0.8779	0.0058	0.0107	6.8046	6.0876	6.3591	6.4923	6.823	6.4386	7.9928	7.0914	7.0888	6.9742	8.2642	7.0167
metab_98	pos_100	353.268	0.4479	1.0405	0.1339	0.1698	6.8855	7.051	7.6367	6.907	6.8871	6.9958	6.6746	7.2837	6.4061	6.892	6.7919	6.6673
metab_99	pos_101	478.292	0.8605	0.914	0.002	0.0043	6.9787	6.9483	7.2274	7.0175	6.8375	6.8964	7.7255	7.464	8.0644	7.0117	7.857	7.7216
metab_101	pos_103	563.355	1.2002	1.1908	0.0002	0.0005	6.768	6.9259	7.4798	6.7413	6.9629	6.7274	5.1994	6.2585	5.9398	5.8984	6.034	5.6069
metab_102	pos_104	441.299	1.1705	1.2211	0.0011	0.0026	6.4811	6.8265	5.5244	6.769	6.3899	6.6428	4.7535	5.8413	4.8467	5.3721	5.5429	5.2795
metab_103	pos_105	331.188	1.1898	1.1726	0	0	6.873	6.7273	6.7998	6.8676	6.5945	6.7906	5.5949	5.8247	5.8269	5.9256	5.7472	5.7485
metab_104	pos_106	277.179	1.5076	1.2952	0	0	7.0512	7.0197	6.9088	6.9269	6.8954	6.9273	5.3668	5.6741	5.3359	5.2296	5.4504	5.1617
metab_106	pos_108	681.397	1.4716	0.7753	0	0.0001	6.1632	5.9189	5.4826	5.0833	5.496	5.0965	6.8706	7.2992	6.899	7.0665	7.5262	7.2122
metab_107	pos_109	490.337	0.3907	0.947	0.3394	0.3905	5.6146	6.1273	5.1371	6.1889	6.6773	6.241	6.7966	6.6393	5.3315	7.0286	6.1815	6.0274
metab_108	pos_110	369.263	0.0155	0.9974	0.909	0.9242	6.1585	6.5446	6.6665	6.3475	6.3078	6.4462	6.531	6.6393	5.8827	6.5396	6.726	6.2557
metab_109	pos_111	347.183	1.3035	1.203	0	0	6.9893	7.1103	7.045	7.0478	6.9542	7.096	5.6698	6.1299	5.8035	5.8658	5.8474	5.7961
metab_110	pos_112	228.196	0.0623	0.9973	0.7107	0.7469	7.3359	7.3066	7.3917	7.4669	7.3715	7.6348	7.438	7.4465	7.3888	7.4039	7.4352	7.5139
metab_111	pos_113	441.336	1.2513	1.1683	0	0	7.7953	8.0967	7.4294	7.8605	7.8701	7.8164	6.6232	6.7678	6.659	6.7066	6.7105	6.6492
metab_114	pos_116	523.36	1.4689	1.251	0	0	7.4087	7.8441	7.9605	7.563	7.9519	7.7135	5.8328	6.0978	6.4122	6.1406	6.5797	6.0573
metab_115	pos_117	497.36	1.2585	1.2015	0.0002	0.0005	7.5634	7.8182	6.7025	7.6164	7.0064	7.5133	5.9564	6.7235	6.1338	6.0967	5.9868	5.9041
metab_116	pos_118	463.281	1.1499	1.1837	0.0004	0.0011	7.2507	7.2747	6.5403	7.1542	6.8708	6.9803	5.5181	5.8116	6.3147	5.3605	6.4228	6.1164
metab_117	pos_119	665.495	1.1544	1.1544	0	0.0002	7.3695	7.8077	7.7264	7.3937	7.6574	7.321	6.0309	6.8109	6.3934	6.5819	6.7565	6.6472
metab_118	pos_120	539.37	2.1804	1.9585	0	0.0001	7.5045	7.7257	6.42	7.6017	6.9321	7.4214	4.3023	4.6533	2.2195	4.2334	4.3977	2.4593
metab_119	pos_121	85.0764	0.2221	1.0115	0.1503	0.1881	6.5962	6.6667	6.7114	6.7158	6.5735	6.7935	6.5163	6.6175	6.605	6.481	6.6795	6.7011
metab_120	pos_122	425.377	0.016	0.9965	0.8633	0.885	6.9292	7.2762	7.0839	7.1223	7.0077	7.076	7.1087	7.6693	7.2478	7.0279	6.9249	6.6706
metab_122	pos_124	671.461	0.7297	1.1377	0.1439	0.181	6.2654	5.8443	8.3907	5.6992	5.6747	5.4479	5.0964	6.0883	5.4453	5.0794	5.7169	5.3786
metab_123	pos_125	423.361	0.3714	1.0321	0.2316	0.2772	7.2217	7.5129	7.1673	7.3045	7.1801	7.1884	6.862	7.8721	6.8232	6.9457	6.9323	6.7835
metab_124	pos_126	118.943	0.5588	1.0413	0	0.0001	5.7435	5.8507	5.7879	5.8591	5.7588	5.9097	5.5722	5.6061	5.5852	5.5453	5.598	5.6165
metab_125	pos_127	161.969	0.5669	1.0372	0	0.0001	6.5168	6.6705	6.5952	6.6375	6.5368	6.688	6.3794	6.4121	6.3304	6.3423	6.3699	6.3829
metab_126	pos_128	180.99	0.5528	1.0378	0	0.0001	6.1583	6.3021	6.2141	6.2775	6.1463	6.2946	6.0262	6.038	5.9746	5.9788	5.9921	6.0232
metab_127	pos_129	271.916	0.5712	1.0448	0	0.0002	5.6739	5.805	5.701	5.8019	5.7006	5.8717	5.5645	5.5286	5.5107	5.4415	5.5175	5.5093
metab_129	pos_131	149.94	0.5601	1.0407	0	0.0001	5.8894	5.9826	5.9407	6.0137	5.8902	6.0591	5.7475	5.7622	5.7072	5.7011	5.7188	5.7457
metab_130	pos_132	132.998	0.689	1.0516	0	0	6.861	7.0224	7.0518	6.9356	6.9058	7.0398	6.6566	6.5985	6.6406	6.6721	6.5902	6.6022
metab_132	pos_134	534.699	0.839	1.1595	0.0264	0.04	5.71	5.7072	6.3101	4.8816	5.5797	4.6177	5.2925	4.4227	4.7036	4.854	4.7081	4.3158
metab_133	pos_135	280.818	1.0857	1.2469	0.0094	0.0162	5.7969	5.8746	6.7102	5.1568	5.5924	4.7147	5.2214	4.0117	4.6412	4.816	4.6106	3.8446
metab_134	pos_136	349.007	1.5815	0.6944	0	0	3.8066	3.8392	3.7489	4.2614	4.2809	4.5219	5.9254	5.8667	6.1867	5.5883	5.7991	5.8511
metab_135	pos_137	463.098	1.6906	0.6694	0	0	3.9502	3.9829	4.0117	3.9887	3.9145	4.8456	6.2152	6.2285	6.1381	5.905	6.1133	6.2918
metab_136	pos_138	464.736	0.6169	0.9202	0.0362	0.0531	4.4573	5.0853	5.2495	5.063	5.263	5.1036	5.7704	4.8708	5.6447	5.5288	5.6782	5.351
metab_137	pos_139	276.871	1.078	1.2187	0.001	0.0023	6.0795	5.459	5.2017	5.6921	5.305	5.2686	4.0649	5.047	4.0746	4.4547	4.5599	4.8834
metab_138	pos_140	342.139	0.624	0.93	0.1038	0.1356	6.7814	6.243	7.7905	7.6464	8.3295	7.3617	7.7208	8.0828	7.8639	7.8764	8.0615	7.8755
metab_139	pos_141	504.192	0.8335	0.8877	0.0338	0.0498	5.9264	5.2736	7.2698	6.4282	7.1579	5.9392	6.9493	7.0641	7.4477	7.0116	7.2697	7.0598
metab_140	pos_142	248.113	0.8112	0.9092	0.0185	0.0292	6.7867	6.6138	7.8971	7.042	7.6162	6.7853	8.0954	8.1725	7.3381	8.0999	7.5734	7.7221
metab_141	pos_143	304.16	0.9578	1.1474	0.002	0.0043	6.0245	6.2263	6.499	6.084	5.8775	5.961	5.2103	5.3913	5.7595	4.607	5.3353	5.6563
metab_142	pos_144	173.092	1.313	1.2384	0	0	6.3837	6.5711	6.0236	6.509	6.3333	6.6706	5.17	5.349	5.1551	5.1989	5.1427	5.0625
metab_143	pos_145	440.175	0.6186	0.9428	0.0123	0.0205	6.0187	6.3545	5.7038	6.2264	6.1596	6.2991	6.3995	6.4206	6.6848	6.2235	6.6053	6.6614
metab_144	pos_146	335.094	1.7183	1.5838	0	0	5.7208	5.8435	5.1949	5.7009	5.5756	5.8892	3.547	3.6547	3.5038	3.5484	3.6207	3.5478
metab_145	pos_147	365.166	0.1129	1.0105	0.6506	0.692	6.1279	6.3136	5.8024	6.0919	5.8332	6.166	6.136	6.2542	5.5601	5.9423	5.8442	6.2187
metab_147	pos_149	666.244	0.9332	0.85	0.025	0.0382	5.5595	4.7295	7.1274	5.2565	5.4361	5.205	6.3492	6.423	7.3068	6.2096	6.4931	6.409
metab_148	pos_150	472.201	1.3439	0.7344	0.002	0.0042	5.1133	4.0359	3.9456	4.0418	4.6204	3.977	5.3913	5.683	6.9594	4.8053	6.5236	5.6788
metab_149	pos_151	486.181	0.792	0.8984	0.0441	0.0633	5.8711	5.679	6.3803	6.8341	7.6214	6.2769	6.95	7.3307	6.6225	7.4364	7.4413	7.2573
metab_150	pos_152	522.202	0.4973	0.9496	0.1053	0.1374	7.1047	6.5701	7.7548	6.8656	6.8993	6.3757	7.2634	7.3326	7.4034	7.0062	7.3139	7.4541
metab_151	pos_153	304.102	0.9863	1.1874	0.0047	0.0089	6.0052	5.1209	6.187	5.7114	6.1003	4.9284	4.495	5.0422	4.4518	4.6168	5.0669	5.0091
metab_152	pos_154	286.092	0.523	1.0983	0.2513	0.2983	6.1302	4.8312	6.7317	5.922	6.6113	4.8404	5.3085	5.6967	4.0861	5.8845	5.5745	5.3748
metab_153	pos_155	126.055	0.8696	1.0987	0.0001	0.0005	6.4421	6.4079	6.5794	6.5411	6.9127	6.4611	6.0844	6.1994	5.7758	5.9795	5.9402	5.8263
metab_154	pos_156	309.165	1.5375	1.3549	0	0	6.1037	6.4706	6.3428	6.6106	6.7401	6.7363	4.5826	4.9011	4.5394	5.1105	4.6564	4.9974
metab_155	pos_157	191.039	0.4134	0.9654	0.0594	0.0824	6.1696	5.946	6.5862	6.1821	6.197	6.0992	6.2909	6.6375	6.2826	6.3726	6.3849	6.5428
metab_156	pos_158	262.128	0.9236	0.9139	0.0009	0.0021	7.611	7.0582	7.8699	7.4663	7.9786	7.2265	8.3513	8.2544	8.1316	8.2889	8.115	8.3305
metab_157	pos_159	387.039	1.0128	0.8521	0.0103	0.0176	6.095	4.5855	6.9308	6.0026	6.2264	5.5248	6.8936	7.0374	6.9471	6.6813	6.9735	6.9689
metab_158	pos_160	515.091	0.9665	0.8583	0.0174	0.0278	5.266	5.2987	7.2078	5.7565	6.5795	5.6651	7.1866	6.3313	7.2873	6.8141	7.1257	6.9311
metab_159	pos_161	306.997	0.6421	0.8803	0.2378	0.2836	4.176	4.0969	6.6342	5.5877	6.522	5.8635	6.7651	4.3315	6.6829	6.4562	6.5827	6.53
metab_160	pos_162	353.038	0.9805	0.865	0.0067	0.0121	5.3683	5.0416	6.4236	5.7129	6.5552	5.5	6.7795	6.3608	6.3835	6.7673	6.7583	6.9522
metab_161	pos_163	278.123	1.6102	0.7445	0.0001	0.0005	5.617	4.8311	6.8563	6.093	6.8842	5.4571	8.07	7.9573	7.7009	7.8336	8.2537	8.1821
metab_162	pos_164	272.112	0.6793	0.9225	0.0394	0.0572	6.5512	5.8752	6.1674	6.0641	6.5126	6.0607	6.9449	6.7671	6.2195	6.3434	7.5069	6.574
metab_163	pos_165	260.112	1.491	0.7632	0.0003	0.0009	5.5574	4.6365	6.6444	5.9253	6.6702	5.2912	7.6063	7.5599	7.2072	7.4904	7.8403	7.797
metab_164	pos_166	226.107	0.5107	1.0627	0.0892	0.1186	7.2224	6.525	6.1633	6.6099	6.5336	6.0162	6.2868	5.8997	5.8217	6.2593	5.9776	6.5219
metab_165	pos_167	95.0495	0.4143	1.0474	0.1528	0.1907	6.3747	5.975	5.6144	5.888	5.4064	5.5076	5.6643	5.6188	5.5343	5.3256	5.7988	5.2508
metab_166	pos_168	290.171	0.8403	1.0967	0.0001	0.0004	6.0298	6.107	6.0552	6.1978	6.1975	6.3767	5.7759	5.8785	5.6382	5.4647	5.4781	5.4717
metab_167	pos_169	364.087	1.5432	0.7327	0.0002	0.0006	6.1488	4.3717	4.3276	5.2367	5.1595	5.387	7.2264	7.0905	6.9915	6.7832	7.4237	6.2853
metab_168	pos_170	196.097	0.4187	1.0337	0.0285	0.0429	6.03	5.9091	6.2345	5.9941	6.2659	5.983	5.8552	5.8952	5.6629	5.839	5.9447	6.0271
metab_169	pos_171	527.173	1.8879	0.5801	0	0.0001	3.1934	3.2261	4.9071	3.2319	4.7475	3.1672	5.9202	6.7792	6.2968	6.1203	6.6601	6.97
metab_170	pos_172	175.086	1.0487	1.1864	0.0001	0.0002	5.6362	5.2595	5.6149	5.3615	5.3172	5.2657	4.7342	4.1781	4.8654	4.745	4.3537	4.4758
metab_171	pos_173	200.047	0.4591	1.0226	0.0028	0.0057	8.3381	8.4892	8.348	8.4465	8.2536	8.5519	8.1971	8.2508	8.182	8.1826	8.2393	8.2596
metab_172	pos_174	264.18	0.8784	0.7973	0.1055	0.1376	3.9775	5.6884	3.8672	5.1154	4.248	3.5167	6.9942	6.024	3.1709	5.1869	5.6456	6.1019
metab_173	pos_175	245.092	0.7244	1.0933	0.0017	0.0038	5.3113	5.3163	5.3929	5.525	5.8952	5.5459	5.1781	4.9082	4.7682	5.1045	5.0483	5.1642
metab_174	pos_176	406.134	0.0444	1.0047	0.9657	0.9718	5.9747	4.4266	6.9686	5.1697	4.5878	3.4699	4.519	4.9225	5.2807	5.2448	5.628	4.8625
metab_175	pos_177	395.133	0.7941	0.9117	0.0047	0.0089	6.4937	5.7036	5.7899	5.9482	5.9444	5.8731	6.4581	6.6084	6.4778	6.8184	6.7836	6.0683
metab_176	pos_178	354.118	0.574	1.0885	0.0822	0.11	5.3311	5.3514	5.2358	5.6824	6.3322	5.3556	5.3184	5.1355	4.5897	4.7572	5.6977	5.0824
metab_177	pos_179	547.178	1.8164	0.6362	0	0.0001	5.4811	4.2482	3.7171	3.8133	4.3827	3.7485	6.4496	6.6783	7.0681	6.1885	6.6996	6.8267
metab_178	pos_180	171.08	0.5594	1.077	0.061	0.0844	6.1488	5.1947	5.4373	5.5024	5.693	5.0122	4.845	5.4158	5.0697	5.1639	5.2625	4.8728
metab_179	pos_181	549.194	1.5321	0.7301	0.0002	0.0006	5.9395	4.5782	4.9481	5.1665	5.692	3.8171	6.6756	7.0684	7.0173	6.5533	7.1395	6.8346
metab_180	pos_182	229.086	1.3048	1.3263	0.0012	0.0028	6.8361	5.5136	5.7757	6.023	5.5811	5.1658	4.6836	4.2385	5.0524	4.4441	4.4501	3.4427
metab_181	pos_183	365.12	1.5792	0.6844	0.0003	0.001	4.6086	3.1349	4.056	4.8027	5.5462	3.8305	5.9251	6.8063	6.1889	5.9006	6.6512	6.491
metab_182	pos_184	549.194	1.1107	0.8685	0.0001	0.0004	6.8522	6.1886	6.3772	6.3346	6.6818	5.8378	7.2281	7.5331	7.4154	7.2203	7.4982	7.174
metab_183	pos_185	425.18	0.3729	1.052	0.2949	0.3443	6.987	6.4389	6.3378	6.4311	6.1918	5.8421	6.2627	5.9692	5.0362	6.6815	5.857	6.5288
metab_184	pos_186	563.209	0.6561	0.9174	0.0507	0.0716	6.1361	5.4066	6.4576	5.6618	5.8006	5.5186	6.4943	6.6726	5.5237	6.3579	6.572	6.5088
metab_185	pos_187	279.12	1.1703	1.2159	0.0002	0.0005	5.8995	5.9139	5.9152	6.169	6.7178	5.7163	5.0787	4.9692	5.3279	4.5693	5.1538	4.7811
metab_186	pos_188	481.131	1.3148	0.7303	0.0065	0.0118	6.0273	3.55	5.3788	4.8414	3.5787	3.4911	6.1189	5.6304	6.469	6.6042	6.4243	5.544
metab_187	pos_189	238.038	0.5016	1.1165	0.2884	0.3376	3.4885	4.5004	6.2915	4.8814	4.8895	5.0491	4.5818	3.2672	3.9166	4.9061	4.8598	4.532
metab_188	pos_190	346.149	0.726	0.9151	0.0128	0.0212	6.0931	5.6538	5.4746	5.685	5.5535	5.184	6.5936	5.9491	5.7165	6.0847	6.2755	6.1438
metab_189	pos_191	206.081	0.7821	1.0999	0.001	0.0024	5.3359	5.6146	5.5159	5.7745	6.0838	5.8137	5.202	5.325	5.0487	5.1645	5.1325	5.1678
metab_190	pos_192	450.196	0.7936	0.8906	0.0327	0.0485	6.8057	5.3245	5.8068	5.9724	5.2423	5.527	6.1582	6.3288	7.1332	6.3442	6.8383	6.1374
metab_191	pos_193	277.104	1.0396	1.1761	0.0008	0.002	5.9479	5.7974	5.7451	6.1459	6.615	5.5825	5.0824	5.4533	5.2251	4.6393	5.1856	4.8819
metab_192	pos_194	227.127	0.6545	1.0978	0.0528	0.0743	5.5053	5.163	6.268	5.2999	5.1725	5.0375	5.1852	4.986	5.0969	4.6899	5.1473	4.4492
metab_193	pos_195	492.207	1.4495	0.726	0.0005	0.0014	5.8165	4.2985	4.2082	4.3044	4.3098	4.2396	5.4809	6.4065	6.9454	6.0213	6.7025	5.8701
metab_194	pos_196	333.133	1.0507	1.1558	0.0002	0.0005	6.1618	6.1455	6.7292	6.2156	6.0777	6.454	5.3384	5.4786	5.8062	5.1539	5.6619	5.2487
metab_195	pos_197	420.186	0.4732	0.9436	0.1772	0.2181	7.4854	6.07	7.1344	6.7187	6.3631	6.0971	7.2167	7.1746	7.1304	7.1906	7.1908	6.3477
metab_196	pos_198	222.087	0.6806	0.9107	0.0423	0.0611	5.2308	5.5012	5.3678	5.3736	5.3215	5.2231	5.9556	4.8688	5.9943	5.8998	6.5296	5.9068
metab_197	pos_199	215.107	0.5318	1.0608	0.0785	0.1055	7.2868	6.3227	6.3782	6.617	6.7246	6.1116	5.926	6.4573	6.1912	6.3122	6.3735	5.917
metab_198	pos_200	144.081	0.3947	0.9569	0.1827	0.2241	6.1827	5.6483	6.822	5.8514	6.0709	5.6722	6.4109	6.0701	6.5168	6.381	6.2931	6.2082
metab_199	pos_201	462.196	1.2501	0.7754	0.003	0.006	5.7483	4.6165	4.5261	4.6772	4.6851	4.5575	6.3193	5.639	7.3708	6.2677	6.3602	5.2029
metab_200	pos_202	107.049	1.0139	1.145	0	0	5.7224	5.8185	5.5838	5.8098	5.6569	5.6674	4.9543	5.0122	4.9962	4.9381	4.9953	5.0236
metab_201	pos_203	398.202	0.4838	0.9047	0.3146	0.3651	6.0929	3.8317	6.9457	5.2339	4.652	4.6336	6.249	5.1994	6.3624	6.1535	5.8259	4.9072
metab_202	pos_204	441.1	0.1006	0.9644	0.8279	0.8538	4.38	3.0669	6.8771	3.3	3.9903	3.7652	4.9685	3.5172	5.3192	4.8872	4.8821	2.7423
metab_203	pos_205	236.091	0.1534	1.0137	0.5158	0.5656	4.972	5.161	5.3265	5.0337	5.0089	5.0852	5.2938	4.9448	4.9194	4.7805	5.29	4.9478
metab_204	pos_206	237.148	1.2612	1.2446	0	0.0001	5.8949	6.0816	6.1454	5.965	6.1982	5.773	4.874	5.2119	4.351	4.9193	5.158	4.4601
metab_205	pos_207	207.065	0.0534	1.0046	0.8987	0.9156	5.3938	4.9749	5.9918	5.0595	4.806	5.1484	5.2469	5.1183	5.211	5.2704	5.4204	4.964
metab_206	pos_208	237.112	0.6088	1.0727	0.024	0.0368	5.8914	5.4802	6.1074	5.5013	5.819	5.2835	5.4596	5.5586	5.2154	5.1003	5.2567	5.1773
metab_207	pos_209	674.28	1.0196	0.8591	0.0031	0.0063	6.0759	5.2855	5.8194	5.6078	6.0137	5.119	6.7606	6.7825	5.7632	6.8225	6.9529	6.4058
metab_208	pos_210	229.086	0.9872	1.204	0.0162	0.0261	7.2237	5.576	6.1309	6.3737	5.345	5.0891	5.0839	4.4995	4.8278	4.771	5.5123	4.99
metab_209	pos_211	473.235	0.6484	0.9236	0.0254	0.0388	5.9338	5.4243	6.1109	5.4395	5.4091	5.3356	6.1164	6.1522	5.5822	6.4027	6.2394	5.9436
metab_210	pos_212	365.12	1.6386	0.6764	0.0004	0.001	5.0974	3.8531	6.0023	3.9977	5.1015	3.3968	6.6855	7.0114	6.8894	6.3056	6.8999	6.7942
metab_211	pos_213	300.191	0.709	1.0845	0.0009	0.0022	5.4473	5.4284	5.7185	5.2891	5.4992	5.1969	5.0542	4.7807	5.1554	5.0578	4.9353	5.0587
metab_212	pos_214	188.07	0.0648	1.005	0.816	0.8429	7.6361	7.7519	7.6848	7.7681	7.4905	7.9207	7.8429	7.3747	8.2589	7.5675	7.2606	7.721
metab_213	pos_215	426.034	1.1786	0.8127	0.0002	0.0006	4.9121	4.9448	4.8544	4.9506	4.8764	4.8858	6.3534	6.2371	6.0997	5.8584	6.4983	5.1601
metab_214	pos_216	199.06	0.5713	1.0642	0.0439	0.0631	5.9328	6.0905	6.8759	6.0212	6.1725	6.0933	5.8509	5.6341	5.6907	5.7307	6.1965	5.8438
metab_215	pos_217	247.069	0.9775	1.1852	0.0039	0.0076	5.4666	4.904	5.7744	5.6006	6.4069	5.3247	4.9882	4.485	5.032	4.5227	4.8301	4.3881
metab_216	pos_219	426.034	2.02	0.4531	0.0014	0.0031	5.2308	1.2079	1.1237	4.2746	1.1441	4.226	6.5708	6.5298	6.4066	6.1738	6.6009	5.6968
metab_217	pos_220	243.05	0.9185	0.8797	0.0012	0.0027	5.2828	5.3002	5.7717	5.4983	5.5181	5.4043	6.4413	6.4031	6.2631	5.959	6.5899	5.6039
metab_218	pos_221	369.029	1.0216	0.8376	0.0083	0.0145	5.5925	4.9334	6.7901	4.9392	4.9728	4.8744	6.3183	6.3917	6.6567	6.1275	6.4528	6.3759
metab_219	pos_222	152.056	1.5769	1.3422	0	0	6.7515	7.0798	6.8142	6.9762	6.5888	7.1642	5.3336	5.1864	4.8298	5.0311	5.3146	5.1336
metab_220	pos_223	440.175	0.4272	0.9658	0.0474	0.0674	5.9529	6.2492	5.9958	6.1604	6.0062	6.1923	6.2164	6.3706	6.0862	6.1168	6.552	6.5123
metab_221	pos_224	289.091	1.1523	0.8032	0.0019	0.0041	5.1806	4.4507	6.0091	4.4865	4.3823	4.3917	5.9876	5.9056	6.3561	5.692	6.0538	5.9889
metab_222	pos_225	245.077	1.185	1.2159	0	0.0001	5.7945	5.9149	5.6528	5.8307	5.7136	5.9344	4.8822	5.1415	5.0713	4.6304	4.5505	4.3819
metab_223	pos_226	684.255	1.0825	0.8227	0.0133	0.022	5.2438	5.2764	7.7109	5.7883	5.5919	5.2175	7.003	6.9614	7.7248	6.8343	7.0539	6.7587
metab_224	pos_227	256.118	0.6218	0.9422	0.0414	0.0599	7.5869	6.976	7.0598	7.1367	7.3599	6.6603	7.6078	7.799	7.0742	7.8408	7.2554	7.8263
metab_225	pos_228	666.244	0.2484	0.9487	0.5435	0.5918	4.602	4.6347	6.0353	4.6405	4.5663	4.5757	4.4167	5.1819	6.602	4.2744	4.9174	5.2294
metab_226	pos_229	215.052	1.0342	1.198	0.0015	0.0034	5.833	5.1846	5.5688	5.6076	5.9112	5.2579	4.2309	5.2772	4.1877	5.0168	4.5946	4.5449
metab_227	pos_230	527.158	0.9624	0.8644	0.0216	0.0336	6.6753	5.3706	7.9217	6.5478	6.5968	5.7577	7.5929	7.252	7.8744	7.2453	7.6042	7.3935
metab_228	pos_231	218.102	0.4776	1.0323	0.0055	0.0102	6.5732	6.5159	6.7578	6.6045	6.7845	6.6334	6.478	6.5829	6.3309	6.3335	6.4916	6.4022
metab_229	pos_232	143.081	1.104	1.1717	0	0.0001	6.4166	6.7818	6.1539	6.4205	6.0964	6.4132	5.3044	5.2892	5.193	5.7276	5.5681	5.5891
metab_230	pos_233	129.018	0.8078	0.9045	0.0074	0.0131	5.5773	5.4443	6.4823	5.7692	6.0273	6.0665	6.5555	6.3387	6.3217	6.965	6.3122	6.6054
metab_231	pos_234	394.134	2.0725	0.4935	0	0.0001	2.7082	2.7408	2.6506	2.7466	5.1111	2.682	6.3041	6	5.6556	6.9351	6.3877	6.4937
metab_232	pos_235	268.014	1.1498	1.2124	0	0	5.6359	5.5046	5.714	5.5918	5.0713	5.6725	4.4795	4.7	4.6117	4.2945	4.6224	4.6694
metab_233	pos_236	311.075	0.4623	0.939	0.2972	0.3467	6.3346	5.41	6.577	7.1408	8.0074	6.1612	7.4138	6.6679	6.7709	6.7471	7.4312	7.1727
metab_234	pos_237	230.049	0.5374	1.057	0.0536	0.0753	6.5917	6.1076	6.671	6.918	7.0295	6.5294	6.4868	6.1155	6.2656	5.9137	6.5287	6.3867
metab_235	pos_238	297.039	1.3001	1.2419	0	0	6.5092	6.2069	6.7322	6.3952	5.9444	6.537	5.3708	5.0271	5.048	4.8532	5.1707	5.3884
metab_236	pos_239	354.029	0.5973	1.0569	0.0065	0.0117	6.2304	6.2363	6.1571	6.4879	6.5526	6.3544	6.0298	6.1066	5.7111	5.8216	6.1877	6.1118
metab_237	pos_240	666.244	0.6537	0.8514	0.1808	0.222	4.2266	3.4859	5.1643	4.0559	3.4176	4.822	4.0139	4.4318	6.9128	4.4189	4.7951	4.9901
metab_238	pos_241	161.012	0.7246	1.1349	0.0385	0.056	5.3477	5.5086	4.9164	5.3208	4.8747	5.2794	4.7335	4.8811	3.4537	4.8344	4.5533	5.081
metab_239	pos_242	192.065	0.3617	0.9641	0.2317	0.2773	6.0074	5.7863	6.3458	6.3539	6.949	6.0558	6.626	6.161	6.6417	6.3532	6.626	6.4897
metab_240	pos_243	446.15	1.036	0.815	0.0127	0.0211	4.6268	4.3485	5.9985	4.58	5.7296	4.2896	5.9643	6.4	6.0484	6.1684	6.6017	5.1035
metab_241	pos_244	274.092	0.5257	0.9539	0.1122	0.1453	7.7791	7.4221	8.1871	8.1978	8.8657	7.7611	8.5905	8.0625	8.5986	8.2861	8.5715	8.429
metab_242	pos_245	138.055	0.3236	1.025	0.1656	0.2054	7.2297	7.2935	7.0144	7.3571	7.5817	7.5154	7.0462	7.4398	7.1397	7.0699	6.8715	7.3518
metab_243	pos_246	365.075	0.3302	1.0501	0.3891	0.4408	5.6583	5.6313	6.5165	5.7061	5.4216	5.7606	5.0617	5.3599	4.7091	6.6048	5.5633	5.7361
metab_244	pos_247	174.991	0.283	1.0275	0.2647	0.3126	5.9068	5.8864	6.4774	6.0384	6.2236	5.9767	6.1161	5.5309	5.7187	6.0226	6.1746	5.972
metab_246	pos_249	309.129	1.0286	0.8883	0.0034	0.0067	7.2284	6.7918	7.5402	7.6829	8.4073	7.3437	8.5442	8.0747	8.8434	8.2414	8.5917	8.3539
metab_247	pos_250	151.021	1.2055	1.267	0.0003	0.0009	5.5496	5.6273	5.392	5.6671	5.6694	5.7167	4.333	4.4794	3.625	5.2452	4.5999	4.2582
metab_248	pos_251	182.081	1.0213	1.1117	0.0001	0.0004	7.7695	8.0826	7.8461	8.0827	7.7452	8.2644	7.3835	7.3151	7.4217	6.9417	6.8407	7.0852
metab_249	pos_252	99.0443	0.4477	0.9724	0.0065	0.0118	6.6892	6.8331	6.7888	6.6722	6.7251	6.5929	6.7835	7.0152	6.8729	6.8148	6.9147	7.0495
metab_250	pos_253	223.06	0.4557	0.9588	0.0672	0.092	6.0907	6.2283	6.7878	6.2535	6.6553	6.2043	6.4745	6.8298	6.7045	6.4391	6.6011	6.8158
metab_251	pos_254	234.097	1.0049	0.892	0.0011	0.0025	6.8595	6.5667	7.1997	6.9351	7.4061	6.7418	7.4297	7.8784	7.3188	8.0852	8.0576	7.9955
metab_252	pos_255	257.16	1.2206	0.8273	0	0.0001	5.3976	5.1185	5.0282	5.4807	5.0502	5.9787	6.5599	6.4382	6.2931	6.4247	6.4319	6.597
metab_253	pos_256	295.113	0.6539	0.9309	0.0445	0.0639	6.6261	5.9679	6.8566	6.4728	6.7694	6.2447	7.3797	6.3428	7.0178	6.765	6.9642	7.3628
metab_254	pos_257	184.064	2.0766	1.6822	0	0	7.3508	7.5641	7.0123	7.6148	7.4147	7.753	4.3479	4.4955	4.3047	4.6618	4.4216	4.3488
metab_255	pos_258	1008.36	1.2881	0.7666	0.0065	0.0118	4.8466	4.8793	7.4196	4.8851	5.1287	4.8203	6.9197	6.3532	7.8526	6.9702	7.1473	6.4732
metab_256	pos_259	163.06	0.8941	0.915	0.0001	0.0003	6.9239	6.5269	6.535	6.5776	6.6527	6.6102	7.4115	7.4162	7.138	7.0209	7.43	7.1141
metab_257	pos_260	220.081	0.2784	1.0297	0.3529	0.4035	6.1779	6.0972	6.3617	6.3772	6.6453	6.3542	5.4605	6.6848	5.9231	6.3002	6.2213	6.3284
metab_258	pos_261	276.144	0.7724	0.9404	0.0005	0.0014	7.819	7.4355	7.7695	7.6222	7.8884	7.4405	8.2669	8.1389	8.2449	8.1827	7.8905	8.1674
metab_259	pos_262	250.092	0.7607	0.9212	0.0094	0.0162	6.5244	5.916	6.7554	6.5049	6.9592	6.3328	6.8545	7.2381	6.7348	7.2948	7.0097	7.1975
metab_260	pos_263	458.769	0.3151	1.0248	0.1271	0.1622	6.2452	6.4028	6.2118	6.3774	6.6019	6.1157	6.0538	6.1981	5.9529	6.3606	6.2358	6.2339
metab_261	pos_264	223.061	0.1134	0.9892	0.671	0.7106	6.2267	6.375	6.5935	6.3693	6.3161	6.493	6.3488	6.172	7.1901	6.3725	6.2458	6.464
metab_264	pos_267	271.081	1.489	0.6977	0.0029	0.0058	4.16	3.2173	6.6634	4.108	5.138	4.4163	6.4628	6.2032	7.4269	6.5448	6.4735	6.5895
metab_270	pos_273	236.905	0.7689	1.0763	0	0.0001	6.1434	6.378	6.2993	6.1198	6.1365	6.1636	5.7459	5.7051	5.6962	5.925	5.7813	5.7505
metab_271	pos_274	278.087	1.1207	0.8356	0.0028	0.0056	6.3646	5.3209	4.5697	5.7268	5.7322	5.7291	6.9096	6.9184	6.6808	6.3642	6.9821	6.1727
metab_272	pos_275	123.014	0.5716	1.0381	0	0	6.4578	6.5755	6.5838	6.5143	6.466	6.6126	6.2934	6.2659	6.3097	6.3216	6.2689	6.3086
metab_273	pos_276	399.126	0.9561	0.8626	0.0064	0.0116	5.9517	4.891	5.9943	5.3486	5.8543	4.5827	6.1729	6.3952	6.5255	6.0957	6.2547	6.3735
metab_274	pos_277	105.004	0.6827	1.0465	0	0	7.4145	7.5676	7.5778	7.4824	7.4448	7.5758	7.2126	7.1538	7.1779	7.2167	7.1392	7.1534
metab_275	pos_278	100.025	0.6429	1.0448	0	0	6.921	7.077	7.0786	6.9864	6.9086	7.0344	6.7463	6.6711	6.7053	6.7413	6.6616	6.6798
metab_276	pos_279	423.197	0.8781	1.1189	0.0014	0.0032	6.5247	6.1098	5.8327	6.3455	6.4283	6.1931	5.7846	5.953	5.2023	5.6213	5.5467	5.3466
metab_277	pos_280	141.958	0.564	1.0314	0	0.0001	7.6426	7.7828	7.7054	7.7651	7.652	7.8048	7.4962	7.5225	7.467	7.4577	7.4885	7.5105
metab_278	pos_281	124.024	0.6352	1.0528	0	0.0001	5.88	6.0015	6.0039	5.9285	5.7932	5.9457	5.6856	5.5813	5.6463	5.677	5.5713	5.6071
metab_280	pos_283	129.023	0.667	1.0519	0	0	6.4529	6.5616	6.5676	6.5314	6.4526	6.5622	6.2659	6.1705	6.2071	6.256	6.0907	6.2018
metab_282	pos_285	223.989	0.6721	1.0489	0	0.0001	7.1122	7.2944	7.3192	7.1811	7.0867	7.2278	6.9238	6.8111	6.8769	6.9526	6.8226	6.8223
metab_283	pos_286	287.888	0.5347	1.0371	0.0001	0.0003	6.0777	6.2401	6.1394	6.19	6.094	6.2765	5.974	5.9415	5.9486	5.8907	5.9715	5.9688
metab_284	pos_287	408.149	1.3702	0.7414	0.0084	0.0148	4.6457	3.8772	7.078	5.2987	6.5538	4.0026	7.232	6.8124	6.6698	7.3014	6.8902	7.529
metab_285	pos_288	416.916	0.8486	1.0973	0.0002	0.0007	6.3765	6.6719	6.5793	6.4679	6.3604	6.3252	6.0832	5.4989	5.9545	6.0003	5.9833	5.828
metab_286	pos_289	288.107	0.5852	1.1018	0.1259	0.1609	5.5237	4.4631	5.8489	5.9203	6.6876	5.2526	5.1061	4.9639	5.0139	5.2036	5.3571	4.94
metab_287	pos_290	120.081	0.7491	1.0732	0.0062	0.0112	7.6978	8.0154	7.536	8.0088	7.74	8.1646	7.5328	7.0243	7.6882	6.9686	7.223	7.509
metab_288	pos_291	335.123	0.3831	1.0478	0.2493	0.2962	6.1038	6.2058	6.0261	5.9833	5.8738	5.9652	5.8607	5.8875	5.1102	5.4459	6.6797	5.5244
metab_289	pos_292	382.928	0.7389	1.0653	0.0001	0.0004	6.8044	6.9417	7.0705	6.818	6.8081	6.9668	6.5608	6.3575	6.5042	6.6847	6.3771	6.3907
metab_290	pos_293	124.076	0.2059	1.0166	0.3048	0.3545	5.3948	5.7379	5.4388	5.5158	5.4759	5.4913	5.6749	5.2956	5.2448	5.327	5.5525	5.4178
metab_291	pos_294	216.123	1.5894	0.7077	0	0	4.182	4.5022	4.3002	4.4446	4.5917	4.3557	6.1837	6.4713	6.2995	5.5897	6.4289	6.3014
metab_292	pos_295	286.958	0.6661	1.0512	0.0001	0.0004	6.9629	7.0644	7.2134	6.9834	7.008	7.171	6.776	6.6702	6.7471	6.867	6.6028	6.6725
metab_293	pos_296	222.112	0.53	1.0616	0.1039	0.1356	7.0792	6.9645	6.5749	6.799	6.6539	6.7559	6.704	6.013	6.8617	5.9314	7.0201	5.9309
metab_295	pos_298	526.757	0.7594	1.0828	0.0007	0.0018	6.5865	6.341	6.1	6.4775	6.3673	6.1111	5.7212	6.0539	5.6393	5.8992	5.8324	5.9385
metab_296	pos_299	380.133	1.0832	0.8315	0.002	0.0043	5.4693	4.4691	5.278	5.0942	5.6458	4.1547	5.9183	6.1185	6.0154	5.8369	6.092	6.2372
metab_297	pos_300	213.076	1.2134	1.1969	0	0	6.4879	6.6131	6.1492	6.4897	6.3107	6.2744	5.2984	5.4763	5.2492	5.2053	5.4481	5.3434
metab_298	pos_301	159.053	1.1362	1.2329	0	0	4.9695	5.2416	4.6421	5.0937	4.796	5.0227	3.9884	4.1031	3.9586	4.0563	4.1247	3.9154
metab_299	pos_302	211.133	1.3785	1.2673	0	0	6.2346	6.619	6.1575	6.3609	6.314	6.2648	5.078	5.1553	5.0131	4.8544	4.896	4.9504
metab_300	pos_303	606.296	1.7997	0.67	0	0.0001	5.2463	5.3637	4.1526	5.2535	5.0796	4.2617	7.1595	7.954	6.6221	7.6526	6.9705	7.4585
metab_301	pos_304	339.107	0.9926	1.2479	0.0354	0.0521	6.1723	5.1596	4.5963	6.5659	7.4316	6.1118	4.3276	5.158	4.7046	4.9959	3.9122	5.7784
metab_302	pos_305	524.212	1.0318	0.8391	0.0021	0.0045	5.5873	4.8117	4.2252	4.6986	4.822	4.2566	5.5931	5.4995	5.7178	5.4545	6.0463	5.5399
metab_303	pos_306	491.152	1.3874	1.3438	0.0001	0.0003	5.6654	5.9664	6.2354	5.6879	5.6338	5.8674	4.4527	4.6065	3.9489	3.555	4.4231	5.1035
metab_304	pos_307	215.107	1.1009	1.1767	0.0004	0.0011	6.9209	6.1933	6.6298	6.4417	6.5929	6.0903	5.1838	6.0458	5.3187	5.3382	5.8049	5.3378
metab_305	pos_308	244.154	1.9147	1.8029	0	0	5.5159	5.8948	6.3869	5.6135	5.6928	5.7388	3.7967	3.0454	3.1278	3.4087	3.0114	2.9386
metab_306	pos_309	434.202	1.0888	0.8284	0.0094	0.0163	6.8998	5.1539	6.0449	6.0532	5.1725	5.4003	7.3697	7.3324	7.2852	6.7701	7.3405	5.8174
metab_307	pos_310	539.188	1.7388	1.4869	0	0	6.9014	6.9227	6.7679	6.8583	6.8778	6.5505	5.2532	3.8615	5.2828	4.1554	4.8237	4.1173
metab_308	pos_311	214.143	0.7168	1.0876	0.0115	0.0193	5.9778	6.2524	6.5437	5.9844	5.8449	5.9867	5.6229	5.3786	6.0847	5.8057	5.325	5.4227
metab_309	pos_312	387.104	1.336	1.257	0	0	6.16	6.492	5.9001	6.4042	6.2224	6.1169	5.1638	5.0452	4.9685	4.8125	4.9182	4.7645
metab_310	pos_313	395.094	0.2518	0.9702	0.4085	0.4606	6.6166	5.8301	5.8772	5.9434	5.5347	5.3745	6.0241	6.3393	5.8056	6.0467	6.3709	5.6722
metab_311	pos_314	539.188	1.7129	1.474	0	0.0001	6.7773	6.9486	6.6487	6.8305	6.8694	6.5271	5.2249	4.4617	5.3192	3.9645	4.9446	3.6283
metab_312	pos_315	170.117	0.7193	1.0665	0.0001	0.0002	6.3292	6.5309	6.3704	6.3932	6.2689	6.4239	6.1174	5.8064	6.0086	6.0743	5.8973	6.0212
metab_313	pos_316	154.086	0.016	1.0018	0.8865	0.9049	5.4555	5.4924	5.4202	5.4397	5.3658	5.4337	5.4072	5.2733	5.318	5.6917	5.3305	5.5277
metab_314	pos_317	151.075	1.0421	1.1496	0	0	5.8462	6.0188	6.0218	5.9012	5.8942	5.8635	5.0887	5.2911	5.0823	4.9566	5.2868	5.2131
metab_315	pos_318	327.159	1.4351	0.7798	0.0001	0.0003	6.3542	5.5507	4.7744	5.6506	5.7307	4.9916	6.9257	6.9744	7.1588	6.8747	7.2143	7.244
metab_316	pos_319	547.215	1.503	0.7825	0	0	6.4557	5.7144	5.6677	6.0086	5.9921	5.3605	7.3967	7.4002	7.5786	7.2853	7.6391	7.6877
metab_317	pos_320	433.148	0.73	1.1178	0.0596	0.0827	5.8968	5.8758	6.2997	5.8126	6.0239	5.8998	4.8092	5.62	5.7314	6.2353	5.3747	4.2637
metab_318	pos_321	231.122	1.9313	1.7624	0	0	5.5911	6.2818	6.203	5.9758	5.9836	6.0646	3.4137	3.2418	3.5975	3.4781	3.6192	3.135
metab_319	pos_322	449.107	1.6141	1.3571	0	0	8.1614	7.2943	6.687	7.5654	7.633	7.2306	5.6812	5.1173	5.5584	5.7074	5.5402	5.237
metab_320	pos_323	351.141	0.4043	1.0465	0.1786	0.2197	6.5971	5.7916	6.1543	5.9924	5.7588	5.5171	5.3649	6.0458	5.5757	5.7854	5.8592	5.5952
metab_321	pos_324	738.317	1.7244	0.6991	0	0	5.0592	5.0922	4.9723	5.0949	5.0904	4.5725	6.3395	7.4077	6.9914	7.3698	7.3408	7.2905
metab_322	pos_325	327.122	0.1239	1.0102	0.6354	0.6779	5.9507	5.9068	6.068	5.9194	6.2231	5.5576	5.7148	6.2154	5.7077	5.756	6.0184	5.8541
metab_323	pos_326	251.164	0.6045	0.9421	0.0111	0.0187	6.3579	6.0149	6.3949	5.947	5.8492	5.7419	6.4134	6.4463	6.5773	6.502	6.2451	6.351
metab_324	pos_327	370.183	1.3716	1.6491	0.0041	0.0079	4.2197	4.1606	5.9214	4.0871	4.1321	2.6588	3.2384	2.5692	2.314	2.3584	2.4304	2.3579
metab_325	pos_328	539.173	1.9612	0.5955	0	0	4.8106	3.791	3.8852	3.62	4.3877	3.5553	6.5975	6.6506	6.6956	6.6543	7.1197	6.6608
metab_326	pos_329	538.228	1.2473	0.8192	0.0006	0.0015	6.2712	5.8705	5.703	5.8039	6.3309	4.645	7.0327	7.0719	7.075	6.7316	7.1749	7.1865
metab_327	pos_330	488.176	0.6998	1.1188	0.0787	0.1058	6.766	5.4419	5.851	6.395	7.0705	5.8776	5.7757	5.735	6.2653	5.6398	4.6051	5.4129
metab_328	pos_331	263.127	0.704	1.0851	0.0059	0.0108	6.3285	6.3065	6.0823	5.9053	5.7887	5.6963	5.3691	5.4925	5.2703	5.7042	5.7051	5.7378
metab_329	pos_332	387.141	0.7439	0.9155	0.0125	0.0209	5.9586	6.0128	6.023	6.0825	6.5682	5.6224	6.4266	7.1101	6.2208	6.3456	6.7196	6.7947
metab_330	pos_333	389.12	1.7121	1.4546	0	0	6.3421	6.6271	7.1567	6.5277	6.5407	6.587	4.7382	4.9064	4.3177	4.4938	4.8708	4.0225
metab_331	pos_334	139.112	1.1122	1.2292	0.0001	0.0004	5.5552	4.8869	5.6682	5.0293	4.815	4.8413	4.1161	4.2183	4.1666	4.1893	4.2693	4.0973
metab_332	pos_335	419.167	0.6378	1.0813	0.0478	0.068	7.0916	6.1036	6.5662	6.4899	5.9258	5.8212	5.586	5.9162	5.9541	6.1023	5.9451	5.6396
metab_333	pos_336	258.17	1.1606	1.2682	0.0036	0.0071	5.1626	5.4373	6.4562	5.3482	5.5514	5.641	4.5237	5.3197	3.9934	3.6384	4.1209	4.8942
metab_334	pos_337	435.163	0.2727	0.96	0.4596	0.5117	6.9112	5.7052	6.0412	6.1336	5.2892	5.6522	6.1026	6.5458	6.3062	6.881	6.1632	5.221
metab_335	pos_338	429.172	0.2214	1.0298	0.5553	0.6034	6.2796	5.2603	6.4682	5.5041	5.7362	4.9563	5.0169	5.7902	5.6389	5.4513	5.8829	5.4341
metab_336	pos_339	589.269	0.0006	1.0002	0.9977	0.998	4.5387	4.7766	3.6462	4.9271	5.6832	4.5934	3.4362	6.182	4.1882	5.5575	4.2927	4.4998
metab_337	pos_340	413.12	1.4832	1.3611	0	0.0001	5.7189	6.2996	6.1572	6.3828	6.3746	5.6847	4.4631	5.1139	4.1194	4.164	4.8809	4.1635
metab_338	pos_341	595.214	0.5006	1.0709	0.1808	0.222	5.9837	6.4544	5.4709	6.6737	7.1672	6.0519	5.8378	6.3682	6.0883	5.1959	5.9632	5.8447
metab_339	pos_342	369.152	0.9024	1.1472	0.0103	0.0176	6.5593	5.7054	6.5537	5.8753	5.8775	5.4836	4.9572	5.5635	5.6115	5.118	5.5417	4.6385
metab_340	pos_343	245.138	1.8747	1.5883	0	0	6.3998	6.8538	6.9188	6.5808	6.5573	6.62	4.2412	3.9338	4.3411	3.8612	4.5389	4.2216
metab_341	pos_344	583.234	1.4757	0.7423	0.0002	0.0006	5.7441	4.3315	5.4235	4.509	5.5529	4.2725	6.301	7.1755	6.8081	6.7247	6.779	6.3986
metab_342	pos_345	237.148	1.2797	1.2512	0	0.0001	6.0301	5.9018	6.5057	5.8338	5.9038	5.6552	4.4968	5.1241	4.679	4.8768	4.8262	4.6381
metab_343	pos_346	530.244	1.4098	0.7679	0.0004	0.0012	5.0856	5.6716	5.1188	5.4783	6.0104	5.0593	6.3186	7.7662	6.6201	7.9821	6.8477	6.6856
metab_344	pos_347	488.176	0.5678	0.9149	0.1762	0.2171	6.505	5.4249	4.6127	5.7748	6.0205	5.6431	6.4819	6.9661	5.7488	5.6518	6.7504	5.5384
metab_345	pos_348	307.102	0.5485	0.9074	0.1631	0.2026	5.7683	4.3996	4.8186	4.8021	5.2248	4.5062	5.6987	6.2133	5.0331	5.0569	5.9767	4.5512
metab_346	pos_349	438.233	0.6704	0.918	0.0446	0.064	6.6384	5.724	6.4158	5.9631	5.8441	5.506	6.6582	6.1102	7.1373	6.6111	6.6396	6.1564
metab_347	pos_350	526.228	0.9428	1.1631	0.0123	0.0205	6.6969	5.8796	6.64	6.0916	6.447	5.391	4.6529	5.9328	5.514	5.0102	5.7194	5.1108
metab_348	pos_351	423.199	0.8092	1.1238	0.0113	0.019	5.6151	5.606	5.8877	5.5392	5.5887	5.3035	4.4085	5.7233	5.1364	4.8195	5.053	4.705
metab_349	pos_352	285.111	1.2455	1.2276	0	0.0002	6.2049	6.3781	6.3909	6.291	6.35	6.0534	4.915	5.6626	5.1011	4.5171	5.4265	5.0595
metab_350	pos_353	295.188	0.3418	0.9645	0.1875	0.2293	6.1512	5.8811	6.6832	5.9065	5.811	5.808	6.4989	6.3132	6.3924	6.0177	6.2398	6.108
metab_351	pos_354	209.081	0.9529	1.1176	0	0.0002	6.2671	6.3603	6.7698	6.4824	6.7704	6.4213	5.7778	6.0236	5.7085	5.7496	5.7894	5.9109
metab_352	pos_355	842.307	0.8661	0.8427	0.1004	0.1317	6.2326	4.5151	4.4248	5.5705	6.4536	4.4562	6.7846	4.7727	7.2737	7.0241	6.0532	5.6519
metab_354	pos_357	383.1	0.8754	1.151	0.0253	0.0386	5.7112	5.6885	6.9346	5.9346	5.8008	5.1004	5.0666	5.7774	5.256	4.6326	4.8849	4.9417
metab_355	pos_358	269.136	0.7426	1.1038	0.0182	0.0289	5.7021	5.837	6.0113	5.635	5.5573	5.6465	5.0216	5.7624	5.7408	4.9082	4.8089	4.9135
metab_356	pos_359	379.136	0.1468	0.9749	0.6615	0.7019	5.3787	5.1578	7.1479	5.5281	5.2166	5.393	5.6366	5.746	5.9092	6.1637	5.4953	5.741
metab_357	pos_360	507.183	0.3513	0.9265	0.5031	0.5534	6.2503	4.8485	2.9785	5.0139	5.0837	3.8044	4.6891	5.0509	5.6358	5.0975	5.7424	3.9841
metab_358	pos_361	397.164	0.225	1.0235	0.5068	0.5569	6.7813	7.0719	6.3586	7.1614	7.7569	6.7564	6.6408	7.3908	6.8901	6.5392	6.8794	6.5864
metab_359	pos_362	581.235	0.9648	0.8983	0.0001	0.0003	6.2647	6.6763	6.2412	6.4849	6.5888	6.3158	6.9917	7.5334	7.0232	6.9939	7.1096	7.2904
metab_360	pos_363	522.29	0.599	0.9077	0.1547	0.1931	6.4257	4.6117	4.909	5.5664	5.7535	4.6676	5.9936	5.2708	6.562	5.8054	6.1273	5.4169
metab_361	pos_364	299.183	0.3325	1.0338	0.1847	0.2263	5.2464	5.5219	5.5894	5.1724	5.1475	5.2306	4.8361	5.4445	4.9294	5.3377	5.1297	5.1853
metab_362	pos_365	368.191	0.3913	0.9533	0.2495	0.2964	6.0488	5.2381	5.5038	5.8197	6.4129	5.419	5.6457	6.4144	5.7334	6.4892	5.9576	5.8883
metab_363	pos_366	525.23	0.617	0.8975	0.1712	0.2115	6.8866	4.9992	6.8654	5.9704	5.4931	4.3968	6.5062	6.0904	7.034	6.6525	6.5028	5.7828
metab_364	pos_367	369.224	0.3204	0.9714	0.2318	0.2774	6.319	6.8173	6.4477	6.4708	6.3697	6.4381	6.5471	6.6544	6.4862	6.2525	7.1602	6.9082
metab_365	pos_368	465.136	0.6603	1.1082	0.1031	0.1349	6.092	5.5234	6.8931	5.8488	5.8006	5.5388	5.2063	5.0065	5.8247	6.179	5.5248	4.4694
metab_366	pos_369	242.138	0.9539	1.1671	0.0013	0.003	5.018	5.0072	5.4104	5.7742	5.4899	5.1988	4.782	4.2548	4.8436	4.2557	4.8546	4.3382
metab_367	pos_370	217.158	0.1678	1.0147	0.537	0.5856	6.3546	6.0552	6.4623	6.0518	5.9147	5.9914	6.0541	5.8799	6.4254	6.3039	5.8105	5.8222
metab_368	pos_371	283.153	1.0953	1.1715	0	0.0001	5.706	6.2324	6.3128	5.9896	6.115	6.0367	5.022	5.5192	5.0818	5.0515	5.3921	4.9959
metab_369	pos_372	339.18	0.4556	0.9568	0.0698	0.0949	6.1232	5.9569	6.1259	6.1064	6.1314	5.926	6.1182	6.8552	5.9198	6.3526	6.3249	6.4428
metab_370	pos_373	356.279	0.7233	1.09	0.0064	0.0116	5.7058	6.0879	5.9976	5.8536	5.3511	5.8755	5.0606	5.4821	5.1118	5.6359	5.2903	5.4121
metab_372	pos_375	535.196	1.1677	1.1917	0.0003	0.0008	6.4718	6.8774	6.3624	6.8502	6.9074	6.265	5.5295	5.9603	5.8383	5.0049	5.7798	5.2319
metab_373	pos_376	493.222	0.9233	0.8721	0.0042	0.008	5.4264	5.9014	5.2588	5.2271	5.6795	4.8017	5.86	6.7727	5.9486	5.8627	6.2962	6.287
metab_374	pos_377	423.235	0.0183	1.0015	0.9016	0.9181	6.3097	5.911	6.1144	6.1935	6.1977	5.9939	6.1476	6.0712	6.1391	6.277	5.9327	6.0955
metab_375	pos_378	209.081	1.3474	1.2289	0	0	6.6068	6.7288	7.0434	6.8392	6.7869	6.8688	5.4449	5.7489	5.4337	5.5956	5.5938	5.4417
metab_376	pos_379	417.154	1.4842	1.2828	0	0	6.8628	6.9165	7.2028	7.0639	7.1217	7.0415	5.3133	5.8613	5.361	5.5703	5.6373	5.1636
metab_377	pos_380	281.138	1.073	1.1734	0	0.0001	5.5109	5.7364	6.0101	5.6317	5.4809	5.7418	4.7783	5.0917	4.969	4.5765	4.8028	4.8518
metab_378	pos_381	200.164	0.2879	1.0212	0.1967	0.2395	6.3425	6.4329	6.6177	6.409	6.1439	6.4732	6.226	6.1548	6.6126	6.2783	6.1362	6.2148
metab_379	pos_382	326.268	0.8054	1.1037	0.0016	0.0036	5.7366	6.1235	5.5141	6.2566	5.5422	5.6972	5.2428	5.3505	5.1996	5.2442	5.3165	5.2437
metab_380	pos_383	349.258	0.1448	1.018	0.6364	0.6788	5.6645	5.6728	5.8113	6.1239	5.7812	5.8764	5.6292	5.52	5.5105	5.0714	6.4207	6.16
metab_381	pos_384	581.201	1.938	1.8037	0	0.0001	5.7001	6.1283	6.7095	6.4204	6.2593	6.3265	3.7654	2.8384	4.8309	3.8455	2.8045	2.7317
metab_382	pos_385	325.2	1.0863	1.1466	0	0	6.4949	6.5524	6.555	6.5126	6.3842	6.5534	5.5	5.8255	5.7176	5.5657	5.724	5.7289
metab_383	pos_386	323.184	0.822	1.0816	0	0	6.321	6.4709	6.4043	6.4106	6.3213	6.4655	5.8487	6.0361	5.8606	5.8616	5.891	5.9966
metab_384	pos_387	519.185	0.1758	1.0361	0.7378	0.773	5.1643	5.485	4.5387	5.5895	5.5563	4.1835	4.0592	5.0314	5.0845	6.9521	4.4606	3.8638
metab_385	pos_388	318.3	0.5471	1.0353	0.0044	0.0084	8.2245	8.3884	8.0181	8.4335	8.3511	8.5384	8.004	7.9583	8.0803	8.0365	8.09	8.0854
metab_386	pos_389	195.138	0.2712	1.0175	0.1744	0.215	6.5767	6.4894	6.6069	6.4745	6.4119	6.4745	6.2969	6.7124	6.2241	6.4537	6.3265	6.348
metab_387	pos_390	497.272	1.3143	0.8126	0	0.0001	5.1937	5.8111	5.8788	5.7471	5.7575	5.7487	7.0034	7.0952	6.5154	6.6694	7.4664	7.2572
metab_388	pos_391	347.222	0.9973	1.1231	0	0.0001	6.4405	6.684	7.0139	6.6122	6.5821	6.6155	5.8427	6.1425	5.7786	6.0217	5.86	5.9232
metab_389	pos_392	298.274	1.001	1.1271	0.0001	0.0005	7.1453	7.1088	6.5276	7.0438	6.9404	6.9486	6.5341	6.3658	6.086	6.0809	6.0121	5.9307
metab_390	pos_393	351.214	0.4004	0.9776	0.013	0.0216	6.9525	6.8963	6.9655	6.9168	6.9712	7.0067	7.0161	7.2162	6.9291	7.132	7.262	7.1128
metab_391	pos_394	465.294	0.1639	0.9784	0.6164	0.6602	5.0468	5.838	4.9596	5.5471	5.2075	5.5379	5.3	5.092	6.1178	5.0287	5.8988	5.4048
metab_392	pos_395	429.262	1.2007	1.2051	0	0	6.0182	6.2754	5.9773	6.1383	6.0087	6.243	5.2039	5.4659	4.9484	4.8018	5.0858	4.9144
metab_393	pos_396	346.331	0.6604	1.069	0.0021	0.0045	6.3197	6.13	5.7332	6.1881	6.1654	6.3704	5.8816	5.6837	5.7718	5.7738	5.7039	5.7116
metab_394	pos_397	301.216	1.6307	1.4919	0	0.0001	5.8504	6.255	5.494	6.0716	5.841	6.0603	3.9298	4.802	3.5186	4.3952	3.6356	3.5627
metab_395	pos_398	856.452	0.9963	0.8649	0.0008	0.0021	5.3745	5.045	5.6219	4.8407	5.4674	4.8432	5.6953	5.6753	6.073	6.2668	6.1798	6.1764
metab_396	pos_399	329.232	0.6313	1.0759	0.0115	0.0194	5.556	5.7894	5.6245	5.613	5.6554	5.54	5.1934	5.0884	5.1997	4.8979	5.7975	5.2234
metab_397	pos_400	422.288	0.249	0.9793	0.3366	0.3877	6.1109	6.4368	6.0616	6.4629	6.7212	6.5722	6.5234	6.7113	6.1509	6.6291	6.6529	6.509
metab_398	pos_401	353.23	0.6545	0.9402	0.0061	0.0111	6.4568	6.3072	6.0961	6.2702	6.1828	6.2071	6.6256	6.5501	6.6809	6.3571	7.1149	6.5773
metab_399	pos_402	531.366	0.2474	1.0246	0.36	0.4109	5.5549	5.5521	5.5357	5.6863	5.8105	5.8244	5.5199	6.1403	5.22	5.4794	5.3378	5.4507
metab_400	pos_403	318.206	0.7053	0.8874	0.0796	0.1069	5.1731	5.3145	5.2682	5.369	5.2456	5.4102	6.6621	5.27	7.2197	6.1136	5.2494	5.2982
metab_402	pos_405	372.216	1.2508	1.3445	0.0051	0.0095	5.8198	5.4098	4.4337	6.6987	6.849	4.8834	4.1206	4.7201	4.0774	4.122	4.1943	4.1215
metab_404	pos_407	376.259	0.6948	1.052	0.0003	0.0009	7.698	7.5638	7.8125	8.0495	7.813	7.6873	7.3531	7.416	7.4148	7.3278	7.3322	7.4802
metab_405	pos_408	231.138	0.1291	0.9834	0.6643	0.7046	5.7104	6.1113	6.3913	6.0235	6.2222	5.8005	6.4654	5.7279	6.693	6.6099	5.7123	5.6594
metab_406	pos_409	241.158	1.2318	1.267	0	0.0001	4.9825	5.3859	5.9689	5.2948	5.1128	5.2067	4.4414	4.064	4.1063	4.3089	4.2567	4.0384
metab_407	pos_410	135.08	0.3497	1.0223	0.0316	0.0469	6.4227	6.3319	6.5345	6.4996	6.577	6.6564	6.3059	6.3741	6.3802	6.4023	6.2419	6.4675
metab_408	pos_411	483.309	1.3728	1.2464	0	0	7.0751	7.2817	6.4925	7.2627	6.9349	7.1749	5.7349	5.4986	5.4653	5.546	5.6901	5.9391
metab_409	pos_412	473.362	1.1409	1.1831	0.0002	0.0005	6.6884	6.8229	6.1674	6.7545	6.6885	6.6238	5.5923	6.1917	5.0614	5.6692	5.4786	5.5986
metab_410	pos_413	559.324	1.2834	1.2329	0	0	5.8663	6.3885	6.2363	6.3077	6.1012	6.1363	4.9397	5.3571	4.9115	4.9543	4.8731	5.0043
metab_411	pos_414	194.096	0.6518	0.9302	0.0033	0.0065	5.196	5.1264	5.4481	5.2401	5.4705	4.9319	5.593	5.6259	5.7934	5.567	5.7877	5.4038
metab_412	pos_415	355.186	1.1439	1.2083	0	0.0001	5.5248	5.6199	5.8476	5.7812	5.4087	5.3733	4.6178	4.9619	4.4915	4.8281	4.2382	4.6368
metab_414	pos_417	455.314	1.4478	1.2563	0	0	7.5029	7.8214	6.8759	7.7909	7.4579	7.5813	5.8586	6.4343	5.9528	5.9687	5.8489	5.7777
metab_415	pos_418	534.415	0.9898	1.2051	0.0161	0.026	5.7547	6.0203	5.1559	6.0805	5.9564	6.4191	5.3284	5.8309	3.9793	5.3189	4.0962	4.8105
metab_416	pos_419	495.309	0.5578	1.0679	0.0852	0.1136	6.7237	6.9511	6.0169	7.0242	6.7041	6.8496	6.0159	6.2675	6.4653	5.7221	6.9284	6.3128
metab_417	pos_420	509.324	1.3414	1.2782	0.0011	0.0025	7.0513	7.3543	6.1291	7.1821	6.9835	7.092	5.7088	6.3982	4.4372	5.8838	4.9763	5.2913
metab_418	pos_421	616.345	1.3378	0.8159	0.0001	0.0003	5.771	6.194	6.8473	5.7243	6.292	5.8633	7.3176	7.1663	7.6027	7.2451	7.8487	7.791
metab_419	pos_422	523.303	1.7514	1.5093	0	0	6.3234	6.7558	6.2096	6.4686	6.3357	6.513	3.7792	4.847	4.4078	4.2068	4.3145	4.023
metab_420	pos_423	511.339	0.7543	1.0777	0.0057	0.0105	7.4239	7.6235	6.7455	7.5134	7.3004	7.4328	6.7113	7.1516	6.7279	6.7486	6.9376	6.5914
metab_421	pos_424	349.235	0.3817	1.0319	0.1273	0.1624	6.3869	6.5858	6.9697	6.4312	6.7575	6.291	6.3461	6.3146	6.4527	6.2556	6.635	6.1967
metab_422	pos_425	305.21	1.3603	1.2616	0	0	6.1647	6.608	6.1899	6.4262	6.2885	6.2901	4.7863	5.4104	5.0189	4.9252	5.0477	4.9085
metab_423	pos_426	553.297	0.9213	0.8949	0.0003	0.0007	6.2815	5.6936	5.7835	5.6597	5.7335	5.5874	6.6437	6.5955	6.4399	6.3629	6.5805	6.1989
metab_424	pos_427	506.324	0.6204	0.9269	0.06	0.0832	6.1186	6.4413	5.9177	6.1604	6.0105	5.9228	6.2525	6.3594	7.256	5.8706	7.057	6.6608
metab_425	pos_428	561.339	1.2452	1.2064	0.0001	0.0005	6.733	6.9084	7.5808	6.6276	6.9575	6.7412	5.3075	6.1919	6.0629	5.6813	5.7551	5.4419
metab_426	pos_429	311.257	0.3029	0.9693	0.2666	0.3146	5.4517	5.5599	5.6111	5.2617	5.4718	5.4402	5.551	5.5583	5.3086	5.3553	6.2108	5.8499
metab_427	pos_430	532.383	0.7625	1.0865	0.0058	0.0106	6.7013	6.8452	6.567	6.9443	6.7348	6.7398	5.9	6.3004	6.0496	6.1998	6.8766	5.9779
metab_428	pos_431	400.305	0.7976	1.0767	0	0	6.4627	6.6467	6.4707	6.6456	6.6894	6.6083	6.0723	6.1651	6.1027	6.2812	6.0886	5.9989
metab_429	pos_432	444.331	0.9556	1.1057	0	0	6.6855	6.9484	6.7243	6.913	6.8451	6.8245	6.1278	6.1545	6.1651	6.3354	6.1487	6.0968
metab_430	pos_433	297.242	0.503	1.045	0.028	0.0422	6.3375	6.4081	6.1375	6.3401	6.1897	6.3516	6.1281	5.9426	6.1607	6.229	6.0963	5.5832
metab_432	pos_435	437.324	0.9754	0.8618	0.0019	0.0042	5.0814	5.4436	4.7407	5.3486	5.1423	5.6486	6.0209	6.7739	5.7009	5.7895	6.1008	6.049
metab_433	pos_436	252.232	0.4322	1.032	0.019	0.0299	6.4885	6.4384	6.1367	6.3344	6.1633	6.2041	6.0005	6.1991	6.0292	6.1275	6.19	6.0474
metab_434	pos_437	515.318	0.8854	1.1059	0.0002	0.0007	7.0192	6.6509	6.7039	6.5172	6.5055	6.5048	6.15	5.9971	5.7147	6.1515	5.8551	6.212
metab_435	pos_438	321.242	2.0295	2.1609	0	0.0002	5.6651	6.3115	5.2727	6.2758	5.6126	5.596	3.2856	3.9467	1.5844	2.1235	1.6987	3.4325
metab_436	pos_439	278.247	0.3668	1.0215	0.0225	0.0349	7.0553	6.9674	6.8037	6.9082	6.7911	6.8163	6.6387	6.8133	6.6682	6.7936	6.8241	6.734
metab_437	pos_440	520.339	1.2152	0.864	0.0001	0.0003	7.4393	7.4956	7.3413	7.2553	7.0585	7.0882	8.2678	8.1113	8.9097	7.868	8.8153	8.5868
metab_438	pos_441	374.232	1.6068	1.4511	0.0002	0.0007	5.8819	6.767	5.5716	7.4812	7.4121	6.2756	5.2666	4.4949	4.5937	4.4872	4.1706	4.1285
metab_439	pos_442	502.373	0.7133	1.068	0.0006	0.0015	6.3265	6.6334	6.3267	6.5385	6.1861	6.6117	6.1393	6.0235	6.1222	5.9087	5.9997	5.966
metab_441	pos_444	363.287	1.8441	1.6599	0	0	6.2882	6.4373	5.8249	6.3336	6.2993	6.3223	4.6991	3.8576	2.9851	4.1045	3.5037	3.445
metab_442	pos_445	501.355	1.4499	1.3027	0	0	6.4512	6.8074	6.1536	6.657	6.349	6.8509	5.0342	5.1029	4.7143	4.9337	5.1874	5.1709
metab_444	pos_447	481.365	0.6639	0.9334	0.0191	0.0301	6.7522	6.9053	6.3352	6.6537	6.597	6.6378	7.0821	7.8339	6.7376	7.0276	6.9913	7.0514
metab_445	pos_448	348.287	0.6472	1.0648	0.0005	0.0013	5.9883	5.7471	5.5757	5.8456	6.0008	5.769	5.442	5.4501	5.3956	5.5466	5.5242	5.4423
metab_447	pos_450	153.127	0.0307	0.9961	0.904	0.9201	5.2563	5.2591	5.0729	5.1051	5.0999	5.1196	4.969	5.0643	5.9542	4.9766	5.0259	5.0422
metab_451	pos_454	513.355	0.7648	1.0885	0.0148	0.0241	7.2773	7.4674	6.5851	7.3289	7.0448	7.1834	6.2777	7.2564	6.6831	6.533	6.3295	6.3243
metab_452	pos_455	473.361	1.0075	1.1621	0.0032	0.0063	6.6249	6.8784	5.6847	6.7048	6.2063	6.5704	5.2665	6.2706	5.5064	5.5485	5.3141	5.3701
metab_453	pos_456	147.117	0.4928	1.0401	0.0041	0.0079	5.7848	5.8437	5.5495	5.6969	5.5785	5.6448	5.3864	5.6331	5.4139	5.4418	5.4731	5.4374
metab_454	pos_457	285.184	1.7659	1.5927	0	0	6.0154	6.5872	5.5934	6.2747	6.3298	6.3624	3.4151	3.5227	4.739	4.2285	4.0147	3.4159
metab_455	pos_458	455.351	0.896	1.1132	0.0026	0.0053	7.0399	7.2667	6.3918	7.0721	6.6641	6.8744	6.0134	6.7138	5.9063	6.2591	6.2149	6.0036
metab_456	pos_459	681.396	1.6864	0.7096	0	0.0001	5.9615	5.568	4.7781	4.4829	5.6733	4.5641	6.8799	7.5338	7.1662	7.1663	7.7226	7.2517
metab_457	pos_460	439.356	0.2826	1.0238	0.3493	0.4002	7.1269	7.4414	6.9027	7.1742	6.984	7.1299	6.8526	7.685	6.6294	6.9214	6.8855	6.7912
metab_458	pos_461	280.263	0.383	1.0187	0.0166	0.0267	8.4817	8.44	8.2074	8.3295	8.2051	8.2664	8.0836	8.2303	8.1307	8.1755	8.2229	8.1709
metab_459	pos_462	511.339	1.0863	1.1825	0.0023	0.0049	6.6335	6.8971	5.9341	6.7364	6.585	6.5123	5.3756	6.3365	5.797	5.6821	5.1644	4.8782
metab_460	pos_463	483.344	1.1911	1.1703	0	0.0001	7.2929	7.6377	6.9233	7.5424	7.473	7.7484	6.1661	6.1497	6.6093	6.3193	6.5659	6.3164
metab_461	pos_464	198.185	0.3801	1.0258	0.0202	0.0316	6.2699	6.2508	5.9901	6.122	5.9967	6.055	5.8736	6.0265	5.9087	5.9732	6.0144	5.9651
metab_462	pos_465	429.372	1.2675	1.248	0.0003	0.0008	6.3504	6.6186	6.0558	6.4184	6.3841	6.5122	5.6654	5.7648	4.4087	4.9143	5.2593	4.7067
metab_464	pos_467	483.344	1.6473	1.3682	0	0	7.3624	7.6789	6.771	7.477	7.0821	7.397	5.7951	5.5208	5.0647	5.4798	5.3645	4.7679
metab_466	pos_469	439.356	0.6644	1.0629	0.0126	0.0209	7.2609	7.5148	6.8951	7.3339	7.0392	7.1579	6.6884	7.2951	6.5975	6.7913	6.6662	6.6065
metab_467	pos_470	354.336	0.6186	1.0584	0.002	0.0043	5.9574	6.1842	6.0229	6.1265	6.0888	6.2813	5.8228	5.6111	5.6465	6.0366	5.8553	5.6636
metab_468	pos_471	648.382	0.6202	1.1611	0.2512	0.2982	4.5259	4.7038	7.0039	4.1709	3.8844	4.7184	3.7108	5.1376	3.3852	3.4298	4.9171	4.4024
metab_469	pos_472	189.163	0.5051	1.0367	0.0025	0.0051	6.2329	6.3404	6.1353	6.2581	6.082	6.2152	5.9249	6.1807	5.9102	5.962	5.9845	5.9859
metab_470	pos_473	579.386	1.6557	1.3839	0	0	6.7006	7.3319	7.2417	6.9358	7.2718	6.9155	4.4862	5.3883	5.1394	5.1389	5.3722	5.1128
metab_471	pos_474	282.278	0.4138	1.0174	0.0023	0.0049	8.9283	8.955	8.8029	8.8404	8.7703	8.8815	8.6187	8.7778	8.6726	8.7161	8.7465	8.7365
metab_473	pos_476	467.349	1.0138	1.1296	0.0004	0.0011	7.1706	7.4248	6.7403	7.2648	6.9052	7.2708	6.4604	6.7728	6.0988	6.2299	6.3571	5.9496
metab_474	pos_477	546.435	1.7747	1.5521	0	0	6.2462	6.8345	6.1113	6.6303	6.4522	6.944	4.3283	3.917	3.7661	5.2152	4.2291	3.8101
metab_475	pos_478	471.345	1.3372	1.2544	0	0	6.3494	6.6202	6.1987	6.6082	6.0752	6.7531	4.9003	5.5866	5.0529	5.202	5.1896	4.8417
metab_476	pos_479	189.163	1.009	1.1389	0.0001	0.0002	6.2401	6.5996	6.0167	6.5001	6.0855	6.3421	5.4604	5.861	5.4381	5.4444	5.4683	5.5009
metab_477	pos_480	752.527	1.4071	1.3162	0	0.0002	6.7267	6.4838	5.4383	6.4809	6.3838	6.4981	4.8708	5.2767	4.4163	4.7916	4.7965	4.7257
metab_478	pos_481	465.297	1.8736	1.6555	0	0	6.5434	7.072	5.5157	6.7536	6.223	6.5328	4.0157	3.9716	3.6273	4.1049	4.2248	3.3941
metab_479	pos_482	557.418	0.2108	0.9768	0.3947	0.4467	5.6546	6.0626	6.0068	5.7518	5.9544	5.9089	6.2328	6.616	5.7611	5.8326	6.0683	5.6711
metab_481	pos_484	310.31	0.3755	1.0176	0.0121	0.0203	8.3461	8.237	8.1482	8.2221	8.0811	8.2389	7.9839	8.1356	7.9979	8.0817	8.1544	8.0678
metab_482	pos_485	766.542	1.3722	1.4475	0.0063	0.0114	7.089	6.6375	4.2188	6.7424	4.3442	5.4555	3.9475	4.0552	3.9043	3.9489	4.0212	3.9484
metab_483	pos_486	423.325	1.813	1.5667	0	0	6.4707	6.9271	5.948	6.6723	6.4337	6.426	3.9536	4.1277	4.3559	3.8772	4.6241	3.8766
metab_484	pos_487	561.375	1.5647	1.3515	0	0	6.4677	7.0932	6.8926	6.6187	6.9976	6.6045	4.9516	5.5168	4.989	4.4661	5.3189	4.8559
metab_485	pos_488	485.36	1.4727	1.3329	0	0.0001	6.0276	6.4303	6.7152	6.7121	5.9588	7.3209	4.7322	4.9941	4.5434	5.127	4.9956	4.9926
metab_486	pos_489	377.341	1.8811	2.0151	0.0004	0.0012	6.0213	5.9482	4.4875	6.1805	5.5549	5.4579	4.085	3.756	3.2744	2.9183	1.2745	1.3904
metab_487	pos_490	621.31	0.8209	0.9	0.0199	0.0313	6.424	6.3454	5.9871	7.075	5.619	7.2823	7.0756	7.1821	7.1888	7.2083	7.215	7.1617
metab_489	pos_492	716.4	0.5044	1.0405	0.0088	0.0153	6.5471	6.5023	6.5293	6.4861	6.7793	6.9548	6.3826	6.3751	6.3408	6.447	6.3387	6.3661
metab_490	pos_493	95.0607	0.2272	1.0133	0.1489	0.1866	5.9791	6.037	6.0282	6.0906	5.921	6.1846	5.833	6.0014	6.0056	5.8767	6.0314	6.0177
metab_491	pos_494	99.0556	0.3594	1.0195	0.0164	0.0264	6.8169	6.8574	6.8868	6.95	6.8032	7.0156	6.6915	6.7704	6.7639	6.6403	6.8306	6.8385
metab_492	pos_495	657.442	2.1681	2.0776	0.0001	0.0003	6.7267	6.7474	8.686	6.8468	6.5784	5.5151	4.6219	2.7905	4.246	2.6844	2.7566	2.6839
metab_495	pos_498	689.495	0.5156	0.9544	0.0544	0.0762	7.123	6.7486	7.3624	6.6775	6.8459	6.6833	6.9002	7.5432	6.9946	7.2396	7.3927	7.3513
metab_499	pos_502	188.978	0.5184	1.0338	0.0001	0.0004	6.3454	6.4582	6.3852	6.4262	6.4055	6.5626	6.2	6.2647	6.2476	6.1779	6.1841	6.2502
metab_500	pos_503	164.067	0.5346	1.0346	0.0001	0.0002	6.4795	6.5872	6.4914	6.5693	6.4898	6.6482	6.2897	6.3813	6.3181	6.2747	6.3059	6.3788
metab_501	pos_504	141.983	0.5391	1.0322	0.0001	0.0003	7.1384	7.2583	7.1572	7.2301	7.174	7.3293	6.9494	7.0599	7.0059	6.9476	6.9537	7.0258
metab_502	pos_505	139.988	0.5408	1.0303	0.0001	0.0003	7.5715	7.6915	7.5913	7.663	7.6023	7.7628	7.383	7.4828	7.4399	7.3753	7.3917	7.4594
metab_504	pos_507	182.985	0.6113	1.0385	0	0	7.2922	7.4044	7.3342	7.3907	7.3069	7.4601	7.0976	7.1506	7.0786	7.0412	7.0701	7.1141
metab_506	pos_509	150.996	0.5854	1.0477	0	0.0001	5.4967	5.6137	5.5162	5.6222	5.5339	5.6622	5.2707	5.3638	5.3652	5.2903	5.2862	5.3415
metab_509	pos_512	687.48	0.4482	1.0372	0.0662	0.0908	7.1307	6.9853	7.033	6.8956	6.8615	6.7296	6.3241	7.0231	6.4595	6.736	6.8904	6.705
metab_510	pos_513	667.454	0.8624	1.1111	0.0041	0.0079	6.6926	6.6562	6.8878	6.3626	6.5179	6.1429	5.4207	6.4775	5.945	5.8598	5.8868	5.7411
metab_512	pos_515	499.375	0.8032	1.0953	0.008	0.014	7.327	7.4339	6.4189	7.3282	6.7507	6.9564	6.3297	6.795	6.3037	6.5749	6.3036	6.2356
metab_513	pos_516	563.55	0.2109	1.017	0.3283	0.3792	6.4008	6.1303	5.9792	5.9541	5.848	5.8704	5.768	6.0923	5.8176	5.997	6.003	5.8979
metab_514	pos_517	629.438	0.6747	1.0815	0.0234	0.0361	6.7054	6.4801	6.8284	6.564	6.7456	6.6589	5.5258	6.4013	5.6754	6.5486	6.3437	6.4753
metab_515	pos_518	428.324	1.6291	1.5026	0	0	5.8076	6.3178	5.2944	5.9968	5.5124	6.3565	4.2333	3.8699	3.4418	3.8372	4.4403	3.6621
metab_516	pos_519	254.247	0.3846	1.0228	0.0239	0.0368	7.4264	7.3321	7.1213	7.2324	7.0801	7.1608	6.9577	7.1155	7.0312	7.0733	7.1475	7.0611
metab_517	pos_520	414.321	1.0469	1.135	0	0.0001	6.5428	6.8959	6.7145	6.8948	6.473	7.0332	6.1113	6.0563	5.9546	5.9214	5.8236	5.8647
metab_519	pos_522	324.289	0.0028	1.0006	0.9847	0.9871	7.3875	6.7168	7.5563	6.8626	7.2352	6.6468	7.0501	7.046	6.6773	7.4663	7.131	7.0124
metab_520	pos_523	489.318	1.4903	1.3383	0	0.0001	6.7647	6.5785	6.4802	6.4924	6.3056	6.2599	4.5451	5.462	4.8963	4.8832	5.2239	4.041
metab_521	pos_524	305.247	0.802	1.0932	0.0002	0.0005	5.847	6.0173	5.8215	5.843	5.7782	5.7499	5.3251	5.554	5.1683	5.5951	5.2142	5.2133
metab_522	pos_525	435.25	0.0648	1.0124	0.8667	0.8876	5.6497	5.6488	5.3082	5.3713	5.0379	5.2715	3.5429	5.7652	5.1676	5.7121	5.8654	5.8395
metab_523	pos_526	383.203	0.0902	1.0037	0.4674	0.5192	6.5357	6.5122	6.5547	6.6101	6.4968	6.6403	6.439	6.533	6.5908	6.5243	6.5178	6.5961
metab_524	pos_527	387.216	1.4988	1.4492	0.0002	0.0006	6.4688	5.898	5.6616	5.8354	5.4931	5.3901	3.2818	3.7368	4.7611	3.2832	4.7309	4.182
metab_526	pos_529	437.341	0.8492	1.0941	0.0045	0.0085	7.627	7.8844	7.2046	7.7357	7.4778	7.6925	7.0146	7.5504	6.4143	7.0209	6.7903	6.9115
metab_527	pos_530	278.247	0.1509	1.0069	0.2969	0.3464	7.1284	6.964	6.9631	7.0151	6.9176	7.0024	6.8536	7.0511	6.8837	6.9287	7.0363	6.947
metab_528	pos_531	520.339	0.7654	0.9371	0.0016	0.0035	7.6629	7.6686	7.2831	7.5066	7.1665	7.3123	7.7459	7.7519	8.1492	7.7796	8.0541	8.113
metab_529	pos_532	419.24	1.5041	1.3325	0	0	6.6323	6.4363	6.6819	6.394	6.7555	6.3614	5.041	5.2	4.5511	5.1637	4.4881	5.0244
metab_530	pos_533	677.371	1.3029	0.8187	0	0	5.9595	5.6406	5.5943	5.9527	5.8136	5.0777	7.0017	6.6646	7.1058	6.9847	6.8104	7.0053
metab_531	pos_534	497.288	1.1957	1.2566	0.0016	0.0034	6.3414	6.2261	5.5677	6.2737	6.0574	5.9385	4.8855	4.7012	5.3626	3.6218	5.3533	5.0408
metab_532	pos_535	335.151	0.5634	1.0557	0.0159	0.0256	6.1698	5.8879	6.2474	5.9692	6.0937	6.0426	5.6408	6.1042	5.503	5.9672	5.5677	5.7047
metab_533	pos_536	627.334	1.4593	0.7807	0	0.0001	6.1506	5.7544	6.1496	5.4171	5.7551	5.0088	7.3008	7.0558	7.6344	6.9317	7.5793	7.3496
metab_534	pos_537	473.326	1.5106	1.2814	0	0	7.2614	7.5856	6.9925	7.524	7.2517	7.3943	5.7073	5.7878	5.578	5.7027	5.7877	5.7797
metab_535	pos_538	365.268	1.0417	1.1505	0.0001	0.0002	6.3421	6.4164	5.9918	6.5619	6.7102	6.4591	5.4476	5.8121	5.3053	5.6625	5.7128	5.5071
metab_536	pos_539	237.221	1.2618	1.2505	0	0	5.5016	5.8116	5.5371	5.6739	5.6102	5.5936	4.5483	4.5566	4.2158	4.6449	4.501	4.5018
metab_537	pos_540	391.245	0.116	1.0078	0.7498	0.7837	7.3074	7.4492	8.3431	7.3386	7.2838	7.4149	7.3609	7.7287	7.3135	7.5128	7.439	7.4349
metab_538	pos_541	340.284	0.5265	1.0488	0.0239	0.0368	6.1554	6.2217	6.32	6.2374	6.2712	6.4662	6.0498	6.0454	5.7943	6.3463	6.0537	5.632
metab_539	pos_542	275.2	0.7875	1.0727	0.0001	0.0002	7.0995	6.9686	7.1803	6.9408	6.8985	6.959	6.4204	6.6546	6.3287	6.6297	6.5221	6.6426
metab_540	pos_543	331.187	0.7002	1.0679	0.003	0.0061	6.8244	7.1137	6.9949	6.9289	6.9941	6.8777	6.3093	6.5662	6.6391	6.1725	6.4884	6.9104
metab_541	pos_544	537.302	0.1836	1.019	0.563	0.611	7.0013	6.2982	7.1999	6.2441	6.1072	6.178	6.574	6.2328	6.3515	6.512	6.1807	6.4517
metab_542	pos_545	498.378	0.4613	1.0506	0.166	0.2059	6.8838	7.1904	6.4533	7.3876	6.8128	7.2392	6.7056	6.9455	6.1167	6.443	7.3246	6.4148
metab_543	pos_546	407.291	0.6545	1.062	0.0042	0.0081	6.5655	6.7006	6.56	6.7857	6.5839	6.68	6.2317	5.9907	6.6091	6.1278	6.4895	6.0966
metab_544	pos_547	265.216	0.9604	1.1294	0.0001	0.0004	6.1939	6.0557	6.4601	6.0541	6.077	6.0693	5.367	5.8355	5.3206	5.6426	5.2634	5.2523
metab_545	pos_548	343.226	1.2605	1.2087	0	0	6.4932	6.7978	6.4159	6.6674	6.4179	6.5472	5.5288	5.7681	5.3301	5.3549	5.1867	5.3799
metab_546	pos_549	261.221	0.0071	0.9997	0.9801	0.9835	6.7905	6.7367	7.0673	6.6882	6.5966	6.6613	6.6992	6.8976	6.5576	6.759	6.8982	6.7421
metab_547	pos_550	241.195	1.0178	1.1558	0	0	5.4911	5.6006	5.7451	5.5083	5.4548	5.5444	4.8417	5.1341	4.5911	4.8153	4.7272	4.7402
metab_548	pos_551	701.371	1.3084	0.833	0	0	6.5631	6.7969	6.1107	6.3884	5.9253	6.1266	7.771	7.2845	7.6792	7.5813	7.6635	7.5391
metab_549	pos_552	445.293	1.5006	1.3225	0	0	6.6499	7.0408	6.3563	6.9504	6.6101	6.8691	5.0163	5.7378	5.0517	5.2065	4.5355	5.056
metab_550	pos_553	365.231	1.0454	1.1408	0	0	6.3268	6.5739	6.646	6.4847	6.3671	6.725	5.505	5.8376	5.8382	5.4803	5.7777	5.8589
metab_551	pos_554	485.325	1.5507	1.3206	0	0.0001	7.3731	7.6561	6.8101	7.5229	7.2674	7.3901	5.4526	6.367	5.1927	5.8707	5.1861	5.2641
metab_552	pos_555	863.499	1.4626	1.3837	0.0005	0.0013	5.9953	6.1672	5.3272	6.8354	6.4085	7.1754	4.5066	5.4331	3.7261	4.597	4.7242	4.4081
metab_553	pos_556	505.351	1.238	1.2129	0	0.0001	6.116	6.6836	6.4711	6.4821	6.4508	6.4168	5.5444	5.5453	5.5536	5.4393	4.9218	4.8369
metab_554	pos_557	232.133	0.471	1.0515	0.067	0.0917	5.2881	5.6211	5.5372	5.4082	5.5602	5.1874	5.284	5.2389	4.994	5.0622	5.5973	4.8295
metab_555	pos_558	468.308	0.5732	0.9475	0.0173	0.0276	6.0204	6.3333	5.9656	6.2285	5.9662	6.0803	6.1215	6.3231	6.5776	6.2199	6.7139	6.6637
metab_556	pos_559	334.235	0.8606	1.1024	0	0	5.8775	5.6118	5.8482	5.7149	5.7014	5.7276	5.2901	5.2167	5.1726	5.1828	5.1602	5.2556
metab_557	pos_560	431.278	1.0064	1.1529	0.0006	0.0016	6.3502	6.3859	5.9155	6.2849	6.1398	6.3359	5.3513	6.0903	4.9804	5.4903	5.2517	5.286
metab_558	pos_561	571.359	0.1115	1.0145	0.8344	0.8596	4.3656	5.5526	5.2172	5.9626	5.188	6.7654	5.4767	6.0264	5.5343	5.0325	5.5021	5.0098
metab_559	pos_562	249.185	1.1884	1.1955	0	0	6.0743	6.114	5.9399	6.1163	6.1281	6.1043	5.1333	5.3485	5.0035	5.0689	5.0494	4.9049
metab_560	pos_563	380.279	0.1081	1.0079	0.6529	0.6938	6.2205	6.4207	6.5007	6.3792	6.1746	6.4604	6.2291	6.4139	6.1128	6.6538	6.0315	6.4144
metab_561	pos_564	316.19	1.521	0.661	0.0005	0.0012	3.852	3.9433	3.9138	4.0332	3.6616	3.0933	6.5398	5.0069	6.4656	6.3446	4.9324	4.7463
metab_562	pos_565	451.32	1.28	1.222	0.0002	0.0006	7.0044	7.4784	6.4785	7.2493	7.0636	7.2581	5.8084	6.5123	5.1892	5.8824	5.6924	5.7188
metab_563	pos_566	409.272	1.3094	1.2534	0	0.0001	6.3494	6.6838	5.9375	6.6299	6.2346	6.5341	5.0741	5.5238	4.6095	4.8998	5.4238	5.0837
metab_564	pos_567	305.211	1.0823	1.1598	0	0.0002	6.2363	6.4892	6.2952	6.3941	6.2908	6.3078	5.5074	5.6444	5.9062	5.405	5.1071	5.207
metab_565	pos_568	469.294	1.5215	1.3405	0	0	6.5098	6.7018	6.1831	6.6643	6.3462	6.5976	4.6746	5.3277	4.5858	4.976	4.9123	4.6165
metab_566	pos_569	429.299	1.5844	1.4066	0	0	6.3569	6.6692	5.9047	6.6574	6.3108	6.6024	4.4348	4.9659	4.4838	4.7897	3.8071	4.8888
metab_567	pos_570	423.236	0.6364	1.0866	0.0302	0.0452	5.4168	5.1311	6.0754	5.3889	5.4486	6.0488	5.3304	5.2555	4.8642	4.9524	5.2981	5.1392
metab_568	pos_571	269.174	0.8246	1.1099	0.0052	0.0097	5.7708	6.1816	6.5454	5.9322	5.8648	5.999	5.2437	5.9941	5.1446	5.5395	5.4679	5.3102
metab_570	pos_573	417.313	1.2407	1.3264	0.0104	0.0177	5.9649	6.5487	4.8565	6.4138	6.431	6.4587	5.5528	5.6116	3.5378	5.2751	3.6547	4.0178
metab_571	pos_574	353.268	0.7465	0.9313	0.0008	0.0019	6.439	6.4999	6.5981	6.3725	6.1954	6.3043	6.9897	6.8246	6.6303	6.7999	7.2056	6.7969
metab_572	pos_575	638.329	0.9069	0.8839	0.0049	0.0092	5.4718	6.2828	5.0603	6.0283	5.6259	5.7944	6.5194	6.0686	6.5615	6.2155	6.8462	6.5577
metab_573	pos_576	503.336	0.9948	1.1433	0.0004	0.001	6.2561	6.513	5.9821	6.4529	6.2851	6.3634	5.6922	5.992	5.0516	5.5656	5.4373	5.3718
metab_574	pos_577	432.331	0.6879	1.0937	0.0193	0.0303	5.2158	5.4367	5.9042	5.3831	5.2482	5.7347	4.8262	5.5519	4.6774	5.1251	5.0594	4.8615
metab_575	pos_578	411.271	1.2267	0.8461	0	0.0001	6.0903	6.3737	6.4918	6.3399	6.1758	6.4254	7.6937	7.5867	7.0431	7.1149	7.9461	7.4079
metab_576	pos_579	359.187	0.7914	0.902	0.0017	0.0037	5.0108	5.2241	5.0596	5.0748	5.06	4.9435	5.4944	5.8891	5.1081	5.8739	5.7975	5.5074
metab_577	pos_580	307.19	1.0905	1.1318	0	0	7.2792	7.1823	7.3902	7.1463	7.2051	7.1769	6.2493	6.5337	6.2662	6.4384	6.4296	6.4115
metab_578	pos_581	311.221	0.6302	1.0489	0.0006	0.0016	6.9021	6.986	7.0795	6.8886	6.8721	6.9405	6.476	6.7932	6.5537	6.4838	6.637	6.7823
metab_579	pos_582	380.277	0.3859	0.9705	0.0788	0.106	6.1826	6.108	6.0302	6.1871	6.131	6.2937	6.2713	6.3371	5.9681	6.4552	6.6054	6.4121
metab_580	pos_583	387.215	1.0455	1.1491	0	0	5.7737	5.9731	5.945	5.9821	5.8229	6.0137	5.0943	5.2492	5.101	5.0556	5.2523	5.1489
metab_581	pos_584	503.298	1.517	1.358	0	0	6.0349	6.3614	5.797	6.3223	6.0693	6.3355	4.5771	4.7009	4.4833	4.5495	4.5009	4.3768
metab_582	pos_585	597.361	1.4566	1.3534	0.0001	0.0002	5.8585	5.9532	6.9658	5.9307	6.164	5.8729	4.0559	4.6584	4.6774	4.5647	5.1345	4.0568
metab_583	pos_586	131.085	1.0927	1.1631	0	0	5.9607	6.2533	5.8634	6.1574	6.0236	6.1638	5.1645	5.3775	5.1783	5.1474	5.2883	5.1582
metab_584	pos_587	81.0703	0.9076	1.119	0	0	5.3982	5.5698	5.5096	5.4754	5.3662	5.5101	4.8674	4.9691	4.7958	4.8423	4.9555	4.9129
metab_585	pos_588	580.368	0.9596	0.84	0.0243	0.0373	5.4033	4.1596	4.3393	4.4832	6.2872	4.8756	5.6276	5.8237	6.5195	5.7269	5.658	5.8228
metab_586	pos_589	313.237	0.3293	1.0228	0.1138	0.1471	6.6639	6.789	6.4985	6.706	6.5119	6.6809	6.3945	6.8047	6.3008	6.5267	6.5287	6.4063
metab_587	pos_590	453.246	0.6692	1.1034	0.0477	0.0678	5.3089	5.3213	6.3588	5.4486	5.8759	5.4305	4.4395	5.4001	5.0561	4.9127	5.2423	5.5335
metab_588	pos_591	442.316	0.5624	0.9448	0.0318	0.0472	5.5845	5.9077	5.756	6.049	6.4427	6.2837	6.4792	6.3796	6.3947	6.1538	6.4506	6.2705
metab_589	pos_592	349.198	0.9523	1.0993	0	0	7.0883	7.1659	7.0678	7.1299	7.0641	7.196	6.3324	6.6135	6.4534	6.4221	6.5395	6.4946
metab_590	pos_593	423.274	0.5834	0.943	0.0371	0.0542	6.1912	6.6088	5.9593	6.4825	6.2347	6.557	6.6313	6.7602	6.4102	6.4258	7.1766	6.926
metab_592	pos_595	379.247	0.7846	1.0863	0.0004	0.0012	5.8398	6.271	6.0776	6.2182	5.9231	6.296	5.5611	5.8801	5.5328	5.6199	5.5923	5.5285
metab_593	pos_596	300.289	1.1778	1.1625	0	0	6.8352	7.0372	7.0938	7.0041	6.7331	7.0148	6.0176	5.9581	5.9758	5.9071	6.0005	6.0284
metab_594	pos_597	287.091	1.228	1.4865	0.0264	0.0401	3.6945	3.7846	3.7485	6.3344	7.2685	5.8066	3.3656	3.746	3.3224	3.367	3.4433	3.3665
metab_595	pos_598	249.148	1.0561	1.1525	0.0001	0.0004	6.5578	6.6037	6.4273	6.5398	6.3991	6.4794	5.8462	5.386	6.0578	5.8397	5.5405	5.1772
metab_596	pos_599	226.18	0.038	0.9979	0.8406	0.8652	6.4172	6.5368	6.3989	6.6765	6.5036	6.7314	6.5747	6.5308	6.5804	6.395	6.6167	6.6487
metab_597	pos_600	235.169	0.3951	1.0292	0.0657	0.0901	6.7049	6.5572	6.8777	6.541	6.3588	6.4707	6.3196	6.4608	6.3563	6.6205	6.3564	6.2769
metab_598	pos_601	401.159	1.2107	1.1771	0	0	6.7048	6.8275	7.0024	6.949	7.023	6.737	5.7511	6.0763	5.7988	5.9391	5.8411	5.6344
metab_599	pos_602	235.132	0.7252	1.0863	0.0038	0.0074	5.693	5.7567	6.0126	5.7351	5.662	5.7372	5.3329	5.2745	5.7902	5.3259	5.1458	4.9785
metab_600	pos_603	432.259	1.0196	1.1638	0.0007	0.0017	6.1194	6.1803	6.1474	5.9645	5.6618	6.0728	5.2583	4.9883	5.5441	5.6829	4.8024	4.7775
metab_601	pos_604	189.127	0.9345	1.1143	0	0	6.0298	6.2227	6.1034	6.112	5.9309	6.1712	5.4763	5.4742	5.4232	5.3573	5.6229	5.4673
metab_602	pos_605	314.268	1.5172	1.3027	0	0	7.1248	7.5466	6.5746	7.5109	6.9814	7.4631	5.7325	5.7365	5.5975	5.3525	5.5235	5.2219
metab_603	pos_606	217.086	1.1379	1.1849	0	0	5.9759	6.1172	5.9248	6.0723	6.0804	6.018	4.9383	5.5631	5.016	4.8706	5.1629	4.9914
metab_604	pos_607	207.065	1.43	1.2582	0	0	6.7274	6.8999	7.0834	6.971	6.8815	6.9879	5.4504	5.6886	5.3895	5.5324	5.5368	5.4269
metab_605	pos_608	524.315	1.291	1.2901	0.0017	0.0037	7.7664	6.5457	5.6708	7.0666	5.8121	5.9668	5.0923	4.966	4.8461	5.349	4.9899	4.8538
metab_606	pos_609	301.107	1.4893	1.3027	0	0	6.525	6.7465	6.7417	6.7764	6.6741	6.5093	5.1256	5.4662	4.908	5.0318	5.2127	4.9411
metab_607	pos_610	219.138	0.754	1.077	0.0008	0.0019	6.6464	6.4492	6.5661	6.4089	6.2373	6.2951	5.8046	6.1667	6.1096	5.919	6.1055	5.7401
metab_608	pos_611	439.268	0.938	0.8762	0.0016	0.0034	5.0554	5.6243	5.2128	5.5877	5.4544	5.5911	5.9015	6.7176	5.6646	6.2155	6.2461	6.3767
metab_609	pos_612	442.264	0.4423	1.0447	0.0707	0.096	5.5539	5.698	5.758	5.5176	5.3968	5.7033	5.4811	5.3222	5.5081	5.0262	5.7155	5.1396
metab_610	pos_613	556.166	1.0238	0.8543	0.0042	0.008	5.3583	5.3901	5.2997	5.3959	5.9695	6.012	7.1182	6.5656	5.964	6.2079	7.2101	6.0622
metab_611	pos_614	285.112	0.9571	1.1186	0.0002	0.0006	6.5936	6.8957	6.5032	6.9066	6.9087	6.4409	5.8566	6.3842	5.8725	5.9424	6.0967	5.8279
metab_612	pos_615	237.185	0.8141	1.0887	0.001	0.0023	6.6483	6.9132	6.8625	6.5574	6.2455	6.3957	6.0819	6.0662	6.1851	6.1824	6.0153	5.8667
metab_613	pos_616	221.19	0.0736	1.0076	0.7881	0.8191	6.8487	5.8776	6.4767	6.3417	6.6253	5.992	6.3431	6.1587	6.5882	6.4996	6.2838	5.9977
metab_614	pos_617	289.091	0.1583	1.0161	0.619	0.6626	6.664	6.2167	6.2043	6.3425	6.3253	6.495	6.5697	6.6017	5.8791	5.9456	6.8441	5.8015
metab_615	pos_618	674.265	0.9062	0.804	0.0619	0.0854	4.4279	5.0778	2.1972	4.7529	4.461	4.0659	5.5526	5.0255	5.1405	5.9412	5.251	4.1634
metab_616	pos_619	505.221	0.8664	0.8829	0.0078	0.0138	5.5211	5.9586	5.3502	5.5172	6.0459	4.7314	6.0354	6.747	6.1144	6.0756	6.2961	6.2476
metab_617	pos_620	777.308	0.6936	0.9311	0.0127	0.0211	6.5026	6.9726	6.174	6.7309	6.8716	6.2613	6.8973	7.3961	6.951	6.8396	7.2662	7.0862
metab_618	pos_621	399.141	0.8881	1.1259	0.0026	0.0053	5.8546	6.1089	5.8139	6.3952	6.6561	6.1953	5.698	5.8093	5.6502	5.2178	5.1439	5.3684
metab_619	pos_622	170.072	0.016	0.9979	0.9124	0.9271	5.191	5.3693	5.2999	5.21	5.0777	5.3005	4.9513	5.3529	5.2029	5.2681	5.5582	5.1776
metab_620	pos_623	157.065	0.6114	0.9417	0.0026	0.0053	5.4966	5.3351	5.3085	5.3005	5.3044	5.2383	5.3998	5.7586	5.6034	5.6582	5.9475	5.5968
metab_621	pos_624	614.248	0.278	0.9749	0.3264	0.3773	6.5132	6.5125	6.0271	6.5259	6.4781	6.5588	6.0976	6.7945	6.5408	6.5888	7.1165	6.4758
metab_622	pos_625	143.085	0.7209	0.931	0.0004	0.0012	5.8447	5.7247	5.6752	5.6283	5.6289	5.6662	5.8422	6.2207	6.0771	6.1329	6.3916	6.0396
metab_623	pos_626	141.07	0.1679	1.0122	0.4201	0.4725	5.832	6.0304	5.8362	5.9578	5.794	6.0047	5.5848	5.9443	5.7994	5.8342	6.1164	5.7511
metab_624	pos_627	309.111	1.3876	1.2822	0	0	6.053	6.4288	6.2051	6.3867	6.215	6.3842	4.928	5.2148	4.7706	4.4084	5.0205	5.0415
metab_625	pos_628	295.188	0.3673	1.0386	0.243	0.2893	6.085	5.9551	6.8282	5.9499	5.7951	5.6906	6.1607	5.8792	5.7491	5.7856	5.7435	5.6368
metab_626	pos_629	201.127	0.2409	0.9765	0.3307	0.3815	6.3618	5.8444	5.9538	5.9328	5.8485	5.8899	5.8965	6.5193	6.2229	6.1683	6.183	5.7031
metab_627	pos_630	326.232	1.7734	1.5587	0	0	6.1518	6.3597	5.9563	6.2078	6.1792	6.3725	4.4252	3.7946	4.3097	3.9089	3.7607	3.6878
metab_628	pos_631	203.179	0.0088	1.0005	0.9888	0.9904	6.9661	6.122	6.8182	6.42	6.4118	6.0032	6.4448	6.2643	6.7698	6.6654	6.451	6.1305
metab_629	pos_632	219.138	0.3156	1.0309	0.2681	0.3161	6.3527	5.9054	6.1348	5.9002	5.7909	5.7004	5.4778	6.2443	5.8576	5.8456	5.8146	5.4671
metab_630	pos_633	191.143	1.0619	1.1567	0	0	6.3421	6.0835	6.2124	6.1212	6.2216	6.0466	5.136	5.4338	5.4947	5.0156	5.5671	5.3657
metab_631	pos_634	424.127	0.6536	1.0948	0.0628	0.0865	5.7959	5.7789	6.9183	5.5469	5.6566	5.3602	5.0963	5.3374	5.4072	5.646	5.4483	5.0881
metab_632	pos_635	266.136	1.0759	1.1655	0	0	5.8292	6.1132	5.8057	5.8505	5.7542	5.8811	4.812	5.1287	5.0494	4.9459	5.1349	5.1563
metab_633	pos_636	627.204	1.3267	1.3693	0.0071	0.0127	5.1568	5.3204	6.8493	5.9447	6.1123	6.5229	3.2573	5.729	3.785	4.9827	4.8871	3.5819
metab_634	pos_637	109.065	0.9683	1.1598	0.0006	0.0015	5.2587	5.4744	6.1315	5.2822	5.1712	5.2968	4.527	4.7813	4.7125	4.5897	4.8262	4.6846
metab_635	pos_638	539.173	0.3716	0.9333	0.3782	0.4293	4.8856	4.2352	5.8079	5.5878	5.9176	3.709	5.0029	5.0267	5.6256	5.6061	5.6648	5.3743
metab_636	pos_639	271.153	1.5109	1.4842	0.0001	0.0002	5.0435	5.3586	5.9139	5.1459	5.4674	5.1815	4.6594	3.4607	3.1575	3.2663	3.2744	3.8152
metab_637	pos_640	361.164	0.8621	0.8981	0.0049	0.0092	6.0499	5.9432	5.6264	6.0519	6.602	5.6239	6.2176	7.0203	6.4917	6.745	6.9009	6.5982
metab_638	pos_641	199.112	0.7792	0.9176	0.0121	0.0203	7.4734	6.6586	7.1373	6.8284	6.5615	6.355	7.0056	7.7072	7.3204	7.5992	7.7088	7.3599
metab_639	pos_642	331.154	0.0356	1.0051	0.9131	0.9275	5.8703	5.9906	5.6118	6.2349	6.903	5.7342	5.7904	6.7894	5.3882	5.7215	6.0949	6.3723
metab_640	pos_643	274.164	0.9797	1.1817	0.0063	0.0114	5.2836	5.5937	6.1017	5.6279	5.4082	5.6973	4.7076	5.0496	4.9124	5.5589	4.168	4.1358
metab_641	pos_644	237.185	0.3754	0.9629	0.1711	0.2115	6.9636	6.468	6.9513	6.4366	6.2767	6.1629	6.7187	6.8588	7.0801	6.8899	6.8707	6.3535
metab_642	pos_645	295.102	1.0554	0.7973	0.0112	0.0189	5.3835	3.6487	4.5455	3.815	4.2602	4.3064	5.2166	5.7833	5.6808	6.2946	5.0108	4.5774
metab_643	pos_646	457.24	0.7077	0.9289	0.0182	0.0289	7.6082	6.7736	7.3747	6.9102	6.931	6.5574	7.4479	7.7198	7.8675	7.4778	7.7145	7.1552
metab_644	pos_647	540.244	1.1191	0.8657	0.0003	0.0007	6.799	6.2457	5.711	6.4802	6.6341	5.976	7.1952	7.275	7.3723	7.0712	7.4432	7.3635
metab_645	pos_648	307.115	1.0987	1.1913	0	0	5.3698	5.6994	5.6052	5.5906	5.9397	5.3192	4.7481	4.5837	4.7583	4.5836	4.5766	4.8871
metab_646	pos_649	464.212	1.1773	0.7738	0.0063	0.0115	4.7663	4.3679	4.8298	4.0062	4.4848	4.1053	5.0841	5.0039	6.3432	5.3979	7.1726	5.3237
metab_647	pos_650	451.136	1.0602	1.3267	0.0726	0.0983	6.4692	4.8587	5.6416	5.7093	5.5591	4.6535	3.9752	5.7483	4.7311	3.6362	5.2188	1.4825
metab_648	pos_651	434.202	0.4261	1.0488	0.155	0.1934	7.104	6.1237	6.3391	6.4497	6.4944	5.8895	6.1082	6.2394	6.0561	5.6584	6.2871	6.2635
metab_649	pos_652	412.217	0.8292	0.8715	0.0397	0.0576	6.4008	5.2236	6.207	5.6245	5.5738	4.2122	5.9958	6.5397	6.4611	6.8616	6.1004	6.1838
metab_650	pos_653	213.112	0.9708	1.133	0	0	5.7365	5.8183	5.7696	5.6752	5.7484	5.5426	5.1124	4.9165	5.1046	5.0793	5.0848	4.9637
metab_651	pos_654	231.101	1.1326	1.1956	0	0.0001	6.2634	5.7538	6.167	5.8016	5.7131	5.5041	4.8325	5.0703	4.7422	4.9761	5.0166	4.8069
metab_652	pos_655	347.112	0.9586	1.1903	0.0181	0.0288	5.7186	5.7745	5.6503	5.7309	5.6645	5.4714	5.6349	5.8426	4.355	4.027	4.5482	4.1659
metab_653	pos_656	589.269	1.4749	0.7286	0.0002	0.0005	5.8029	4.0126	4.8234	4.6494	4.3731	4.0137	5.9867	6.7697	6.3405	6.4591	6.2003	6.2271
metab_655	pos_658	90.9481	0.5396	1.0387	0	0.0001	5.8018	5.9216	5.8631	5.9263	5.8128	5.9816	5.6595	5.6962	5.6449	5.6348	5.6666	5.6932
metab_656	pos_659	111.969	0.5564	1.0385	0	0.0001	6.1049	6.2376	6.1654	6.2198	6.0872	6.2466	5.9599	5.9745	5.9205	5.9137	5.9489	5.9687
metab_657	pos_660	246.862	0.4616	1.0352	0.0009	0.0022	5.1269	5.2977	5.1777	5.1661	5.1703	5.3171	5.1047	5.0595	4.969	4.995	5.0627	4.9999
metab_660	pos_663	188.978	0.5057	1.0462	0.001	0.0024	4.6278	4.7784	4.7487	4.7058	4.6336	4.7798	4.598	4.6204	4.3937	4.4943	4.4706	4.4467
metab_661	pos_664	116.972	0.5746	1.0415	0	0.0001	6.0442	6.1902	6.1281	6.1719	6.0803	6.2415	5.905	5.9437	5.8661	5.8734	5.8878	5.9112
metab_662	pos_665	146.165	1.1616	0.7771	0.0036	0.007	5.2525	4.383	4.9796	4.1841	3.9644	3.1729	5.88	5.4041	5.8472	5.0987	5.7084	5.4404
metab_664	pos_667	263.946	0.6451	1.0608	0	0.0001	5.3111	5.4258	5.4137	5.3293	5.3408	5.522	5.0828	5.1226	5.0624	5.1094	4.9917	5.1155
metab_668	pos_671	354.91	0.424	1.0351	0.0125	0.0209	5.3919	5.2998	5.2015	5.4321	5.3476	5.5191	5.0452	5.3347	5.1514	5.1283	5.217	5.2185
metab_671	pos_674	151.937	0.5707	1.0448	0	0	5.4449	5.5433	5.5072	5.5828	5.4625	5.6063	5.3217	5.3114	5.2753	5.2657	5.2719	5.2752
metab_672	pos_675	252.071	0.5808	1.0392	0	0	6.479	6.5769	6.5285	6.5994	6.476	6.6311	6.2965	6.3503	6.2778	6.263	6.2948	6.3261
metab_673	pos_676	141.983	0.4998	1.037	0.0001	0.0002	5.2084	5.3578	5.328	5.2802	5.2338	5.3654	5.1108	5.1371	5.0732	5.0846	5.1207	5.1142
metab_674	pos_677	139.963	0.5835	1.0391	0	0.0001	6.5893	6.7389	6.6455	6.7085	6.6006	6.7613	6.4343	6.4475	6.3959	6.3907	6.4249	6.4425
metab_675	pos_678	279.159	0.5381	1.0336	0	0.0002	6.6234	6.7399	6.6695	6.7507	6.6381	6.7925	6.4621	6.5142	6.4425	6.4623	6.4928	6.5273
metab_676	pos_679	128.951	0.5623	1.0382	0	0.0002	6.3596	6.5099	6.4564	6.5017	6.3426	6.4972	6.2172	6.2747	6.1649	6.1652	6.2019	6.2257
metab_677	pos_680	125.964	0.5071	1.0422	0.0002	0.0007	4.9066	5.0547	5.0154	4.9644	4.8463	5.0207	4.8022	4.8028	4.6956	4.7617	4.7642	4.7778
metab_678	pos_681	114.967	0.5331	1.0431	0	0.0002	5.1396	5.2283	5.1748	5.2491	5.1058	5.294	5.006	4.9842	4.9846	4.9446	4.976	5.0099
metab_680	pos_683	496.907	0.8288	1.095	0.0008	0.002	6.4733	6.7106	6.7832	6.4547	6.3932	6.4801	6.2282	5.5907	6.0654	6.2083	6.0037	5.787
metab_681	pos_684	251.16	1.3244	0.8143	0	0.0001	5.5204	5.7554	6.1644	5.7551	5.9142	5.7885	7.1673	7.4138	7.2422	6.4809	7.3453	7.2004
metab_683	pos_686	413.212	1.6372	0.7293	0	0	5.0697	5.1023	5.012	5.1082	5.9085	5.0434	7.0698	7.4742	6.9041	6.7204	7.3437	7.3264
metab_684	pos_687	258.963	0.4902	1.0406	0.003	0.006	5.4703	5.5129	5.6423	5.4426	5.5069	5.6792	5.3401	5.2775	5.3207	5.4911	5.1957	5.3298
metab_685	pos_688	147.113	0.796	1.1084	0.0176	0.028	6.4084	6.72	6.0146	6.9262	6.4753	7.1391	5.8805	6.3798	6.4504	5.4352	5.7235	5.9297
metab_687	pos_690	366.862	0.6983	1.0866	0.0057	0.0105	5.2214	6.0234	5.7524	5.5718	5.5439	5.4803	5.1397	4.9121	5.1146	5.2937	5.3538	5.1021
metab_689	pos_692	270.954	0.2622	1.0871	0.706	0.7427	5.5186	4.4252	5.1219	4.881	0.7362	4.3221	5.1217	1.9404	4.6848	4.3153	4.061	2.8741
metab_691	pos_694	406.825	0.7826	1.092	0.0002	0.0007	5.6062	5.959	5.8341	5.6688	5.7692	5.6356	5.2199	5.2353	5.0474	5.5354	5.3369	5.1895
metab_693	pos_696	114.103	0.4461	1.0649	0.1839	0.2254	6.4757	5.9473	4.8941	6.1474	5.3047	5.4766	5.4442	5.3892	5.4171	5.1784	5.2889	5.4448
metab_694	pos_697	132.132	1.5704	1.5682	0	0.0002	6.0258	5.4906	4.321	5.6629	4.8034	4.881	3.2216	3.7418	3.1785	3.223	3.2953	3.2225
metab_695	pos_698	347.121	0.9153	0.8832	0.001	0.0023	4.9789	5.3107	5.2665	5.7503	5.5288	5.7914	6.1407	6.5093	6.2418	5.9119	5.9316	6.209
metab_696	pos_699	610.718	1.0475	1.1788	0.0001	0.0003	5.4668	5.452	5.6131	5.6552	5.6326	5.1708	4.4289	5.0804	4.3909	4.5945	4.6905	4.7996
metab_697	pos_700	253.028	0.9774	0.8695	0.0005	0.0014	4.6701	5.5404	5.439	5.6515	5.1629	5.6876	6.2459	6.1479	6.1704	6.0591	6.1278	6.2259
metab_698	pos_701	334.991	0.9959	0.8638	0.0003	0.0009	4.5011	5.283	5.1157	5.4886	5.0827	5.4707	5.9411	6.0259	5.8856	5.9451	5.9691	6.0553
metab_699	pos_702	382.772	0.8037	0.8815	0.0077	0.0137	5.111	4.307	4.474	4.3128	4.2387	4.2481	5.2152	4.5273	5.3062	5.2465	4.9723	5.0145
metab_700	pos_703	466.734	0.6429	0.8922	0.0981	0.129	5.3164	4.1141	4.146	4.1199	4.33	4.0551	5.1771	3.8601	5.2072	5.0801	5.0752	4.833
metab_702	pos_705	586.875	0.9906	0.8615	0.0003	0.0009	4.6606	4.6932	4.6029	5.3296	5.0577	5.0644	5.5665	5.8566	5.3279	5.8471	5.7065	5.8301
metab_703	pos_706	532.702	0.6508	1.1209	0.1106	0.1435	5.7544	5.7972	6.4347	5.1691	5.6828	4.3099	5.4568	4.211	5.035	5.1664	4.9442	4.7622
metab_704	pos_707	424.92	0.8283	0.8925	0.0013	0.0029	4.8819	5.0835	4.6829	5.1985	4.4227	5.164	5.5713	5.3654	5.6624	5.3747	5.4792	5.527
metab_705	pos_708	114.893	1.4691	1.4923	0.0011	0.0025	5.865	5.7906	6.2856	5.2584	5.4924	4.5159	4.8805	2.8435	2.9909	4.2969	3.7054	3.5374
metab_706	pos_709	209.956	0.855	1.1254	0.0008	0.002	5.1454	5.4511	5.4171	5.6522	5.215	5.5832	5.2218	4.6589	4.508	4.7483	4.8805	4.8282
metab_708	pos_711	76.0398	1.2577	1.4203	0.0007	0.0017	4.197	4.7746	3.3859	4.9441	4.223	5.2173	3.1147	3.2223	3.0715	3.1161	3.1884	3.1155
metab_709	pos_712	162.076	0.1969	1.0168	0.4708	0.5224	6.6616	6.343	7.064	6.9229	7.3236	6.7369	6.6268	6.9349	6.6229	6.5879	6.859	6.7427
metab_710	pos_713	175.119	1.0983	0.8833	0.0001	0.0004	6.7114	7.2865	7.3006	7.4616	7.052	7.689	8.2725	8.2268	8.4158	7.8866	8.1536	8.2925
metab_711	pos_714	175.076	1.2208	0.7765	0.0007	0.0018	3.57	4.7391	4.4866	4.9015	3.7587	5.0916	5.776	5.7267	5.8937	5.3479	5.6403	5.8114
metab_713	pos_716	158.092	0.7237	0.9287	0.0011	0.0026	5.8103	5.7061	6.1315	5.9004	5.777	6.0211	6.4069	6.3253	6.6003	6.0345	6.2851	6.405
metab_716	pos_719	375.127	1.5271	0.7423	0	0.0002	4.1345	4.9324	5.4753	5.4255	5.9898	5.0734	7.145	6.6416	6.9526	7.0418	7.0319	6.9951
metab_717	pos_720	106.05	0.7302	1.1013	0.0133	0.0219	5.7285	5.9472	5.3608	6.1892	5.6399	6.4932	5.0839	5.546	5.43	5.2998	5.2484	5.4996
metab_718	pos_721	133.061	0.6543	1.1073	0.0673	0.092	6.059	5.7166	5.6829	6.1362	5.5858	6.4848	5.8324	4.5681	5.891	4.7847	5.2315	5.9016
metab_719	pos_722	238.118	1.3794	0.7681	0	0	4.4433	4.476	4.3856	4.4818	4.4076	4.417	5.6033	5.6424	5.9556	5.7453	5.5875	6.1125
metab_720	pos_723	457.202	0.8623	0.833	0.057	0.0794	4.4154	4.4481	4.3577	4.4539	4.3797	4.6085	5.9212	5.2639	4.0432	6.6758	4.2993	5.808
metab_721	pos_724	673.335	0.153	1.0089	0.3045	0.3542	6.5038	6.5365	6.4461	6.5423	6.4681	6.4775	6.5813	6.2825	6.3707	6.4446	6.3757	6.5817
metab_722	pos_725	104.107	0.4103	1.0185	0.0017	0.0037	7.7286	7.7597	7.9217	7.7901	7.8124	7.7695	7.6341	7.6707	7.5862	7.674	7.7249	7.6405
metab_723	pos_726	337.171	1.7164	0.7677	0	0	6.475	6.5692	7.0378	7.0633	7.5272	6.9638	9.13	8.9806	8.8998	8.9987	9.0447	9.179
metab_724	pos_727	120.066	1.0331	1.1356	0	0.0001	6.4446	6.6545	6.6868	6.7345	6.3898	6.9383	5.7978	5.8332	5.9206	5.7464	5.7113	6.0783
metab_726	pos_729	340.179	1.3227	0.7772	0.0001	0.0004	4.4934	5.3218	4.2106	5.287	4.2326	5.3153	6.3076	6.1211	6.0627	6.127	6.2004	6.3143
metab_727	pos_730	258.11	1.1071	0.868	0.0002	0.0005	6.5126	6.3701	5.8383	6.4353	6.0287	6.4032	6.9841	7.2118	7.283	6.7858	7.5651	7.4753
metab_728	pos_731	192.065	0.1618	1.0266	0.6175	0.661	5.4395	5.1583	4.9713	5.4346	5.6665	5.2565	5.4692	4.217	5.9257	4.9307	5.5887	4.9696
metab_730	pos_733	480.182	0.4384	0.9414	0.2034	0.2468	5.0651	4.4546	5.7201	5.2876	5.4399	5.1668	4.9096	5.4168	5.457	5.7759	5.428	6.085
metab_731	pos_734	162.055	0.2805	0.9582	0.4534	0.5056	5.1745	4.409	4.1731	4.2692	4.5907	4.2045	4.7942	4.0095	5.3242	4.2718	5.0109	4.5807
metab_732	pos_735	202.071	0.2677	0.9749	0.349	0.3999	6.1905	5.5183	6.2082	6.1209	6.6372	6.0852	6.0655	6.5395	6.1985	6.2068	6.3342	6.3656
metab_733	pos_736	246.097	0.2518	0.9731	0.4383	0.4907	6.3596	5.6485	7.0264	6.1922	6.6444	5.8716	6.3472	6.3019	6.4238	6.5341	6.4457	6.7316
metab_736	pos_739	310.113	0.8244	0.9101	0.0244	0.0374	6.7678	6.4814	7.1559	7.1828	7.7221	7.0683	7.3578	7.0086	7.7412	8.1813	8.209	8.0654
metab_737	pos_740	481.213	1.773	0.693	0.0001	0.0004	4.4244	4.457	5.5845	6.0344	6.8626	5.689	8.0198	7.7965	7.5613	8.1441	7.9243	8.2487
metab_738	pos_741	256.081	0.4962	0.9565	0.0587	0.0816	6.7627	6.1112	6.7694	6.3693	6.7686	6.1033	6.6994	6.6662	6.806	6.8295	6.7561	6.8977
metab_740	pos_743	116.071	1.0078	0.9056	0	0	7.0742	7.167	7.4111	7.2258	7.1079	7.375	8.0107	8.0111	7.8393	7.7451	8.1326	8.1421
metab_741	pos_744	217.129	0.7931	0.916	0.0004	0.0011	5.5657	5.56	5.7447	5.6262	5.5836	5.6986	6.0303	6.1161	5.9856	6.1769	6.5923	5.973
metab_742	pos_745	257.149	0.1933	1.0344	0.7288	0.7643	4.9905	4.3136	6.5814	4.9054	5.6836	3.6897	4.2785	5.5837	4.627	5.2016	5.1711	4.2983
metab_743	pos_746	388.159	0.7774	0.8766	0.0805	0.108	6.3219	4.7096	4.6193	5.2249	5.6226	4.6507	6.3076	5.5302	4.8267	6.2827	6.1913	6.4021
metab_744	pos_747	174.04	0.9861	0.8757	0.0001	0.0004	5.6185	4.9913	5.5806	5.3554	5.5521	5.1165	5.8945	6.1788	6.3969	6.0338	6.1217	6.1601
metab_745	pos_748	368.154	0.5091	0.9357	0.1403	0.1768	5.7117	4.848	5.9456	5.5764	6.4033	5.3885	5.8771	6.2602	5.6503	6.4337	6.0032	5.9786
metab_746	pos_749	305.134	0.501	1.058	0.1325	0.1683	6.5475	6.1527	7.2475	7.0386	7.6922	6.611	6.5683	6.4275	6.4369	6.4898	6.6859	6.4211
metab_747	pos_750	649.217	0.29	0.9404	0.4666	0.5184	5.2384	4.6136	5.9671	4.6195	4.5453	4.5547	5.0813	5.6345	6.6261	5.1589	4.654	4.2528
metab_748	pos_751	275.123	1.377	1.3491	0.0002	0.0006	5.6656	5.1959	6.1872	5.8938	6.667	5.3084	3.8053	4.3513	4.3293	4.2135	4.8383	4.3437
metab_749	pos_752	95.0131	0.1421	1.0276	0.6829	0.7216	4.7547	4.2976	4.8307	3.5023	4.3709	5.088	3.7462	4.7179	4.8736	4.0459	4.4184	4.3222
metab_751	pos_754	509.147	1.236	0.7587	0.0068	0.0122	4.3224	4.355	6.7453	4.3609	4.2867	4.2961	6.1602	5.9437	7.0355	5.7473	6.3267	6.178
metab_755	pos_758	196.097	0.5245	1.0687	0.0622	0.0857	5.1916	5.3356	5.4971	5.1523	5.1795	5.1741	5.1756	5.2257	4.2209	4.9253	4.852	5.1028
metab_756	pos_759	177.007	1.5665	1.4952	0.0001	0.0004	5.7266	6.0713	5.2398	5.8993	5.4627	6.0207	3.5589	4.8095	3.147	4.5883	3.3748	3.5458
metab_757	pos_760	460.202	0.457	0.9544	0.1207	0.1549	6.7138	6.2927	7.2125	6.6664	6.665	6.5983	7.2116	6.8612	7.5568	6.5095	6.9103	7.0156
metab_758	pos_761	240.123	1.0723	0.885	0.0001	0.0003	7.303	6.6774	6.6867	6.7864	6.6767	6.6922	7.6579	7.472	8.0828	7.873	7.5205	7.5247
metab_759	pos_762	349.135	1.7816	0.6543	0	0.0001	4.0762	3.842	5.1075	3.8478	5.3823	4.6368	7.117	6.5147	7.3176	6.6463	6.9765	6.5297
metab_760	pos_763	828.297	0.2645	0.9574	0.4708	0.5224	5.5201	5.0057	6.5281	5.0116	4.9374	4.9468	5.149	5.4745	6.4033	5.6158	5.1859	5.5453
metab_761	pos_764	127.979	1.5471	1.5	0	0	5.1749	5.4742	4.89	5.4234	5.09	5.536	3.1681	4.1895	3.2219	3.8977	3.2418	3.3411
metab_762	pos_765	159.065	0.0245	1.0022	0.8767	0.8963	6.0634	5.6871	5.8595	5.7537	5.9266	5.5959	5.688	5.9367	5.6088	5.801	5.8654	5.9032
metab_763	pos_766	705.184	0.5918	0.8913	0.1472	0.1846	4.6239	4.6565	6.7371	4.6623	4.5881	4.5976	5.881	5.5134	6.2116	5.1868	5.474	5.2458
metab_764	pos_767	851.262	0.1742	1.0211	0.6812	0.7201	5.2229	5.2556	6.4651	5.2614	5.1872	5.1966	4.8939	5.4588	6.0173	5.4438	5.0555	5.0425
metab_765	pos_768	435.134	0.5566	0.9218	0.0797	0.1071	4.9284	4.961	6.1671	4.9668	4.8926	4.9021	5.6675	5.4347	5.8657	5.3467	5.3984	5.7174
metab_766	pos_769	318.129	1.3042	0.7461	0.0007	0.0017	3.6353	3.6679	5.0855	3.9876	4.8581	3.609	5.6678	5.1933	5.5095	5.711	5.3352	5.8843
metab_767	pos_770	418.17	0.5397	0.9114	0.2663	0.3143	6.3555	5.2328	4.5818	5.7431	6.293	4.6444	5.9002	6.6558	4.6697	6.5978	5.6246	6.5943
metab_768	pos_771	381.149	0.5649	0.9143	0.1374	0.1737	5.0884	4.8556	5.7327	4.8706	5.4901	4.8992	5.8116	5.7274	4.4507	5.8218	6.3508	5.669
metab_769	pos_772	1008.36	0.205	0.9504	0.6038	0.6488	4.0537	4.0863	6.0783	4.0921	4.6725	4.0274	4.1067	4.9065	5.6852	5.1253	4.8747	3.7255
metab_770	pos_773	118.086	1.0278	1.12	0	0.0001	7.5765	7.6346	7.1102	7.5802	7.2431	7.7138	6.7616	6.7152	6.7786	6.5069	6.5581	6.7275
metab_771	pos_774	352.069	2.6392	0.0597	0	0	0.3153	0.3325	0.2865	0.3356	0.2973	0.302	5.7673	5.2674	4.3933	4.7664	6.1128	5.0037
metab_772	pos_775	159.013	1.2678	1.2391	0	0.0001	6.1371	6.4696	5.868	6.4005	6.0512	6.5078	4.8707	5.3902	4.6495	5.3222	4.903	5.0715
metab_773	pos_776	267.054	0.8678	0.8442	0.0387	0.0563	4.2645	4.2971	4.2068	4.3029	5.3139	4.2382	5.423	5.0983	3.8923	5.7472	5.4644	5.913
metab_774	pos_777	181.09	0.257	1.0311	0.3018	0.3515	4.8952	5	4.5879	5.0454	4.8739	5.2116	4.729	5.0598	4.3443	4.6884	4.9115	4.9896
metab_776	pos_779	684.255	0.4905	0.929	0.1826	0.224	6.1064	5.3548	7.3154	6.0753	5.721	5.2958	6.3045	6.6752	6.7983	6.2353	6.4186	6.176
metab_777	pos_780	249.045	0.4225	1.0725	0.2658	0.3138	5.2839	4.6868	5.4732	5.2815	5.4537	4.8779	4.6988	5.5688	3.6748	5.233	4.7161	5.0655
metab_778	pos_781	386.043	1.3327	0.7138	0.001	0.0025	3.5426	3.5753	5.5022	3.5811	3.5069	3.5163	5.4349	5.6154	5.4518	4.9725	5.6266	5.4347
metab_779	pos_782	354.108	1.078	0.8464	0.0008	0.002	5.3603	5.3043	6.3794	5.2938	5.3762	5.2418	6.6735	6.3788	6.7246	6.0158	6.7362	6.4106
metab_780	pos_783	821.154	1.0752	0.8153	0.0069	0.0124	5.4378	4.281	6.2349	5.0956	4.7153	4.2097	6.3666	6.2513	5.9681	5.6353	6.3583	6.186
metab_781	pos_784	294.003	0.9529	0.8319	0.0076	0.0136	4.489	4.0676	5.2957	4.1958	4.9361	3.6248	5.1282	5.515	5.6818	5.2491	5.4256	4.9865
metab_782	pos_785	216.123	0.9614	0.8974	0.0001	0.0004	6.2899	5.9656	6.5403	6.1706	6.5878	6.0216	7.0041	6.9956	6.7743	6.9379	7.035	7.1254
metab_783	pos_786	172.992	1.2249	1.2276	0	0.0002	6.0552	6.307	5.8768	6.2601	5.9499	6.343	4.8395	5.4908	4.5616	5.3476	4.803	4.9278
metab_784	pos_787	261.037	1.3157	0.7437	0.0002	0.0007	3.9283	3.3873	5.0358	3.9951	4.0062	4.2381	5.5644	5.5338	5.9857	5.1083	5.643	5.2272
metab_785	pos_788	164.063	1.0574	0.8412	0	0.0001	4.6074	4.2965	4.8734	4.2677	4.6701	4.1986	5.1914	5.4107	5.2688	5.2697	5.3574	5.4992
metab_786	pos_789	472.166	1.5738	0.6027	0.0044	0.0084	3.0575	3.0901	2.9998	3.0959	4.3614	3.0312	5.2317	2.8364	5.6548	6.2666	6.3565	6.2413
metab_787	pos_790	133.049	0.3275	1.0298	0.1363	0.1725	5.7468	5.624	5.8502	5.8091	6.2487	5.7183	5.5728	5.8477	5.4954	5.6431	5.6349	5.7905
metab_788	pos_791	385.044	0.0044	0.9993	0.9602	0.9674	5.4623	5.4949	5.6242	5.5008	5.4266	5.436	5.4395	5.7412	5.5585	5.1346	5.5736	5.5242
metab_789	pos_792	190.986	0.1621	1.0198	0.5821	0.629	5.227	5.2486	6.0824	5.8151	6.0482	5.9556	5.7353	5.0565	5.7507	5.7619	5.6775	5.7267
metab_790	pos_793	218.981	0.2792	1.0332	0.3512	0.402	5.4003	5.4294	6.2608	6.0238	6.1768	6.1426	5.8199	5.16	5.8622	5.8702	5.765	5.8178
metab_791	pos_794	321.961	0.6875	0.8628	0.2046	0.2481	3.8988	3.9314	6.1851	4.636	6.0009	5.1261	6.3345	3.6775	6.2631	5.9896	6.1606	6.0867
metab_792	pos_795	203.052	0.3874	0.9701	0.1202	0.1544	6.8772	6.7417	6.6902	6.8228	6.926	6.7523	6.9662	7.2709	6.4921	7.002	7.0483	7.2925
metab_794	pos_797	187.06	0.629	0.9183	0.0255	0.0389	5.1878	4.7286	5.297	4.7982	5.0178	4.3152	5.2872	5.5295	5.0055	5.2203	5.4467	5.4667
metab_795	pos_798	622.254	0.0202	1.0008	0.9826	0.9859	6.4567	5.6973	6.7439	6.1467	5.8176	5.6485	6.263	6.0263	6.6926	5.6143	5.6273	6.2538
metab_796	pos_799	485.081	1.1123	0.7507	0.0076	0.0135	3.2785	3.3111	5.2155	3.3372	4.0802	3.2522	5.0411	5.6184	4.6202	5.1631	5.2015	4.2929
metab_797	pos_800	231.049	0.6565	0.8901	0.0743	0.1005	5.494	4.6232	5.032	4.3723	3.9403	4.5879	5.3016	5.8096	4.532	5.4161	5.5521	4.8983
metab_798	pos_801	73.0473	0.7224	1.0636	0	0.0001	6.3916	6.5617	6.3392	6.506	6.3689	6.5673	6.0379	6.1499	6.0378	6.1088	6.0062	6.0785
metab_799	pos_802	201.008	0.4655	1.0713	0.1001	0.1314	4.6908	4.8998	4.5026	4.6754	4.636	4.6167	4.2271	4.6392	3.608	4.5274	4.4906	4.6635
metab_800	pos_803	265.023	0.2043	0.9821	0.4017	0.4538	5.7868	5.6411	5.7962	5.792	5.9107	5.6159	5.7186	6.1478	5.4117	5.9146	5.869	6.1099
metab_801	pos_804	135.945	1.1291	1.1839	0	0.0001	5.9681	6.2661	5.8961	6.17	5.8578	6.2256	4.9735	5.4029	4.9508	5.3616	4.8884	5.1532
metab_802	pos_805	118.943	1.0429	1.155	0	0.0001	5.9239	6.1729	5.8099	6.1263	5.8523	6.1848	5.1361	5.442	5.0049	5.3873	5.0487	5.2124
metab_803	pos_806	259.012	0.6916	1.0831	0.0071	0.0128	5.8064	5.5896	5.5939	5.791	5.8748	5.6559	5.3204	5.7796	5.196	5.2355	5.2882	4.8628
metab_804	pos_807	118.086	0.9799	1.1128	0	0.0002	7.3272	7.4139	7.0149	7.3524	7.0058	7.4618	6.6312	6.497	6.7663	6.3312	6.3356	6.5988
metab_805	pos_808	72.0813	0.9589	1.1167	0.0001	0.0004	6.9855	7.0425	6.5552	6.9977	6.6576	7.0869	6.2742	6.1642	6.4001	5.9596	5.9679	6.2441
metab_806	pos_809	301.15	0.8054	0.8329	0.0945	0.1248	5.1561	4.6052	2.7625	4.0137	3.3086	4.952	5.2362	4.8947	3.9031	5.0269	5.4424	5.2693
metab_808	pos_811	126.055	0.5305	1.0477	0.0187	0.0295	6.2953	6.2423	6.5935	6.4402	6.8821	6.2679	6.1653	6.1936	6.1095	6.1263	6.2684	6.0999
metab_809	pos_812	210.076	0.8512	1.1129	0.0007	0.0017	5.4303	5.9199	5.6322	5.9013	5.9643	5.8223	5.2551	5.5771	5.0735	4.9518	5.1451	5.1509
metab_810	pos_813	486.181	0.8028	0.9111	0.0117	0.0197	6.1914	6.1443	6.402	6.4333	7.2078	6.1674	6.8853	7.0679	6.5726	7.3407	7.3491	7.0911
metab_811	pos_814	524.149	1.324	0.7614	0.0046	0.0087	5.1383	4.7448	7.479	4.7506	5.0581	4.6858	7.1648	6.6868	7.3746	6.6452	7.1839	6.7806
metab_812	pos_815	388.159	1.2291	0.8148	0.0002	0.0007	5.5941	4.8992	4.8089	4.9051	5.497	4.8403	6.6115	5.8316	5.8143	6.3817	6.2332	6.6137
metab_813	pos_816	219.134	1.4293	1.3365	0	0.0001	6.15	6.1866	5.755	6.151	6.0211	6.2236	4.4918	4.5405	5.4076	4.263	4.6321	3.9633
metab_814	pos_817	259.081	0.6209	0.8866	0.0832	0.1111	4.0329	3.6793	4.9131	3.6851	4.8039	3.6204	4.6806	4.6982	5.114	4.1371	4.7432	4.5202
metab_815	pos_818	421.192	0.7387	0.8866	0.0387	0.0564	4.5003	4.533	4.4426	4.5388	5.0527	4.474	5.7406	4.279	4.7097	5.3966	5.4229	5.5155
metab_816	pos_819	643.266	0.589	0.945	0.0083	0.0146	5.4923	5.5249	5.4346	5.5307	5.4565	5.466	5.9528	5.5531	5.6415	5.7525	5.7209	6.1989
metab_817	pos_820	189.123	1.5006	1.3808	0	0.0002	6.0402	6.2548	5.8795	6.1329	6.0318	6.2149	5.0513	4.8634	4.613	4.4966	3.8342	3.6141
metab_818	pos_821	174.991	1.1202	1.2499	0.0045	0.0086	5.7504	6.0746	5.5776	5.9784	5.6083	6.0599	4.7236	5.0187	3.1692	5.0674	4.8947	5.1684
metab_819	pos_822	112.051	1.1554	1.1733	0	0	6.4942	6.4725	6.6816	6.4302	6.7312	6.4329	5.473	5.9698	5.4277	5.5967	5.633	5.3431
metab_820	pos_823	146.092	0.0171	1.0014	0.9467	0.9562	6.592	6.5636	6.9968	6.5603	6.652	6.4684	6.7846	6.5989	6.1622	6.8831	6.5618	6.789
metab_824	pos_827	216.123	0.0467	0.9976	0.87	0.8908	7.1928	7.4063	6.8872	7.3322	7.1065	7.3543	7.2012	7.2228	7.0505	7.101	7.3321	7.4738
metab_827	pos_830	150.058	1.9019	1.6103	0	0.0001	7.2321	7.4428	6.1537	7.4745	6.9076	7.6774	5.1919	4.0169	5.2382	3.7776	4.2547	4.1564
metab_828	pos_831	229.071	0.8859	0.8298	0.0311	0.0463	4.9035	4.226	5.7806	4.0982	3.8133	3.8227	5.1053	5.2304	6.2261	4.935	5.2905	5.3264
metab_829	pos_832	686.202	0.1179	1.0105	0.7915	0.822	6.3643	6.397	7.3289	6.4028	6.3286	6.338	6.4613	6.4134	7.3217	6.0367	6.4461	6.0759
metab_830	pos_833	504.192	0.8638	0.8046	0.0786	0.1057	3.4235	3.5335	5.8673	3.8711	5.0463	3.532	4.179	5.1451	6.6201	5.0825	5.2376	5.1429
metab_831	pos_834	396.149	1.1996	0.7788	0.0057	0.0105	3.7806	5.5566	5.2916	5.0005	5.7787	3.7543	6.294	6.5417	5.5088	6.1789	6.4716	6.4471
metab_832	pos_835	166.05	1.1457	1.2228	0.0001	0.0002	5.3657	5.3459	5.8176	5.369	5.5272	5.3769	4.4038	4.8341	3.9285	4.4257	4.7064	4.525
metab_833	pos_836	240.123	1.1631	0.8598	0.0003	0.0009	7.3947	6.5222	6.7174	6.7056	6.5362	6.2054	7.8335	7.6359	8.1898	8.0054	7.3432	7.6087
metab_836	pos_839	450.16	0.9877	0.8316	0.0154	0.0249	4.4827	4.5153	4.8141	4.5211	6.0417	4.4564	5.7591	5.997	4.7396	5.9681	6.2473	5.9542
metab_837	pos_840	330.118	0.5194	0.9207	0.1832	0.2247	5.1314	4.6907	4.9119	5.0304	5.9806	4.8951	5.7318	6.0266	4.5517	5.2535	6.238	5.4824
metab_838	pos_841	303.154	2.8628	5.0625	0	0	7.079	7.4047	6.5034	7.3719	7.1738	7.2629	2.0687	1.3229	1.1804	1.3717	1.2906	1.2217
metab_839	pos_842	381.15	1.3014	0.773	0.0011	0.0025	5.0381	4.1169	5.503	4.1228	5.4821	4.4864	6.0812	6.1328	5.6277	6.2492	6.8929	6.2094
metab_840	pos_843	244.129	1.5985	1.4501	0	0.0001	6.3353	6.6298	5.5205	6.545	6.0756	6.4557	4.4849	4.9757	3.6842	4.186	3.8011	4.7725
metab_841	pos_844	232.118	0.8785	1.1051	0.0001	0.0003	6.3798	6.2862	6.3577	6.3623	6.3027	6.4757	5.9246	5.7869	5.3528	6.0075	5.7	5.7665
metab_842	pos_845	166.086	0.874	1.1139	0	0.0001	5.7976	5.5917	5.5892	5.5099	5.4982	5.4587	4.8766	5.1536	5.0875	4.9604	4.8563	5.0906
metab_843	pos_846	288.202	1.0328	1.1459	0	0	5.9691	6.1066	5.8776	6.1571	6.0846	6.3823	5.2968	5.4046	5.2536	5.2982	5.3706	5.2977
metab_844	pos_847	467.187	1.1302	0.7452	0.0461	0.0659	3.2003	2.8193	6.2209	5.0729	6.6159	3.2906	6.1817	5.8778	5.932	5.9286	6.3746	6.2337
metab_845	pos_848	354.139	0.3127	0.9511	0.4386	0.4909	5.2424	4.4864	5.0567	4.4922	5.6835	4.4274	5.2766	5.4004	4.0815	5.6551	5.4949	4.9943
metab_846	pos_849	110.06	0.1486	0.9923	0.3504	0.4013	6.2294	6.2764	6.2078	6.1887	6.1726	6.0492	6.295	6.0797	6.21	6.3174	6.1969	6.3134
metab_847	pos_850	247.129	1.3015	1.2203	0	0.0001	6.912	7.0247	6.6248	7.0755	6.9676	7.1115	5.88	6.1047	5.1262	5.7317	5.722	5.621
metab_848	pos_851	189.123	1.0313	1.1362	0	0	6.3471	6.3268	6.3633	6.307	6.3707	6.2291	5.8077	5.4732	5.5957	5.4302	5.58	5.5078
metab_849	pos_852	210.076	0.6884	1.0826	0.0118	0.0198	5.864	5.9792	6.6017	5.9454	6.0942	5.6996	5.7551	5.2618	5.7555	5.4254	5.6663	5.5617
metab_850	pos_853	258.108	1.007	1.1958	0.0106	0.0181	5.4712	5.4128	6.3762	5.736	6.2523	5.5684	4.4208	5.3723	5.6012	4.7536	5.0355	3.9317
metab_851	pos_854	393.982	0.8974	0.8624	0.0115	0.0193	4.8037	4.8363	6.0132	4.8422	4.768	5.2049	5.8908	5.8924	5.292	6.515	5.6059	6.1342
metab_852	pos_855	349.135	1.8103	0.6588	0	0.0001	4.046	4.0787	5.435	4.1154	5.5691	5.2132	7.4225	6.8591	7.551	7.03	7.4089	6.9266
metab_853	pos_856	219.966	0.571	0.9098	0.111	0.1439	4.0163	4.297	5.5569	5.062	5.0122	5.4871	5.2617	5.579	5.0102	5.7274	5.2359	5.5302
metab_854	pos_857	317.145	0.7531	1.1285	0.0578	0.0804	5.1876	5.6968	6.7863	5.5601	5.355	5.6001	4.9186	5.8443	4.9737	4.6071	4.5927	5.3602
metab_855	pos_858	175.024	1.1162	0.7786	0.0211	0.0329	3.2812	3.3138	6.0266	4.8883	5.2775	5.5459	6.0855	5.9359	5.7431	6.594	5.8367	6.1919
metab_856	pos_859	287.98	0.5837	0.9189	0.0964	0.1271	4.6869	4.7883	6.0024	5.5896	5.5906	6.1011	5.8443	6.1215	5.5596	6.1918	5.8393	6.0958
metab_857	pos_860	528.046	0.6961	0.9143	0.0335	0.0495	5.434	5.4667	6.4388	5.4725	6.3233	5.4937	6.5054	6.1144	5.8948	6.5102	6.3544	6.4996
metab_858	pos_861	714.103	1.3644	0.738	0.0006	0.0016	4.1057	4.1383	5.6954	4.1442	4.07	4.1515	6.2877	5.6196	5.3015	6.4413	5.8067	6.1803
metab_859	pos_862	522.076	0.8653	0.8676	0.0486	0.0691	4.7432	4.7758	6.8127	6.2742	6.8728	6.2176	7.0656	6.6386	6.4705	7.0008	6.9332	7.0329
metab_860	pos_863	437.972	1.031	0.8368	0.0079	0.0139	4.9221	4.9547	6.4394	4.9605	4.8863	5.6184	6.3937	6.2996	5.7311	7.0049	5.9996	6.5533
metab_861	pos_864	226.071	0.3809	0.9632	0.2311	0.2766	6.5671	6.2864	7.0389	6.9256	7.5738	6.5557	7.2504	6.7484	7.2588	6.9277	7.2306	7.1012
metab_862	pos_865	330.998	0.0787	0.9879	0.856	0.8787	4.9741	4.0412	6.302	5.6125	6.1821	5.6728	5.7601	5.2731	5.1455	5.594	5.7478	5.6663
metab_864	pos_867	213.123	0.9355	1.1338	0.0008	0.002	6.5094	6.2977	5.8089	6.3182	5.8209	6.206	5.3859	5.8063	5.2289	5.135	5.6237	5.4176
metab_865	pos_868	120.537	0.9782	1.1425	0	0	5.5393	5.5911	5.5942	5.6267	5.2974	5.728	4.8052	4.9373	4.8754	4.7098	4.8979	4.9873
metab_866	pos_869	314.019	1.3529	1.3264	0	0.0001	5.7018	5.3622	5.8926	5.5549	4.8369	5.6848	4.3748	4.0656	4.0914	4.0647	3.9568	4.3502
metab_868	pos_871	474.056	0.4174	1.052	0.1947	0.2373	6.3305	5.5074	6.4847	6.5974	6.833	6.1066	6.295	5.6915	5.912	5.6354	6.3108	6.1423
metab_869	pos_872	369.06	1.118	1.2305	0.0012	0.0028	5.8384	5.1051	6.0045	5.8979	5.8636	5.7249	5.1275	4.4457	4.2933	3.9693	5.081	5.0658
metab_870	pos_873	144.031	1.2256	1.269	0	0	5.2982	5.0257	5.5969	5.2135	4.837	5.3677	4.3018	3.8222	4.2445	4.0604	4.1192	4.1497
metab_871	pos_874	229.974	0.8973	1.1086	0	0	6.0257	5.9852	6.15	6.1369	5.9061	6.1877	5.5598	5.5488	5.2189	5.4204	5.5231	5.5576
metab_872	pos_875	294.57	0.6914	1.0871	0.0228	0.0352	6.4121	5.9457	6.7403	6.6172	6.7762	6.2283	6.2958	5.4892	6.0796	5.5238	6.1706	6.0554
metab_873	pos_876	846.308	1.6948	0.636	0.0032	0.0064	4.0143	4.047	7.9154	4.0528	3.9786	3.988	7.295	6.7224	8.4131	7.2615	7.4554	6.8728
metab_874	pos_877	255.028	1.0357	1.1504	0	0.0002	6.2145	6.2731	6.2007	6.278	5.8051	6.3937	5.3212	5.6138	5.0555	5.39	5.377	5.5449
metab_875	pos_878	184.108	0.6922	0.921	0.0112	0.0189	5.3202	5.5408	5.3417	5.5286	5.4777	5.6852	6.1378	6.1853	5.3055	6.0162	5.8475	6.2178
metab_876	pos_879	445.192	0.9133	0.8355	0.0263	0.0399	4.7985	3.9883	3.8979	4.2482	5.0669	4.3871	5.6049	5.5991	3.8935	5.5345	5.4373	5.5178
metab_877	pos_880	504.192	0.3589	0.9343	0.3938	0.4457	4.7169	4.7496	4.9173	4.7554	4.6812	4.6906	4.3879	4.4956	6.8887	4.8416	4.9327	4.9699
metab_878	pos_881	214.071	0.5324	0.9404	0.0413	0.0597	5.1516	4.8203	5.5629	4.9976	5.4574	4.8857	5.7006	5.247	5.4451	5.4109	5.4688	5.5583
metab_879	pos_882	549.092	0.3565	0.933	0.3743	0.4253	4.5687	4.6013	5.7281	4.6072	4.533	4.5424	4.7866	4.3474	6.4673	5.196	5.316	4.5178
metab_880	pos_883	882.192	0.3434	0.935	0.4195	0.472	4.9624	4.9951	6.4866	5.0009	4.9267	4.9361	5.6086	4.7411	6.9891	5.7709	5.743	4.6342
metab_881	pos_884	434.117	1.2668	0.7851	0.0086	0.0151	5.773	4.9376	8.0187	6.117	5.8127	4.8787	7.4269	7.2448	8.3525	7.5013	7.5849	7.1539
metab_882	pos_885	170.081	0.1241	1.0114	0.7061	0.7428	6.5551	6.1218	6.9907	6.22	6.0982	5.9277	6.5454	6.2188	6.1069	5.9414	6.4157	6.2625
metab_883	pos_886	432.186	0.7755	0.895	0.015	0.0244	5.5188	4.6161	5.3803	4.7623	5.2884	4.7679	5.8752	5.2529	5.9336	5.8487	5.253	5.7297
metab_884	pos_887	284.17	0.949	0.8277	0.0086	0.0151	4.2392	3.6793	5.2963	3.8202	4.6476	3.681	4.9908	4.9829	5.3626	5.0129	5.1795	5.1159
metab_885	pos_888	426.081	1.438	1.3642	0.0006	0.0016	6.6803	6.0539	7.0498	6.3879	5.685	6.557	5.3458	3.8704	5.2166	3.7351	4.9269	5.0616
metab_886	pos_889	278.065	1.4153	1.383	0.0005	0.0013	6.2462	5.1621	6.7712	5.7774	5.0939	5.986	4.7144	3.922	4.8139	3.8157	3.888	4.18
metab_887	pos_890	190.107	0.5841	1.0612	0.0145	0.0237	6.6336	6.0704	5.9671	6.2032	5.8535	6.0818	5.9513	5.8061	5.603	5.7475	5.7922	5.7878
metab_888	pos_891	112.04	1.0631	1.1605	0	0	5.818	5.831	6.0914	5.8925	5.6905	6.1752	5.1239	5.0588	5.0816	4.97	5.2082	5.1431
metab_889	pos_892	627.114	0.8756	0.8276	0.105	0.137	4.1127	4.1453	4.8739	6.142	7.4623	4.0864	6.7691	5.6704	5.8839	5.8056	6.7515	6.363
metab_890	pos_893	103.539	0.42	0.948	0.1105	0.1434	4.6457	4.9381	4.0554	4.7788	4.3227	4.7314	4.8885	4.955	4.6586	4.6916	4.9568	4.8321
metab_891	pos_894	222.061	0.1661	1.0225	0.5829	0.6297	5.2366	4.615	5.3602	5.6865	5.9344	5.2864	5.4419	5.0515	5.1648	4.8905	5.5242	5.3357
metab_893	pos_896	259.128	0.8004	1.0943	0.0015	0.0033	6.6276	6.1979	6.7597	6.2965	6.1136	6.1601	5.5611	5.7549	5.9646	5.7878	5.8282	5.9718
metab_894	pos_897	246.977	1.1464	1.1957	0	0	5.9518	5.976	5.9312	5.9854	5.5221	6.0369	4.9702	5.1522	4.6529	4.7274	4.9946	5.1118
metab_895	pos_898	161.044	0.2495	0.9848	0.1065	0.1388	5.6835	5.6307	5.5473	5.569	5.4559	5.5075	5.5998	5.6807	5.5838	5.5518	5.731	5.7645
metab_896	pos_899	351.175	0.7196	0.9134	0.0138	0.0227	5.5824	5.1115	6.0203	5.671	6.0261	5.3096	6.5603	6.1851	5.8675	6.1904	6.1032	6.0093
metab_897	pos_900	442.191	0.9163	0.8761	0.0115	0.0194	5.9825	4.6066	5.8492	6.1103	6.4188	5.564	6.4762	6.4841	6.6401	6.5728	6.4245	6.8179
metab_898	pos_901	314.084	0.2241	0.9803	0.5017	0.5522	7.1708	6.7899	7.5295	7.6758	8.2023	7.2308	7.7788	7.3165	7.3865	7.5631	7.7686	7.681
metab_899	pos_902	162.124	0.1773	1.016	0.5178	0.5673	5.7466	5.8521	5.9654	5.6043	5.3286	5.4445	5.5658	5.8394	5.193	5.503	5.6098	5.6942
metab_900	pos_903	418.17	1.2118	0.8241	0.002	0.0042	6.5761	5.4654	5.5671	5.9937	6.5459	5.0305	7.092	7.3729	6.3989	7.3703	6.9715	7.4808
metab_901	pos_904	275.007	0.006	1.002	0.9726	0.977	5.7114	5.3447	6.9382	5.7718	6.4048	5.5646	6.4117	4.8839	5.6066	6.2783	6.5151	5.9657
metab_902	pos_905	187.008	0.4273	1.0391	0.0512	0.0723	5.6498	5.7752	6.137	5.8178	5.9288	5.8119	5.7628	5.3959	5.4344	5.7287	5.8308	5.6447
metab_903	pos_906	235.961	0.2623	1.0375	0.4091	0.4611	5.1236	4.8951	5.8518	5.2874	5.5964	5.1018	5.4389	4.3547	5	5.2822	5.4861	5.1425
metab_904	pos_907	198.007	0.2737	1.0284	0.3015	0.3513	5.7961	5.7388	6.3871	5.9323	6.1484	5.8626	6.0311	5.3479	5.633	5.929	6.0836	5.8519
metab_905	pos_908	129.026	0.8229	1.1127	0.0006	0.0014	5.3141	5.2469	5.7425	5.4452	5.6708	5.2224	5.0146	4.8309	4.6623	4.9221	5.0986	4.8081
metab_906	pos_909	360.023	0.0966	0.9839	0.7754	0.8077	4.8196	4.6774	6.6108	5.6565	5.4539	6.1819	5.7941	5.5988	5.6327	5.524	5.5664	5.8327
metab_907	pos_910	312.11	0.7877	1.1861	0.1299	0.1653	6.0153	6.0896	4.8245	6.3225	6.1285	6.365	6.7117	3.8134	6.3013	4.4856	5.1215	3.7066
metab_908	pos_911	132.102	0.9255	1.1034	0.0015	0.0032	8.0412	8.1013	7.5428	8.0661	7.7261	8.1599	7.3939	7.0566	7.6358	7.0766	6.6643	7.3513
metab_909	pos_912	147.076	1.1053	1.2781	0.0028	0.0056	4.7276	4.7551	5.4554	4.6294	4.0669	4.795	3.3822	4.4563	4.1165	3.4462	3.4559	3.383
metab_910	pos_913	418.17	1.615	0.7249	0.0013	0.0029	6.5722	4.2785	5.1849	6.3218	7.252	4.7956	8.0724	8.0094	7.247	8.0932	7.827	8.2084
metab_911	pos_914	170.044	0.0256	0.9929	0.9103	0.9254	5.5622	5.1004	6.7873	5.1086	5.7497	4.3548	5.2175	5.701	5.6039	5.4886	5.5181	5.3698
metab_912	pos_915	235.119	1.374	1.3194	0	0	5.3985	5.7761	5.4642	5.6537	5.2981	5.6238	3.9504	4.3844	4.1378	4.0678	4.2589	4.3743
metab_914	pos_917	263.076	0.994	0.8389	0.0085	0.0149	5.1093	4.3901	5.518	4.8808	5.6163	3.9803	5.9667	5.4925	5.5218	5.8803	6.2831	6.0148
metab_915	pos_918	264.098	0.8838	0.8431	0.0275	0.0415	4.3711	3.9603	5.8388	4.064	5.3055	4.1321	5.6259	5.0539	5.7906	5.373	5.4024	5.576
metab_916	pos_919	267.058	1.0347	1.1282	0	0.0002	7.1641	7.3327	6.9746	7.299	7.0769	7.4631	6.2424	6.3541	6.2351	6.8266	6.4203	6.3115
metab_917	pos_920	329.029	0.972	1.1174	0	0.0002	6.8303	6.9404	6.7296	6.939	6.8174	7.0429	6.0751	6.2088	5.8489	6.542	6.1737	6.1141
metab_918	pos_921	136.076	1.0387	1.1298	0.0001	0.0005	7.0718	7.3904	7.1038	7.3938	7.0315	7.5757	6.659	6.5508	6.7295	6.1826	6.0878	6.3541
metab_919	pos_922	615.035	1.5683	0.6461	0.0015	0.0034	3.5348	3.5674	5.8579	3.5732	3.4991	3.5085	6.2838	5.9792	5.0095	7.211	5.491	6.4557
metab_920	pos_923	113.035	0.813	1.0741	0.0001	0.0002	7.3711	7.4066	7.3524	7.4076	7.3607	7.4804	6.7634	6.8368	6.7612	7.2395	6.8922	6.8224
metab_921	pos_924	103.539	0.932	0.8698	0	0.0002	4.4967	4.8397	4.3071	4.552	4.3157	4.2646	5.1495	5.2287	5.0383	5.04	5.2027	5.1269
metab_922	pos_925	298.114	0.2033	0.9655	0.6603	0.7008	4.4201	4.7718	3.7779	4.9665	5.0224	5.417	5.1922	5.1525	3.4634	5.0617	5.4468	5.0738
metab_923	pos_926	292.149	0.1413	0.9804	0.7367	0.7719	5.9841	5.5106	6.4086	6.4246	7.2295	5.9156	6.5378	7.0575	5.105	6.3808	6.524	6.6188
metab_924	pos_927	301.142	1.0888	1.1924	0.0002	0.0007	6.025	6.1936	5.2702	6.1523	5.7942	6.2646	5.0745	5.1003	4.5887	4.9942	5.1027	5.079
metab_925	pos_928	344.133	0.8305	0.915	0.0051	0.0096	6.9268	6.7201	7.8356	6.9979	7.3772	6.7985	8.0645	7.82	7.7662	7.7066	7.5965	7.6617
metab_926	pos_929	216.054	1.2836	1.2419	0	0	6.2554	6.3912	5.7522	6.3805	6.1113	6.4758	5.1892	5.3137	4.8344	4.8125	4.9304	5.0117
metab_927	pos_930	278.087	1.2975	0.7074	0.0026	0.0054	3.592	3.2916	5.6029	3.2974	3.2233	3.2327	5.0922	5.1385	5.1897	5.4044	5.2763	5.3413
metab_928	pos_931	200.128	0.9358	0.8779	0	0	4.6876	4.6948	4.8608	4.5758	4.6225	4.5179	5.2402	5.2265	5.2997	5.1327	5.5261	5.4243
metab_929	pos_932	120.024	0.2409	1.0202	0.2242	0.2694	5.0086	5.1647	5.161	5.2728	5.1921	5.4525	5.2978	5.0937	5.0145	5.0134	5.2206	4.9984
metab_930	pos_933	212.091	0.0529	1.0044	0.8721	0.8925	6.0553	5.6536	6.5113	5.878	6.1986	5.6398	6.0954	6.167	5.6694	6.06	5.8333	5.9558
metab_931	pos_934	230.102	0.0716	0.9895	0.7877	0.8187	6.0575	6.0109	7.2445	6.3723	6.8739	5.98	6.7912	6.8178	6.1203	6.5814	6.2834	6.3501
metab_932	pos_935	205.071	0.7458	0.8985	0.0141	0.0232	4.9496	4.5921	5.7076	4.9369	5.1606	5.0168	5.4178	5.9855	5.2325	5.4957	5.7663	5.9005
metab_933	pos_936	212.007	1.4141	0.6781	0.0139	0.0229	2.3665	2.399	6.1781	4.4166	4.97	5.6081	6.3932	6.3766	5.6903	7.1339	6.0351	6.6185
metab_934	pos_937	696.17	1.2383	0.7448	0.0046	0.0087	3.8851	3.9177	6.0105	3.9236	3.8494	3.8588	5.5761	5.0727	6.3809	6.0054	5.6969	5.4308
metab_935	pos_938	440.981	0.9346	0.829	0.018	0.0286	4.4233	4.4164	5.0531	4.1602	4.086	4.387	5.3724	5.6592	4.1184	6.1522	4.9682	5.7248
metab_936	pos_939	294.118	0.0068	1.0006	0.9781	0.982	6.5898	5.6442	6.6318	6.1268	6.5572	6.007	6.2635	6.5306	6.0251	6.258	6.2094	6.2404
metab_937	pos_940	121.065	1.2958	1.2492	0.0004	0.0012	7.8294	7.3344	6.2316	7.1586	6.2426	6.5608	5.4789	5.5565	5.5514	5.4097	5.5721	5.5401
metab_938	pos_941	188.091	0.2083	1.0154	0.3263	0.3773	6.0435	5.9249	6.4556	5.9224	6.0646	5.8917	5.8503	5.9564	5.9608	5.9692	5.977	6.0353
metab_939	pos_942	260.16	1.1284	1.1518	0	0	6.79	6.9507	6.7308	7.0729	7.0251	7.2201	6.0228	6.0875	6.0229	6.0031	6.0469	6.0994
metab_941	pos_944	307.083	1.5473	0.7038	0.0003	0.001	5.0413	3.5668	5.2436	4.8563	4.2831	4.5396	6.483	6.3306	6.9458	5.3597	6.7602	7.2336
metab_942	pos_945	174.112	0.884	1.1038	0	0.0002	6.16	6.2952	6.3199	6.198	6.0006	6.4205	5.6536	5.8408	5.7698	5.5677	5.4136	5.6324
metab_943	pos_946	295.158	0.9296	0.8982	0.002	0.0043	6.8054	6.2353	6.9771	6.5637	6.9149	6.2428	7.589	7.1842	7.6172	7.517	6.8511	7.4859
metab_944	pos_947	123.055	0.5925	0.9462	0.0206	0.0321	6.8984	6.2544	6.7625	6.3958	6.5121	6.1215	6.9225	6.6524	6.9804	6.9752	6.9185	6.7112
metab_945	pos_948	185.092	0.4909	1.0516	0.0549	0.0768	5.8935	5.6975	6.2592	5.9513	6.3958	5.7629	5.8287	5.7445	5.4221	5.5732	5.9299	5.6967
metab_946	pos_949	168.065	0.0376	0.9967	0.8575	0.88	5.7229	5.6167	6.1259	5.7003	5.9671	5.6583	5.643	5.9619	5.6586	5.7308	5.9454	5.9669
metab_947	pos_950	139.039	0.865	0.8985	0.0021	0.0045	6.2733	5.6605	5.5872	5.8128	5.7994	5.8781	6.7566	6.7724	6.412	6.1782	6.7545	6.0896
metab_948	pos_951	252.107	1.2005	1.2784	0.0003	0.0008	5.1521	5.1826	5.7476	5.0491	4.8666	4.9748	3.8252	4.679	3.6649	3.7095	4.3663	3.9804
metab_949	pos_952	197.02	0.9586	0.808	0.0129	0.0215	3.7414	3.774	4.0346	3.7799	3.7057	4.0227	4.6855	5.2428	3.3693	5.0029	4.8449	5.3937
metab_951	pos_954	189.123	2.1946	2.2049	0	0	5.9341	6.4274	5.3642	6.5608	6.4565	6.9588	3.0865	2.8817	2.7311	2.7756	2.8478	2.7751
metab_953	pos_956	129.055	0.5261	1.0467	0.002	0.0043	5.5737	5.7197	5.4965	5.7173	5.7607	5.7377	5.2988	5.3492	5.3637	5.4386	5.4454	5.5968
metab_956	pos_959	230.138	0.7726	0.9303	0.0004	0.0011	6.5512	6.1823	6.5429	6.3755	6.6196	6.2523	7.0159	6.8861	7.0068	6.9418	6.6368	6.9246
metab_960	pos_963	434.165	0.3211	1.0345	0.2585	0.3061	6.5533	6.3498	6.1658	6.1184	6.1604	6.0562	6.2806	5.8769	5.6131	5.9466	6.6626	5.7788
metab_961	pos_964	284.112	0.318	1.0444	0.2865	0.3358	5.6493	4.7329	5.3586	5.2345	5.8276	4.6501	5.1053	5.0257	4.891	4.9225	5.0528	5.1181
metab_963	pos_966	253.07	1.1933	0.6612	0.0418	0.0604	3.4716	3.474	5.6191	3.5905	4.1738	0.1811	4.8361	5.1688	6.0045	4.7873	5.0648	5.1547
metab_964	pos_967	300.144	0.4804	1.051	0.0736	0.0996	6.5752	6.1859	5.8751	6.0699	5.8577	5.8163	5.6726	6.0734	5.8222	5.4844	5.9368	5.6261
metab_966	pos_969	250.128	1.427	1.295	0	0	6.5768	6.5083	6.3351	6.5667	6.4764	6.676	5.1953	5.6483	4.5986	4.9081	4.7412	5.1284
metab_968	pos_971	666.245	1.2468	0.7821	0.0077	0.0137	6.063	4.3033	6.9782	5.5732	5.6663	4.2443	6.6986	6.9029	7.7802	6.8445	6.8891	6.8534
metab_972	pos_975	426.16	1.4043	0.7181	0.0111	0.0187	3.7648	3.7974	7.1784	5.4367	6.5455	3.7385	7.2303	6.7104	6.7843	7.2862	6.9318	7.4795
metab_973	pos_976	228.086	0.362	1.0357	0.1321	0.1678	5.7343	5.4834	5.6697	5.5217	5.7311	5.1213	5.346	5.6134	5.1271	5.2762	5.448	5.3065
metab_974	pos_977	316.149	0.8393	0.8323	0.0943	0.1246	4.8602	5.0166	5.7745	5.35	5.89	3.3709	6.7064	6.8534	4.1839	6.2372	6.5469	5.8309
metab_975	pos_978	270.133	1.1342	0.8803	0.0002	0.0006	7.7201	7.1449	7.19	7.3899	7.7578	6.8964	8.6032	8.246	8.177	8.5347	7.9675	8.5636
metab_978	pos_981	314.123	0.151	1.0151	0.586	0.6321	6.3631	5.7546	6.0107	5.929	6.1598	5.9745	5.6507	6.1862	6.4994	5.8172	5.6907	5.8067
metab_979	pos_982	330.154	0.6112	0.8958	0.1152	0.1488	4.6125	4.4629	3.6417	5.2944	4.9793	4.0467	5.2708	5.2174	4.2405	4.9209	5.0306	5.5002
metab_982	pos_985	229.154	0.0702	1.0051	0.8354	0.8605	7.0288	6.5538	7.152	6.5168	6.5407	6.2142	6.632	6.66	6.6954	6.5393	6.8943	6.3806
metab_991	pos_994	136.062	0.673	1.065	0.0112	0.0189	6.7781	6.9019	7.4442	7.1909	7.4324	7.4268	6.625	7.0591	6.5328	6.7243	6.8461	6.7534
metab_992	pos_995	193.097	0.7065	0.8831	0.0374	0.0546	4.4368	3.6669	4.3607	4.617	4.8998	4.4342	5.3645	5.1442	5.0269	4.474	5.4507	4.4528
metab_993	pos_996	528.185	0.1849	1.0482	0.6737	0.7133	4.2774	4.5173	4.2197	4.5305	5.9981	6.0831	3.996	4.2629	5.1118	3.9498	6.4267	4.5216
metab_995	pos_998	284.113	0.4638	0.9051	0.2536	0.3006	4.8028	3.7263	3.7693	4.2376	3.6579	3.9014	4.3299	4.381	5.8233	4.1523	3.6463	4.2871
metab_996	pos_999	246.133	1.5096	1.302	0	0	7.2161	7.1529	6.5941	7.2187	7.0366	7.3118	5.6019	5.857	5.2521	5.3697	5.168	5.4147
metab_997	pos_1000	230.102	0.1833	1.0182	0.57	0.6177	5.8506	5.7222	6.5929	5.8914	6.2532	5.6458	6.0973	6.2087	5.5185	5.9764	5.7044	5.813
metab_1002	pos_1005	152.056	1.3152	1.1869	0	0	7.756	7.8405	7.645	7.8569	7.8244	7.9399	6.5224	6.9865	6.3938	6.6331	6.422	6.5206
metab_1004	pos_1007	256.118	0.2196	0.9834	0.3898	0.4414	6.2649	5.9469	5.9382	6.0742	6.418	5.862	6.2357	6.1362	5.9946	6.4109	5.9859	6.361
metab_1008	pos_1011	268.117	0.0607	1.0056	0.819	0.8456	6.0061	5.6236	5.5997	5.6531	5.3686	5.2308	5.8685	5.5705	5.4268	5.5214	5.3333	5.5758
metab_1011	pos_1014	189.102	0.4404	0.9419	0.2366	0.2824	6.1052	5.4374	4.9153	5.6854	5.5957	5.8435	6.3188	5.7576	5.7484	5.5547	6.8431	5.4307
metab_1013	pos_1016	559.06	1.0208	0.7956	0.0148	0.0242	4.8803	4.2418	4.1515	4.2476	4.1734	4.1829	6.0363	5.9995	5.5672	4.9092	6.1313	3.881
metab_1014	pos_1017	174.149	2.2472	4.7299	0	0	4.3104	4.5435	3.9718	4.6187	4.922	4.5829	0.9151	1.0111	0.8774	0.9163	1.0626	0.9159
metab_1018	pos_1021	172.108	0.3155	1.0446	0.4037	0.4559	5.0107	5.1272	5.8394	5.2465	4.9427	4.8994	5.3404	5.4823	4.0252	4.9365	5.0859	4.8717
metab_1021	pos_1024	240.086	0.4784	1.0418	0.0143	0.0234	5.8432	5.7653	5.9486	5.8345	6.1053	5.9741	5.739	5.7621	5.4761	5.5029	5.8591	5.7136
metab_1022	pos_1025	432.186	1.3119	0.791	0.001	0.0023	6.1325	4.5646	5.6876	5.419	6.0444	4.4574	6.9022	6.5317	6.8416	6.9096	6.5633	7.0936
metab_1023	pos_1026	254.161	1.1033	1.19	0.0034	0.0067	7.2547	6.7485	6.4915	6.7687	6.3659	6.5739	5.0879	6.7457	5.7359	5.7411	5.183	5.2934
metab_1024	pos_1027	179.07	0.3353	0.9739	0.0875	0.1165	5.7735	5.5375	5.8517	5.5987	5.8647	5.5994	5.7062	6.0293	5.9352	5.6793	5.8965	5.8963
metab_1026	pos_1029	160.076	0.4719	0.9448	0.2123	0.2565	7.2514	6.6125	6.0848	6.6884	6.4134	6.7025	7.431	6.5699	7.3215	6.4586	7.8411	6.4469
metab_1028	pos_1031	229.118	0.5458	1.0688	0.0549	0.0769	5.5307	5.3758	5.8066	5.7813	6.4892	5.4936	5.5565	5.3177	5.2944	5.2898	5.4852	5.3125
metab_1030	pos_1033	428.141	0.3335	0.9554	0.4095	0.4615	5.803	4.7324	5.7475	6.2269	7.0586	5.7998	5.9749	6.5121	6.0456	6.1343	6.0296	6.324
metab_1032	pos_1035	296.099	0.9374	1.1925	0.0213	0.0331	5.5024	5.655	5.3406	5.8762	6.6322	5.9288	5.2275	5.7758	3.738	5.1552	4.4161	4.983
metab_1033	pos_1036	269.113	1.1985	1.1962	0	0	6.1337	6.1275	6.3033	6.3334	6.4901	6.5115	5.3787	5.0768	5.3084	5.3191	5.2853	5.32
metab_1034	pos_1037	355.15	1.2231	0.78	0.0048	0.009	5.2485	3.9219	5.5871	4.7244	5.9727	3.8112	6.6158	6.2575	5.9014	5.9985	6.5945	6.1559
metab_1035	pos_1038	347.181	0.189	1.0255	0.5785	0.6255	5.7118	5.5322	5.3369	5.4396	5.5186	5.3193	6.0911	5.6814	4.4776	5.5516	5.0121	5.2256
metab_1036	pos_1039	282.097	0.4969	1.0903	0.1687	0.2088	5.7022	5.3392	4.3376	5.2657	5.4273	5.2908	4.9789	4.9774	3.8828	4.7351	5.5394	4.6525
metab_1038	pos_1041	387.139	0.7283	0.8993	0.0134	0.0222	4.3802	4.7017	4.9416	4.7607	5.2332	5.0141	5.4611	5.1937	5.6642	5.1397	5.8436	4.9845
metab_1039	pos_1042	271.129	1.3211	1.3346	0	0.0001	5.0929	4.789	5.3556	5.0588	5.8938	5.1123	4.0866	3.9994	4.0044	3.7512	3.786	3.8293
metab_1041	pos_1044	321.144	1.1086	0.8323	0.0034	0.0068	5.9203	5.2287	5.1585	5.5433	5.8905	4.9329	7.1346	6.241	6.2223	6.1241	7.4158	6.1175
metab_1042	pos_1045	113.06	0.1025	1.0078	0.5581	0.6061	5.3882	5.372	5.5603	5.3067	5.3747	5.3691	5.3167	5.2852	5.253	5.5956	5.2004	5.4652
metab_1043	pos_1046	400.159	1.0947	0.8078	0.0133	0.0219	5.1199	4.1159	4.4511	5.3836	6.1425	4.4213	6.165	6.5325	5.0554	6.5536	5.8548	6.5203
metab_1045	pos_1048	240.123	0.7786	0.9035	0.0104	0.0178	5.8076	5.5665	6.451	5.6295	5.8447	5.2616	6.5783	6.6046	6.0626	6.0118	6.455	6.5349
metab_1046	pos_1049	283.139	1.4482	0.7994	0	0	6.0089	5.8063	6.3666	6.2509	6.9239	5.7732	7.9783	7.6767	7.6138	7.7684	7.705	7.7013
metab_1047	pos_1050	351.175	0.6323	1.0914	0.0571	0.0796	5.7448	5.8493	5.1862	5.8996	5.7659	5.6437	5.3852	5.8511	4.6203	5.3947	5.3215	4.6644
metab_1049	pos_1052	190.05	1.3993	1.4128	0	0.0001	4.7537	4.9276	5.4543	4.9193	4.9537	5.0952	3.1922	3.9182	2.9198	4.0104	3.6832	3.5829
metab_1051	pos_1054	414.139	0.712	0.8921	0.0612	0.0846	5.0732	4.4385	5.072	4.9576	5.9483	4.8117	6.0164	5.419	5.1537	5.339	6.503	5.5353
metab_1052	pos_1055	330.155	0.0947	1.0124	0.8265	0.8526	5.5436	4.6011	5.8669	4.6828	4.7897	4.4073	5.0882	5.2792	4.5995	4.6632	5.2142	4.6843
metab_1053	pos_1056	267.134	1.1317	1.1988	0.0001	0.0002	5.8627	5.9783	5.9241	5.985	6.1134	5.9218	5.3067	5.0012	4.2948	5.1664	5.1476	4.934
metab_1054	pos_1057	312.144	0.4222	0.9622	0.0837	0.1118	6.0358	5.7776	6.0978	5.9617	6.2758	5.8974	6.4484	6.477	5.8073	6.1365	6.2652	6.3293
metab_1055	pos_1058	210.076	0.0262	1.004	0.9092	0.9243	5.1761	4.6555	5.719	5.1658	5.7889	5.209	5.2378	5.2796	5.1542	5.281	5.1529	5.4843
metab_1056	pos_1059	298.114	0.9036	1.125	0.0025	0.0051	6.29	6.4958	6.1079	6.4607	6.3406	6.5773	5.7597	6.3358	5.2186	5.7796	5.3202	5.6034
metab_1057	pos_1060	252.159	1.8398	1.8756	0	0.0001	6.274	5.1565	5.4667	5.4823	5.0468	4.5115	2.654	3.7249	2.6109	2.6554	2.7276	2.6549
metab_1058	pos_1062	247.129	0.68	1.0694	0.0031	0.0063	6.111	6.2131	6.5206	6.2825	6.0862	6.333	5.918	5.7039	6.048	5.5211	6.01	5.9101
metab_1059	pos_1063	199.107	0.2871	1.0261	0.2518	0.2988	6.016	5.9258	6.4502	6.1349	6.6256	5.9268	6.1644	5.9324	5.9652	5.9758	6.1802	5.921
metab_1060	pos_1064	293.113	0.4593	1.0474	0.0364	0.0533	5.3676	5.2385	5.4671	5.5049	5.7367	5.6921	5.4346	5.2432	4.9542	5.3852	5.2546	5.239
metab_1062	pos_1066	330.1	1.5967	1.5044	0	0.0001	5.5327	5.8203	5.1263	6.2603	5.398	5.758	3.3499	4.569	4.0865	3.3512	3.4236	3.7525
metab_1064	pos_1068	237.087	0.2061	1.0224	0.4828	0.534	6.0661	5.9125	6.28	6.3733	6.9626	6.4181	6.5026	5.8572	6.5703	5.9863	6.2717	5.9877
metab_1065	pos_1069	501.207	1.1257	0.7869	0.0202	0.0316	5.1563	3.1956	4.774	5.2976	6.3041	4.2592	6.6685	5.7903	5.7495	5.8595	6.8851	5.8841
metab_1067	pos_1071	341.16	0.4726	0.933	0.2076	0.2514	5.3915	4.7705	5.7487	5.3964	6.287	5.0899	6.3233	5.5891	5.5195	5.5876	6.5637	5.4477
metab_1068	pos_1072	237.121	1.305	1.2772	0	0	5.4978	5.9486	5.9481	5.8487	5.2839	6.0053	4.7929	4.2408	4.3202	4.5461	4.6688	4.4647
metab_1070	pos_1074	372.128	1.1023	0.8518	0.0005	0.0014	6.0618	4.9439	5.8518	5.5082	6.0892	5.6275	6.7948	6.8907	6.3398	6.5924	6.8971	6.4954
metab_1071	pos_1075	212.091	0.3609	0.9573	0.2372	0.2831	5.655	5.2802	6.2856	5.4718	5.8342	5.3327	6.113	5.8142	5.4944	5.7714	6.4006	5.7783
metab_1072	pos_1076	327.049	1.7953	1.7224	0	0	5.8111	5.99	4.6059	5.8257	5.4307	5.843	3.2183	3.3259	3.1751	3.2197	3.292	3.2191
metab_1073	pos_1077	265.079	1.1472	1.2256	0.0008	0.002	6.0325	6.5066	5.2792	6.3148	5.7517	6.4923	5.2123	4.604	5.3096	4.5898	4.7918	5.1719
metab_1075	pos_1079	518.186	1.5362	0.6887	0	0	3.7123	3.745	3.6546	3.7508	3.6766	3.686	5.7659	5.3788	5.0216	5.5598	5.1426	5.3977
metab_1076	pos_1080	285.144	0.7467	1.1062	0.014	0.0229	5.7677	6.1113	5.2695	5.9283	5.7947	5.7026	5.2797	5.2104	5.8446	4.9651	5.1588	4.7956
metab_1077	pos_1081	398.144	1.2121	0.7508	0.0069	0.0124	4.0411	3.6217	5.8158	4.5475	5.0228	2.9449	5.5365	5.646	6.0456	5.7305	5.912	5.7474
metab_1078	pos_1082	330.144	1.2354	0.8209	0.0002	0.0007	5.7033	5.0271	5.9208	5.237	6.0729	4.9684	6.937	6.3616	6.5765	6.6067	6.693	6.9333
metab_1079	pos_1083	264.123	0.9733	0.8952	0	0.0001	6.0554	5.94	5.9444	5.9375	5.9784	5.8092	6.8713	6.3436	6.5609	6.5563	6.6459	6.8617
metab_1080	pos_1084	196.097	0.8523	1.1165	0.0007	0.0018	6.1023	5.8927	5.7702	5.8417	5.7267	5.5039	4.9861	5.4301	4.8532	5.1723	5.392	5.3676
metab_1082	pos_1086	204.123	1.0091	1.1754	0.0032	0.0063	6.8645	6.2496	5.5756	6.3709	5.6401	6.2432	5.5729	5.3238	4.8334	5.084	5.6377	4.9739
metab_1083	pos_1087	361.208	1.2594	1.246	0	0	5.7207	5.611	5.7842	5.7269	5.905	5.7485	4.3588	4.6906	4.6096	4.931	4.6516	4.4434
metab_1084	pos_1088	171.065	0.8109	1.1559	0.0493	0.0699	5.4254	5.0201	7.1077	5.4679	5.3577	5.1166	4.2412	4.9592	4.8622	4.9028	5.0928	4.9228
metab_1085	pos_1089	324.165	0.8969	1.2166	0.0262	0.0397	6.1467	5.1217	4.2254	5.2242	4.6379	4.3298	3.9717	4.8596	3.7428	3.7873	3.8597	4.182
metab_1086	pos_1090	490.191	1.4409	0.7479	0.0002	0.0007	5.3057	3.6693	5.3261	4.7718	5.3164	4.5085	6.5759	6.0019	6.4674	6.4045	6.4001	6.7821
metab_1088	pos_1092	355.099	1.7489	1.9462	0.0011	0.0025	5.0972	3.8762	6.8148	5.1556	5.1186	4.9889	1.7525	3.5165	3.2849	3.8199	1.8251	1.7534
metab_1089	pos_1093	256.129	1.4567	0.7507	0.0001	0.0003	5.1505	4.4024	5.4191	4.864	5.3887	4.1852	6.9481	6.301	6.0195	6.5651	6.5533	6.7901
metab_1090	pos_1094	416.191	1.1528	0.8764	0.0001	0.0002	7.5441	6.685	7.2448	7.0436	7.1455	7.0788	8.4792	7.8388	8.2623	8.1967	7.9231	8.0746
metab_1092	pos_1096	137.06	0.2012	0.9776	0.5078	0.5577	6.572	5.6099	5.828	5.8758	5.5623	5.4157	5.6708	6.0402	6.1533	5.7265	6.2545	5.8179
metab_1093	pos_1097	479.187	0.7824	1.1084	0.0047	0.0088	5.5078	5.6692	6.1078	5.6715	5.7226	6.0976	5.3617	4.7388	5.3028	5.6093	5.2661	5.0937
metab_1094	pos_1098	305.134	1.0489	1.2482	0.0015	0.0032	4.6427	3.9825	5.0668	4.7901	5.4014	4.8465	3.6443	3.7286	4.3044	3.6223	3.8736	3.8428
metab_1095	pos_1099	142.034	0.2149	0.9683	0.4593	0.5115	4.6652	4.8303	5.8657	4.7143	4.5966	4.6337	4.8113	5.1009	4.9893	4.9876	5.1457	5.2314
metab_1096	pos_1100	318.154	1.7893	1.6575	0	0	5.8662	6.0463	5.474	5.963	5.7719	5.7549	3.7133	3.7831	2.861	3.7346	4.0444	2.905
metab_1099	pos_1103	208.096	0.8256	1.1046	0.0002	0.0006	5.9721	5.6792	5.7715	5.6484	5.5822	5.7359	4.9581	5.4203	4.9725	5.2647	5.2201	5.2982
metab_1100	pos_1104	298.128	1.3039	1.247	0	0	6.2684	6.3246	5.926	6.4068	6.251	6.5903	4.8282	5.1501	4.9646	5.0918	4.9082	5.3467
metab_1101	pos_1105	346.197	1.1532	1.2261	0.0001	0.0003	5.5895	5.6214	5.5403	5.5235	5.5454	5.3722	5.1722	4.7137	4.0665	4.3814	4.4804	4.2588
metab_1102	pos_1106	146.117	0.946	1.1598	0.0012	0.0027	5.7767	5.9227	5.0497	5.7799	5.4459	5.7836	4.3431	4.9137	4.8937	4.8032	5.0807	5.0732
metab_1103	pos_1107	254.138	0.8993	0.9146	0.0023	0.0048	7.5084	7.3369	7.5857	7.7836	8.0959	7.3988	8.9389	8.331	8.0406	8.1612	8.1295	8.3727
metab_1104	pos_1108	270.133	0.0857	1.0098	0.7361	0.7714	5.9835	6.2155	5.7042	6.1667	6.3308	6.1669	6.5716	6.0183	5.7196	6.0996	5.5903	6.2145
metab_1105	pos_1109	198.534	0.491	0.8967	0.277	0.3256	5.2138	3.7837	4.7306	4.3149	4.3818	4.1927	3.4221	5.7191	5.6353	5.7158	5.0858	4.1024
metab_1106	pos_1110	359.181	0.6435	0.9208	0.0336	0.0496	5.2603	5.1994	5.3679	5.565	6.0852	5.3947	5.8639	6.3913	5.644	5.5671	6.3154	5.9157
metab_1107	pos_1111	195.123	1.125	1.2202	0.0002	0.0005	5.3689	5.6963	5.5229	5.6171	5.4968	5.6775	3.7654	4.706	4.6029	4.5861	4.8046	4.8867
metab_1108	pos_1112	186.124	0.4596	0.9471	0.1382	0.1746	6.3027	6.4327	6.8086	6.4959	6.2967	6.1146	7.2485	7.2232	5.998	6.7397	6.9794	6.4111
metab_1112	pos_1116	260.16	1.9739	1.7557	0	0	6.4522	6.4329	6.3686	6.489	6.5716	6.4082	3.2663	4.6232	4.2912	3.2677	3.34	3.2672
metab_1113	pos_1117	260.076	1.2647	1.2696	0.0002	0.0006	5.8703	5.2076	6.6261	5.8921	6.442	5.7557	4.4663	4.7511	4.6653	4.6025	5.0633	4.6466
metab_1114	pos_1118	247.111	1.4574	1.4031	0.0014	0.0031	6.1446	6.6045	5.3678	6.5336	6.0332	6.5531	4.7762	5.7666	3.5477	3.5673	4.8988	3.9804
metab_1116	pos_1120	203.139	1.5272	1.345	0	0	6.525	6.536	6.4112	6.5776	6.6883	6.4435	5.1782	5.3985	4.4945	4.4558	4.8447	4.7601
metab_1117	pos_1121	384.165	1.0307	0.8257	0.0095	0.0164	4.7862	4.3691	4.9931	4.9267	5.8379	4.5032	6.4092	5.5485	6.1062	5.3807	6.8142	5.3716
metab_1118	pos_1122	402.175	0.977	0.8699	0.0059	0.0108	5.9917	5.2602	5.7986	5.983	6.5611	5.782	7.1348	6.3973	6.8133	6.5506	7.4717	6.3008
metab_1120	pos_1124	88.0761	0.4858	1.0354	0.0092	0.0159	6.7372	6.7046	6.6481	6.702	6.7597	6.612	6.6237	6.4661	6.4261	6.683	6.2459	6.3477
metab_1121	pos_1125	279.133	1.8693	1.6104	0	0.0001	6.874	7.2512	6.1796	7.1213	6.6348	7.2356	4.6618	5.3272	3.2877	3.7429	4.6575	3.968
metab_1122	pos_1126	339.105	0.8865	0.8672	0.0102	0.0174	5.476	4.7446	4.3907	4.824	5.0718	4.9913	5.0072	5.8582	6.1223	5.4225	6.1713	5.4342
metab_1123	pos_1127	314.087	1.5407	1.5577	0.0001	0.0004	5.3492	4.4719	5.6024	4.9246	5.3885	4.8125	2.7423	4.2126	3.2263	3.276	3.6047	2.5498
metab_1125	pos_1129	428.154	0.1819	0.9737	0.6127	0.6567	5.5205	5.0318	5.576	5.4577	5.8004	5.4306	6.0412	6.2862	4.4946	5.3809	5.9866	5.5156
metab_1126	pos_1130	203.118	1.2544	0.7518	0.0061	0.0111	5.9399	4.185	4.0629	5.0878	3.9191	3.7998	6.7126	5.9048	5.4373	5.7311	6.7869	5.3287
metab_1127	pos_1131	362.121	1.1451	0.7749	0.0016	0.0036	4.7499	3.8086	3.7101	3.9811	3.7321	3.7523	4.9829	5.4814	5.3347	4.8864	5.7032	4.2393
metab_1128	pos_1132	423.197	0.3826	0.9228	0.3968	0.4488	4.3237	3.9491	4.6919	4.7908	5.7393	4.4034	5.7829	5.9839	3.5443	5.3696	4.7624	4.7895
metab_1129	pos_1133	139.039	0.8681	0.8899	0.0021	0.0044	5.7048	5.2311	5.8107	5.3716	5.4026	5.3985	6.4156	6.3094	6.1991	5.9335	6.5241	5.6154
metab_1130	pos_1134	442.006	1.8143	0.5854	0	0.0001	4.6308	3.1518	3.0615	3.1576	3.0835	3.6856	6.2265	6.1147	6.0284	5.7349	6.277	5.0994
metab_1131	pos_1135	145.076	0.2516	1.031	0.2667	0.3147	4.887	4.7922	4.1344	4.7998	4.7726	4.7222	4.7019	4.4296	4.6221	4.4721	4.5385	4.5001
metab_1132	pos_1136	376.16	0.1141	1.0201	0.7273	0.7629	4.5215	4.7811	3.9784	4.935	5.12	4.6598	4.0814	4.861	4.3622	4.1386	5.3493	4.6541
metab_1133	pos_1137	246.112	0.3492	1.0753	0.4592	0.5115	3.9351	3.8487	5.9988	4.1745	4.6707	3.7749	4.4755	3.8574	4.3686	3.3694	4.683	3.7957
metab_1134	pos_1138	107.077	1.2866	1.5484	0.0044	0.0084	5.611	5.0772	3.0372	4.9375	3.5419	3.7162	2.7663	2.8738	2.7231	2.7676	2.8399	2.7671
metab_1135	pos_1139	318.118	0.8877	0.8253	0.0307	0.0457	3.4388	3.4714	5.1868	3.4773	4.9145	4.1425	5.2823	4.8533	4.5737	4.7918	4.9129	5.4313
metab_1136	pos_1140	219.113	0.7052	1.1012	0.0098	0.0169	4.514	4.9702	5.3906	4.9919	5.0344	5.1221	4.7399	4.825	4.4935	4.2396	4.502	4.4664
metab_1137	pos_1141	373.115	1.1103	0.8048	0.0156	0.0252	5.6768	4.2553	5.5605	4.2611	5.5848	5.0863	7.2126	6.428	4.8467	6.4825	6.6915	6.1462
metab_1138	pos_1142	400.196	0.2101	0.9818	0.4203	0.4727	5.9653	5.756	6.0176	5.766	5.9187	5.7944	6.1345	5.4903	6.3643	6.1109	5.8514	5.9247
metab_1139	pos_1143	126.055	0.1524	1.0135	0.5296	0.5786	5.8905	5.8591	6.1495	6.1149	6.629	5.8861	5.9728	6.0612	5.9304	5.9328	6.1545	5.9899
metab_1140	pos_1144	312.144	0.8616	0.8904	0.0019	0.0041	5.3474	4.7359	5.237	5.0954	5.5859	4.9613	5.8786	5.9706	5.4026	5.9455	5.6566	5.9141
metab_1141	pos_1145	184.097	0.7289	1.0849	0.0002	0.0006	5.0561	5.1613	5.5111	5.1948	5.1797	5.2518	4.7822	4.9744	4.792	4.7544	4.7561	4.843
metab_1142	pos_1146	418.229	1.0876	1.2656	0.0044	0.0083	4.1451	4.875	4.6709	5.4699	5.2554	5.6624	4.0831	4.317	4.194	3.4251	4.3199	3.4246
metab_1143	pos_1147	320.181	1.7837	1.7696	0.0003	0.0008	5.6054	5.6606	5.7714	5.7534	5.927	5.7596	4.2277	3.3828	4.3163	1.865	3.8275	1.8645
metab_1144	pos_1148	358.149	1.2424	0.7392	0.0071	0.0126	4.1127	3.0361	4.6584	3.6956	5.4697	3.5322	5.9467	5.4487	4.6436	5.2359	6.3134	5.5632
metab_1145	pos_1149	397.11	0.0213	0.9963	0.945	0.9546	5.4759	4.1681	5.3124	4.7286	5.0494	4.1964	4.5322	5.1942	4.6914	4.6928	5.1712	4.7566
metab_1146	pos_1150	155.07	0.4188	1.0559	0.1743	0.2149	5.0907	5.128	6.0084	5.0872	5.0908	5.0127	5.2243	4.9129	4.5162	4.8568	5.0023	5.2389
metab_1147	pos_1151	262.164	0.8508	1.2164	0.0421	0.0608	5.6617	4.8686	4.3339	4.7072	4.8639	4.5685	4.9681	4.445	3.0232	3.0677	4.3399	3.9983
metab_1148	pos_1152	251.136	1.1603	1.2603	0.0004	0.001	5.6992	5.5396	4.7923	5.4876	4.9167	5.5439	4.6911	3.9944	3.8702	4.1582	4.627	4.0312
metab_1149	pos_1153	684.27	0.8951	0.8601	0.0122	0.0204	4.8358	4.8684	4.7781	4.8743	4.8001	4.8095	4.5067	5.947	5.4294	5.5349	5.946	6.3114
metab_1150	pos_1154	405.201	1.4506	1.4014	0	0.0001	5.363	5.3251	5.6424	5.5981	5.5817	5.3322	3.5338	4.7168	3.4906	3.5352	3.9542	4.2068
metab_1151	pos_1155	203.118	1.1799	0.795	0.0008	0.002	4.6602	4.7608	4.7125	4.5614	4.3328	4.249	6.3098	5.2022	5.4636	5.3864	6.5684	5.3748
metab_1152	pos_1156	276.159	1.154	1.2475	0.0023	0.0048	6.3356	5.7014	5.8322	5.6421	5.2098	5.4782	4.907	5.2411	4.757	4.7463	4.0253	3.7401
metab_1153	pos_1157	522.218	2.0064	0.5848	0	0	4.6283	3.5379	4.8104	3.5438	4.2395	3.7211	6.3764	6.976	7.0054	6.7711	7.3357	7.3972
metab_1154	pos_1158	324.144	0.4514	1.0845	0.2401	0.2862	4.9454	4.3599	5.14	4.6768	5.6423	4.5842	5.1664	4.4527	4.3209	3.9342	5.2739	3.9148
metab_1155	pos_1159	345.152	0.1671	1.0153	0.5316	0.5805	5.7979	5.4984	6.1109	5.7574	6.1192	5.7088	5.4489	6.0593	5.8077	5.9203	5.6112	5.6195
metab_1156	pos_1160	194.037	0.6121	0.9163	0.0907	0.1204	6.355	5.065	5.1022	5.667	5.3245	5.3788	6.7265	6.0053	5.5438	5.7407	6.2471	5.6337
metab_1157	pos_1161	329.17	0.7352	1.1091	0.017	0.0272	5.3952	5.441	5.6569	5.5065	5.8917	5.3538	4.8811	5.7024	4.633	4.534	5.1322	5.0941
metab_1158	pos_1162	266.138	1.0485	1.181	0.0027	0.0055	7.2965	6.5694	6.2031	6.5605	5.9173	5.7073	5.5304	5.5767	5.0075	5.3333	5.4357	5.5108
metab_1159	pos_1163	332.171	1.139	0.7824	0.0016	0.0036	4.7673	3.6989	4.0902	4.0869	3.8415	3.411	5.2928	5.1003	4.803	5.5862	4.3843	5.3777
metab_1160	pos_1164	321.144	1.0457	0.8455	0.0038	0.0074	5.9848	4.924	5.8934	5.3404	5.7729	4.4532	6.5159	6.1105	6.5608	6.5153	6.1003	6.485
metab_1161	pos_1165	393.223	0.0415	0.9945	0.8737	0.8939	5.5735	5.2507	5.6933	5.568	6.1355	5.2619	5.6839	6.1608	5.1431	5.6334	5.5407	5.5062
metab_1162	pos_1166	419.18	0.354	0.9182	0.4463	0.4984	3.9752	3.6927	5.0969	3.8708	5.06	3.6337	5.3959	4.786	3.6167	3.594	5.916	4.2787
metab_1163	pos_1167	183.091	0.9856	0.7666	0.0562	0.0784	5.5293	2.2433	4.626	4.4305	4.166	2.3604	5.2341	4.8142	5.2885	5.2494	4.6294	5.2546
metab_1164	pos_1168	373.196	0.1782	1.0243	0.6606	0.701	5.2554	5.3269	4.916	5.556	5.6487	5.478	5.4347	6.3562	4.6014	5.3031	4.9944	4.7296
metab_1165	pos_1169	436.181	1.6625	0.6315	0.0004	0.0011	5.4871	3.2984	4.1172	3.5695	3.1826	3.192	5.5009	5.611	6.5726	5.5871	6.8045	6.1054
metab_1166	pos_1170	362.099	0.5562	0.8826	0.2807	0.3298	3.4983	3.5309	3.4406	4.6306	5.8465	4.7212	4.4572	4.5184	4.0192	6.1962	4.8132	5.0776
metab_1167	pos_1171	272.072	0.3488	0.9633	0.2335	0.2791	5.7522	5.7849	5.6945	5.7907	5.7165	5.7259	5.4232	6.2791	5.7685	5.6191	6.1873	6.503
metab_1168	pos_1172	218.138	0.8115	1.1172	0.0014	0.0032	5.8304	5.5876	5.4423	5.4658	5.1622	5.4593	4.5829	4.9301	4.8645	4.7655	5.0764	5.2706
metab_1169	pos_1173	152.07	0.038	0.997	0.838	0.8628	5.9465	5.784	6.2175	5.8615	6.0921	5.7549	5.9494	6.0175	5.7635	6.0527	6.0506	5.9317
metab_1170	pos_1174	185.071	1.1366	1.2537	0.0008	0.0019	5.3863	5.4291	4.8088	5.3098	5.04	5.3647	4.4181	4.5684	3.8552	4.0583	4.6897	3.404
metab_1171	pos_1175	233.117	0.6583	0.9062	0.0606	0.0839	6.1335	4.7397	5.3148	5.2394	5.2222	4.5457	5.3459	6.1387	5.5163	5.7571	5.9616	5.7033
metab_1172	pos_1176	297.028	1.4837	1.3923	0	0	5.617	5.9446	5.2564	5.7775	5.365	5.6201	4.1761	4.3242	4.0751	3.5867	4.0019	3.9551
metab_1173	pos_1177	427.157	0.3667	0.9524	0.2942	0.3437	6.0698	4.741	5.0815	5.2868	5.1799	4.7058	5.2574	5.6214	5.0538	5.4318	5.3822	5.8671
metab_1174	pos_1178	183.065	0.6985	1.068	0	0	5.6575	5.611	5.6115	5.652	5.6182	5.5672	5.1741	5.3294	5.1756	5.2309	5.2915	5.373
metab_1175	pos_1179	380.155	1.1894	1.3188	0.0011	0.0026	5.3024	4.2535	5.2603	4.9652	5.6238	4.2607	3.9445	3.7635	3.9217	4.108	3.4148	3.3419
metab_1176	pos_1180	238.071	0.5126	0.9044	0.2675	0.3155	4.4792	3.286	5.3451	4.9923	5.7588	4.1695	4.9944	4.3147	4.9566	5.5845	5.7511	5.3955
metab_1177	pos_1181	208.108	0.8576	0.8422	0.0446	0.064	4.6866	4.6221	4.9498	4.7431	5.0413	4.4847	6.3274	6.6182	3.9534	5.6696	5.7797	5.5261
metab_1178	pos_1182	187.086	0.1757	1.0208	0.6021	0.6471	5.9958	5.8371	6.0447	5.6805	5.4191	5.7076	6.2126	5.3396	5.3065	5.5686	6.3257	5.224
metab_1179	pos_1183	391.207	0.1447	1.015	0.6963	0.7336	6.6797	6.6664	6.2112	6.7292	6.7737	6.6397	6.6646	7.4706	5.7681	6.5166	6.4685	6.2229
metab_1180	pos_1184	216.086	0.2536	1.0325	0.4052	0.4573	4.989	4.6358	5.5552	4.94	5.3861	4.5717	5.0022	4.6849	4.9366	4.6866	5.1628	4.6544
metab_1181	pos_1185	151.039	0.5831	0.952	0.0022	0.0046	5.9104	5.9412	5.8558	5.8439	5.7914	5.7444	6.0276	6.2312	5.985	6.0158	6.2025	6.3944
metab_1184	pos_1188	159.091	0.0905	1.0088	0.7467	0.7813	6.1041	6.2375	6.1604	6.2422	5.9499	6.3898	6.2975	5.8215	6.7238	6.0156	5.7116	6.193
metab_1185	pos_1189	251.136	1.4109	1.3527	0.0001	0.0003	6.2258	6.1864	5.26	6.1101	5.4785	6.1097	4.6985	5.0055	3.7965	4.1502	4.2558	4.2434
metab_1186	pos_1190	154.042	0.4577	1.024	0.0029	0.0058	7.8409	7.9877	7.8512	7.9557	7.7531	8.0541	7.7011	7.7523	7.6868	7.6933	7.744	7.7563
metab_1187	pos_1191	119.073	0.4696	1.0306	0.0021	0.0044	6.3833	6.5143	6.3704	6.4837	6.2816	6.5709	6.2164	6.2754	6.1924	6.2211	6.2739	6.2776
metab_1188	pos_1192	202.044	0.4531	1.0238	0.0035	0.0069	7.8587	8.013	7.8719	7.9736	7.7744	8.0794	7.7236	7.7785	7.7053	7.7104	7.7673	7.7849
metab_1189	pos_1193	157.042	0.4624	1.0309	0.0037	0.0072	6.3015	6.4587	6.3266	6.4165	6.2041	6.5275	6.1729	6.2199	6.1245	6.1421	6.2109	6.2174
metab_1190	pos_1194	156.039	0.4601	1.0257	0.0028	0.0056	7.361	7.5072	7.3679	7.472	7.2738	7.577	7.2188	7.2687	7.2027	7.2132	7.2626	7.2734
metab_1191	pos_1195	437.033	0.6012	1.0691	0.0161	0.0259	5.6145	5.9839	5.5675	5.8703	5.5244	5.9871	5.1663	5.5904	5.0367	5.4208	5.5323	5.5708
metab_1192	pos_1196	393.223	0.7329	1.0958	0.0108	0.0183	6.23	6.0765	5.6059	6.2133	6.3335	6.1788	5.824	6.005	5.0707	5.6416	5.479	5.4134
metab_1193	pos_1197	332.181	0.9013	1.1495	0.0062	0.0114	5.8349	5.8346	5.8295	5.9095	6.0087	5.9754	6.0082	5.1604	4.5254	5.3793	4.6315	5.0896
metab_1194	pos_1198	557.183	2.1519	0.5234	0	0.0001	5.1014	3.0881	2.9979	3.094	4.9967	3.0292	6.7356	7.1731	7.0425	7.376	7.1178	7.1755
metab_1195	pos_1199	383.131	0.9657	1.1438	0.0004	0.0011	6.4225	6.0797	5.6762	6.0135	5.8892	6.2326	5.0155	5.6288	5.2811	5.179	5.5424	5.0985
metab_1196	pos_1200	310.164	0.8924	1.1286	0.0035	0.0068	6.6358	6.2415	6.0074	6.1592	5.9576	6.1112	5.4536	5.9854	5.2825	5.8915	5.2605	5.0059
metab_1197	pos_1201	455.188	0.3845	1.0461	0.2247	0.2699	6.6567	5.7388	5.7471	5.9423	5.7599	5.6845	5.4543	6.1109	5.7844	5.6309	5.8184	5.1654
metab_1199	pos_1203	202.086	0.7999	1.1506	0.0381	0.0555	5.3185	5.5195	6.0126	5.4068	5.1824	5.3471	5.592	4.3943	3.9808	4.677	5.5482	4.2999
metab_1200	pos_1204	251.102	0.4927	1.0751	0.201	0.2442	5.5365	5.0713	5.9575	6.3156	7.0321	5.7323	5.8002	5.6095	5.7707	5.1063	5.6847	5.1854
metab_1201	pos_1205	358.149	0.7358	0.9105	0.0111	0.0187	5.6764	5.0794	5.6214	5.2331	5.4851	4.8829	5.6404	5.9421	5.4573	5.8839	6.0027	6.1975
metab_1202	pos_1206	413.141	0.4668	1.0572	0.1474	0.1848	6.0638	5.4708	6.4713	5.719	5.8258	5.5802	5.474	5.7457	5.9923	5.0127	5.618	5.3838
metab_1203	pos_1207	317.12	0.026	0.983	0.9061	0.9219	4.2588	2.73	5.8176	3.7608	3.6952	2.6711	4.2971	4.406	3.1699	3.9237	4.534	2.9976
metab_1204	pos_1208	387.175	0.0065	0.9959	0.9569	0.9646	4.8529	4.5789	6.2228	5.0005	5.5515	4.3002	5.6177	5.9841	4.3109	5.0504	4.8439	4.8251
metab_1205	pos_1209	326.123	1.3348	0.7574	0.0002	0.0005	4.486	3.6462	4.8402	4.0771	5.1401	4.034	5.839	6.0302	5.5945	5.4972	5.7783	5.8839
metab_1206	pos_1210	455.115	0.07	0.977	0.8285	0.8543	5.4438	3.928	6.7646	4.7078	4.2758	3.8691	4.5836	5.421	5.2246	5.2036	5.3433	3.899
metab_1207	pos_1211	379.177	0.3459	1.0697	0.4385	0.4908	6.0681	4.4342	5.3771	4.8751	5.3024	3.7763	4.8392	5.5319	3.7552	4.5107	4.6893	4.5611
metab_1208	pos_1212	234.097	0.8775	0.8517	0.0203	0.0318	4.7695	3.5379	5.035	4.5553	4.9224	4.4399	5.8035	4.5213	5.6311	5.1862	5.4536	5.4069
metab_1209	pos_1213	594.275	0.544	1.1483	0.3027	0.3526	6.6956	3.7356	4.6425	5.4716	3.7495	3.6767	3.374	4.8488	4.0204	4.3799	4.3613	3.3749
metab_1210	pos_1214	237.087	0.831	1.1316	0.0003	0.0009	4.8083	4.7022	4.7109	4.8911	5.026	4.8991	4.0961	4.3399	4.0929	4.2293	4.6975	4.2081
metab_1211	pos_1215	281.149	1.3767	1.3732	0	0.0001	5.0745	5.3151	5.077	5.3968	5.0566	5.4558	3.7119	4.3134	3.1072	4.1776	4.0139	3.5225
metab_1212	pos_1216	210.112	0.8809	1.1219	0.0001	0.0004	6.0241	5.439	5.6366	5.5732	5.6053	5.4024	4.9512	5.1631	4.9264	4.9607	4.9324	5.0847
metab_1213	pos_1217	592.259	0.313	1.0471	0.4631	0.5151	7.2074	5.7625	6.1032	6.3328	5.914	4.9506	5.173	6.2025	5.756	6.0469	6.2097	5.2498
metab_1214	pos_1218	264.18	0.7866	0.9073	0.0154	0.025	6.0841	6.4984	6.2456	6.3866	6.2314	6.3658	7.8337	7.1011	6.2789	6.6884	6.7652	7.0101
metab_1215	pos_1219	163.075	0.7215	0.9279	0.0018	0.0038	6.0607	5.7971	6.1847	5.881	5.97	5.7252	6.2884	6.6395	6.4315	6.0489	6.5194	6.4526
metab_1216	pos_1220	472.181	1.3779	0.7419	0.0021	0.0044	5.2434	3.4635	4.6296	4.6365	5.3854	4.5133	6.1607	6.797	5.1481	6.5358	5.9129	7.0092
metab_1217	pos_1221	155.07	0.2097	1.0161	0.2869	0.3363	5.5182	5.2859	5.3158	5.3475	5.3877	5.2779	5.2828	5.5501	5.1751	5.1238	5.3483	5.1428
metab_1219	pos_1223	239.102	0.6015	1.0799	0.0371	0.0542	5.0151	5.5153	5.084	5.6841	5.8496	5.4362	5.1689	5.0792	5.2902	5.1448	4.8745	4.6144
metab_1220	pos_1224	184.097	0.6838	1.073	0.0001	0.0005	5.6877	5.4008	5.4274	5.4789	5.5692	5.3297	5.1707	5.0718	5.0075	5.0908	5.24	5.0742
metab_1221	pos_1225	608.253	0.9418	1.2579	0.0689	0.0939	6.9058	4.6436	5.746	5.9926	4.9177	3.7817	3.4791	5.2735	3.6992	4.6043	4.6449	3.7289
metab_1222	pos_1226	254.102	0.7844	0.9126	0.0012	0.0028	5.2671	5.1019	5.4213	5.3125	5.6761	5.1517	5.9515	5.6058	5.601	6.0321	5.8294	5.9727
metab_1224	pos_1228	354.118	0.1932	1.0308	0.5767	0.6239	6.3017	4.7902	5.0664	5.6634	5.3119	4.6173	5.0169	4.84	5.4775	5.1204	5.3992	4.9512
metab_1225	pos_1229	295.165	1.6095	1.4567	0	0	5.9518	5.8758	6.072	5.8452	6.0579	5.7008	4.416	3.8981	4.2065	4.4111	3.5243	3.9158
metab_1226	pos_1230	225.123	1.21	1.2081	0	0	6.0227	5.926	5.9338	6.0727	6.0537	6.0766	5.0762	5.2804	5.0237	4.905	4.8314	4.7522
metab_1227	pos_1231	190.05	1.0307	1.15	0	0	5.8882	5.6543	6.0413	6.0819	5.7169	5.7711	5.0583	5.0603	5.034	5.1209	5.133	5.1605
metab_1228	pos_1232	158.096	0.1918	1.0137	0.3498	0.4007	5.5909	5.8411	5.6379	5.7459	5.5782	5.757	5.6688	5.5555	5.8552	5.4387	5.7117	5.4601
metab_1229	pos_1233	384.14	1.3937	0.7248	0.0006	0.0015	4.3877	3.2842	4.7724	3.8202	4.8762	3.6008	5.8777	5.1512	5.2029	5.7933	6.183	5.9331
metab_1230	pos_1234	167.107	1.2922	1.2515	0	0	5.7469	6.0847	5.6783	5.9025	5.7169	6.0071	4.6183	4.8185	4.6462	4.6114	4.738	4.6396
metab_1231	pos_1235	561.194	1.554	0.7057	0	0.0001	5.2483	4.0971	4.0068	4.103	4.0288	4.0382	5.7804	5.9567	6.4084	5.8642	6.0452	6.1157
metab_1232	pos_1236	324.155	1.0527	1.2366	0.0008	0.0019	4.6648	4.8576	4.6451	5.0293	4.7013	5.2951	4.6188	3.3896	3.8782	4.0836	3.8664	3.7709
metab_1233	pos_1237	225.11	0.9011	1.1285	0.0007	0.0017	5.814	6.1464	5.9109	5.9573	5.8324	6.0209	5.5728	4.7085	5.4649	5.3076	5.4657	5.1008
metab_1234	pos_1238	265.154	1.5161	1.3516	0	0	6.1805	6.1727	6.3588	6.1674	6.328	5.9479	4.7028	4.9051	4.6062	4.4122	4.3635	4.5021
metab_1235	pos_1239	367.136	1.8207	0.5967	0.0003	0.0008	5.1764	2.5225	4.5064	3.8317	4.8517	2.4637	6.4812	6.3829	6.5382	6.3289	6.6279	6.7778
metab_1236	pos_1240	597.215	0.2248	0.9606	0.6	0.6452	6.9241	5.264	5.8572	5.9911	5.7258	4.1452	5.3196	6.6854	5.5914	6.2241	5.9522	5.5254
metab_1237	pos_1241	302.207	1.7474	1.7185	0	0	5.1789	5.1886	5.4372	4.9439	5.0787	4.7548	2.9425	3.0501	2.8994	2.9439	3.0162	2.9434
metab_1238	pos_1242	211.096	0.7421	0.9218	0.0001	0.0003	5.2207	5.0663	5.2422	5.0853	5.1718	4.9616	5.6634	5.6735	5.3886	5.6251	5.6176	5.391
metab_1239	pos_1243	450.196	1.0941	0.7937	0.0156	0.0252	5.8219	3.7274	4.3741	4.7733	4.9303	4.0992	4.6646	6.486	5.7167	5.5089	6.5222	6.0354
metab_1240	pos_1244	178.122	1.6605	1.9231	0.0003	0.0009	5.9972	5.0769	4.0723	5.2382	3.267	3.9593	2.3301	2.4374	2.525	2.3315	2.4036	2.331
metab_1241	pos_1245	144.081	0.9998	1.1774	0.0109	0.0184	7.7312	6.7834	5.982	7.0882	6.0594	5.8227	5.7502	5.4097	5.9039	5.4422	5.5414	5.4776
metab_1242	pos_1246	505.225	0.2077	1.0282	0.5443	0.5927	5.8986	4.9127	5.9675	5.3026	5.6852	4.8538	5.3796	5.5851	5.1661	5.5371	4.7247	5.3361
metab_1243	pos_1247	522.218	2.0205	0.5497	0	0	3.6181	3.4697	3.3794	3.6843	3.4014	3.4108	5.9272	6.5132	6.2683	6.0652	6.6133	6.7476
metab_1244	pos_1248	381.115	0.8111	0.9015	0.0033	0.0066	6.0082	5.2988	5.6117	5.4822	5.387	5.0596	5.9996	6.1405	6.0686	5.9881	6.4356	5.8061
metab_1245	pos_1249	102.128	1.2291	0.7623	0.0006	0.0016	4.0116	4.3291	4.4207	4.147	3.6617	3.9819	6.392	5.4726	5.0317	4.6926	5.1933	5.4267
metab_1246	pos_1250	206.063	0.2332	0.9507	0.5168	0.5665	4.3076	4.2364	4.5906	4.0417	3.0556	4.1866	5.3389	4.1321	3.7466	4.2831	4.2723	3.9125
metab_1247	pos_1251	276.144	0.6937	1.1114	0.0371	0.0542	5.9491	5.6797	4.9457	5.6559	5.3018	5.6439	5.0821	5.5475	4.25	4.8193	5.2594	4.8903
metab_1248	pos_1252	398.144	0.6582	0.8955	0.1273	0.1625	5.8104	4.4741	5.5861	5.2764	6.3828	4.5684	6.2803	5.7226	5.4038	5.7947	6.9334	5.707
metab_1249	pos_1253	384.14	1.4415	0.704	0.0046	0.0086	5.2763	3.2793	5.7668	3.7694	5.0708	3.4681	6.4021	5.4351	5.5261	6.7952	7.0803	6.5853
metab_1250	pos_1254	163.039	0.8024	1.1136	0.0255	0.0389	6.7338	6.5581	7.0048	7.4623	8.1195	7.1063	6.1707	6.289	6.0879	6.8685	6.203	6.9787
metab_1251	pos_1255	214.107	0.1486	0.9882	0.4081	0.4602	5.2728	5.3161	5.4802	5.2528	5.1703	5.2502	5.4128	5.3279	5.2161	5.1807	5.568	5.4114
metab_1252	pos_1256	353.086	0.6736	1.18	0.1333	0.1692	4.7833	3.8621	4.1609	5.5306	6.409	4.876	4.7686	3.6082	3.4573	4.6861	3.754	4.8326
metab_1253	pos_1257	213.112	0.5834	0.9233	0.0466	0.0665	5.0937	5.0982	5.7803	4.9857	4.5007	4.9587	5.3217	5.3155	5.3459	5.6602	5.7583	5.5422
metab_1254	pos_1258	217.159	0.9731	0.8489	0.0041	0.0079	5.5741	4.7033	5.6477	4.6838	4.3966	4.6822	5.7526	5.7927	6.0431	6.1813	5.7266	5.4752
metab_1255	pos_1259	497.132	0.9199	1.157	0.0016	0.0036	6.0029	5.1265	5.6366	5.3557	5.3183	4.9764	4.8179	4.5028	4.9065	4.815	4.4275	4.5521
metab_1256	pos_1260	191.07	0.5759	1.0805	0.0639	0.0878	5.1717	5.0553	6.0874	5.0723	5.1109	4.8459	4.7243	5.0084	4.9124	4.6574	4.9245	4.7827
metab_1257	pos_1261	174.149	0.7495	1.1148	0.0343	0.0506	5.6847	5.6941	6.8561	5.6209	5.2624	5.5447	5.4268	5.3948	4.9629	4.8801	5.2598	5.1655
metab_1258	pos_1262	170.06	0.6596	1.08	0.0001	0.0004	4.5763	4.6223	4.5337	4.7022	4.483	4.7186	4.381	4.2106	4.2183	4.1369	4.2685	4.3771
metab_1259	pos_1263	411.126	1.2145	1.3508	0.0044	0.0084	5.6541	4.2035	6.4294	4.9635	5.0266	4.2664	4.1159	3.8172	3.9851	3.4412	3.6395	3.6165
metab_1260	pos_1264	205.044	0.3597	1.0553	0.3414	0.3925	4.4257	4.8626	5.9015	4.7737	4.2207	4.7853	4.7794	4.551	4.3546	4.3922	4.8929	4.4818
metab_1261	pos_1265	246.112	1.0037	1.1567	0	0.0001	5.4387	5.8941	5.3355	5.5795	5.5616	5.458	4.9199	4.9553	4.6342	4.6715	4.928	4.6534
metab_1262	pos_1266	359.228	1.3343	1.2728	0	0	5.696	5.8372	5.9528	5.728	5.9322	5.6567	4.5995	4.6083	4.5669	4.4257	4.5656	4.5752
metab_1263	pos_1267	709.267	2.1991	0.471	0	0	4.6718	2.8076	2.7174	2.8134	2.7393	2.7487	6.3403	6.591	6.6975	6.5785	6.3535	6.708
metab_1264	pos_1268	376.1	0.1057	1.0215	0.8304	0.8558	3.8391	4.1305	4.9141	4.7716	5.3862	2.8793	4.872	3.7912	3.8098	3.8562	4.7094	4.3331
metab_1265	pos_1269	563.147	0.9496	0.8507	0.0042	0.0081	4.5168	4.8835	5.402	4.7451	4.2338	5.107	5.5783	5.6369	6.005	4.971	5.8126	5.9586
metab_1266	pos_1270	218.138	0.7378	1.0751	0.0002	0.0007	6.0408	6.3839	6.2275	6.2394	6.1653	6.2171	5.6893	5.7025	5.6917	5.6368	5.9778	5.9684
metab_1267	pos_1271	527.173	0.5536	0.9409	0.0489	0.0693	5.8641	5.8967	5.8064	5.9025	5.8284	5.8378	5.535	6.5742	6.1265	6.0867	6.5843	6.4362
metab_1268	pos_1272	768.349	1.6013	0.6554	0.0001	0.0005	3.7875	3.9497	4.2266	3.8259	3.7517	3.7612	5.7336	6.7809	4.4676	6.5172	6.3078	5.7504
metab_1270	pos_1274	154.05	1.4356	1.2946	0	0	6.1557	6.4974	6.3381	6.277	6.2147	6.4301	4.9018	4.8617	4.8386	4.9198	5.0154	4.7477
metab_1271	pos_1275	439.193	0.2618	1.0469	0.5954	0.641	6.2771	4.5871	5.1605	5.3282	4.9495	4.6456	4.5453	5.9541	5.0413	5.2843	5.2172	3.52
metab_1272	pos_1276	450.196	1.5745	0.5649	0.0084	0.0147	4.6158	2.2748	5.0853	2.2806	2.2068	2.2162	4.3494	5.2397	6.4554	4.0627	7.0373	5.9195
metab_1273	pos_1277	497.132	0.1633	1.0195	0.6114	0.6557	6.4063	5.5119	5.8631	5.9504	5.9905	5.3504	6.0265	5.666	5.4766	5.5526	6.3213	5.3542
metab_1274	pos_1278	604.281	2.2276	0.4433	0	0	2.5165	3.0845	2.459	2.5549	2.4809	3.7784	5.9946	6.8825	5.8517	6.5115	6.3823	6.4412
metab_1275	pos_1279	209.153	0.7453	1.1029	0.003	0.0059	5.6616	5.2121	5.4959	5.2921	5.1917	5.1108	4.8917	4.6088	4.8334	4.7267	5.2516	4.6697
metab_1276	pos_1280	350.182	0.4671	0.9154	0.1717	0.212	3.9859	4.6528	4.7227	4.1801	4.5214	4.2173	5.6072	5.3086	4.485	4.9285	4.3741	4.0064
metab_1277	pos_1281	379.149	1.3479	0.7408	0.0055	0.0102	4.2046	3.2229	6.1439	5.0835	6.1782	4.4112	6.7829	6.3303	6.5585	6.8932	6.3062	6.6023
metab_1278	pos_1282	208.133	1.9932	1.794	0	0	6.1229	6.4853	6.4846	6.2902	6.0358	6.3538	3.28	3.8333	3.8557	2.9067	3.8798	3.3
metab_1279	pos_1283	277.118	0.6567	1.0863	0.0077	0.0137	5.3464	5.1035	5.5363	5.1151	4.9514	5.1439	5.0668	4.4482	4.9004	4.8569	4.5978	4.8433
metab_1280	pos_1284	329.138	1.4308	0.714	0	0.0001	4.313	3.6571	3.8301	3.8698	4.1023	3.2105	5.088	5.6342	5.4692	4.9837	5.6977	5.3119
metab_1281	pos_1285	317.138	1.3789	0.772	0	0	5.2807	4.5196	4.5934	4.3396	4.8896	4.6192	5.8502	6.2627	6.2211	5.8704	6.3847	5.9927
metab_1282	pos_1286	226.107	0.9214	0.8776	0.0022	0.0047	5.2175	4.9698	5.2372	5.0823	5.3444	4.9479	5.7167	5.6421	5.5629	5.8866	5.6503	6.6345
metab_1283	pos_1287	231.101	1.1834	1.3492	0.0147	0.024	6.1195	5.1136	5.6657	5.3558	5.0833	4.234	3.5425	4.3099	4.643	4.3943	4.3679	2.1395
metab_1284	pos_1288	137.06	1.0395	1.1296	0	0	6.7011	6.7373	6.7644	6.6711	6.7161	6.5101	5.8434	6.0288	6.0117	5.7417	6.0581	5.8122
metab_1285	pos_1289	446.202	0.956	1.5486	0.2119	0.256	6.1608	3.606	5.1351	5.2354	4.6674	0.7005	0.4772	4.4817	4.5455	4.5361	1.6418	0.7856
metab_1286	pos_1290	132.044	1.1826	1.3424	0.0002	0.0005	3.7959	4.0819	4.9295	4.3141	3.878	4.1448	3.3183	2.9843	3.2524	2.8781	3.2775	3.0206
metab_1287	pos_1291	242.117	1.1854	1.2594	0.0003	0.0008	5.0905	5.022	6.1708	5.2388	5.1585	5.567	4.6261	4.2621	3.8931	4.3793	4.294	4.1514
metab_1288	pos_1292	171.099	0.4309	1.0365	0.0162	0.0261	5.2559	5.5662	5.2432	5.5468	5.3573	5.5492	5.1775	5.2424	5.1968	5.1959	5.227	5.3314
metab_1289	pos_1293	373.125	1.4812	1.3756	0	0	5.3928	5.5984	6.1348	5.712	5.562	5.9266	3.9426	4.3766	4.4522	3.9178	4.2896	3.9732
metab_1290	pos_1294	195.065	1.0229	1.1414	0	0	5.9514	5.8743	6.1899	5.9078	5.834	6.0244	5.2333	5.2722	5.284	5.2178	5.1926	5.1503
metab_1291	pos_1295	240.054	1.7635	1.7235	0	0	4.7143	5.4061	5.7335	5.1849	5.0208	5.1715	3.198	2.9862	2.8355	3.0561	2.9523	3.0895
metab_1292	pos_1296	463.157	1.3494	1.3613	0.0003	0.0009	5.287	5.3108	5.45	5.5814	6.0048	5.3961	4.4688	4.351	3.964	2.8516	4.3806	4.2505
metab_1293	pos_1297	547.178	0.8533	0.9079	0.0032	0.0064	6.8429	6.4049	6.0198	6.3626	6.5871	5.8639	6.9382	6.9198	7.263	6.7667	7.1958	6.86
metab_1294	pos_1298	294.17	1.8218	1.7241	0	0.0001	5.4353	5.5558	6.8467	5.5684	5.4919	5.6765	3.1203	4.417	3.0771	3.1217	3.194	3.1212
metab_1295	pos_1299	595.165	0.462	1.0556	0.1112	0.1442	6.6792	6.3022	5.7189	6.3655	6.5654	6.5297	6.1057	6.3027	5.625	5.6534	6.0807	6.3847
metab_1296	pos_1300	163.075	1.0415	0.875	0.0002	0.0007	6.3086	5.8584	5.9533	6.0106	6.3854	5.6532	6.622	7.1904	6.9137	6.5828	7.1317	6.8907
metab_1297	pos_1301	320.16	1.518	1.4247	0	0.0001	5.7056	6.0011	5.3495	5.9279	5.4565	6.1361	4.5895	3.9479	4	4.1314	3.3738	4.2262
metab_1298	pos_1302	311.146	1.0259	1.2614	0.0182	0.0288	5.5629	5.2391	5.6788	5.0187	5.3751	4.7719	4.9261	3.6749	3.524	3.7487	5.6418	3.568
metab_1299	pos_1303	158.996	0.4863	0.9339	0.0969	0.1276	5.119	4.2912	4.9713	4.68	4.8634	4.1519	4.7792	5.3025	4.908	4.7927	5.1951	5.083
metab_1300	pos_1304	140.002	0.1282	0.9887	0.5927	0.6385	5.4283	4.9755	5.1305	5.119	5.34	4.9281	5.0269	5.4316	5.138	5.0137	5.3461	5.3244
metab_1301	pos_1305	428.154	0.3994	1.1129	0.4269	0.4795	5.5125	3.6119	5.6899	3.5873	3.8157	3.1481	3.9316	3.7936	2.8025	3.8874	4.8264	3.5502
metab_1302	pos_1306	367.136	1.6805	0.655	0	0	3.76	3.7926	3.8204	3.7984	4.1634	3.7337	5.6556	6.2317	5.2994	5.6014	6.1152	6.3141
metab_1303	pos_1307	438.132	0.538	0.913	0.1383	0.1748	4.6782	4.1058	4.8263	4.3866	4.6826	4.2745	4.9065	4.069	5.4378	4.6931	5.7174	4.6988
metab_1304	pos_1308	153.127	1.2062	1.2405	0	0.0001	5.533	5.9168	5.8017	5.4875	5.3846	4.9922	4.5356	4.5552	4.4083	4.5026	4.4745	4.2175
metab_1305	pos_1309	411.162	0.2954	0.9405	0.4927	0.5435	5.8989	3.9263	6.4184	5.0921	4.9699	3.8674	5.6192	5.3875	5.5995	5.0726	5.6863	4.7167
metab_1306	pos_1310	243.134	0.5383	1.0594	0.0417	0.0603	5.4935	5.4859	5.8665	5.54	5.6827	5.4173	5.6311	5.564	5.3228	5.1106	4.9968	4.9817
metab_1307	pos_1311	149.06	0.1083	0.9913	0.5901	0.636	5.6122	5.5359	5.3127	5.4736	5.5478	5.2009	5.3878	5.5806	5.5668	5.3238	5.6902	5.4208
metab_1308	pos_1312	214.107	0.1331	0.9857	0.6248	0.6682	5.0713	5.0831	5.3358	5.0478	5.0234	5.0201	4.9163	4.9833	4.9747	5.8302	5.14	5.1811
metab_1309	pos_1313	329.138	0.2778	0.9728	0.3097	0.3598	5.7326	5.4272	5.3385	5.6538	6.1998	5.354	5.6159	5.9264	5.811	5.6559	5.9664	5.6738
metab_1310	pos_1314	309.096	0.5799	1.1651	0.2424	0.2887	4.4041	3.4176	4.2772	5.6871	6.4467	4.763	4.2316	4.5129	2.8979	4.632	3.5108	5.1057
metab_1311	pos_1315	207.101	0.564	0.9501	0.0017	0.0037	5.2765	5.2769	5.2451	5.2101	5.3462	5.0369	5.5164	5.619	5.3207	5.4126	5.5562	5.6147
metab_1312	pos_1316	448.196	1.3118	0.7853	0.0013	0.003	6.1525	4.5537	5.3332	5.254	5.6763	4.5713	6.7696	6.9599	5.7878	6.917	6.5263	7.2056
metab_1313	pos_1317	183.091	1.3359	1.3071	0	0	5.4788	5.749	5.3282	5.7427	5.3118	5.429	4.6858	4.2029	3.9142	4.0609	4.317	4.0978
metab_1314	pos_1318	331.153	1.3498	0.7235	0.003	0.006	4.5903	4.511	4.3299	4.5936	5.2526	2.4709	6.0167	6.2785	5.1228	5.923	6.1533	6.0891
metab_1315	pos_1319	256.118	1.3667	0.7851	0.0003	0.0008	5.524	5.0312	5.2554	5.3761	5.9173	5.1433	6.9665	7.1216	5.7408	7.0944	6.7377	7.4145
metab_1316	pos_1320	542.223	0.5219	0.9346	0.1221	0.1565	5.6968	5.0399	5.1754	5.7985	6.4397	5.1255	5.8315	6.0664	5.9849	5.7247	6.1417	5.8521
metab_1317	pos_1321	174.149	0.2734	1.0352	0.4043	0.4565	5.3284	5.1244	5.2779	5.1142	4.8883	4.9432	5.7134	5.2414	4.4701	4.671	4.8058	4.7309
metab_1318	pos_1322	325.139	1.1511	1.1911	0	0.0002	6.2736	5.8625	6.6947	6.035	5.9878	6.1741	5.3667	5.394	5.0374	5.1201	5.2474	4.9179
metab_1319	pos_1323	136.076	1.0459	1.1494	0	0	6.0808	6.0892	6.1316	6.1755	6.1568	6.1951	5.5609	5.5792	5.0586	5.4377	5.1811	5.2236
metab_1320	pos_1324	267.121	0.9995	1.1607	0	0.0001	5.5148	5.5053	5.5599	5.3939	5.462	5.2885	5.0591	4.4574	4.6004	4.7849	4.5151	4.7767
metab_1322	pos_1326	354.19	0.1975	1.0239	0.5859	0.6321	6.6168	6.0721	5.8865	5.972	5.374	5.5594	5.5265	6.114	5.4594	6.3855	5.8587	5.3055
metab_1323	pos_1327	409.183	0.6965	1.0939	0.0291	0.0437	6.6876	5.947	6.7203	6.2399	6.4329	6.0052	5.8071	5.8521	5.3522	5.3347	6.3862	6.0374
metab_1324	pos_1328	310.128	0.8963	0.8863	0.0184	0.0291	6.4666	5.9047	6.1528	6.5642	7.2291	6.0831	7.6244	7.6266	6.2159	7.2873	7.0857	7.4853
metab_1325	pos_1329	439.193	0.1628	1.0203	0.692	0.7297	6.3611	5.2843	5.7978	5.5748	5.4732	5.2257	5.5074	6.0774	5.4112	5.5123	5.9571	4.5781
metab_1326	pos_1330	464.213	0.7655	0.9031	0.0164	0.0263	5.985	5.1402	5.5494	5.199	5.4988	5.3807	5.611	6.3932	5.6445	5.8376	6.5086	6.2757
metab_1327	pos_1331	227.164	0.2919	1.0396	0.4201	0.4725	6.3821	5.6021	5.9962	5.74	5.413	5.3722	5.7113	5.6104	5.3072	4.8554	6.3766	5.3292
metab_1328	pos_1332	222.076	0.7713	1.1172	0.0119	0.02	5.1912	5.2346	6.3299	5.2823	5.387	5.2834	5.003	4.8379	4.643	4.8504	5.0352	4.9022
metab_1329	pos_1333	169.049	0.9302	1.1262	0.0008	0.0019	6.2252	6.2159	6.8987	6.2269	6.1366	6.1977	5.6306	5.4836	5.4359	5.459	6.0318	5.6129
metab_1330	pos_1334	153.091	1.0079	1.159	0	0	5.3176	5.5761	5.2925	5.3677	5.3367	5.3331	4.4795	4.7249	4.5064	4.5528	4.8431	4.6943
metab_1331	pos_1335	203.179	0.9222	0.7918	0.0696	0.0947	5.624	3.1944	5.0848	4.7066	3.0834	3.6078	5.7752	4.251	6.4063	5.8364	4.9452	4.7429
metab_1332	pos_1336	441.245	0.294	0.9371	0.6195	0.663	5.5361	4.2314	4.9823	4.639	4.5849	4.3763	5.9148	2.4411	6.521	5.7586	4.8376	4.7769
metab_1333	pos_1337	774.434	1.4758	1.6559	0.0028	0.0056	6.3667	5.9036	3.2432	5.4034	3.7748	5.0746	2.9721	3.0797	2.929	2.9735	3.0458	2.973
metab_1334	pos_1338	181.086	1.3366	1.3064	0	0	5.399	5.5168	5.372	5.3084	5.1604	5.3468	4.0684	4.2342	3.8784	4.1394	4.1121	4.1437
metab_1335	pos_1339	435.198	0.4337	0.9241	0.2418	0.2881	4.8352	4.393	5.1159	4.4728	4.0752	4.2123	4.579	4.298	5.9117	5.3586	4.6385	4.5416
metab_1336	pos_1340	576.264	0.5681	1.1405	0.3116	0.3618	6.6699	4.6442	5.7146	5.8211	3.7876	3.797	3.4943	5.4378	4.3297	4.9291	4.9963	3.4952
metab_1337	pos_1341	376.175	1.2905	1.3395	0.0024	0.005	5.3033	6.2055	4.9109	5.9949	6.1043	5.1716	4.0042	5.1048	4.4928	3.4609	4.6265	3.4604
metab_1338	pos_1342	243.113	0.033	0.9955	0.9002	0.9169	5.199	4.9594	5.4895	5.2884	5.8842	4.9249	5.7891	5.3367	5.4217	4.9668	5.1234	5.2516
metab_1339	pos_1343	561.193	0.9355	0.8627	0.0027	0.0055	4.6933	4.7259	5.0855	4.7791	5.5007	4.667	5.375	6.2854	5.4642	5.4273	5.6621	5.9264
metab_1340	pos_1344	473.235	0.9777	0.8333	0.021	0.0327	6.1602	4.3662	6.4256	4.9786	5.0899	4.3009	6.1253	6.5804	6.37	6.432	6.2823	5.794
metab_1341	pos_1345	118.041	1.6974	0.6161	0	0.0002	3.8269	2.6566	3.6455	3.1895	4.6342	2.8381	5.6095	5.2746	5.7528	5.6974	5.8179	5.5893
metab_1342	pos_1346	363.059	2.005	0.5758	0	0	4.4465	3.6194	3.5291	3.6253	4.0427	3.5605	6.6035	6.3212	6.7154	6.6394	6.7121	6.6501
metab_1343	pos_1347	724.302	1.6	0.7278	0	0.0001	5.5848	4.9713	4.0516	5.1988	5.6807	4.7897	6.822	6.7086	7.1252	6.9555	7.0885	6.896
metab_1344	pos_1348	570.103	1.6907	0.6672	0	0	3.9914	4.024	3.9337	4.0299	3.9557	3.9651	5.9696	5.7225	6.1035	5.9899	6.0393	5.9928
metab_1345	pos_1349	273.11	1.0842	1.177	0	0.0001	6.0774	5.6199	5.9111	5.8914	6.0159	5.5916	4.9363	5.3024	4.7777	5.1516	4.8758	4.7795
metab_1346	pos_1350	256.118	1.2024	0.8256	0.0009	0.0022	5.913	5.0365	5.1782	5.6647	6.336	5.2233	7.0137	6.7148	6.1894	6.6477	6.5959	7.234
metab_1347	pos_1351	169.101	1.2442	1.3241	0.0013	0.003	5.6071	5.2148	5.4648	5.2577	5.3703	4.9746	4.4543	4.9072	3.337	3.074	4.2219	4.0877
metab_1348	pos_1352	224.128	0.2183	1.0345	0.542	0.5905	5.1153	4.7955	4.9305	4.9276	4.9289	4.8353	5.1161	5.4036	3.9224	4.0141	5.0386	5.0543
metab_1349	pos_1353	239.164	1.1061	1.2352	0.0008	0.002	5.0175	5.6367	5.3643	5.0754	5.2269	4.9695	3.8664	5.0182	3.8426	4.4656	4.0802	4.0586
metab_1350	pos_1354	301.118	0.6166	0.9249	0.0707	0.096	5.9139	5.3774	6.6991	6.0946	6.7573	5.5914	6.7766	6.458	6.6614	6.5441	6.252	6.7006
metab_1351	pos_1355	243.122	1.2452	1.2671	0	0	5.2476	5.5036	5.8153	5.2895	5.4726	5.3209	4.5992	4.0675	4.3892	4.0717	4.0763	4.5668
metab_1352	pos_1356	418.185	0.4681	1.0552	0.0837	0.1118	5.9448	5.6306	5.6689	5.6543	5.7475	5.3988	5.5145	5.7369	4.9471	5.107	5.2181	5.738
metab_1353	pos_1357	814.291	0.5873	0.9091	0.0963	0.127	4.7574	4.79	4.6996	4.7958	4.7216	4.7311	5.2659	5.348	4.7334	6.3283	4.5021	5.1675
metab_1354	pos_1358	561.194	0.513	0.9098	0.2531	0.3001	4.7526	4.7672	5.9338	5.8334	6.81	4.5815	5.6422	7.052	5.4437	5.4293	5.98	6.3701
metab_1355	pos_1359	374.159	1.5177	1.4659	0	0.0002	5.4156	5.9669	5.0545	5.7519	5.6639	5.2011	3.6268	3.451	4.2551	3.3384	4.5407	3.3379
metab_1356	pos_1360	285.112	1.054	1.1847	0.0001	0.0002	5.5097	5.5843	5.3607	5.5308	5.5865	5.028	4.4464	4.8099	4.5027	4.9417	4.3688	4.449
metab_1357	pos_1361	271.096	1.5053	1.3722	0.0001	0.0002	6.4635	6.3377	6.2166	6.2226	6.3269	5.9294	4.6555	5.0942	4.8313	4.6723	4.6706	3.3985
metab_1358	pos_1362	279.17	2.1642	2.0369	0	0	6.5271	6.5175	6.2814	6.7436	6.7367	6.9029	3.9877	4.0636	3.8352	2.5427	2.3983	2.6693
metab_1359	pos_1363	317.138	0.5843	0.9007	0.1442	0.1812	5.3753	4.353	3.6809	4.7933	5.4573	4.092	4.9719	5.7487	4.9818	5.1211	5.2288	4.7604
metab_1360	pos_1364	481.097	1.1534	1.3959	0.0546	0.0766	4.657	3.9001	8.0149	6.3162	5.1543	3.9836	5.1096	3.6462	3.4953	3.5399	3.6123	3.5394
metab_1362	pos_1366	420.201	0.1102	0.9748	0.7584	0.792	4.4036	4.2565	4.5687	5.1128	5.7535	3.5573	4.6542	5.0363	4.866	5.0794	5.0345	3.6952
metab_1363	pos_1367	512.249	1.1384	0.7941	0.0009	0.0021	4.0519	3.9769	3.8866	3.9827	4.9886	3.918	5.7	5.2976	4.8191	5.5607	4.9053	4.9563
metab_1364	pos_1368	197.081	0.4709	1.0435	0.0286	0.0431	6.0504	5.8722	5.7371	5.8063	5.6958	5.6323	5.4273	5.7428	5.3219	5.6421	5.7462	5.4587
metab_1365	pos_1369	274.164	1.2425	1.2771	0.0002	0.0007	5.3239	5.4859	6.3042	5.4359	5.3232	5.5604	4.362	3.8997	4.9245	4.3509	4.6311	4.0087
metab_1366	pos_1370	214.063	0.6843	1.0663	0	0	5.3872	5.4868	5.5776	5.4716	5.5508	5.5123	5.1672	5.1568	5.1665	5.0768	5.1278	5.2433
metab_1367	pos_1371	149.06	0.8311	1.1257	0.0009	0.0022	5.6908	5.1886	5.1569	5.3616	5.7821	5.1144	4.6575	4.86	4.6556	4.7771	4.7369	5.0013
metab_1368	pos_1372	569.199	1.195	1.261	0.0001	0.0004	5.117	5.1823	5.6229	5.3285	5.3817	5.2787	4.0618	4.8252	3.7386	3.85	4.4469	4.3841
metab_1369	pos_1373	331.153	1.007	0.8222	0.0084	0.0148	4.599	4.1789	4.7859	4.6782	5.5496	3.7541	5.1572	6.3531	5.3486	5.3085	5.7413	5.594
metab_1370	pos_1374	217.072	0.1704	0.9766	0.6474	0.6889	5.6222	4.5316	4.861	5.1254	5.6704	4.4408	4.771	5.3601	5.2657	5.6839	4.8696	5.0267
metab_1371	pos_1375	606.296	0.4626	0.9335	0.1199	0.154	4.7656	4.7982	4.7079	4.8041	4.7299	4.7393	4.7242	5.965	4.8789	5.3813	4.8158	4.8109
metab_1372	pos_1376	151.112	0.704	1.0805	0.0027	0.0055	6.1109	5.8387	5.8567	5.7505	5.5481	5.6693	5.1579	5.4661	5.5853	5.4958	5.3463	5.1316
metab_1373	pos_1377	243.07	1.8397	0.4165	0.0002	0.0006	3.0133	1.9818	1.8042	1.5518	1.4799	1.489	4.7505	2.9922	4.9667	5.0888	5.6153	3.772
metab_1374	pos_1378	738.317	0.6913	0.9172	0.0195	0.0306	5.6604	5.693	5.6027	5.6988	5.6247	5.6341	5.3313	6.5367	6.2134	6.2914	6.5391	6.0607
metab_1375	pos_1379	391.099	0.4683	1.087	0.204	0.2474	6.2465	4.8121	4.9191	5.8481	6.5355	5.233	5.064	4.8477	5.042	5.3342	4.8142	5.8046
metab_1376	pos_1380	411.059	0.5555	1.0642	0.0768	0.1034	6.5243	6.4775	6.1469	6.5058	6.3257	6.5904	6.3559	6.5046	5.6413	5.6268	6.4937	5.6166
metab_1377	pos_1381	165.054	0.6246	1.0708	0.0282	0.0425	6.6555	6.3103	6.2661	6.4511	6.6969	6.3926	6.2038	6.4272	5.6586	5.6828	6.4445	5.7912
metab_1378	pos_1382	447.162	0.9118	1.1869	0.0147	0.024	5.4346	5.0811	4.7956	5.5896	6.2537	5.1207	4.9268	4.8603	4.7387	3.6769	4.7564	4.232
metab_1379	pos_1383	569.149	1.8944	0.5631	0	0	3.2258	3.2585	3.1682	3.2643	3.1901	3.1996	5.5986	5.5251	5.8417	5.4577	5.8651	6.0016
metab_1380	pos_1384	360.128	0.2088	0.9505	0.6524	0.6935	3.9207	4.8136	5.606	4.6847	4.8476	4.2375	3.9519	4.4588	6.374	3.6528	6.233	4.9024
metab_1381	pos_1385	303.122	0.0316	1.0028	0.9446	0.9543	5.0738	5.2822	5.42	5.3348	5.7194	5.087	5.6104	5.3826	5.24	5.9589	4.6799	4.9556
metab_1382	pos_1386	374.227	0.8363	1.1041	0.0004	0.0012	5.986	5.9047	6.399	5.8545	6.0403	5.7729	5.2487	5.4246	5.5242	5.2379	5.6103	5.5243
metab_1383	pos_1387	545.199	0.9962	0.8516	0.0083	0.0146	6.2565	5.1692	4.5458	5.6775	5.6953	4.6194	6.1128	6.1707	6.412	6.0418	6.4506	6.3397
metab_1384	pos_1388	435.198	0.3345	0.9427	0.4432	0.4956	5.4562	4.7295	5.8286	4.9104	5.3572	4.6191	5.7717	4.5416	6.5635	6.1641	4.5891	5.1509
metab_1385	pos_1389	318.181	1.5014	1.34	0	0	6.3006	6.3929	6.0585	6.4705	6.4173	6.6193	4.4457	4.871	5.2066	4.7338	4.8378	4.4595
metab_1386	pos_1390	412.217	0.6654	0.9093	0.0776	0.1044	6.6424	5.3142	6.4694	5.9551	6.0452	5.4677	6.1558	6.7471	6.8017	7.3665	6.5316	5.8738
metab_1387	pos_1391	257.092	0.2599	1.0348	0.4379	0.4903	4.862	5.6982	4.9799	5.5701	5.1788	5.6917	5.6778	5.1652	5.3243	4.9672	4.4994	5.2738
metab_1388	pos_1392	374.218	1.3909	1.2892	0	0	6.1346	6.0632	6.769	6.0431	6.2137	5.9611	4.6916	5.1984	4.7496	4.6216	4.8296	4.749
metab_1389	pos_1393	366.191	0.5159	1.0797	0.1932	0.2355	7.1501	6.4347	6.0634	6.4885	6.3398	6.2072	5.774	5.7682	5.3122	6.0796	7.3959	5.4976
metab_1390	pos_1394	188.07	1.1581	1.2286	0	0	5.4531	5.1054	5.0915	5.2098	5.0242	5.2308	4.2954	4.244	4.0774	4.1174	4.2979	4.2953
metab_1391	pos_1395	218.117	0.4617	1.0821	0.2598	0.3075	5.802	5.9057	4.2921	6.1008	6.0371	5.546	5.427	5.6574	4.5844	4.7672	5.9174	4.7766
metab_1392	pos_1396	249.112	0.9883	1.1919	0.0025	0.0051	5.6956	5.1343	5.6904	5.0963	5.0536	4.8165	3.976	4.8084	4.1926	4.5423	4.8115	4.0891
metab_1393	pos_1397	475.157	1.5324	1.5082	0.0023	0.0047	6.9055	5.7569	5.9943	6.1762	5.2123	5.4087	3.82	5.3252	3.8039	4.8158	3.2988	2.4419
metab_1394	pos_1398	241.071	0.9787	0.8575	0.0001	0.0002	4.4451	4.3656	4.4641	4.4626	4.4609	4.6225	5.0378	5.607	4.9485	5.4106	5.2405	5.0316
metab_1395	pos_1399	253.599	1.5397	0.7327	0	0	4.7337	4.6104	4.3602	4.5813	4.707	4.7098	6.2127	6.6902	6.006	6.476	6.2999	6.12
metab_1396	pos_1400	404.155	0.2866	1.038	0.4135	0.4656	6.0136	5.3243	5.5534	5.4227	5.258	5.2319	5.1837	5.5235	5.8201	4.546	5.666	4.8652
metab_1397	pos_1401	347.101	0.8022	1.1655	0.0457	0.0654	5.553	4.6993	6.0277	5.1786	5.4789	4.6213	4.1977	5.1145	3.5762	5.1215	4.6945	4.3766
metab_1398	pos_1402	240.138	0.0487	1.005	0.853	0.876	5.3689	5.1527	5.1026	5.1948	4.8094	5.4817	4.786	5.2464	5.2129	5.329	5.4223	4.9577
metab_1399	pos_1403	161.096	0.505	1.056	0.0323	0.0479	5.1995	5.196	5.5436	5.0672	4.9246	4.9415	4.7669	4.8763	4.731	4.9418	5.1204	4.7939
metab_1400	pos_1404	617.278	0.8667	0.8768	0.004	0.0078	5.0269	5.121	5.3908	5.0709	4.7402	5.1311	5.8855	5.9115	5.5655	6.3295	5.9821	5.0912
metab_1402	pos_1406	315.133	0.0965	1.0125	0.8084	0.8369	4.9631	5.0561	5.7668	4.9511	5.667	4.2883	5.5694	4.951	5.1899	4.6518	4.8621	5.0863
metab_1403	pos_1407	147.044	1.0108	1.1459	0.0007	0.0018	6.9034	6.4186	6.4681	6.821	7.4513	6.4105	5.9252	5.9983	6.095	5.8685	5.6154	5.8107
metab_1404	pos_1408	369.029	0.4558	0.9199	0.295	0.3444	5.2707	3.473	5.435	5.3006	5.9708	4.506	4.905	5.8713	5.1501	5.869	5.5129	5.2577
metab_1405	pos_1409	309.096	1.1118	1.2298	0.0076	0.0135	6.8309	5.6606	5.7232	6.7094	7.4336	6.2393	5.5725	5.3804	5.8135	5.4502	4.2988	4.8733
metab_1406	pos_1410	536.197	0.3818	0.9191	0.4169	0.469	4.9657	4.1531	5.4594	4.1888	5.0817	3.7632	3.9578	4.6828	6.1111	4.7398	6.2835	4.2651
metab_1407	pos_1411	259.154	1.5298	1.4763	0	0	5.0356	5.367	5.4593	5.0656	4.9071	4.9654	3.3773	3.4196	3.2687	3.717	3.7659	3.3128
metab_1408	pos_1412	448.254	1.1255	1.331	0.0099	0.0169	5.6805	4.3315	5.9269	4.7269	4.9345	3.693	3.3904	4.0834	3.3472	4.3301	3.4641	3.3912
metab_1409	pos_1413	131.049	0.1886	0.9816	0.4678	0.5195	5.7451	5.7055	5.5921	5.7444	6.1554	5.3222	5.727	6.1253	5.6448	5.5497	5.9951	5.8652
metab_1410	pos_1414	511.169	1.2509	0.768	0.0039	0.0075	5.4903	4.6021	5.8614	3.9911	4.7133	3.9263	5.5933	6.8102	5.7056	6.7778	6.3554	5.9745
metab_1411	pos_1415	619.293	1.2681	0.8152	0.0001	0.0004	6.0915	5.1195	5.7337	5.5042	5.0643	5.8827	6.8064	6.8698	6.8458	7.1478	7.0052	6.2953
metab_1412	pos_1416	875.408	0.5802	0.8388	0.2705	0.3186	4.7734	3.7589	4.8293	3.8186	3.2997	3.2161	3.7039	6.302	4.0867	6.4597	4.7817	2.9145
metab_1413	pos_1417	247.132	0.046	1.0072	0.9135	0.9277	5.2291	5.3108	5.3013	5.1039	5.14	4.9734	5.3005	4.4088	5.6646	6.4032	4.7064	4.3526
metab_1414	pos_1418	203.081	1.3246	1.3472	0	0.0001	4.8573	5.1197	4.7568	5.2556	5.6171	5.3745	3.9484	3.8917	4.1596	3.2816	4.048	3.6671
metab_1415	pos_1419	475.157	0.9693	1.1532	0.0013	0.003	5.991	5.6508	6.2405	5.9711	5.4195	6.2709	4.7685	5.4131	4.9592	5.3792	5.3753	4.9284
metab_1416	pos_1420	254.07	1.6498	1.5026	0	0	5.5613	6.2086	5.6412	5.966	5.6943	6.0177	4.2947	3.8107	3.9731	3.3287	3.8174	4.1302
metab_1417	pos_1421	109.101	0.809	1.0841	0	0	6.036	6.0667	6.1037	5.9737	5.9152	5.8881	5.4619	5.6031	5.5039	5.5523	5.5839	5.4841
metab_1418	pos_1422	194.115	0.5821	1.0651	0.0104	0.0177	5.1925	5.5434	5.2887	5.4298	5.3124	5.4335	4.967	5.3129	4.9062	4.7385	5.0288	5.2801
metab_1419	pos_1423	285.112	0.4432	0.9554	0.0496	0.0702	5.2784	5.3006	5.2457	5.2208	5.4279	4.7758	5.3296	5.5528	5.5168	5.2496	5.6306	5.4238
metab_1420	pos_1424	151.075	0.489	1.0461	0.0153	0.0248	5.5581	5.5903	5.377	5.5176	5.398	5.3411	5.0025	5.3883	5.2218	5.0434	5.4234	5.2571
metab_1421	pos_1425	219.101	1.0726	0.8709	0.0001	0.0004	6.355	5.8635	5.5205	5.9002	6.1875	5.6018	6.7148	6.6783	6.847	6.6038	6.9377	6.8973
metab_1422	pos_1426	550.212	1.1681	0.7985	0.0011	0.0026	4.8935	4.3892	3.9042	4.6148	5.2563	3.9356	5.3384	5.9949	5.4111	5.3375	5.9386	5.7807
metab_1423	pos_1427	359.167	0.6868	1.1098	0.0534	0.0751	6.4567	5.1261	6.479	5.7229	5.5925	5.246	4.7727	5.3262	5.0409	5.2859	5.5327	5.2396
metab_1424	pos_1428	340.202	0.0125	0.9967	0.9342	0.9453	6.3951	5.9037	5.7609	5.7197	5.461	5.1741	5.5911	6.1122	5.8046	6.2148	5.6114	5.1959
metab_1425	pos_1429	177.054	0.4959	1.055	0.0658	0.0902	6.4926	5.9704	5.9358	6.2253	6.6256	5.9362	6.1198	6.0225	5.9545	5.8106	5.4515	5.8922
metab_1426	pos_1430	465.102	1.2562	1.3211	0.0062	0.0113	5.5001	5.4295	7.4101	5.8617	5.4006	5.7509	4.9284	5.1478	3.3588	4.0377	4.4447	4.8419
metab_1427	pos_1431	581.199	0.2899	0.9439	0.516	0.5658	4.6063	4.9506	3.2286	4.9216	5.6181	3.9378	4.628	5.4047	4.7016	4.1296	5.4252	4.5979
metab_1428	pos_1432	397.164	0.8674	0.887	0.0102	0.0175	6.0802	6.0864	5.0978	5.8016	6.2528	5.0997	6.3173	6.7233	6.6688	6.0886	6.5695	6.4365
metab_1429	pos_1433	446.202	0.8051	0.8613	0.0462	0.066	6.0761	4.3066	4.1806	5.1472	4.5013	4.212	5.4351	5.6366	5.3764	5.6739	5.9445	4.9344
metab_1430	pos_1434	674.28	0.2798	0.9554	0.4456	0.4977	5.3484	5.0345	4.8086	4.9271	4.5884	4.8417	5.0213	5.9038	4.2518	5.9451	4.7316	5.0782
metab_1431	pos_1435	255.086	0.3064	1.0323	0.2386	0.2845	5.0859	5.7831	5.4902	5.6459	5.7718	5.7343	5.6061	5.0826	5.6745	5.3675	5.4072	5.3249
metab_1432	pos_1436	142.078	0.0283	1.0016	0.9828	0.9859	5.3742	3.9419	4.8644	4.5982	3.751	3.4025	3.9011	4.5569	4.5608	4.4994	4.593	3.7759
metab_1433	pos_1437	575.209	0.9393	0.8639	0.0104	0.0178	5.9651	4.6255	4.5351	5.1606	5.724	5.1692	5.8083	5.9462	5.6936	6.4094	6.3129	5.9248
metab_1434	pos_1438	180.102	0.2258	0.9851	0.2398	0.2858	6.1121	5.9566	6.1116	6.0847	6.1995	5.9704	6.1067	6.1574	5.9726	6.0928	6.424	6.2294
metab_1435	pos_1439	301.07	0.9142	1.2004	0.0277	0.0419	5.4855	5.2688	5.0181	5.3832	6.0254	5.6357	3.6393	5.2304	4.6581	5.5796	4.5867	3.6402
metab_1436	pos_1440	625.176	1.4847	1.4298	0.0048	0.0091	6.1487	6.4784	6.2598	6.5711	7.2471	6.8167	4.8958	4.9292	5.6965	5.7602	4.0396	2.3195
metab_1437	pos_1441	290.102	0.3479	1.0556	0.3652	0.4164	5.4276	4.4521	6.0555	4.8999	5.1462	4.3113	4.5158	5.0451	4.7961	4.7222	5.0564	4.5623
metab_1438	pos_1442	193.049	0.7828	1.0923	0	0.0001	5.7069	5.5303	5.3402	5.5725	5.6751	5.4839	4.9687	5.121	5.0404	5.0929	5.146	5.1231
metab_1439	pos_1443	336.191	1.7295	1.635	0	0	5.3476	5.2745	5.4257	5.282	5.4102	5.407	3.187	3.3294	3.5071	3.1884	3.2607	3.1878
metab_1440	pos_1444	327.159	0.5752	0.9304	0.0633	0.0871	5.8913	5.4088	4.7045	5.3536	5.0055	5.3237	5.5159	5.6539	5.8623	5.3018	5.8642	5.8603
metab_1441	pos_1445	399.141	0.1748	1.0205	0.6418	0.6839	6.7476	7.1617	6.6381	7.3033	7.7092	6.9147	6.9516	7.6102	6.6656	5.9368	6.9647	7.4946
metab_1442	pos_1446	519.211	0.0395	1.0023	0.9258	0.9384	5.9447	5.624	5.8359	5.5845	5.6686	5.302	5.6036	5.8053	5.9987	5.4322	5.7598	5.2796
metab_1443	pos_1447	241.07	0.3038	0.9347	0.4544	0.5065	4.9327	4.2606	4.0615	4.4248	4.0531	4.2699	4.5652	5.0853	5.0404	5.7224	4.3145	3.095
metab_1444	pos_1448	379.138	1.3973	1.3682	0.0005	0.0014	5.6396	5.7734	6.5476	6.019	5.7341	6.4053	4.6468	3.0551	4.9751	4.2953	4.829	4.5984
metab_1445	pos_1449	155.07	1.0984	1.1767	0	0	5.7908	5.7308	6.2115	5.7457	5.6113	5.7582	4.8658	5.0535	4.8919	4.7964	5.0195	4.9916
metab_1446	pos_1450	321.108	0.1804	0.978	0.5844	0.6308	5.0852	4.8957	4.7869	5.2383	5.8288	4.9002	5.4105	4.9901	5.7807	4.8752	5.2385	5.1337
metab_1448	pos_1452	327.122	0.4526	1.0545	0.1438	0.1808	6.1724	6.1926	5.8151	6.1951	6.6438	5.7634	5.654	6.2931	5.7277	5.2176	6.0558	5.9323
metab_1449	pos_1453	317.138	0.2834	0.9663	0.3485	0.3995	5.712	5.4614	5.4447	5.5737	6.1556	5.0445	5.7793	6.2355	5.6103	5.3202	5.9691	5.6413
metab_1450	pos_1454	394.185	1.0329	1.2133	0.0072	0.0128	5.5749	5.6148	5.7499	5.7389	5.9657	5.7889	3.9317	5.6811	4.5132	3.9331	5.1001	5.2209
metab_1451	pos_1455	161.06	0.4263	0.9555	0.1636	0.203	6.1916	6.0794	5.7931	6.0289	6.3495	5.7627	6.6002	6.3375	5.9356	6.8757	5.8169	6.3243
metab_1452	pos_1456	564.301	0.4694	0.9285	0.1766	0.2175	5.7287	4.6956	5.6211	4.7015	4.6273	4.6367	5.5445	5.6247	5.0279	5.6703	5.6724	4.7829
metab_1453	pos_1457	217.097	1.3503	1.4647	0.0016	0.0035	4.2429	5.1366	3.9048	5.6239	5.0656	6.2993	3.285	3.3951	3.3862	3.2864	3.3587	3.9584
metab_1454	pos_1458	327.159	0.8468	0.8859	0.0159	0.0256	6.3973	5.3747	5.2479	5.6429	5.9466	4.7817	6.1378	6.4975	6.1697	5.9698	6.4442	6.4758
metab_1455	pos_1459	219.101	0.1684	1.0157	0.5032	0.5534	6.7889	6.3855	6.1378	6.3788	6.6353	6.0619	6.068	6.5895	6.3509	6.0359	6.3898	6.3592
metab_1456	pos_1460	515.191	1.7039	1.6454	0.0037	0.0072	6.544	6.8576	6.4341	6.7421	6.5993	6.3599	4.8611	4.2479	5.5389	0.8134	4.7679	3.799
metab_1457	pos_1461	391.138	1.2334	1.2367	0	0.0001	5.8809	6.0785	5.6838	6.0433	5.9686	5.7669	5.0549	4.799	5.0048	4.1963	4.7347	4.8529
metab_1458	pos_1462	578.211	1.7665	0.6655	0	0	4.4728	4.5054	4.4151	4.5113	4.4371	4.4465	5.9921	7.1535	6.5546	6.9315	7.0941	6.5281
metab_1459	pos_1463	155.085	1.1794	0.8328	0.0002	0.0006	6.1186	5.3009	5.8359	5.537	5.3388	5.0607	6.2094	6.9273	6.5362	6.7653	6.9	6.5225
metab_1460	pos_1464	201.127	0.7497	0.8978	0.0186	0.0294	5.8487	5.2205	5.7622	5.3216	5.3408	5.0191	5.5819	6.7335	6.1677	6.1187	6.039	5.5725
metab_1461	pos_1465	643.19	1.9607	0.5908	0	0	3.8585	3.8911	4.0133	3.897	3.8228	3.8322	6.1851	6.7791	6.4859	6.6627	6.7458	6.6013
metab_1462	pos_1466	645.202	1.7176	0.6129	0	0	3.3683	3.2836	3.4794	3.2894	3.4216	3.2778	4.7846	5.974	5.5121	5.5105	5.6374	5.4088
metab_1463	pos_1467	576.264	1.5716	0.7552	0	0.0001	6.3578	5.3492	6.3726	5.3997	5.6217	5.2363	7.1521	7.8494	7.4558	7.7012	7.8476	7.4619
metab_1464	pos_1468	430.134	0.3213	0.9571	0.4556	0.5076	6.4364	5.485	5.0693	6.1901	6.6991	6.2929	7.036	6.3693	5.7384	5.8986	6.9524	5.7981
metab_1465	pos_1469	233.117	1.3186	1.2769	0.0001	0.0004	6.8134	5.9746	6.3318	6.1967	5.9642	5.7623	4.3473	5.395	4.7639	4.7774	5.1337	4.5948
metab_1466	pos_1470	295.151	1.3746	1.4135	0.0022	0.0047	5.7557	5.4754	6.2535	5.4873	5.5424	5.2241	5.41	3.801	3.0205	4.7202	3.1654	3.7488
metab_1467	pos_1471	352.142	1.209	1.3465	0.0044	0.0084	5.3395	4.8038	5.5922	4.9428	5.469	3.9549	3.3338	4.7955	3.8757	3.2006	3.9529	3.2001
metab_1468	pos_1472	547.215	0.4301	0.9391	0.2126	0.2568	5.066	5.3592	4.1414	5.3592	5.184	4.4122	5.3495	5.3438	4.9535	4.8801	5.2913	5.6164
metab_1469	pos_1473	317.065	0.8673	1.2385	0.0677	0.0925	5.728	4.6873	4.9832	5.0945	4.7035	4.3124	6.0623	3.6209	3.5254	3.5146	3.587	3.5141
metab_1470	pos_1474	242.154	0.186	0.9732	0.5967	0.6422	5.7937	5.4358	5.4056	5.4118	5.2125	5.6593	6.3719	5.4646	5.4311	5.1489	6.4738	4.9295
metab_1471	pos_1475	312.123	0.8747	1.2045	0.024	0.0368	4.1139	4.7479	4.408	4.8584	4.8307	5.7358	3.9546	4.8966	3.5321	3.503	3.8503	4.0841
metab_1472	pos_1476	543.183	0.164	0.9789	0.6748	0.7143	6.7137	5.828	5.2895	6.1484	6.3321	5.5661	5.7132	6.7707	6.3789	5.3365	6.3071	6.1446
metab_1473	pos_1477	391.138	1.4775	1.3478	0	0	5.9538	6.2925	5.6922	6.2602	6.0273	5.9931	4.8552	4.3635	4.596	4.3326	4.4847	4.2418
metab_1474	pos_1478	331.153	0.1199	0.9863	0.7257	0.7617	6.4007	6.0355	5.8122	6.3906	6.9017	5.6281	6.1107	6.9123	5.8943	6.084	6.3598	6.3225
metab_1475	pos_1479	540.244	0.0467	0.9948	0.8897	0.9075	6.6606	5.9767	6.1031	6.3816	6.9506	5.8674	6.1819	7.0299	6.0614	6.0614	6.491	6.3094
metab_1476	pos_1480	561.173	0.2806	0.9569	0.4757	0.5272	5.667	4.7398	4.7581	5.4918	6.1505	4.5262	5.2971	6.2247	5.1043	5.0535	5.6658	5.3974
metab_1477	pos_1481	389.12	1.5385	1.3854	0	0.0001	6.0845	6.2754	6.8478	6.2402	6.1249	6.2577	4.3679	4.6069	4.101	4.1003	5.1137	5.0167
metab_1478	pos_1482	167.107	1.2408	1.231	0	0	5.7292	5.9197	5.7187	5.7799	5.5482	5.6792	4.666	4.6778	4.6176	4.7507	4.5968	4.6137
metab_1479	pos_1483	203.07	0.2429	0.9692	0.4266	0.4792	5.1219	5.2687	4.8989	5.1351	5.2915	4.6664	4.6109	5.3451	5.1418	5.2231	5.8896	5.1391
metab_1480	pos_1484	207.065	1.0578	1.1592	0	0	6.397	6.0446	5.7666	6.0886	5.9878	6.2408	5.2184	5.327	5.2099	5.2188	5.2118	5.3259
metab_1481	pos_1485	405.117	0.4921	1.1017	0.2113	0.2554	4.8161	4.3107	4.2443	5.5556	5.7767	4.4689	3.6762	4.7242	3.9405	4.6592	4.9509	4.5289
metab_1482	pos_1486	442.196	1.6378	1.5739	0	0	5.7944	5.3083	5.4627	5.2017	5.3454	4.6291	3.2598	3.3626	3.7037	3.2563	3.3286	3.2558
metab_1485	pos_1489	163.112	0.7805	1.09	0.0001	0.0004	5.7178	5.8497	5.8567	5.6998	5.5815	5.6629	5.3769	5.151	5.1592	5.5295	5.1457	5.1673
metab_1486	pos_1490	297.112	1.087	1.1951	0.0008	0.0021	5.9613	6.0714	5.8113	6.0046	6.232	5.6052	4.9399	5.656	4.8513	4.2517	5.1869	4.9737
metab_1487	pos_1491	451.174	1.75	1.5405	0	0	6.2927	6.3187	6.2112	6.1872	6.3396	5.8292	3.6901	4.563	4.4887	3.6915	4.0084	3.691
metab_1488	pos_1492	481.185	1.869	1.8056	0.0014	0.0031	6.6226	6.6946	6.515	6.5476	6.6582	6.1921	2.1661	4.6011	5.5495	2.1675	5.0744	2.167
metab_1489	pos_1493	358.147	0.8757	1.1658	0.029	0.0436	5.5794	5.3895	6.109	5.6346	6.0072	5.1116	4.1347	5.7739	5.1076	4.3295	5.3719	4.3057
metab_1490	pos_1494	349.116	0.4788	0.9493	0.103	0.1348	6.2181	5.8188	5.5367	6.0068	6.3066	5.8093	6.1537	6.6916	5.9268	6.6321	6.2151	5.98
metab_1492	pos_1496	513.234	2.3372	4.5171	0	0	5.8761	5.4491	5.8242	5.0635	4.1145	4.545	0.8194	0.9124	0.783	0.8206	0.8828	2.6164
metab_1493	pos_1497	527.246	0.1883	0.9489	0.722	0.758	5.9707	3.3586	4.4855	4.714	4.7002	2.8147	5.4884	4.8427	4.1612	3.1932	6.0858	3.6793
metab_1495	pos_1499	352.211	0.7029	0.9325	0.037	0.0541	7.7906	7.5195	7.6098	7.408	7.4485	7.4121	8.6157	7.5198	7.8161	8.7456	7.5372	8.2203
metab_1496	pos_1500	397.221	0.4119	1.0491	0.1366	0.1729	5.7979	5.1891	5.5241	5.2799	5.1444	4.9872	4.8479	5.1666	5.205	5.3844	5.0772	4.7471
metab_1497	pos_1501	397.15	0.598	1.0926	0.0593	0.0823	5.9366	5.0447	5.0724	5.6439	5.5102	4.7182	4.4434	4.9162	4.9638	5.0315	5.1546	4.7129
metab_1498	pos_1502	220.133	0.5468	0.9012	0.178	0.2191	4.0995	4.3792	4.3999	4.3377	4.2497	4.2696	5.5075	3.5965	4.5387	5.6568	4.2432	5.0129
metab_1499	pos_1503	545.259	0.0594	0.994	0.7087	0.745	5.0778	5.0653	5.042	4.9248	4.6262	4.8959	4.9813	5.1248	4.8892	5.0224	4.9027	4.8947
metab_1500	pos_1504	392.169	1.1648	1.2065	0	0	6.0769	5.764	5.5521	5.7398	5.675	5.612	4.7456	4.9302	4.7334	4.5975	4.8454	4.6805
metab_1501	pos_1505	341.156	1.7293	1.5128	0	0	5.9312	6.5495	6.9414	6.2125	6.4118	6.2018	3.8026	4.9659	3.9	4.2247	4.6393	3.7493
metab_1502	pos_1506	215.143	0.3518	1.0351	0.1396	0.1761	5.5617	5.2643	5.5599	5.2315	5.2774	5.1721	5.0522	5.1162	5.4992	5.3274	5.1004	4.8797
metab_1503	pos_1507	361.127	1.5604	1.4225	0	0	5.5171	5.6498	5.8717	6.0669	6.1625	6.1025	4.0964	3.942	3.9371	4.3065	4.1693	4.4131
metab_1504	pos_1508	326.232	0.8992	1.1339	0	0.0002	5.1128	5.5579	4.9865	5.2439	5.0912	5.4088	4.5929	4.7006	4.5497	4.5943	4.6666	4.5938
metab_1505	pos_1509	443.131	1.5911	1.5669	0.0002	0.0007	3.8082	5.545	5.77	5.8692	5.5643	6.3784	3.4793	3.587	3.4361	3.4807	3.553	3.4801
metab_1506	pos_1510	473.141	1.4895	1.4589	0.0007	0.0018	4.2691	5.4193	6.3432	6.0992	5.4053	6.7592	3.7834	3.8911	4.4093	3.7848	3.8571	3.7843
metab_1507	pos_1511	371.131	0.9852	1.2233	0.0099	0.017	5.3533	4.3805	6.2576	4.9574	5.4921	4.5844	4.1702	4.2451	4.3333	3.7923	4.2599	4.5627
metab_1508	pos_1512	163.133	0.5281	1.0433	0.003	0.006	5.8877	6.1457	5.9453	6.1259	5.9709	6.2365	5.8118	5.7576	5.823	5.6985	5.7794	5.9357
metab_1509	pos_1513	357.132	0.9134	1.1127	0.0011	0.0025	6.7587	7.022	6.7303	6.9835	7.1656	6.6155	6.1467	6.1478	6.5201	5.7099	6.5337	6.0315
metab_1510	pos_1514	318.169	1.7026	1.6014	0	0	5.0729	5.5924	6.0336	5.2278	5.4666	5.343	3.3004	3.9102	3.2572	3.3018	3.3741	3.3013
metab_1511	pos_1515	355.172	1.3015	1.4263	0.0014	0.0031	4.2238	4.1569	6.24	4.6161	4.6246	4.2995	3.2512	3.3588	3.3056	3.2526	3.3249	3.252
metab_1512	pos_1516	429.151	0.4613	1.0464	0.0979	0.1288	6.1692	6.5948	6.6729	6.7707	7.1429	6.3317	6.2653	6.4	6.3121	6.0681	6.2366	6.6446
metab_1513	pos_1517	351.215	0.9074	1.1205	0.0001	0.0003	5.623	5.9698	5.7275	5.8424	5.5052	5.5782	5.1061	5.28	5.2342	5.0851	5.0222	4.8386
metab_1514	pos_1518	872.317	1.1873	0.7673	0.0064	0.0116	4.3934	4.426	4.3356	4.4318	4.3576	4.3671	6.5304	4.4218	6.836	6.1087	5.5183	4.8745
metab_1516	pos_1520	197.117	1.6974	1.4273	0	0	7.1354	6.7209	6.9638	6.7613	6.779	6.4451	4.7201	4.9775	4.718	4.3757	4.9758	4.8234
metab_1518	pos_1522	423.128	1.5791	1.5019	0.0002	0.0006	5.0287	5.5467	6.3349	6.0962	5.468	6.7128	2.849	4.1279	3.8489	3.9718	4.4244	4.2095
metab_1520	pos_1524	415.099	1.1028	1.1884	0.0001	0.0005	5.2748	5.9013	6.1519	6.0528	5.6896	6.3605	4.9458	5.0535	4.9026	4.9471	5.0195	4.9466
metab_1521	pos_1525	355.172	0.7535	1.1515	0.051	0.072	4.5772	4.6515	6.3289	4.6529	4.591	4.5244	4.2217	4.3294	4.1785	4.2231	4.2955	4.2226
metab_1522	pos_1526	201.119	1.4684	0.7065	0	0	3.978	3.6521	3.3441	3.4403	3.7729	3.9217	4.8899	5.2827	5.161	5.2318	5.5584	5.1737
metab_1523	pos_1527	140.002	0.8873	0.8722	0	0.0001	4.2235	3.9434	3.8861	4.0488	3.8613	3.8646	4.403	4.5565	4.4874	4.518	4.6877	4.6657
metab_1525	pos_1529	481.137	1.0974	0.8641	0.0001	0.0004	6.0915	5.7469	5.1653	5.7979	5.8991	6.1024	6.569	6.8336	6.6202	6.6514	6.8047	6.8007
metab_1526	pos_1530	842.307	1.2345	0.7775	0.0053	0.0099	4.8046	4.5068	4.4164	4.5126	5.7888	4.4478	6.641	4.8149	6.7904	6.5722	5.5253	6.2786
metab_1528	pos_1532	343.172	1.8781	1.93	0.0001	0.0004	6.153	5.3282	6.0222	5.6222	5.2433	5.0418	2.5169	4.244	4.0286	2.2957	2.1493	2.0769
metab_1529	pos_1533	341.243	0.1158	1.012	0.5894	0.6354	4.7728	4.9486	4.6983	4.8907	4.6069	4.9541	5.0147	4.5524	4.8531	4.7365	4.484	4.8897
metab_1530	pos_1534	616.244	1.9092	0.5921	0	0	4.862	3.9191	3.9591	3.9476	3.9184	2.9763	6.035	7.0761	6.5915	7.3872	6.4094	6.3255
metab_1531	pos_1535	217.086	1.4548	1.388	0	0.0002	5.7681	5.7611	5.4502	5.6891	5.8075	5.3531	4.1198	4.5889	4.4291	3.9533	4.1723	3.108
metab_1532	pos_1536	319.086	1.1787	0.7665	0.0045	0.0086	4.5923	4.3072	3.3911	4.6748	4.749	3.4225	4.7698	6.0113	5.4041	6.3185	5.0822	5.2038
metab_1533	pos_1537	218.211	0.8877	1.1215	0.0001	0.0003	5.4823	5.7502	5.5586	5.6669	5.8522	5.7474	4.9172	4.9844	5.0046	5.4438	5.0123	5.003
metab_1534	pos_1538	229.143	1.0486	1.1558	0	0	5.7452	6.0221	6.1127	5.7257	5.7607	5.7159	5.0018	5.1857	5.0309	4.9589	5.1483	5.0308
metab_1535	pos_1539	179.07	1.0878	1.1376	0	0	6.9544	7.1548	6.9758	7.0801	7.0375	6.816	6.1273	6.3675	6.188	5.8844	6.2775	6.0922
metab_1536	pos_1540	267.12	1.1188	1.165	0	0	6.385	6.3696	6.4471	6.3496	6.172	6.3509	5.6221	5.5785	5.236	5.1926	5.5395	5.5109
metab_1537	pos_1541	133.101	0.5551	1.0581	0.0189	0.0297	5.8848	5.6388	6.012	5.6737	5.5006	5.4923	5.4053	5.555	5.062	5.5316	5.3481	5.4193
metab_1539	pos_1543	99.0444	0.4018	0.9618	0.0932	0.1234	5.7522	5.4497	5.2649	5.4907	5.4592	5.5503	5.806	5.9253	5.4607	5.4475	6.016	5.6192
metab_1540	pos_1544	221.58	0.5021	0.9327	0.0953	0.1257	4.7041	4.8144	4.7213	4.7568	4.8651	4.8211	4.8676	5.7328	4.5288	4.9549	5.0846	5.5836
metab_1541	pos_1545	369.169	0.7976	0.8882	0.0123	0.0206	5.1619	5.4975	4.647	5.2121	5.5468	4.4806	5.5073	6.2326	5.5545	5.5611	5.8048	5.7345
metab_1542	pos_1546	249.112	0.8722	1.1336	0.0034	0.0067	6.1682	5.4695	5.9102	5.6943	5.8922	5.37	5.0188	5.4794	4.6615	5.2642	5.2474	4.7685
metab_1543	pos_1547	367.153	0.6539	1.0847	0.0445	0.0638	5.6676	6.0208	6.3921	6.0263	6.5623	5.5141	5.4507	6.0581	5.7182	5.2577	5.5808	5.2931
metab_1544	pos_1548	521.2	0.095	1.0114	0.8004	0.8299	5.9991	5.2355	5.4842	5.6428	6.0254	5.0871	5.2279	5.8096	6.1318	5.6452	5.4224	4.8607
metab_1545	pos_1549	392.191	0.634	0.9102	0.0501	0.0708	5.3377	4.9169	4.5605	4.8653	4.8058	4.7487	6.0181	5.113	5.1609	5.6947	5.4225	4.7147
metab_1546	pos_1550	775.293	0.1738	0.978	0.6549	0.6956	5.9844	6.2362	4.7032	6.332	6.6419	5.8762	6.1062	6.3899	6.2693	5.9061	6.1559	5.751
metab_1547	pos_1551	391.138	1.2387	1.2856	0.0006	0.0016	5.2291	5.2868	5.2276	6.0394	6.1452	5.9098	4.7558	4.7385	4.1553	3.8366	4.8559	3.9778
metab_1548	pos_1552	431.167	1.0329	1.1828	0.0013	0.003	5.9287	5.9056	6.4191	5.6279	5.4065	5.1093	4.5876	4.9948	4.84	4.6882	5.0569	4.9155
metab_1549	pos_1553	577.204	0.1431	1.0178	0.7259	0.7618	4.7337	5.8674	5.2771	5.8305	6.1609	5.4181	5.4883	5.9964	5.5331	4.7078	5.4931	5.4867
metab_1550	pos_1554	371.207	1.0272	1.2502	0.0146	0.0238	4.1892	5.5037	4.7552	5.491	5.5534	4.8822	3.7475	5.1616	4.4824	3.6099	3.6823	3.6094
metab_1551	pos_1555	209.153	1.1385	1.2064	0.0001	0.0004	5.7467	6.0452	5.6513	5.866	5.627	6.064	4.6263	4.8944	5.5063	4.6226	4.7507	4.6096
metab_1552	pos_1556	550.322	1.7532	0.5522	0.0004	0.0011	4.9874	2.2851	3.8	2.2075	2.8635	2.1432	5.5402	5.3522	5.9276	5.7327	5.1991	5.3666
metab_1553	pos_1557	603.207	1.6303	2.4339	0.0112	0.019	1.4906	3.0185	6.1048	5.1365	4.1653	6.0324	1.1772	1.2785	2.9085	2.8726	1.2464	1.178
metab_1554	pos_1558	523.144	1.7591	2.9414	0.0078	0.0138	4.4495	4.1883	7.4543	5.2601	2.6795	1.5747	1.2835	1.3862	1.2427	1.2848	2.2232	1.2843
metab_1555	pos_1559	281.138	1.0742	1.1974	0.0003	0.0009	5.7156	5.6079	5.7033	5.4266	5.331	5.413	4.2126	5.2849	4.3029	4.7359	4.6421	4.5481
metab_1556	pos_1560	485.238	0.7185	0.8535	0.1074	0.1398	5.5291	4.3465	5.5213	3.8728	3.7986	3.808	5.4348	5.0064	6.1817	5.592	5.0459	4.2243
metab_1557	pos_1561	441.246	0.4125	1.0352	0.0811	0.1087	7.0181	6.4231	6.7906	6.7515	7.079	6.5268	6.4591	6.6131	6.6487	6.6807	6.4418	6.3695
metab_1558	pos_1562	266.56	0.0702	0.9926	0.8081	0.8368	5.7047	5.5663	5.0034	5.4746	5.5893	5.499	5.5677	5.6853	5.3415	5.4393	6.003	5.0482
metab_1560	pos_1564	553.262	1.5558	0.7031	0.0004	0.001	5.7158	5.1129	5.4815	3.8755	3.8837	3.8316	6.6887	6.3795	6.8561	6.8645	6.3594	6.5361
metab_1561	pos_1565	646.27	0.8312	0.8832	0.0092	0.0159	5.7388	5.3446	4.7878	4.9526	4.7823	4.8771	5.3426	5.8988	5.9222	5.9876	6.0621	5.3016
metab_1562	pos_1566	331.153	0.2618	0.9738	0.3692	0.4205	6.2815	6.3515	5.9295	6.5703	6.8985	6.1554	6.5176	7.0755	6.2966	6.2751	6.531	6.513
metab_1563	pos_1567	219.101	0.2702	1.029	0.3931	0.445	6.8423	6.8345	6.2195	6.869	7.3104	6.5221	6.3188	7.2575	6.3229	6.2766	6.5762	6.6993
metab_1564	pos_1568	227.127	1.1142	1.1798	0	0	5.6521	5.9438	5.8396	5.7904	5.7423	5.7899	4.9673	5.1826	4.8493	4.6526	4.9016	4.9073
metab_1565	pos_1569	341.138	0.4147	1.0476	0.215	0.2593	6.4537	6.6481	6.2904	6.6842	7.1511	6.2469	6.0923	7.0669	6.0248	5.7865	6.3374	6.3741
metab_1566	pos_1570	648.405	1.3802	1.3754	0	0.0001	5.4382	4.5903	5.6743	5.3694	4.6802	5.5301	3.7677	3.8754	3.7245	3.769	3.8414	3.7685
metab_1567	pos_1571	311.127	0.2408	1.0301	0.5011	0.5517	5.9617	6.2251	5.6973	6.3002	6.8247	5.7579	5.7699	6.772	5.6715	5.416	5.9878	6.0785
metab_1568	pos_1572	223.169	0.1599	0.9882	0.3563	0.4071	5.4417	5.3601	5.4098	5.3771	5.6156	5.3249	5.4891	5.6097	5.6027	5.3532	5.5588	5.3076
metab_1569	pos_1573	353.12	0.1337	0.9763	0.7433	0.7782	4.9754	5.0839	4.1995	4.9334	4.6585	4.8793	6.0573	4.1226	4.9715	5.1872	5.1579	3.929
metab_1570	pos_1574	609.144	0.0912	0.9656	0.8083	0.8369	3.7542	3.7868	6.6857	3.7927	3.7185	3.7279	5.3367	4.5266	3.386	4.345	5.3475	3.4261
metab_1571	pos_1575	718.323	0.3052	1.1185	0.6709	0.7106	1.7919	4.4773	1.7352	6.9412	4.2462	7.76	2.5956	4.8134	4.1453	3.6661	3.8156	5.057
metab_1573	pos_1577	308.221	1.3339	1.2098	0	0	7.1006	7.3523	7.259	7.1331	7.0743	7.0844	5.7689	6.132	6.0621	5.7957	5.9307	5.8549
metab_1574	pos_1578	546.29	0.8727	0.8565	0.0254	0.0387	5.8277	5.3978	4.1365	5.0936	4.1278	4.8931	5.7055	5.5455	6.0349	6.1056	5.8736	5.15
metab_1575	pos_1579	306.206	1.5132	1.3752	0	0	6.0078	6.2266	6.0901	5.969	5.9181	6.008	3.7466	4.7932	4.6089	4.2421	4.5261	4.4235
metab_1576	pos_1580	387.238	0.1209	0.9879	0.6898	0.7279	5.8756	5.6551	5.3885	5.8025	5.558	5.8837	6.2668	5.4288	5.7525	6.1553	5.4993	5.479
metab_1577	pos_1581	555.277	1.2076	0.7889	0.0013	0.0029	5.3891	4.9026	4.6228	4.8328	3.5292	4.8344	5.9441	5.6299	6.4304	6.1769	5.7962	5.658
metab_1578	pos_1582	137.06	0.9819	1.1208	0.0001	0.0002	6.7319	6.868	6.6344	6.8704	6.9113	6.5555	5.9316	6.456	5.958	5.7883	6.0982	5.9645
metab_1579	pos_1583	384.237	0.75	1.1152	0.0075	0.0134	4.9244	5.2883	4.778	5.3309	4.887	5.4663	4.4475	5.0711	4.4008	4.5226	4.3722	4.6918
metab_1580	pos_1584	466.264	0.0739	0.99	0.8335	0.8588	5.6171	4.7972	5.5975	5.4966	6.1885	4.846	5.7505	5.2245	5.9518	5.6095	5.2725	5.0663
metab_1581	pos_1585	192.174	0.0509	1.0055	0.9035	0.9197	4.1286	5.2754	4.5502	4.5644	4.0088	5.0629	4.6771	4.5028	4.6764	4.4818	4.5606	4.5375
metab_1582	pos_1586	451.175	0.7354	1.1251	0.0405	0.0587	5.7148	6.0887	5.1153	5.998	5.986	4.7121	5.1718	4.7354	5.551	4.7967	4.7604	4.8665
metab_1583	pos_1587	285.148	0.0966	0.9793	0.7053	0.7422	3.6576	4.6504	4.5134	4.1941	3.6219	4.0752	3.7305	4.7409	3.9879	4.21	4.1998	4.3639
metab_1584	pos_1588	405.189	0.933	1.1608	0.0004	0.0012	5.1315	5.3663	4.8104	5.3035	5.3217	5.3006	3.9639	4.6174	4.6465	4.5957	4.4059	4.6815
metab_1585	pos_1589	343.117	1.256	1.2147	0	0	6.1978	6.4469	6.52	6.579	6.6047	6.3177	5.1653	5.8692	5.2682	5.167	5.2512	5.1102
metab_1586	pos_1590	290.211	0.8599	1.136	0.0061	0.0111	5.674	6.0605	5.7356	5.7773	5.7551	5.9918	5.4878	4.4834	5.833	5.0502	5.0229	4.9266
metab_1587	pos_1591	249.185	1.0048	1.1445	0	0	5.7325	5.6178	5.9212	5.7333	5.9186	5.7211	5.0036	5.3036	4.9153	4.9981	5.0803	4.9697
metab_1588	pos_1592	419.241	0.9811	1.16	0.001	0.0024	5.6377	6.0669	5.616	5.9488	5.7541	6.0847	4.9307	5.5425	4.421	5.2675	4.9598	5.1439
metab_1589	pos_1593	646.27	0.1771	1.0336	0.6698	0.7097	4.8488	5.2225	4.8677	4.9822	4.8496	5.1004	4.3505	3.7632	5.8567	5.457	5.4811	3.9935
metab_1590	pos_1594	289.142	1.4023	1.3706	0	0	5.2352	5.5291	5.0449	5.3781	5.0329	5.3787	4.1743	3.6572	4.0971	4.0155	3.7187	3.3865
metab_1591	pos_1595	459.164	0.9012	1.1345	0.0021	0.0044	6.1783	6.0628	5.8398	6.1153	5.6893	5.8041	5.1809	4.8807	5.5039	5.2908	5.7883	4.8128
metab_1592	pos_1596	203.143	0.7521	1.0817	0.0006	0.0016	6.0327	6.0982	6.0057	5.9762	5.8891	5.9931	5.4129	5.8772	5.4245	5.6818	5.5985	5.2824
metab_1593	pos_1597	349.127	1.1277	0.5876	0.1062	0.1384	0.1533	0.741	5.2486	0.1651	4.198	4.8532	4.653	4.505	3.9876	3.9976	4.895	4.1044
metab_1594	pos_1598	537.211	0.3895	1.0457	0.2479	0.2948	6.3714	6.7114	5.7758	6.6918	7.0124	6.0058	5.9241	6.6923	6.1672	5.9965	6.2564	5.8484
metab_1596	pos_1600	211.096	0.8832	1.1067	0	0	5.7259	5.7416	5.9649	5.7641	5.6826	5.7744	5.1482	5.3685	5.1839	5.2266	5.2867	5.1024
metab_1599	pos_1603	285.039	1.1242	1.2476	0.0001	0.0005	5.1487	4.3451	5.5379	4.8953	5.2306	4.8386	3.9834	4.0911	3.9402	3.9848	4.0571	3.9843
metab_1601	pos_1605	425.251	0.3718	0.9643	0.1345	0.1705	5.906	6.0369	6.4072	5.9783	6.1537	6.1233	6.2755	6.6654	5.9581	6.649	6.3462	6.0681
metab_1602	pos_1606	235.096	1.1551	1.2458	0.0001	0.0004	4.9969	5.1124	5.197	5.207	5.2639	5.0023	4.1166	4.822	4.0131	4.0454	4.1267	3.5859
metab_1603	pos_1607	287.164	1.2062	1.2179	0	0	5.6476	5.8422	5.722	5.7437	5.5801	5.835	4.5572	4.9087	4.8432	4.5368	4.7406	4.6331
metab_1604	pos_1608	465.118	1.2015	1.5553	0.0448	0.0642	5.1264	5.1501	1.8631	5.6571	6.4575	5.5241	4.0482	3.5013	3.5618	1.1836	3.6409	3.2132
metab_1605	pos_1609	211.148	1.4771	1.4937	0	0	4.6077	4.8765	4.8613	4.5384	4.7928	4.5509	2.9794	3.7294	2.9363	2.9808	3.133	3.1396
metab_1606	pos_1610	263.091	1.1544	1.2436	0.0002	0.0007	5.0194	5.243	5.6697	5.3648	5.4245	5.2595	4.2313	4.7836	3.5602	4.391	4.4312	4.3208
metab_1607	pos_1611	357.133	0.8974	1.0993	0.0003	0.0007	6.8849	7.1082	6.8387	7.1484	7.2782	6.7936	6.2291	6.7011	6.4062	6.1345	6.4766	6.3057
metab_1608	pos_1612	355.117	1.3918	1.2595	0	0	6.5382	6.8447	6.7764	6.9042	6.8997	6.6574	5.1418	6.0122	5.2946	5.3625	5.4537	4.9858
metab_1609	pos_1613	337.199	1.2974	1.2463	0	0	5.891	6.246	5.91	6.1142	5.9869	6.2156	4.8426	5.0103	5.0147	4.6352	4.6993	4.9767
metab_1610	pos_1614	335.184	1.0738	1.1701	0	0	5.469	5.7238	5.7173	5.6833	5.3872	5.7886	4.8765	4.8563	4.8103	4.7671	4.7344	4.8183
metab_1611	pos_1615	409.256	0.4172	1.0573	0.1859	0.2276	5.3119	5.5675	5.0804	5.4235	5.1359	5.2785	4.8333	5.4907	4.3742	4.7407	5.572	5.0675
metab_1612	pos_1616	613.227	1.7114	1.5188	0	0	5.8623	5.6654	6.5407	6.1266	6.256	6.1365	4.3569	4.4604	3.7519	3.936	4.0284	3.5574
metab_1613	pos_1617	430.279	0.8281	1.163	0.0165	0.0265	4.7106	5.3737	4.6116	5.1687	4.2841	5.299	3.9968	4.6068	3.6349	4.5472	4.503	4.029
metab_1614	pos_1618	502.264	0.1365	0.9685	0.7264	0.7622	5.4936	4.835	6.3193	4.9774	3.6447	4.8118	5.7577	4.5409	6.0725	5.4816	4.7477	4.4641
metab_1615	pos_1619	219.065	1.4117	1.4486	0.0002	0.0006	4.7042	4.9024	4.9818	5.2713	5.2805	4.6228	3.1061	4.6074	3.0629	3.478	3.1798	3.107
metab_1618	pos_1622	435.325	1.0673	1.2573	0.0145	0.0236	5.5918	6.3283	4.1566	6.0036	5.9511	6.1855	4.4304	5.3997	3.8421	4.907	4.4471	4.1895
metab_1619	pos_1623	407.241	0.4354	1.0478	0.0541	0.0759	5.2344	5.216	4.8312	5.1238	4.9697	4.8871	5.0746	4.8215	4.8375	4.4786	4.8794	4.7907
metab_1620	pos_1624	275.2	0.6759	1.0465	0	0.0001	7.6549	7.6466	7.6871	7.5607	7.5438	7.5915	7.1727	7.4302	7.281	7.3224	7.273	7.1781
metab_1621	pos_1625	359.289	1.5127	2.1156	0.0079	0.014	2.3028	4.0624	2.2454	5.2313	6.0991	5.4312	1.9762	2.0829	1.9335	1.9776	2.0492	1.9771
metab_1623	pos_1627	546.197	1.0144	1.1831	0.0047	0.0089	7.0671	5.4998	6.5936	6.1639	5.8724	5.4408	5.1381	5.2458	5.0949	5.1395	5.2118	5.1389
metab_1624	pos_1628	223.169	0.2491	1.0211	0.3213	0.372	5.6734	5.5823	5.9106	5.5775	5.5308	5.4693	5.3852	5.8806	5.4319	5.3275	5.6801	5.3431
metab_1625	pos_1629	257.19	0.8045	1.0952	0.0004	0.001	5.9907	6.008	5.9697	5.9351	5.8715	5.9185	5.1933	5.7427	5.1668	5.6181	5.5318	5.3406
metab_1626	pos_1630	247.205	0.4612	1.057	0.0913	0.121	5.5545	4.9712	5.4537	5.1495	5.2341	5.0296	4.711	5.3724	4.6991	5.2483	4.8675	4.7991
metab_1629	pos_1633	230.248	0.4339	1.0409	0.0936	0.1238	6.545	6.8962	6.7134	7.1931	7.1689	7.2834	6.5826	6.4764	6.5455	6.9325	6.6494	6.9697
metab_1630	pos_1634	406.352	0.2725	1.0187	0.1595	0.1985	6.8754	6.9468	6.7858	7.0442	7.1633	7.3189	6.8549	6.793	6.996	6.9561	6.8705	6.8864
metab_1631	pos_1635	410.221	0.744	0.9022	0.0062	0.0113	5.3723	4.8699	5.1185	4.6001	4.4308	4.6063	5.3663	5.5129	5.255	5.294	5.2823	5.4308
metab_1632	pos_1636	290.268	0.5888	1.0557	0.0031	0.0063	5.8714	6.0337	5.8351	6.1288	6.3552	6.1472	5.7241	5.7002	5.6583	5.7458	5.8333	5.7888
metab_1633	pos_1637	288.289	0.7079	1.0635	0.0001	0.0004	6.485	6.4508	6.4159	6.7315	6.574	6.556	6.3009	6.1439	6.1408	5.9658	6.1541	6.1708
metab_1634	pos_1638	266.173	0.6188	0.9426	0.0014	0.0032	5.4058	5.2707	5.3046	5.5535	5.3037	5.5034	5.7505	5.7417	5.7545	5.4418	5.7597	5.8594
metab_1635	pos_1639	415.233	0.69	1.0922	0.0257	0.0391	5.5339	6.11	6.3568	5.8355	5.7122	5.6915	5.2044	5.1179	5.9608	5.0108	5.581	5.3848
metab_1637	pos_1641	200.237	0.4505	1.0433	0.0181	0.0288	5.065	5.1045	5.1168	5.3409	5.5053	5.4064	4.9919	4.9766	5.0624	5.0494	5.0881	5.0581
metab_1639	pos_1643	455.225	1.2814	1.3312	0.0021	0.0045	5.0628	5.7215	6.5557	5.5236	5.6539	5.6814	3.4392	3.8796	5.1764	3.8596	5.0232	4.3145
metab_1640	pos_1644	353.138	1.4334	1.3826	0	0.0001	5.2469	5.5139	5.938	5.4895	5.7498	5.062	4.1487	3.5906	4.2922	4.2398	3.5566	4.0413
metab_1641	pos_1645	233.081	1.6671	1.5331	0	0	5.9286	5.9188	5.4353	5.8428	5.7081	5.5246	3.5492	4.1843	4.3115	3.3773	3.6108	3.3767
metab_1642	pos_1646	411.271	0.5091	1.0648	0.1188	0.1527	5.6841	6.1373	5.8458	6.0925	5.9367	6.2849	5.8743	6.0878	4.9037	5.2658	6.0851	5.5724
metab_1643	pos_1647	355.245	0.756	0.8997	0.0204	0.0319	5.282	5.6514	4.4938	5.4609	5.4599	5.7157	5.6667	6.4442	5.8042	6.1062	5.739	5.8783
metab_1644	pos_1648	416.29	0.2841	1.0694	0.487	0.5381	5.2336	3.5659	4.8634	4.89	4.9861	5.2311	4.7234	3.9819	3.1612	5.6011	4.3916	5.0443
metab_1646	pos_1650	214.18	0.0169	1.001	0.8882	0.9063	5.7206	5.7613	5.7211	5.8793	5.8437	5.9287	5.7754	5.8222	5.8124	5.7056	5.8402	5.8623
metab_1647	pos_1651	263.091	0.8927	1.1292	0.0001	0.0003	4.9903	5.259	5.6265	5.231	5.0807	5.1112	4.5952	4.7029	4.552	4.5966	4.669	4.5961
metab_1648	pos_1652	280.263	1.1842	1.1852	0.0001	0.0003	7.1356	6.9987	6.438	6.9531	6.9652	6.8636	6.3339	6.0479	5.6754	5.7728	5.6512	5.4063
metab_1649	pos_1653	401.159	0.8856	1.1351	0.0014	0.0032	5.2518	5.4321	5.9467	5.2027	5.7277	5.4096	4.7168	5.0453	4.8174	5.0551	4.9499	4.46
metab_1650	pos_1654	258.076	1.6878	1.6488	0	0	5.1787	5.0189	4.8094	5.5733	5.0391	6.1845	3.0863	3.194	3.4329	3.3273	3.16	3.0872
metab_1651	pos_1655	258.112	1.494	1.4605	0	0	5.2492	5.201	4.9301	5.194	5.0714	5.3953	3.7527	3.433	3.2007	3.3831	3.4165	4.0679
metab_1652	pos_1656	669.416	1.0687	1.2287	0.0036	0.0071	5.4123	5.0475	6.0228	5.0065	5.0781	5.3789	4.3082	5.2115	4.4149	3.6774	4.3952	3.9936
metab_1653	pos_1657	321.168	1.0164	1.1423	0	0	5.782	5.9967	5.9508	5.9539	5.9246	6.0857	5.1789	5.4685	5.2259	5.0101	5.1646	5.2011
metab_1654	pos_1658	386.326	0.3254	0.9408	0.3419	0.3929	4.2101	4.5681	4.1234	4.3767	4.1454	4.6219	5.5721	4.956	4.2921	4.8739	4.1372	3.853
metab_1655	pos_1659	398.289	0.3084	0.9657	0.3337	0.3847	5.6368	6.0651	4.9232	6.0269	5.7248	6.1984	6.0849	6.0366	5.6941	6.1571	6.0288	5.8083
metab_1656	pos_1660	302.305	0.6726	1.0682	0.0025	0.0051	6.1771	6.3402	6.1447	6.4843	6.4953	6.7765	5.9591	5.8697	6.0293	6.1219	6.0263	5.9563
metab_1657	pos_1661	536.334	0.6323	0.9375	0.0116	0.0195	6.0454	6.5794	6.1217	6.1479	6.2644	5.6636	6.3942	6.6325	6.5372	6.4511	6.7477	6.5108
metab_1658	pos_1662	700.438	1.1357	1.3616	0.0272	0.0412	7.0053	5.5506	4.0443	6.6573	4.3906	4.0757	4.0146	4.1606	3.7298	3.7744	3.8468	3.7739
metab_1660	pos_1664	425.288	0.3029	0.9451	0.4345	0.4869	4.0262	4.6132	4.8695	5.0302	4.742	5.4335	3.759	5.6497	5.2007	5.2027	5.6131	4.9561
metab_1661	pos_1665	332.315	1.7595	1.6243	0	0	6.2914	6.3135	4.9583	6.2988	5.565	5.9619	3.4958	3.6035	3.7858	3.4972	3.7887	3.6138
metab_1662	pos_1666	449.304	1.023	1.1735	0.0006	0.0016	5.6401	6.4136	5.2721	6.0363	5.7609	6.1376	4.9305	5.0745	4.892	4.806	5.1886	5.156
metab_1663	pos_1667	225.148	1.2595	1.2691	0.0001	0.0002	5.5584	5.7768	5.6299	5.6954	5.6195	5.7869	4.4596	4.776	4.8638	3.6669	4.7102	4.3704
metab_1664	pos_1668	334.235	0.4066	1.0305	0.0061	0.0111	5.3046	5.4651	5.2058	5.408	5.3305	5.482	5.1945	5.1589	5.1904	5.2145	5.2732	5.2125
metab_1665	pos_1669	141.127	0.1467	1.0157	0.5884	0.6345	4.1626	4.7181	4.5191	4.295	4.3012	4.4126	4.2745	4.6891	4.0292	4.4778	4.2675	4.2617
metab_1666	pos_1670	308.221	1.4147	1.3067	0	0	5.9256	6.1071	5.926	5.9457	5.825	6.0611	4.6411	4.6449	4.6061	4.6912	4.5772	4.2312
metab_1667	pos_1671	109.065	1.1521	1.1979	0	0	5.7019	5.9468	5.5146	5.8201	5.6812	5.802	4.7307	5.0104	4.6897	4.6859	4.897	4.7589
metab_1668	pos_1672	557.308	0.2615	1.0263	0.3187	0.3692	5.6907	6.184	5.3932	5.9899	5.7842	6.0332	5.5904	5.6101	6.1	5.6052	5.7103	5.5605
metab_1671	pos_1675	324.216	1.2222	1.2149	0	0.0001	6.1754	6.4009	6.063	6.3083	6.1973	6.338	5.1271	5.0303	5.68	5.2712	4.9836	4.7619
metab_1672	pos_1676	194.117	1.3822	1.3856	0	0	4.7802	5.0645	4.7694	5.0062	4.8916	5.1777	3.7538	3.5195	3.8135	3.8391	3.2064	3.2944
metab_1673	pos_1677	382.294	0.6789	0.9282	0.0026	0.0054	5.1718	5.0087	5.5897	5.2398	5.4593	5.4228	5.7985	5.8066	5.4593	5.7956	5.7995	5.6989
metab_1675	pos_1679	263.164	1.8364	1.9165	0.0003	0.0008	5.562	5.5091	5.6035	5.4226	5.4445	5.3688	3.5483	4.0623	3.3067	1.2651	3.4744	1.5125
metab_1676	pos_1680	653.401	1.794	1.8265	0.0009	0.0022	7.133	5.9501	5.6016	6.8547	4.9362	4.9017	5.3481	2.8839	2.7333	2.7778	2.85	2.7773
metab_1678	pos_1682	346.331	0.7268	1.083	0.0012	0.0027	6.0564	6.1867	5.5335	6.0835	5.8158	5.8529	5.5547	5.3861	5.4379	5.3918	5.533	5.5006
metab_1680	pos_1684	344.315	1.0108	1.2003	0.0024	0.0049	5.6527	5.7212	4.9253	5.7549	5.5006	5.5548	5.0452	3.832	4.9638	4.3456	4.9054	4.4916
metab_1682	pos_1686	181.122	1.5927	1.3619	0	0	6.6913	6.634	6.6316	6.6351	6.563	6.6524	4.8429	5.0351	4.7361	4.8461	4.9885	4.7821
metab_1683	pos_1687	221.153	1.1137	1.1611	0	0	6.2034	6.2332	6.4356	6.1866	6.2149	6.1813	5.3118	5.4836	5.3143	5.4049	5.4263	5.3156
metab_1684	pos_1688	795.334	0.9815	0.8756	0.0001	0.0005	5.1842	5.1374	5.7693	5.341	5.7135	5.0785	6.1368	6.1156	6.1941	6.018	6.0495	6.2892
metab_1685	pos_1689	281.101	0.0334	0.998	0.825	0.8512	5.8796	5.7083	6.0353	5.9971	5.9849	5.888	5.8919	5.9809	5.8997	5.8404	5.9352	6.0205
metab_1687	pos_1691	388.305	0.0122	0.9974	0.9561	0.964	6.3897	5.7461	6.3191	6.1303	6.8044	6.1361	6.9093	6.8148	5.6849	6.6479	5.9426	5.6207
metab_1688	pos_1692	393.225	0.947	1.1196	0	0	5.9912	6.0225	6.2215	5.9536	6.0982	5.894	5.2467	5.5372	5.3514	5.4202	5.4596	5.3006
metab_1689	pos_1693	721.391	0.534	0.9292	0.1009	0.1323	4.4246	5.0081	4.5443	5.2488	5.6571	5.2014	5.3459	5.0307	5.664	5.2669	5.5754	5.4908
metab_1690	pos_1694	396.273	0.9952	1.2233	0.0079	0.0139	4.9309	5.4032	4.7457	5.3907	5.1027	5.3599	4.8403	4.1722	3.6506	3.6951	5.1503	3.7812
metab_1691	pos_1695	304.175	0.6881	1.0608	0	0	6.0324	6.1419	6.1212	5.981	6.0225	6.1052	5.6788	5.7299	5.6758	5.6468	5.7619	5.8205
metab_1692	pos_1696	319.226	1.3979	1.3074	0	0	6.0214	6.258	5.8571	6.1715	5.9596	6.1708	4.2886	5.2126	4.2454	4.798	4.7794	4.5456
metab_1693	pos_1697	180.081	1.057	0.8361	0.0002	0.0007	4.6336	4.6359	4.1851	4.8654	4.3672	4.806	5.4252	5.3655	6.026	5.2595	5.585	5.2171
metab_1694	pos_1698	249.206	0.2588	1.0155	0.07	0.0951	5.4691	5.5268	5.6174	5.6007	5.5441	5.6834	5.5119	5.501	5.5058	5.3716	5.4618	5.5803
metab_1695	pos_1699	439.269	0.1496	0.9862	0.497	0.5474	6.0601	6.3238	6.3933	6.3287	5.8854	5.9781	6.0444	6.4214	6.0213	6.1019	6.4542	6.4468
metab_1697	pos_1701	232.169	0.4399	0.9216	0.3379	0.3889	4.8723	5.6951	4.7291	5.55	5.5045	5.1641	6.1917	4.4963	7.2052	6.2021	5.2909	4.8149
metab_1698	pos_1702	381.262	0.9168	1.1401	0.0005	0.0013	5.5085	5.6758	5.2916	5.6295	5.4854	5.5256	4.8428	5.3509	4.4399	4.93	4.6898	4.7924
metab_1699	pos_1703	473.288	1.4473	1.4178	0.0002	0.0007	5.5402	5.9739	5.0679	5.8921	5.5419	5.7015	3.2835	4.9434	3.2403	4.2627	4.2298	3.8216
metab_1700	pos_1704	511.304	0.9941	1.168	0.0004	0.0011	5.4331	5.8733	4.986	5.9839	5.3089	5.6182	4.7147	4.8224	4.6715	4.7161	4.7885	4.7156
metab_1701	pos_1705	249.221	0.5045	1.0535	0.0142	0.0232	5.0898	5.0231	5.1397	4.9971	4.9929	4.9959	4.6797	4.9683	4.4849	4.7072	5.0337	4.8298
metab_1702	pos_1706	492.368	0.9825	0.8416	0.0077	0.0137	4.2759	5.1968	4.2182	4.9135	5.0578	5.2759	6.6244	5.4473	5.3242	5.5745	5.4838	5.9327
metab_1704	pos_1708	378.265	0.8937	1.1008	0	0	6.2446	6.39	6.232	6.5885	6.346	6.283	5.7256	5.8207	5.7903	5.7964	5.6204	5.8428
metab_1705	pos_1709	479.261	1.2562	0.807	0.0004	0.0011	5.3326	5.6366	6.4442	5.0551	5.5189	4.7551	6.6195	6.9667	6.5493	6.6406	6.7109	7.0821
metab_1706	pos_1710	129.054	0.0239	1.0028	0.8761	0.8959	5.0225	4.7537	5.1605	5.1254	5.1826	5.2684	4.98	5.0681	5.1116	5.1186	4.9731	5.1836
metab_1707	pos_1711	304.19	0.0974	1.0175	0.836	0.8611	5.1016	5.4599	5.4132	5.0136	5.1341	4.9093	5.8298	3.9723	6.3405	5.725	4.2313	4.4013
metab_1709	pos_1713	279.195	1.6277	1.38	0	0	6.7251	6.7348	6.6816	6.7001	6.7272	6.5875	4.7206	5.1751	4.8341	4.8618	4.8654	4.6452
metab_1710	pos_1714	425.156	0.6869	1.1302	0.0862	0.1149	5.2441	4.7632	5.3929	5.5569	6.3449	4.7848	4.4015	5.6691	4.3583	5.0877	4.4753	4.4024
metab_1711	pos_1715	273.184	1.2131	1.1854	0	0	6.4951	6.6068	6.5854	6.5683	6.5393	6.5571	5.5543	5.6773	5.5054	5.6717	5.4123	5.3761
metab_1712	pos_1716	428.337	1.1102	1.2117	0.0029	0.0058	5.8375	6.1882	6.407	6.628	5.4021	7.2041	4.9353	5.051	4.9975	5.1619	5.2472	5.6955
metab_1715	pos_1719	373.167	1.0607	0.8439	0.0002	0.0005	5.0593	5.014	4.1396	4.945	4.7082	4.507	5.6411	5.6024	5.4723	5.5219	5.6661	5.722
metab_1716	pos_1720	354.263	1.0364	1.1431	0	0	6.1579	6.3088	6.1371	6.2577	5.9974	6.2353	5.4864	5.6791	5.2406	5.4993	5.2981	5.243
metab_1717	pos_1721	715.402	1.3475	0.733	0.0017	0.0036	3.886	5.0101	3.8283	4.4293	3.9233	4.7269	4.8899	6.4247	5.236	5.5146	6.7259	6.4176
metab_1718	pos_1722	268.227	0.0335	0.9983	0.7907	0.8214	5.7957	5.7739	5.8237	5.8909	5.803	5.959	5.8435	5.9095	5.8184	5.8613	5.7778	5.8928
metab_1719	pos_1723	518.323	0.8382	0.9211	0.001	0.0024	6.8992	7.0694	6.99	7.0087	6.6965	6.8701	7.4653	7.1215	7.8417	7.2666	7.804	7.5922
metab_1720	pos_1724	230.154	0.5589	0.9216	0.122	0.1565	5.2804	5.7963	5.5144	5.5914	5.5283	5.51	6.3304	5.2661	6.7007	6.6952	5.7769	5.2772
metab_1721	pos_1725	532.29	1.0495	1.2973	0.0185	0.0292	4.3413	4.9592	4.328	6.6317	4.8969	4.3243	3.3898	3.4975	3.9833	3.3912	4.2561	4.2126
metab_1722	pos_1726	358.294	0.018	0.9954	0.9213	0.9345	5.0862	4.3943	5.8884	4.7306	4.6084	5.0234	5.0889	4.8891	5.1275	5.1609	4.9358	4.6673
metab_1724	pos_1728	429.271	0.0636	0.9939	0.8142	0.8415	5.5843	5.8207	5.215	5.6506	5.6169	5.5842	5.744	5.3106	5.9651	5.8459	5.5712	5.2435
metab_1725	pos_1729	308.221	1.3445	1.2313	0	0	6.6644	6.8152	6.978	6.6886	6.6881	6.5983	5.4408	5.7226	5.6434	5.3183	5.4758	5.2359
metab_1726	pos_1730	111.117	0.8351	1.1037	0	0	5.225	5.3455	5.5546	5.307	5.2978	5.2623	4.7957	4.8894	4.9129	4.7398	4.8195	4.8296
metab_1727	pos_1731	527.334	1.1541	1.1791	0.0004	0.001	7.089	7.3504	6.4641	7.2293	7.0259	7.1386	5.9269	6.6285	5.7104	6.2133	5.5252	5.8683
metab_1728	pos_1732	558.436	0.4964	1.0291	0.0013	0.003	7.1971	7.2573	7.3318	7.4127	7.2606	7.4869	7.0477	7.1351	7.1637	7.1269	7.1217	7.1088
metab_1730	pos_1734	263.2	1.1876	1.1942	0	0	6.1126	6.1528	6.0476	6.1397	6.0535	6.0258	5.0067	5.3801	5.0627	5.0045	5.0477	5.0948
metab_1731	pos_1735	371.257	0.701	1.0834	0.0077	0.0136	6.1321	6.36	5.5732	6.2157	6.1002	6.2629	5.4797	5.8485	5.8355	5.3766	5.7779	5.5026
metab_1732	pos_1736	194.081	1.2984	1.383	0.0005	0.0014	4.98	5.2989	4.6249	5.659	3.949	5.1021	3.3439	3.799	3.3048	3.6938	3.2599	4.0107
metab_1733	pos_1737	390.102	1.8743	1.691	0	0	6.1529	6.3962	5.9021	6.7328	5.2912	6.1335	3.5007	4.0292	3.4575	3.502	3.6562	3.5015
metab_1734	pos_1738	339.289	0.0613	1.0104	0.823	0.8493	5.4373	5.7742	4.3222	5.8319	5.2072	5.3602	5.398	4.8354	5.4057	5.3016	5.2796	5.3819
metab_1736	pos_1740	515.335	1.3788	1.279	0	0	6.4692	6.7347	5.8566	6.6826	6.4917	6.6563	5.0943	4.8724	5.3317	4.8631	5.3765	4.873
metab_1737	pos_1741	416.276	0.0279	1.0061	0.8373	0.8623	6.0625	5.375	5.2977	5.4683	5.5964	5.6455	5.1802	5.2878	5.7111	5.8849	5.3872	5.788
metab_1738	pos_1742	457.294	1.5495	1.3397	0	0	6.6686	6.7788	6.4107	6.8084	6.4855	6.67	4.8265	5.2964	4.8762	5.0282	4.9454	4.7483
metab_1739	pos_1743	645.432	1.2416	1.2365	0	0	5.8006	5.67	5.8176	5.8995	5.819	6.2808	4.5964	5.0819	4.5532	4.8461	4.8598	4.5972
metab_1741	pos_1745	518.42	0.7554	1.1414	0.0623	0.0858	5.8787	6.0134	5.0405	6.2019	5.5821	6.047	5.3143	5.8915	3.7388	5.2626	4.9469	5.3027
metab_1742	pos_1746	98.9845	0.1621	1.0111	0.271	0.3191	4.9566	4.9705	5.0275	5.0391	4.9332	5.0907	4.8004	4.9267	4.9558	4.8935	5.0353	5.0758
metab_1743	pos_1747	405.261	1.1434	1.1719	0	0	6.7015	6.4858	6.3845	6.4667	6.6443	6.5432	5.4317	5.8585	5.2764	5.6933	5.6499	5.5641
metab_1746	pos_1750	277.18	1.906	1.7576	0	0	6.0661	6.0582	5.9976	5.8923	6.2004	5.8906	3.2386	3.7711	3.737	3.3082	4.0292	2.4613
metab_1747	pos_1751	950.453	0.9258	1.3083	0.0928	0.1229	7.3486	4.6225	3.8175	6.3594	3.8395	3.8489	4.049	4.1383	3.503	3.9054	3.6634	3.5471
metab_1748	pos_1752	703.386	0.6151	0.9362	0.0247	0.0379	6.0732	6.3351	5.7147	6.5225	5.7771	5.8242	6.6515	6.1059	6.5214	6.5142	6.3657	6.5581
metab_1749	pos_1753	296.258	0.3055	1.0165	0.0624	0.086	7.635	7.3118	7.3771	7.4198	7.3136	7.4088	7.2047	7.4044	7.2136	7.2901	7.3152	7.318
metab_1751	pos_1755	249.221	0.8601	1.096	0.0001	0.0002	6.6228	6.4918	6.7432	6.3717	6.3465	6.3795	5.6773	5.9341	6.0226	5.9565	5.8861	6.0666
metab_1752	pos_1756	551.352	1.2961	1.4128	0.0061	0.0111	5.1538	5.6425	5.2469	4.9948	5.8656	5.2742	4.6588	4.9695	2.4233	4.2803	2.6296	3.8173
metab_1753	pos_1757	364.284	0.0652	0.9937	0.7885	0.8194	6.0228	5.8897	6.2507	5.8239	6.1288	5.916	6.2538	6.1488	5.676	6.4473	5.8593	5.87
metab_1754	pos_1758	351.25	0.9379	0.8998	0.0001	0.0005	6.1629	6.3541	6.2855	6.0767	6.0851	6.0701	6.6862	6.7158	6.8279	6.5839	7.2366	7.1035
metab_1755	pos_1759	321.205	2.0469	2.1016	0	0.0001	5.7388	6.1062	5.6188	5.8795	5.9856	6.1564	3.2637	3.921	1.9334	1.9775	3.8088	1.977
metab_1756	pos_1760	439.356	0.5681	1.0503	0.0322	0.0478	7.1805	7.4982	7.1619	7.2738	7.1522	7.308	6.9682	7.457	6.4929	6.9056	6.7512	6.9106
metab_1757	pos_1761	346.294	1.0637	1.1834	0.0002	0.0006	5.8312	6.0806	5.3093	6.069	5.5721	6.3319	4.9005	4.8986	4.8306	4.9547	5.13	5.0259
metab_1758	pos_1762	231.138	0.6216	0.9327	0.0144	0.0235	5.4579	5.5883	5.2089	5.3302	5.453	5.3266	6.0136	5.4811	5.897	6.1476	5.7521	5.4084
metab_1759	pos_1763	428.336	1.29	1.227	0	0	6.3515	6.5452	6.3117	6.5672	6.2013	6.9001	5.2421	5.4062	5.3075	5.4109	5.1623	5.1596
metab_1760	pos_1764	510.377	1.6646	1.6746	0.0001	0.0002	5.0527	5.4835	4.876	5.6661	4.7562	6.3655	3.1921	2.582	3.5686	3.538	2.5481	3.8011
metab_1761	pos_1765	370.294	0.5725	1.0694	0.0525	0.0739	6.2868	6.3	5.5786	6.0563	6.0694	6.0607	6.0208	5.9625	5.3746	5.8689	5.6264	5.1428
metab_1762	pos_1766	629.35	0.865	0.85	0.0265	0.0402	4.7892	5.9233	4.6331	4.9731	4.2179	4.76	5.8628	6.2558	6.1907	4.6881	5.9514	5.5233
metab_1764	pos_1768	461.362	1.5306	1.3603	0	0	6.3179	6.689	6.2278	6.6815	6.4709	7.0491	5.5987	4.5377	4.6421	4.531	4.8607	4.8201
metab_1766	pos_1770	565.37	1.0774	1.2138	0.009	0.0157	5.9584	6.343	6.2716	6.0654	6.389	6.0403	4.9737	6.1635	4.3793	6.0057	4.6847	4.3353
metab_1767	pos_1771	697.391	1.1996	0.7592	0.0065	0.0118	4.7117	5.2858	4.3536	4.7494	4.5226	2.674	5.4503	5.7653	5.6447	5.6873	6.6279	5.465
metab_1768	pos_1772	195.174	0.1504	1.0094	0.2935	0.3429	5.201	5.3288	5.1954	5.3594	5.2697	5.3342	5.0892	5.2405	5.2186	5.2194	5.2931	5.3314
metab_1769	pos_1773	497.287	1.6569	1.5366	0.0001	0.0004	6.5356	6.309	5.3983	6.3512	5.9897	6.0848	4.2997	4.9519	2.7145	3.9827	4.2713	3.6423
metab_1770	pos_1774	383.257	1.1523	1.22	0	0.0001	5.8696	5.5752	5.4551	5.4723	4.9643	5.441	4.4541	4.5619	4.4109	4.4555	4.5279	4.455
metab_1772	pos_1776	681.419	1.3239	1.3401	0.0011	0.0025	5.4031	6.7888	5.9343	5.674	5.3769	4.6972	3.9673	4.5778	3.8675	4.4259	4.5293	3.9115
metab_1774	pos_1778	382.294	0.683	1.0749	0.0023	0.0048	5.9236	6.1606	5.6662	6.0121	5.9049	5.9976	5.4909	5.6834	5.3547	5.7362	5.2689	5.6449
metab_1775	pos_1779	70.0656	0.2951	0.9796	0.0468	0.0667	4.9534	4.9807	5.0738	5.0039	4.9107	5.0998	5.0374	5.1644	5.0665	5.007	5.1355	5.2381
metab_1776	pos_1780	533.324	0.92	1.2541	0.0852	0.1137	5.4733	5.322	5.2446	5.2462	5.1337	5.1178	4.034	6.5701	2.6464	4.6713	3.9831	3.2407
metab_1777	pos_1781	570.437	1.2664	1.2605	0	0.0002	5.3535	5.792	5.9923	5.8482	5.692	5.8179	4.51	5.2573	4.2572	4.6092	4.3898	4.3418
metab_1778	pos_1782	547.36	1.0075	1.1454	0.0005	0.0013	6.2406	6.3439	6.701	6.2195	6.36	6.0894	5.0955	5.984	5.7109	5.3107	5.6823	5.3521
metab_1779	pos_1783	683.436	1.024	1.2296	0.012	0.0202	4.7715	6.4791	5.8054	4.672	5.0906	5.3462	4.5845	5.0955	4.0113	4.2852	4.1282	4.0554
metab_1782	pos_1786	490.389	1.097	1.2022	0.0007	0.0017	6.0002	6.2095	5.1866	6.1825	5.6995	5.9719	4.7914	5.4817	4.6252	5.0054	4.672	4.7447
metab_1784	pos_1788	366.3	0.733	0.927	0.0063	0.0115	6.659	6.2257	6.5853	6.3339	6.4729	6.1428	7.0929	6.9263	6.4907	7.3547	6.766	6.8136
metab_1785	pos_1789	228.232	0.3932	1.0244	0.012	0.02	6.7252	6.6218	6.5038	6.5924	6.4583	6.47	6.3037	6.4247	6.3407	6.4647	6.4777	6.424
metab_1787	pos_1791	477.356	1.36	1.3338	0.0008	0.0019	5.9259	6.298	5.7676	6.0749	5.7808	6.042	3.9771	5.9492	4.0737	4.3373	4.518	4.0576
metab_1788	pos_1792	407.327	1.3308	1.2682	0	0.0001	5.9899	6.4109	5.8664	6.3962	6.5081	6.5861	5.2719	5.3444	4.4857	4.9778	4.783	4.9068
metab_1789	pos_1793	557.292	0.0578	0.9949	0.9023	0.9188	4.719	4.9881	4.4045	5.0457	5.495	5.6666	5.1347	5.0923	4.912	5.3469	4.8877	5.0993
metab_1790	pos_1794	590.425	0.1292	0.9906	0.5345	0.5831	5.7438	6.015	5.6984	5.9903	5.8695	6.2627	6.0455	5.9739	6.0179	5.9763	5.9124	5.9872
metab_1793	pos_1798	843.449	1.9664	0.5791	0	0	3.78	3.8126	3.7871	3.8184	3.7443	3.7537	5.9576	6.9963	6.0423	6.6013	7.0216	6.5749
metab_1795	pos_1800	524.43	0.5577	1.0703	0.0383	0.0558	5.4148	5.6883	5.1154	5.4958	5.1125	6.0487	5.0692	5.2804	5.1465	4.9984	5.1126	5.1097
metab_1796	pos_1801	332.258	0.9406	0.7787	0.0611	0.0844	3.836	4.0649	3.7783	4.2283	3.8003	3.8097	6.7464	3.8032	5.9516	5.6936	3.5808	4.4295
metab_1797	pos_1802	494.383	1.6485	1.5145	0	0	5.5445	6.0854	5.7409	5.7665	5.6329	6.2153	3.5335	4.7153	3.6335	4.1973	3.5477	3.4748
metab_1798	pos_1803	711.428	0.735	0.891	0.0297	0.0445	4.7234	5.3843	5.4684	4.7619	5.2746	4.8975	5.7152	6.2715	4.8482	6.0298	5.9201	5.4585
metab_1799	pos_1804	537.354	0.5355	1.0872	0.1999	0.2431	5.5418	5.7581	5.5829	5.3662	5.4899	5.4844	4.6496	6.4886	5.3533	5.1628	4.548	4.355
metab_1801	pos_1806	679.381	1.5478	0.7202	0.0001	0.0004	5.6219	4.0146	4.7895	4.0204	5.3532	4.4732	6.1157	6.6969	6.3334	6.5181	7.0158	6.5762
metab_1802	pos_1807	437.324	0.0007	0.9998	0.9955	0.996	5.5421	5.7408	4.7901	5.7721	5.671	5.3519	5.6703	5.987	5.1146	4.9715	5.6554	5.4767
metab_1803	pos_1808	393.351	0.9834	1.1378	0.0001	0.0004	5.8753	6.0657	6.208	6.3003	6.1085	6.6356	5.6996	5.4794	5.2246	5.4474	5.3928	5.445
metab_1804	pos_1809	497.324	1.4981	1.3336	0	0.0001	7.0306	7.1699	6.2662	7.0982	6.9054	6.8549	5.2936	4.6569	5.8938	4.5505	5.2778	5.319
metab_1806	pos_1811	539.334	1.6445	1.5252	0	0	5.9359	5.914	5.1436	5.742	5.8039	5.5425	3.575	4.4383	3.5318	3.5764	3.6487	3.5759
metab_1807	pos_1812	515.371	0.5121	1.0498	0.0594	0.0824	6.7369	6.8359	6.2576	6.6552	6.5145	6.4714	6.0194	6.7955	6.4198	6.1391	6.1432	6.0833
metab_1808	pos_1813	419.313	1.1988	1.2016	0	0	6.0117	6.2584	6.5804	6.0737	6.1238	6.0769	4.8961	5.449	5.0486	5.1489	5.2884	5.0625
metab_1809	pos_1814	501.391	0.4922	0.9351	0.1333	0.1692	6.1782	5.8958	5.3507	5.7071	5.6474	5.0181	6.0126	6.5261	6.5075	5.7372	5.8893	5.4726
metab_1810	pos_1815	309.242	0.5248	1.0552	0.0589	0.0818	6.5815	7.04	6.1681	6.7447	6.3564	6.5363	6.098	5.9646	6.6048	6.0295	6.4566	6.2112
metab_1811	pos_1816	342.3	0.5392	0.9435	0.0529	0.0744	5.7819	5.6784	6.4762	5.9321	6.064	6.3113	6.5674	6.5577	6.0229	6.7342	6.2219	6.316
metab_1812	pos_1817	238.216	0.3592	1.0248	0.0203	0.0317	5.7759	5.7255	5.5266	5.6222	5.5117	5.547	5.4016	5.5398	5.4681	5.4844	5.5295	5.466
metab_1815	pos_1820	576.331	0.0011	1.0008	0.9839	0.9864	4.5636	5.0405	5.6113	5.0714	5.5826	5.6119	5.2743	4.9394	5.2652	5.3941	5.1743	5.4106
metab_1816	pos_1821	341.283	0.5281	0.9231	0.1214	0.1558	4.9399	5.6923	4.931	5.0833	5.1512	5.2489	5.5923	6.5595	4.8272	5.6515	5.4546	5.5449
metab_1817	pos_1822	345.242	1.411	1.4412	0.0006	0.0016	4.6546	5.1916	6.6096	5.0262	4.8151	4.6072	3.8283	3.9323	3.3494	3.4741	3.4663	3.3934
metab_1818	pos_1823	465.334	0.7831	1.1327	0.0157	0.0254	5.6926	5.8282	4.9611	5.6774	5.5186	5.5101	4.4923	5.3412	4.4657	4.7774	4.6759	5.547
metab_1820	pos_1825	385.292	0.7577	1.0708	0	0	6.4363	6.5308	6.2506	6.4744	6.3418	6.4512	5.9508	6.0687	5.9181	5.9399	6.0238	6.0377
metab_1821	pos_1826	669.331	1.315	1.2586	0	0.0002	6.8539	6.1762	6.3365	6.4719	6.5043	6.7034	5.555	4.7677	5.0958	5.3084	5.6632	4.6329
metab_1822	pos_1827	391.298	1.6905	1.6961	0.002	0.0043	6.0093	6.4097	5.5902	6.1613	5.6754	5.7545	5.2548	3.6205	3.9128	4.534	1.8701	1.7983
metab_1823	pos_1828	380.336	0.7257	1.0674	0	0.0002	6.4499	6.5481	6.2503	6.5349	6.38	6.5315	5.996	6.0761	5.9928	5.9939	5.9948	6.1998
metab_1825	pos_1830	536.43	1.089	1.1793	0.0009	0.0022	6.4265	6.5975	6.0107	6.5336	6.3603	6.5429	5.0212	6.2846	5.6392	5.3526	5.1185	5.206
metab_1826	pos_1831	198.127	0.2772	1.0152	0.029	0.0436	5.5815	5.6672	5.6678	5.6957	5.6622	5.8065	5.5736	5.6276	5.5982	5.5563	5.5675	5.6488
metab_1827	pos_1832	108.081	0.25	1.0108	0.0669	0.0917	7.2722	7.3156	7.3752	7.405	7.3283	7.5073	7.256	7.3206	7.2817	7.2424	7.2644	7.3627
metab_1828	pos_1833	518.42	0.2727	1.0329	0.4104	0.4625	6.0009	6.2447	5.1732	6.0878	5.5096	5.9672	5.5008	6.2854	5.3419	5.7585	5.4852	5.4969
metab_1830	pos_1835	611.466	0.1851	1.0162	0.4662	0.5181	5.9786	6.1779	6.3787	5.8222	5.7431	5.6887	5.7469	5.6754	5.9226	6.0916	5.8464	5.936
metab_1834	pos_1839	391.282	1.2931	1.3641	0.0008	0.0019	5.6175	5.5285	4.6372	5.3964	5.0873	4.4149	3.9178	4.411	3.2321	3.9476	3.8973	3.0871
metab_1835	pos_1840	819.449	2.8177	0.0644	0	0	0.3874	0.4069	0.3542	0.4105	0.3666	0.372	5.2418	6.5862	5.4871	6.1005	6.4005	5.8487
metab_1836	pos_1841	94.0654	0.2561	1.0171	0.072	0.0976	4.9	5.0988	5.0223	5.0409	5.1466	5.1698	4.9234	5.0127	4.9977	4.9798	4.9536	4.9992
metab_1837	pos_1842	506.42	1.9763	1.992	0	0	5.7437	6.1036	4.722	6.0587	5.5669	6.0246	2.6868	2.7943	2.6437	3.6043	2.7604	2.6877
metab_1838	pos_1843	657.397	1.2757	0.8195	0.0001	0.0002	6.1102	5.9918	5.2158	5.2432	5.5682	5.3392	6.4832	6.9347	6.7355	6.7695	7.1398	6.7804
metab_1839	pos_1844	593.477	1.1657	0.8021	0.0021	0.0044	4.3565	5.0471	5.8224	4.7518	4.5252	4.7352	6.1101	5.6281	5.6936	5.7099	6.7984	6.5087
metab_1840	pos_1845	393.347	0.6058	1.0848	0.0312	0.0464	5.5792	5.1678	5.0439	5.195	5.2398	5.3193	4.5426	5.2678	4.6686	4.652	5.3409	4.6127
metab_1841	pos_1846	427.356	1.2081	1.1802	0	0	7.0137	7.1323	6.7263	7.0543	6.8511	6.9656	6.2303	6.1513	5.6693	5.699	5.7879	5.8346
metab_1842	pos_1847	315.231	1.9208	1.6939	0	0	6.9809	6.8157	5.6269	6.7808	6.4066	6.5099	3.6123	3.6565	4.1736	4.1911	3.9093	3.5497
metab_1843	pos_1848	633.469	0.7	0.9298	0.0143	0.0235	6.2311	6.289	6.2815	6.4197	6.2665	6.6385	6.8335	6.5551	6.5097	6.5542	7.3748	7.1782
metab_1844	pos_1849	557.381	1.5167	1.5522	0.0053	0.0099	6.0448	6.4073	5.1735	6.2399	5.9126	6.0626	4.6077	5.1823	2.1286	5.2528	2.2448	3.6744
metab_1846	pos_1851	161.107	0.3085	1.0171	0.0187	0.0295	5.739	5.8191	5.8273	5.8568	5.7612	5.9484	5.6847	5.7574	5.7141	5.6857	5.7205	5.7968
metab_1847	pos_1852	453.297	0.7581	1.1192	0.0194	0.0305	5.8398	5.9584	5.3549	5.8558	5.7411	5.5538	5.0926	5.0859	5.5017	4.1773	5.3819	5.4092
metab_1848	pos_1853	504.306	0.0274	1.0067	0.8996	0.9165	5.5571	5.7584	4.9795	5.6401	5.7312	5.4615	4.6151	5.1313	6.1559	5.0296	6.0178	5.9558
metab_1849	pos_1854	445.368	1.1849	1.1944	0	0	6.2836	6.4644	6.0906	6.3313	6.109	6.6197	5.3327	5.5178	5.1952	5.1014	5.1354	5.4462
metab_1850	pos_1855	481.292	1.7323	1.4169	0	0	7.9562	7.6569	6.5713	7.6565	7.4214	7.4789	5.4091	5.2545	5.4282	5.0789	5.0469	5.3596
metab_1851	pos_1856	499.339	1.3089	1.2733	0.0008	0.002	6.8707	7.0026	6.1829	6.9056	6.6818	6.7531	4.6593	5.1921	6.0472	4.336	5.971	5.5225
metab_1852	pos_1857	479.313	1.7525	1.5413	0	0.0001	6.7944	6.9201	5.8446	6.8468	6.605	6.5038	4.2211	3.8154	5.3801	3.7091	4.1157	4.3981
metab_1853	pos_1858	547.36	0.8162	1.1077	0.0096	0.0165	6.5056	6.2605	7.2593	6.1504	6.5244	6.1063	5.5318	6.0747	5.9277	5.7936	6.073	5.6353
metab_1854	pos_1859	256.263	0.1142	1.0046	0.3962	0.4482	8.1634	8.0817	7.9959	8.0271	7.9973	8.0474	7.9208	8.0922	7.9084	8.0545	8.0615	8.0549
metab_1855	pos_1860	527.334	1.5785	1.5551	0.0015	0.0034	6.008	6.284	5.0356	6.1082	5.9452	5.8129	2.6464	5.405	4.4035	4.287	3.2433	2.6473
metab_1856	pos_1861	487.359	0.4514	1.027	0.0012	0.0027	6.5439	6.6247	6.4541	6.5741	6.4679	6.5585	6.2708	6.3876	6.3322	6.4655	6.4007	6.3317
metab_1857	pos_1862	609.27	1.0556	1.1508	0.0003	0.0009	7.465	6.9027	6.7669	6.8616	7.2845	6.3012	5.9984	6.1062	5.9552	5.9998	6.0722	5.9993
metab_1858	pos_1863	435.286	0.749	1.1391	0.0396	0.0575	5.5873	5.4896	4.462	5.6067	5.4338	5.4476	4.2063	5.5134	4.1475	4.8208	4.9477	4.4793
metab_1860	pos_1865	555.365	1.5232	1.3963	0.0001	0.0002	6.3011	6.2191	6.1997	6.2616	6.0751	6.0812	3.8757	4.6017	5.506	4.6968	3.9494	3.9659
metab_1861	pos_1866	533.323	0.9248	1.1456	0.0002	0.0007	5.5288	5.6383	5.2776	5.3247	5.0221	4.8885	4.5857	4.6934	4.5425	4.5871	4.6595	4.5866
metab_1862	pos_1867	423.325	2.1462	2.1731	0	0	6.0375	6.5351	5.7746	6.3115	6.1506	6.3235	4.3985	2.6175	2.4671	2.5115	2.5837	2.511
metab_1863	pos_1868	453.372	0.7928	1.1511	0.0238	0.0366	4.516	5.7784	4.4073	5.4321	5.112	5.4655	4.1801	4.7089	4.4679	4.7505	4.0654	4.5114
metab_1865	pos_1870	445.33	2.0776	2.3458	0.0009	0.0023	6.3278	6.6946	4.8479	6.5754	6.1851	6.6141	4.1011	4.7817	1.0436	1.0843	3.7827	1.0839
metab_1866	pos_1871	609.27	0.9964	1.1227	0.0002	0.0006	7.6743	7.4426	7.1373	7.1161	7.1766	6.6992	6.3964	6.5041	6.3532	6.3978	6.4702	6.3973
metab_1869	pos_1874	209.19	0.9043	1.1373	0	0.0002	5.1861	5.506	4.8479	5.2588	5.0556	5.1564	4.5462	4.5561	4.6113	4.5055	4.5079	4.5384
metab_1870	pos_1875	543.365	1.488	1.4013	0	0	5.6265	5.9408	5.0376	5.7443	5.4201	5.4806	3.9312	4.0389	3.888	3.9326	4.0049	3.932
metab_1871	pos_1876	170.154	0.4209	1.0291	0.0035	0.0068	5.7671	5.7371	5.6382	5.6701	5.5981	5.7107	5.4107	5.6413	5.4583	5.5585	5.5327	5.5572
metab_1872	pos_1877	493.328	1.3577	1.2735	0	0.0001	6.4478	6.7923	6.083	6.5107	6.1638	6.2507	4.9457	5.6977	5.0292	5.09	4.6721	4.5992
metab_1873	pos_1878	465.297	1.6007	1.5639	0.0003	0.0008	6.2557	6.3084	3.9434	6.3912	5.8223	5.9613	3.6721	3.7798	3.6289	3.6735	3.7458	3.673
metab_1874	pos_1879	476.409	0.8308	1.1783	0.0465	0.0663	5.35	5.9399	4.4334	5.4723	4.7395	4.9095	4.4678	5.3233	4.3462	4.6983	3.6102	3.7327
metab_1877	pos_1882	419.313	0.4932	0.8948	0.2784	0.3273	4.8847	5.2437	2.5987	5.0215	4.005	4.0172	4.3514	5.4291	4.9941	4.6509	5.0913	4.2835
metab_1878	pos_1883	483.381	0.3861	0.9607	0.1635	0.203	6.4019	6.8076	6.744	6.4054	6.5979	6.8903	6.8693	7.5967	7.0336	6.6848	6.8473	6.4432
metab_1879	pos_1884	593.275	2.0864	1.6945	0	0	7.7927	7.1633	7.5534	7.3741	7.8251	7.0445	4.3783	4.486	4.3351	4.3797	4.4521	4.3792
metab_1880	pos_1885	285.221	1.6569	1.5545	0	0	5.7677	6.1026	4.8042	6.0309	5.7357	5.5546	3.4137	4.2028	3.3706	3.8242	3.6413	3.4146
metab_1881	pos_1886	239.149	0.6251	1.0623	0.0003	0.0008	5.184	5.4767	5.1768	5.4291	5.2686	5.4029	4.9425	5.0413	5.0054	4.962	5.0293	5.0846
metab_1882	pos_1887	308.294	0.3633	1.0217	0.0134	0.0221	6.4623	6.3105	6.2946	6.3244	6.2015	6.2994	6.0838	6.223	6.1197	6.2166	6.2724	6.1723
metab_1883	pos_1888	421.329	0.2439	1.0198	0.3157	0.3662	6.3276	6.6909	6.3855	6.4717	6.3635	6.3427	6.3304	6.4883	5.9371	6.0419	6.5486	6.4824
metab_1884	pos_1889	555.365	1.8285	1.5635	0	0	6.8589	7.0324	6.0375	6.9683	6.5318	6.7566	3.9357	4.2693	4.4095	4.9101	4.0095	4.17
metab_1885	pos_1890	161.107	0.2525	1.0144	0.0653	0.0896	5.5375	5.6545	5.6511	5.692	5.6014	5.7866	5.5227	5.5904	5.5956	5.5285	5.5764	5.6325
metab_1886	pos_1891	144.982	0.3345	1.0158	0.0117	0.0197	6.9483	7.0647	7.0556	7.0843	7.022	7.1987	6.9343	6.9644	6.97	6.9093	6.9362	6.997
metab_1887	pos_1892	657.396	1.4538	0.7668	0	0.0001	5.4966	5.6783	4.8537	5.1946	5.4452	4.6623	6.4618	7.1227	6.4635	6.7859	7.2708	6.7554
metab_1888	pos_1893	984.682	1.7452	1.6458	0.0003	0.0008	5.8118	7.1663	4.6091	6.9379	5.7483	7.3086	3.6504	3.7581	3.6072	4.448	3.7241	3.6512
metab_1889	pos_1894	486.394	1.0686	1.2897	0.0156	0.0253	5.5379	5.7453	3.8052	5.5509	5.2612	4.8959	4.314	5.1673	3.5347	3.8186	3.5262	3.5207
metab_1891	pos_1896	226.18	0.2683	1.0179	0.0791	0.1063	5.4822	5.5318	5.5296	5.6639	5.5075	5.7383	5.3854	5.4462	5.4427	5.4869	5.5523	5.5564
metab_1893	pos_1898	467.42	0.924	1.2843	0.0522	0.0735	6.7389	4.0677	4.1608	5.6044	3.8852	4.0303	3.8778	3.6996	3.5487	3.6102	3.7382	3.7069
metab_1894	pos_1899	395.33	1.5639	1.4047	0	0	6.0605	6.3486	5.8522	6.1605	5.8634	6.0577	4.8586	4.1773	4.2454	4.3506	4.0542	4.1853
metab_1895	pos_1900	679.475	0.8071	1.0884	0.0015	0.0033	6.9516	7.0061	6.9331	6.6449	7.1629	6.4687	6.0683	6.4968	6.2409	6.3435	6.5227	6.1528
metab_1896	pos_1901	508.376	1.6043	1.5131	0	0.0001	5.644	5.5911	5.3998	5.6321	5.4925	5.8222	3.0677	4.5202	3.9581	3.5542	4.0254	3.0685
metab_1897	pos_1902	526.369	1.8453	1.712	0	0	5.7164	6.071	5.73	5.7272	5.7764	5.6751	3.3875	4.2486	3.4075	3.0501	3.1224	3.0496
metab_1898	pos_1903	399.324	1.2492	1.2936	0.0001	0.0004	5.8842	5.5377	4.7519	5.552	5.1249	5.4268	4.1799	4.7255	3.9568	4.1745	3.9042	4.0156
metab_1901	pos_1906	493.329	1.3951	1.2775	0	0.0001	6.8157	7.09	6.0851	6.9019	6.5886	6.572	5.002	5.7441	5.191	5.4313	5.0853	4.9001
metab_1903	pos_1908	560.371	1.2121	1.2757	0.0002	0.0007	5.5393	6.0533	4.5246	5.7235	5.4334	5.4644	4.2533	4.361	4.2101	4.2547	4.3271	4.2542
metab_1904	pos_1909	593.275	0.942	1.1241	0.0005	0.0014	7.0746	6.3812	6.715	6.612	7.1015	6.2265	5.9238	6.0315	5.8806	5.9252	5.9975	5.9247
metab_1905	pos_1910	551.392	1.5999	1.4929	0	0	5.4371	6.0944	5.242	5.599	5.9982	5.5241	3.5211	4.321	3.3986	3.708	3.9184	3.8369
metab_1906	pos_1911	531.365	1.2153	1.2022	0	0.0002	6.9922	6.6236	6.5142	6.6706	6.3013	6.3818	5.1863	5.8805	5.5744	5.2426	5.73	5.2273
metab_1907	pos_1912	550.409	1.2203	1.2401	0.0001	0.0004	6.3493	6.0126	6.0174	6.0472	5.7306	5.7665	4.5566	5.016	4.5053	5.5772	4.6828	4.6285
metab_1908	pos_1913	249.185	1.1971	1.2369	0	0	5.2287	5.3885	5.1798	5.4554	5.0842	5.1799	4.2332	4.2741	4.148	4.2835	4.3041	4.241
metab_1909	pos_1914	613.481	0.5275	1.0527	0.0696	0.0946	6.7176	6.8138	6.9299	6.5256	6.6425	6.5108	6.0195	7.0728	6.1742	6.233	6.3249	6.3079
metab_1911	pos_1916	520.435	1.2941	1.2332	0.0002	0.0006	7.2044	7.3858	6.2175	7.1998	6.5449	7.1426	5.3943	6.2511	5.6704	5.5504	5.4663	5.4763
metab_1912	pos_1917	431.313	1.6457	1.5222	0	0.0002	6.0115	6.3877	5.4145	6.0362	5.7403	5.9674	4.1083	4.3998	3.3434	4.2089	4.4074	2.8925
metab_1913	pos_1918	393.314	1.55	1.3825	0	0	6.2498	6.4858	5.7224	6.4008	5.9699	6.151	4.4346	4.5424	4.3915	4.436	4.5084	4.4355
metab_1915	pos_1920	712.535	1.4325	1.4002	0.0003	0.0009	5.9901	6.1289	4.7779	6.0376	5.9591	5.9136	3.3954	5.0412	4.2223	3.6952	4.2967	4.2073
metab_1916	pos_1921	685.467	0.9756	1.1417	0.0014	0.0032	6.5337	6.3374	6.7514	6.3132	6.1691	5.933	5.1997	6.1363	5.3853	5.5426	5.7322	5.3232
metab_1918	pos_1923	455.351	1.1939	1.2031	0.0001	0.0003	6.6365	6.8907	5.9797	6.6769	6.3071	6.3968	5.2749	5.8987	5.2637	5.5288	5.2269	5.128
metab_1919	pos_1924	449.303	1.1622	1.2693	0.0003	0.0008	5.3775	5.6845	4.299	5.3706	4.9287	5.1888	4.0277	4.1354	3.9845	4.0291	4.1014	4.0286
metab_1920	pos_1925	363.325	1.6361	1.5941	0	0.0002	5.6945	5.9108	4.9131	5.8036	5.5139	5.1835	3.6831	3.5201	2.3934	3.9927	4.0597	3.0627
metab_1921	pos_1926	505.326	0.4808	0.9096	0.2808	0.3298	6.1547	4.6639	4.6409	5.1043	4.2815	3.3349	5.3531	5.303	4.5717	5.3704	4.8315	5.5526
metab_1922	pos_1927	441.372	0.1025	0.9894	0.6441	0.6859	6.7001	6.9138	6.771	6.6759	6.6635	6.6873	6.6653	7.535	6.6334	6.6706	6.7278	6.6124
metab_1923	pos_1928	295.226	0.3902	1.0407	0.1109	0.1438	6.142	5.6773	5.425	5.6657	5.4684	5.4978	5.2805	5.7082	5.324	5.5161	5.3436	5.3792
metab_1924	pos_1929	758.501	0.9511	1.2628	0.0449	0.0644	4.3497	4.4782	4.292	6.1599	4.5915	6.9725	4.0207	4.1284	3.9775	4.0221	4.2574	4.0215
metab_1925	pos_1930	661.464	2.068	2.1124	0	0.0001	6.1933	6.2588	6.1108	5.8236	6.3632	5.5722	2.2267	4.4474	2.1838	2.2281	3.8839	2.2276
metab_1926	pos_1931	445.367	1.0523	1.1598	0.0001	0.0004	5.9695	6.4223	6.3288	6.3011	5.9502	6.8309	5.5457	5.1911	5.4542	5.538	5.3608	5.5036
metab_1927	pos_1932	479.35	0.498	1.0562	0.1359	0.172	6.8343	7.0863	6.2016	6.852	6.5677	6.5166	6.0587	7.1808	6.027	6.2978	6.2796	6.082
metab_1928	pos_1933	212.201	0.4176	1.0321	0.0119	0.02	5.4338	5.5047	5.2991	5.4654	5.2908	5.4424	5.1844	5.4163	5.1453	5.2342	5.2802	5.1677
metab_1929	pos_1934	284.294	0.5013	1.0279	0.0012	0.0027	8.0236	7.996	7.8757	7.9227	7.7692	7.8847	7.5959	7.7432	7.619	7.7205	7.7304	7.7754
metab_1931	pos_1936	409.31	1.1914	1.2259	0.0005	0.0013	6.2617	6.8377	5.5133	6.5127	5.9303	6.2609	4.8822	5.6793	4.8508	5.0933	5.0619	4.8708
metab_1932	pos_1937	663.478	0.8943	1.0997	0.0002	0.0006	6.5618	6.8536	6.7945	6.6974	6.7453	6.6382	6.1878	6.4043	6.2493	6.0137	6.0729	5.711
metab_1934	pos_1939	615.459	0.1232	0.9901	0.6938	0.7314	6.621	6.0983	5.8928	6.1676	6.4369	6.1254	6.1803	6.3838	5.8666	6.5543	6.5644	6.1646
metab_1936	pos_1941	611.427	1.2953	1.2819	0.0009	0.0023	7.2573	6.4575	6.0177	6.3978	5.933	5.7457	4.69	5.354	5.489	4.8729	4.9784	4.1128
metab_1938	pos_1943	535.339	1.2222	1.3007	0.0029	0.0058	5.892	6.2127	5.2026	5.8562	5.8498	5.6312	4.6889	5.3279	3.4405	4.7676	3.5574	4.8543
metab_1939	pos_1944	591.386	1.6744	1.4806	0	0.0001	6.4319	6.5735	6.3399	6.0858	6.5944	6.2176	5.07	4.7675	3.5672	4.4918	4.1484	3.7878
metab_1940	pos_1945	336.325	0.2816	1.0201	0.1403	0.1768	6.2058	6.3596	6.1858	6.4411	6.2987	6.5385	6.0988	6.1475	6.1689	6.4777	6.1959	6.1885
metab_1945	pos_1950	411.325	1.9864	1.6451	0	0	7.4728	7.6603	6.5702	7.6451	7.1234	7.4444	5.0195	3.7936	4.1424	4.9524	4.6073	4.1767
metab_1946	pos_1951	364.357	0.535	1.0662	0.1054	0.1375	6.5042	6.8428	6.3244	6.7165	6.5009	6.857	7.1701	5.9708	5.6332	5.9792	6.2861	6.2386
metab_1947	pos_1952	607.291	2.0518	1.8049	0	0	6.3748	5.8817	7.6351	6.5867	7.0309	6.9611	3.7138	3.8215	3.6706	3.7152	3.7876	3.7147
metab_1948	pos_1953	475.377	1.9502	2.0112	0	0.0002	5.9944	6.3893	4.3004	6.1568	5.7161	5.8235	2.5021	4.2067	2.4591	2.5035	2.9174	2.503
metab_1949	pos_1954	375.304	1.8143	1.7361	0	0	5.7907	6.0188	4.7038	5.9274	5.5072	5.6027	3.1974	3.3051	3.1543	3.1988	3.2711	3.1983
metab_1950	pos_1955	507.365	1.3202	1.2224	0	0	6.771	7.0763	7.1201	6.7331	6.8868	6.7419	5.4035	6.0536	5.5195	5.4493	5.8832	5.5019
metab_1951	pos_1956	852.615	1.1896	1.2187	0.0009	0.0022	6.7368	7.0851	5.924	6.7583	6.6905	6.2926	4.6717	6.0113	5.4694	5.7802	5.3061	5.1586
metab_1952	pos_1957	287.2	1.1698	1.2112	0	0.0001	5.7732	6.1714	5.6493	5.9954	5.8789	6.1857	4.6754	4.7377	4.7318	5.1768	4.9533	5.1635
metab_1954	pos_1959	555.44	0.5012	1.1184	0.2227	0.2677	4.7102	5.5992	3.7236	5.2371	5.4863	4.8795	4.2551	3.56	3.6476	4.7728	5.1878	5.0722
metab_1955	pos_1960	533.381	1.6991	1.4472	0	0	6.5704	7.1609	6.7132	6.6828	6.9501	6.7612	4.0825	4.96	4.6276	5.1138	5.3099	4.1244
metab_1956	pos_1961	764.527	1.1646	1.3689	0.0142	0.0233	6.5278	5.7457	3.9751	6.0506	4.3075	4.0065	3.7038	3.8115	3.6606	3.7052	3.7776	3.7047
metab_1957	pos_1962	483.344	1.6555	1.4641	0	0	6.0932	6.1842	5.9179	6.1505	5.6967	6.375	4.1103	4.2933	4.0671	4.1117	4.184	4.1111
metab_1959	pos_1964	850.6	1.1248	1.2296	0.0017	0.0036	6.1967	6.5419	5.0301	6.2598	6.1005	5.1536	4.7588	4.8665	4.7156	4.7601	4.8325	4.7596
metab_1960	pos_1965	590.475	1.0399	1.1968	0.0016	0.0035	6.0382	6.1035	5.2803	6.0764	6.1376	6.1944	4.6517	4.431	5.269	5.0018	4.9136	5.6741
metab_1961	pos_1966	341.283	0.9273	0.8087	0.0252	0.0385	4.4735	4.8425	3.4395	3.7463	4.2244	3.4709	4.5093	6.2861	4.5792	5.0405	4.9977	4.5093
metab_1964	pos_1969	525.391	0.994	0.7327	0.0469	0.0668	4.7342	2.9835	2.8933	3.8485	2.9153	2.9388	4.2663	6.7471	4.8097	3.7794	4.2066	3.9168
metab_1966	pos_1971	481.366	0.4464	1.0427	0.1134	0.1467	6.6563	6.8807	6.2196	6.6905	6.4637	6.4703	6.0252	6.8561	6.356	6.3078	6.1449	6.0716
metab_1967	pos_1972	97.0763	0.2496	1.013	0.0895	0.1188	6.4071	6.4792	6.5095	6.5145	6.4004	6.6138	6.3277	6.4351	6.3932	6.3076	6.4558	6.5016
metab_1968	pos_1973	108.068	0.1983	1.0202	0.2702	0.3183	4.3708	4.1627	4.3547	4.1576	4.3106	4.3947	3.9516	4.1907	4.3803	4.2348	4.2875	4.1966
metab_1969	pos_1974	163.098	0.312	1.0188	0.0453	0.0649	6.2063	6.2669	6.2641	6.3448	6.1846	6.4334	6.0776	6.1516	6.2009	6.0673	6.2368	6.2695
metab_1970	pos_1975	134.071	0.2278	1.0145	0.1712	0.2115	5.7882	5.8394	5.9063	5.9255	5.7449	6.0312	5.6789	5.8236	5.8157	5.6726	5.8664	5.8795
metab_1971	pos_1976	107.061	0.3278	1.0199	0.0277	0.0419	5.9146	5.9844	6.0263	6.0609	5.9226	6.1275	5.8291	5.9069	5.8785	5.7842	5.9531	5.983
metab_1972	pos_1977	512.431	1.3321	1.243	0	0.0001	6.4731	7.125	6.1878	6.9592	6.6723	7.1591	5.3995	5.4833	5.4243	5.4324	5.4262	5.4818
metab_1973	pos_1978	590.474	1.6018	1.5048	0	0.0002	5.8995	6.0747	5.2336	5.874	5.9518	5.8808	3.9689	4.5294	2.8832	4.2696	4.1946	3.358
metab_1974	pos_1979	651.458	0.2505	1.0299	0.4677	0.5195	6.3905	5.8664	6.5923	5.9043	6.3972	5.6207	5.4176	6.6196	5.6221	6.2133	5.8464	5.9889
metab_1976	pos_1981	511.375	1.6206	1.5499	0	0.0001	5.5362	6.1505	4.4158	5.9825	5.7417	5.6923	3.5203	3.9923	3.4771	3.5216	3.594	3.5211
metab_1977	pos_1982	427.356	1.3876	1.2451	0	0.0001	7.4604	7.6257	6.6653	7.4392	7.0905	7.0908	5.9137	6.188	5.5445	5.763	5.8624	5.5616
metab_1978	pos_1983	441.372	0.9151	1.1129	0.0011	0.0026	7.0036	7.1659	6.4297	7.0033	6.6198	6.6995	6.0633	6.6003	6.1532	6.0935	5.96	5.8977
metab_1979	pos_1984	574.467	1.821	1.6097	0	0	5.8714	6.2655	5.8848	6.4358	6.0571	6.9318	3.6804	4.0306	4.1316	3.6818	4.0534	3.6813
metab_1981	pos_1986	537.355	2.3936	2.7045	0	0	6.6327	6.9676	5.6384	6.8057	6.2841	6.553	2.9141	3.649	2.0705	1.8905	1.962	1.89
metab_1983	pos_1988	597.448	0.433	1.0431	0.0799	0.1072	6.3826	6.5579	6.1286	6.5626	6.5511	6.848	6.2254	6.0673	5.9888	6.0716	6.5569	6.5036
metab_1984	pos_1989	754.543	0.1521	0.9681	0.6673	0.7072	4.9126	5.1832	7.1482	4.7709	5.2392	4.767	5.7818	5.6764	5.5743	5.5614	5.6796	4.8072
metab_1985	pos_1990	429.372	0.8303	1.099	0.0063	0.0114	7.3204	7.5241	6.8536	7.4143	7.1032	7.0858	6.5867	6.9973	6.0025	6.2366	6.6284	6.9481
metab_1986	pos_1991	411.361	1.2191	1.2006	0.0001	0.0003	6.9695	7.1892	6.2543	7.0327	6.6538	6.8008	5.7252	6.1195	5.4688	5.3881	5.8462	5.522
metab_1987	pos_1992	161.107	0.4656	1.0284	0.0002	0.0007	6.1192	6.1988	6.1977	6.2215	6.1562	6.3144	6.0036	6.0648	6.0111	5.9879	6.0456	6.0669
metab_1988	pos_1993	122.096	0.4084	1.0166	0.0009	0.0022	8.4578	8.5352	8.5284	8.5624	8.4848	8.6437	8.3667	8.4308	8.3832	8.3561	8.4003	8.4412
metab_1989	pos_1994	371.162	0.7341	1.0872	0.0032	0.0064	5.7941	6.2165	5.9183	6.3068	6.0402	6.0781	5.5489	5.4986	5.1339	5.7984	5.732	5.7291
metab_1990	pos_1995	425.341	1.2773	1.2366	0.0012	0.0027	7.3168	7.5417	6.3877	7.3333	6.809	6.9184	6.1104	6.3763	5.3081	5.6764	6.0042	4.7341
metab_1991	pos_1996	226.951	0.025	0.9992	0.8493	0.8729	7.0475	7.0003	7.0097	7.0883	7.0145	7.1814	7.0497	7.0968	7.0674	7.0257	7.049	7.0886
metab_1993	pos_1998	294.938	0.1858	1.0117	0.2118	0.2559	5.7977	5.6809	5.6079	5.7673	5.8321	5.9424	5.7041	5.7459	5.7539	5.6424	5.6753	5.6999
metab_1994	pos_1999	240.232	0.636	1.0603	0.0003	0.0008	5.5885	5.6804	5.5103	5.854	5.4949	5.7363	5.3263	5.3429	5.2546	5.3037	5.374	5.3363
metab_1998	pos_2003	425.377	0.0028	0.9972	0.9363	0.9469	5.4892	5.955	5.7596	5.9482	5.2563	6.0949	5.7419	6.376	5.8541	5.7206	5.2921	5.6145
metab_2001	pos_2006	146.98	0.5146	1.0276	0	0.0002	7.3984	7.4865	7.4669	7.4963	7.4403	7.5831	7.261	7.3248	7.2666	7.2342	7.271	7.3111
metab_2003	pos_2008	226.012	0.5401	1.0333	0.0001	0.0003	6.895	7.0267	6.9255	7.0076	6.9619	7.0981	6.7299	6.8156	6.7783	6.7209	6.7192	6.802
metab_2004	pos_2009	91.0062	0.2699	1.0171	0.0558	0.078	5.4617	5.5401	5.4267	5.4514	5.4281	5.5907	5.3252	5.4599	5.3295	5.3099	5.4173	5.5018
metab_2005	pos_2010	131.533	0.5517	1.0321	0	0.0002	7.3546	7.482	7.3843	7.4559	7.3908	7.538	7.1694	7.2568	7.2213	7.1575	7.1737	7.242
metab_2006	pos_2011	151.035	0.5579	1.0365	0	0.0002	6.5942	6.7362	6.6217	6.7005	6.6332	6.784	6.4207	6.4911	6.474	6.3914	6.4147	6.4632
metab_2007	pos_2012	280.993	0.5689	1.0413	0.0001	0.0003	6.2663	6.3395	6.2061	6.3041	6.2506	6.4222	6.0077	6.1212	6.127	6.0062	6.0008	6.0269
metab_2008	pos_2013	207.017	0.5473	1.0363	0.0001	0.0003	6.5196	6.6539	6.5563	6.6098	6.5395	6.7161	6.3187	6.4392	6.3963	6.3149	6.3425	6.3972
metab_2009	pos_2014	314.943	0.636	1.0468	0	0.0001	6.6691	6.7604	6.6401	6.7254	6.6722	6.834	6.4439	6.4937	6.4549	6.3498	6.3637	6.3985
metab_2010	pos_2015	92.5226	0.577	1.0538	0.0001	0.0004	4.9134	5.0448	5.0377	5.0231	4.9924	4.9841	4.7998	4.7806	4.61	4.6661	4.8448	4.7613
metab_2011	pos_2016	132.035	0.5597	1.0387	0	0.0001	6.2975	6.4063	6.3252	6.3763	6.3112	6.4728	6.0936	6.1726	6.1491	6.0918	6.0832	6.179
metab_2012	pos_2017	139.018	0.549	1.0319	0	0.0001	7.2501	7.3668	7.2708	7.3443	7.2625	7.4053	7.0552	7.1369	7.082	7.0488	7.0878	7.1326
metab_2013	pos_2018	167.013	0.5766	1.0324	0	0.0001	7.7385	7.8485	7.7653	7.8321	7.7383	7.8939	7.5296	7.5998	7.5592	7.5205	7.5469	7.5896
metab_2014	pos_2019	255.944	0.6171	1.0438	0	0.0001	6.6406	6.7465	6.632	6.7036	6.638	6.7997	6.4157	6.4748	6.4535	6.3701	6.3532	6.4076
metab_2015	pos_2020	316.938	0.6448	1.0521	0	0.0001	6.1692	6.268	6.1543	6.2457	6.1581	6.3192	5.9211	5.9996	5.925	5.8368	5.8367	5.9478
metab_2016	pos_2021	120.044	0.5732	1.0448	0	0.0001	5.7056	5.8819	5.7493	5.7862	5.7464	5.8633	5.4863	5.5872	5.555	5.487	5.5386	5.5918
metab_2017	pos_2022	180.044	0.5242	1.0372	0	0.0001	5.6986	5.802	5.6877	5.7683	5.7155	5.8237	5.5182	5.5789	5.5287	5.5188	5.52	5.5913
metab_2019	pos_2024	165.983	0.5915	1.0431	0	0.0001	6.2275	6.337	6.2803	6.2958	6.2241	6.4103	6.039	6.1106	6.0043	5.9855	6.0463	6.0325
metab_2020	pos_2025	195.993	0.5315	1.0305	0	0.0002	7.1659	7.2797	7.1864	7.2498	7.1693	7.3101	6.9961	7.0687	6.9863	6.9535	7.01	7.0607
metab_2022	pos_2027	205.017	0.6132	1.0501	0	0.0001	5.7619	5.8858	5.8024	5.8506	5.8042	5.9504	5.5703	5.6519	5.5744	5.506	5.5124	5.5717
metab_2024	pos_2029	180.022	0.6034	1.0488	0	0	5.6468	5.744	5.6829	5.7753	5.6426	5.8099	5.4622	5.4976	5.4443	5.4011	5.4364	5.4617
metab_2025	pos_2030	412.365	1.0202	1.2285	0.0015	0.0033	4.0646	5.1242	4.862	4.7789	4.0288	5.0109	3.7356	3.8433	3.6924	3.7369	3.9431	3.7364
metab_2026	pos_2031	178.99	0.597	1.0437	0	0.0001	6.2188	6.3137	6.2389	6.3195	6.2209	6.3822	5.9939	6.0823	6.0053	5.9627	6.0083	6.0588
metab_2027	pos_2032	320.885	0.7312	1.0844	0	0.0002	5.0115	5.1492	5.1973	5.0472	4.9777	5.2133	4.7539	4.7982	4.7984	4.6626	4.5673	4.6297
metab_2028	pos_2033	172.956	0.5714	1.0385	0	0.0001	6.5749	6.6921	6.5988	6.6812	6.5472	6.7401	6.3762	6.4499	6.3734	6.3545	6.3757	6.4303
metab_2029	pos_2034	266.938	0.5715	1.0413	0.0001	0.0002	6.2034	6.3574	6.2387	6.317	6.1819	6.3871	6.0036	6.0807	6.0224	5.9994	6.0163	6.071
metab_2030	pos_2035	199.976	0.5744	1.042	0.0001	0.0004	6.3065	6.4631	6.3027	6.4289	6.2658	6.4927	6.0901	6.1761	6.0919	6.0865	6.1138	6.1624
metab_2031	pos_2036	282.91	0.6206	1.0431	0	0	6.7346	6.8369	6.7778	6.8511	6.7224	6.8954	6.5156	6.5796	6.5172	6.4764	6.498	6.547
metab_2032	pos_2037	225.029	0.6111	1.0467	0	0	6.0351	6.1422	6.0234	6.133	6.0421	6.1752	5.7984	5.8614	5.827	5.793	5.8015	5.8371
metab_2033	pos_2038	199.988	0.6198	1.0382	0	0	7.5416	7.6767	7.5629	7.638	7.5449	7.696	7.3217	7.3834	7.3282	7.2847	7.3183	7.3436
metab_2034	pos_2039	182.985	0.5933	1.0328	0	0	8.045	8.1674	8.0812	8.1444	8.0537	8.1974	7.8413	7.9068	7.8431	7.8106	7.858	7.8838
metab_2035	pos_2040	217.979	0.5271	1.0404	0.0001	0.0003	5.4611	5.5767	5.4571	5.5753	5.4328	5.5927	5.2928	5.3054	5.2798	5.268	5.3026	5.364
metab_2036	pos_2041	152.995	0.5786	1.0369	0	0.0001	6.8655	6.996	6.9001	6.9627	6.8804	7.0225	6.6739	6.7455	6.6784	6.6443	6.6801	6.7217
metab_2038	pos_2043	158.961	0.5975	1.0347	0	0	7.7111	7.8431	7.7409	7.8097	7.719	7.8707	7.5073	7.5781	7.511	7.4791	7.5159	7.5328
metab_2039	pos_2044	169.977	0.5586	1.0333	0.0001	0.0002	7.2428	7.3933	7.3163	7.3352	7.2531	7.4278	7.0758	7.1684	7.0498	7.0445	7.0997	7.1117
metab_2040	pos_2045	273.954	0.6199	1.0741	0.0122	0.0204	5.3722	5.4737	5.3362	5.2312	5.3642	5.5841	5.1811	5.1389	5.2021	5.0087	5.1187	4.4844
metab_2041	pos_2046	125.986	0.5837	1.039	0	0.0001	6.6806	6.7882	6.702	6.7431	6.6916	6.8416	6.4728	6.5547	6.4908	6.4299	6.4559	6.524
metab_2042	pos_2047	124.544	0.572	1.047	0	0.0002	5.3877	5.5193	5.4653	5.4713	5.4011	5.5314	5.203	5.3354	5.217	5.1422	5.1927	5.2198
metab_2043	pos_2048	142.991	0.5425	1.0365	0.0001	0.0003	6.3214	6.4755	6.3581	6.442	6.3942	6.5313	6.1744	6.2451	6.2154	6.1385	6.1749	6.2162
metab_2044	pos_2049	186.981	0.5433	1.0321	0.0001	0.0003	7.2045	7.3482	7.2427	7.3125	7.2658	7.4078	7.0395	7.1276	7.0895	7.0304	7.03	7.1047
metab_2045	pos_2050	199.001	0.087	1.0082	0.6776	0.7167	4.7107	4.7465	4.9167	5.084	4.8249	5.2031	4.892	4.8744	4.8385	4.7796	4.7673	5.0948
metab_2046	pos_2051	140.995	0.5488	1.0346	0	0.0002	6.7634	6.896	6.8063	6.8602	6.8152	6.961	6.5898	6.6731	6.6363	6.58	6.592	6.6575
metab_2048	pos_2053	168.994	0.3779	1.0344	0.0511	0.0721	5.0614	5.0762	4.9486	5.1619	4.8447	5.2565	4.912	5.0264	4.9314	4.702	4.8165	4.9507
metab_2050	pos_2055	754.543	0.2523	1.0358	0.6325	0.675	5.2386	5.2441	7.5612	5.5173	5.3029	5.6494	5.8679	5.8289	5.78	5.4546	5.5924	4.7972
metab_2052	pos_2057	537.354	1.7436	1.5468	0	0	6.3964	6.6791	5.5931	6.6222	6.251	6.4267	4.3034	4.2192	3.6458	4.8481	3.7628	3.7691
metab_2053	pos_2058	405.351	1.24	1.2687	0.001	0.0023	6.0232	6.3484	5.5786	6.0339	5.9128	5.767	4.7787	5.7946	4.086	4.3895	4.8068	4.2549
metab_2054	pos_2059	180.034	0.5853	1.041	0	0	6.2894	6.3995	6.3068	6.3911	6.2901	6.4282	6.0793	6.1436	6.0909	6.0726	6.0987	6.1208
metab_2056	pos_2061	121.089	0.4421	1.0258	0.0004	0.001	6.1649	6.2477	6.2127	6.2495	6.1858	6.3372	6.0209	6.1184	6.0857	6.0344	6.0978	6.1
metab_2057	pos_2062	645.469	1.2934	1.2307	0.0001	0.0003	6.5962	7.1242	6.7932	6.7422	6.8453	6.6088	5.532	5.3658	5.7921	5.3375	6.1742	4.8761
metab_2058	pos_2063	395.33	2.0288	1.836	0	0	6.5323	6.8408	5.7386	6.8015	6.3289	6.5253	4.0975	3.2967	3.9995	3.1904	3.3388	3.1899
metab_2059	pos_2064	111.092	0.2469	1.0128	0.0853	0.1138	6.3541	6.4444	6.4318	6.4497	6.3209	6.5437	6.274	6.3762	6.3328	6.2583	6.387	6.4311
metab_2060	pos_2065	590.513	1.6505	1.7491	0.0019	0.0041	6.238	6.2325	3.361	6.3921	5.6867	5.6274	2.4206	4.0834	4.1327	2.422	2.5561	3.5603
metab_2061	pos_2066	102.971	0.601	1.0439	0	0	6.1775	6.3009	6.2149	6.2876	6.1876	6.3356	5.9778	6.0341	5.9627	5.9628	5.9988	5.9907
metab_2062	pos_2067	647.449	1.9013	1.8119	0.0004	0.001	6.5339	6.9377	6.4616	6.3156	6.831	5.9778	2.5656	5.0487	1.634	3.7031	4.8161	3.7925
metab_2064	pos_2069	407.33	1.2815	1.2322	0	0	6.4393	6.5202	6.3624	6.3696	5.9698	6.0696	5.2277	5.1107	4.7813	5.2674	5.0848	5.1543
metab_2065	pos_2070	643.453	1.7259	1.4555	0	0	6.7115	6.9096	7.1286	6.5806	7.0181	6.8091	5.2088	5.1595	5.0989	4.3641	4.0316	4.415
metab_2066	pos_2071	663.479	0.9457	1.1454	0.0026	0.0053	6.1578	6.8364	6.454	6.08	6.7054	6.0489	5.3945	5.3413	5.0837	5.6412	6.06	5.8997
metab_2067	pos_2072	959.569	1.3518	0.8032	0.0001	0.0002	5.5881	5.6207	6.8102	5.6266	5.6306	5.5618	7.2592	6.8247	7.2739	7.3455	7.3331	7.3387
metab_2068	pos_2073	439.356	0.999	1.1299	0.0012	0.0028	7.3153	7.5906	6.7819	7.3711	7.0172	7.0847	6.2842	7.0499	6.1718	6.4027	6.1986	6.0898
metab_2069	pos_2074	565.247	0.632	0.8963	0.1035	0.1352	4.3189	3.9048	5.7833	5.4777	4.983	5.8292	5.5423	5.6392	5.6529	5.692	5.6504	5.6262
metab_2070	pos_2075	379.32	1.358	0.7803	0	0	5.0883	4.9464	4.3425	4.4843	4.7654	4.6709	6.1469	6.2643	6.0429	5.8833	5.9476	5.977
metab_2071	pos_2076	173.096	1.1607	1.2531	0.0001	0.0005	5.431	5.6486	4.5192	5.6159	5.0923	5.4197	4.2322	4.2337	4.268	4.0064	4.2892	4.2925
metab_2073	pos_2078	521.359	0.2232	1.0257	0.5724	0.6196	6.068	6.2739	5.8315	6.0847	6.002	5.9308	5.692	7.0442	5.8404	5.2398	5.8702	5.6014
metab_2074	pos_2079	537.355	1.7114	1.544	0.0001	0.0003	6.5026	6.8307	5.6689	6.6032	6.2862	6.3855	3.6404	5.4354	3.5972	4.7652	3.7141	3.6413
metab_2075	pos_2080	226.216	0.4524	1.0367	0.005	0.0093	5.3517	5.3661	5.2714	5.3321	5.222	5.4685	5.0225	5.2985	5.0643	5.1395	5.1508	5.1989
metab_2078	pos_2083	276.232	0.2519	1.0364	0.4922	0.543	5.4532	5.814	4.4507	5.3293	5.4992	5.0216	5.2614	5.765	4.8974	4.89	5.1378	4.5057
metab_2079	pos_2084	254.247	0.358	1.0205	0.0072	0.0128	6.0741	6.0377	5.9642	6.0458	5.8922	6.072	5.8282	5.9454	5.8402	5.8917	5.9532	5.8968
metab_2080	pos_2085	411.361	1.0571	1.1482	0.0001	0.0003	6.1913	6.6763	6.4225	6.6635	6.6911	6.875	5.947	6.0367	5.5622	5.728	5.5643	5.5851
metab_2082	pos_2087	611.427	0.9911	1.2025	0.0246	0.0377	7.1138	6.1407	5.466	6.3328	5.8267	5.6427	5.368	5.7843	5.7217	5.022	4.6475	3.8287
metab_2083	pos_2088	477.334	1.2136	1.2748	0.0022	0.0046	6.1665	6.4745	4.8477	6.2522	5.8898	5.7518	4.6683	5.4941	4.4655	4.7467	4.3859	3.9957
metab_2085	pos_2090	537.355	1.4062	1.358	0	0.0001	5.9647	6.133	4.8473	5.9901	5.4836	5.6468	4.1046	4.5286	4.0614	4.106	4.1783	4.1054
metab_2088	pos_2093	613.443	0.0412	0.9982	0.9309	0.9426	7.2515	6.608	6.4502	6.6866	6.7608	6.5546	6.6527	6.6943	6.4697	6.8886	6.9408	6.7373
metab_2089	pos_2094	406.329	0.3221	1.0169	0.0239	0.0367	6.7433	6.9177	6.685	6.8789	6.7428	6.8782	6.7428	6.6604	6.6635	6.6648	6.6884	6.7491
metab_2090	pos_2095	467.313	1.0464	1.1936	0.0049	0.0092	6.5295	6.7009	5.4567	6.6394	6.3126	6.4583	5.362	5.0783	5.7735	4.4089	5.8715	5.4259
metab_2091	pos_2096	453.334	1.4741	1.2953	0	0.0001	7.2179	7.4276	6.4134	7.3043	6.7767	7.0502	5.4373	5.9262	5.17	5.5624	5.3198	5.1587
metab_2093	pos_2098	539.37	1.7105	1.4755	0	0.0001	6.9905	6.9991	6.0592	6.991	6.5198	6.7654	4.7541	5.2358	3.8564	4.8987	4.6436	3.9408
metab_2098	pos_2103	576.425	2.0094	1.9956	0	0	5.9111	6.3577	4.9254	6.1171	5.8329	5.9474	3.0441	2.6855	3.698	2.9267	2.6516	2.5789
metab_2099	pos_2104	551.334	1.5925	1.4798	0	0	5.9096	6.1141	4.8346	6.0116	5.8211	5.8215	3.8636	3.9713	3.8204	3.865	3.9374	3.8645
metab_2101	pos_2106	465.334	1.3617	1.2381	0	0.0001	7.1748	7.3822	6.7971	7.2971	6.8849	7.2973	5.9865	6.3444	5.4174	5.6667	5.8561	5.3221
metab_2102	pos_2107	458.33	1.5182	1.5203	0.0004	0.001	5.6792	5.8355	4.8367	5.753	5.4209	5.432	3.472	3.5514	4.4651	2.2485	3.6139	4.3301
metab_2103	pos_2108	227.127	1.3836	1.3091	0	0	5.5203	6.0864	6.0987	5.6745	6.01	5.7802	4.1052	4.4571	4.6514	4.5284	4.7756	4.3534
metab_2104	pos_2109	553.35	1.4064	1.2931	0	0.0001	6.5115	6.7594	5.8829	6.6552	6.4147	6.3956	4.7924	5.4955	4.9916	5.1315	4.9094	4.5492
metab_2108	pos_2113	439.319	1.3512	1.2615	0	0	6.5224	6.7495	5.9464	6.5911	6.3165	6.4289	5.2166	5.3626	4.8529	5.2477	4.9602	4.9224
metab_2109	pos_2114	477.334	0.5817	1.0776	0.0948	0.1252	6.4475	6.5684	5.616	6.3595	5.972	6.0161	5.5653	6.5705	5.278	5.8425	5.715	5.3399
metab_2110	pos_2115	571.435	0.6939	1.1107	0.0364	0.0533	5.5985	5.8945	5.3084	5.1874	5.5918	5.0544	4.1376	5.5458	4.9234	5.0083	4.9706	4.7976
metab_2111	pos_2116	577.369	1.431	1.3755	0.0006	0.0016	6.1694	6.231	6.0701	5.7312	6.1943	5.7618	3.644	5.6973	4.8134	4.0276	4.4581	3.6449
metab_2112	pos_2117	497.361	0.9083	1.1022	0.0004	0.0011	7.2451	7.428	6.8445	7.3179	7.0723	7.1882	6.4118	6.847	6.2835	6.7787	6.3246	6.4556
metab_2113	pos_2118	615.459	0.0496	0.9955	0.8528	0.8759	6.2902	6.1695	5.91	6.3075	6.1758	6.4419	6.3021	6.5999	5.7114	6.267	6.4773	6.1055
metab_2114	pos_2119	520.435	0.5737	1.0783	0.1021	0.1338	6.7131	6.6686	5.3996	6.5165	6.0199	6.4469	5.6332	6.5763	5.7456	5.7597	5.6791	5.6285
metab_2115	pos_2120	425.341	1.1929	1.1868	0.0001	0.0003	6.935	7.264	6.4392	7.086	6.7332	6.9718	5.9494	6.3347	5.5751	5.7648	5.8366	5.4497
metab_2116	pos_2121	621.27	1.4026	1.4021	0.0017	0.0037	5.5579	4.9688	7.1606	5.7303	5.4913	6.3623	3.6644	3.7721	4.904	3.6658	4.891	4.2629
metab_2117	pos_2122	429.336	1.5397	1.3597	0	0.0001	6.896	6.9959	5.8787	6.9986	6.4956	6.5833	4.8513	5.405	4.6748	4.9376	5.0125	4.4227
metab_2119	pos_2124	474.394	1.1818	1.2288	0.001	0.0024	6.3547	6.5374	5.7995	6.4717	5.6817	6.439	4.8551	5.9348	4.4422	5.1876	5.0052	4.9169
metab_2120	pos_2125	525.355	2.1365	3.1619	0.0001	0.0002	4.7205	5.3973	4.8687	5.2042	4.9064	5.6006	2.7385	0.4859	2.8394	2.71	0.5145	0.4169
metab_2121	pos_2126	453.335	1.3959	1.2788	0	0.0002	7.0128	7.142	6.045	7.13	6.5235	6.7397	5.2494	5.8981	5.108	5.2464	5.1494	5.0905
metab_2122	pos_2127	435.325	1.2498	1.2253	0	0	6.1641	6.4899	5.8806	6.2318	6.0167	6.1548	5.1372	5.3849	4.9402	4.9002	5.0801	4.6985
metab_2123	pos_2128	500.409	0.3114	1.0433	0.3896	0.4413	5.9896	6.0821	4.7936	5.8832	5.4157	5.7003	5.1324	6.2157	5.2704	5.4617	5.3212	5.0612
metab_2124	pos_2129	663.385	0.017	1.0075	0.9472	0.9564	4.495	5.1016	3.3371	4.9041	5.2187	4.4938	3.9875	5.7309	3.0228	4.4434	4.6812	5.4837
metab_2125	pos_2130	195.122	0.412	1.0275	0.0007	0.0017	5.0351	5.1152	5.1512	5.1117	5.0086	5.1055	4.9231	5.0012	4.8814	4.9578	4.9781	4.9675
metab_2126	pos_2131	496.42	0.3273	1.0204	0.0824	0.1102	6.748	6.8562	6.6364	6.8484	6.6442	6.8	6.5396	6.895	6.5047	6.6204	6.5668	6.5985
metab_2127	pos_2132	425.377	0.7026	0.9155	0.0137	0.0226	5.727	5.9291	5.7298	5.8224	5.7822	5.7996	6.307	7.0876	6.4375	6.1242	6.2583	5.782
metab_2128	pos_2133	226.18	0.4954	1.0393	0.0022	0.0047	5.4071	5.5694	5.61	5.7283	5.5996	5.7611	5.3783	5.3947	5.4028	5.3902	5.4157	5.4222
metab_2129	pos_2134	419.33	0.5577	1.0813	0.0813	0.109	5.4768	5.6661	4.6981	5.4621	5.1899	5.1832	4.7169	5.5822	4.6543	4.9185	4.8727	4.5503
metab_2132	pos_2137	465.333	1.1558	1.1622	0	0	6.9012	7.0645	6.5864	6.9652	6.9101	7.0942	5.8375	5.9926	5.9361	5.9405	6.0962	5.9215
metab_2133	pos_2138	427.32	1.9902	1.7357	0	0	6.8232	7.184	5.8524	6.992	6.6086	6.7285	4.1455	4.0276	3.3304	4.0292	3.907	3.7158
metab_2134	pos_2139	427.356	1.2325	1.1988	0	0	6.6463	6.928	6.378	6.7315	6.5634	6.8723	5.7501	5.7204	5.4896	5.3327	5.4332	5.7416
metab_2135	pos_2140	522.376	1.4724	1.3268	0	0.0002	6.1977	6.7258	6.8414	6.2746	6.7255	6.525	5.112	5.4497	5.0327	4.2262	5.3509	4.4363
metab_2137	pos_2142	439.32	1.8845	1.6332	0	0	6.7047	7.0779	5.9276	6.8352	6.5891	6.5287	3.8512	5.032	4.1349	3.8939	3.8832	3.4928
metab_2139	pos_2144	226.216	0.3855	1.0215	0.0043	0.0082	6.6232	6.6442	6.4764	6.5393	6.4651	6.5841	6.3533	6.4755	6.349	6.4486	6.4218	6.455
metab_2140	pos_2145	177.163	0.3948	1.0267	0.0061	0.0111	5.5974	5.6719	5.4955	5.5393	5.4193	5.5604	5.3245	5.4843	5.3605	5.416	5.419	5.4109
metab_2142	pos_2147	284.285	0.4066	1.0214	0.0029	0.0058	7.1379	7.1701	7.0148	7.0474	6.9796	7.0895	6.8309	6.9896	6.8855	6.9343	6.9556	6.953
metab_2143	pos_2148	240.232	0.4123	1.0235	0.001	0.0024	6.2769	6.3424	6.2185	6.254	6.1656	6.2937	6.0453	6.1677	6.082	6.1062	6.1353	6.1544
metab_2144	pos_2149	156.138	0.4248	1.0278	0.0013	0.003	5.737	5.7777	5.6347	5.6619	5.5858	5.7088	5.4535	5.5882	5.4977	5.5182	5.5546	5.5652
metab_2146	pos_2151	301.179	1.2478	1.3249	0.0003	0.0008	5.0278	5.6725	4.1137	5.4708	5.0225	5.423	3.8424	3.9501	3.7992	3.8438	3.9161	3.8432
metab_2147	pos_2152	388.284	0.375	0.9538	0.2974	0.3469	5.3339	5.1581	5.3527	5.821	6.799	5.6178	5.9341	5.9113	5.7806	5.9655	6.2139	5.9264
metab_2150	pos_2155	402.333	0.3558	0.9288	0.4044	0.4566	4.5656	4.7495	4.3287	3.9506	4.4073	4.6162	6.1023	5.4579	3.4536	4.4226	4.7031	4.5163
metab_2151	pos_2156	481.328	1.184	1.1985	0.001	0.0023	7.3929	7.6557	6.3369	7.5256	7.2878	7.3455	5.6839	5.8745	6.5318	5.4945	6.4923	6.252
metab_2152	pos_2157	477.297	0.5551	1.0633	0.0327	0.0484	5.808	5.946	5.3778	5.9061	5.9956	5.7341	5.4039	5.9355	5.1739	5.3754	5.3639	5.4468
metab_2153	pos_2158	437.304	1.6254	1.5806	0.0002	0.0006	5.8218	6.1408	5.1972	5.9104	5.9197	5.7023	3.9542	3.6735	1.9805	4.1848	4.0181	4.1354
metab_2154	pos_2159	667.453	0.6821	1.1706	0.1835	0.225	5.6007	5.2929	5.9031	5.5782	5.4336	4.5891	3.2498	5.6593	3.8452	5.5919	3.3235	6.0061
metab_2156	pos_2161	504.441	0.5283	0.9273	0.1133	0.1466	5.3949	5.6915	4.5087	5.5485	5.0734	5.3002	5.5172	6.4344	5.3564	5.643	5.3606	5.6778
metab_2157	pos_2162	237.221	0.5765	1.0462	0	0	5.5403	5.4972	5.4777	5.5054	5.4756	5.5492	5.204	5.3208	5.2225	5.2562	5.2718	5.314
metab_2158	pos_2163	461.341	0.4057	0.9537	0.1291	0.1645	5.2341	5.4494	5.1153	5.1225	5.1057	5.1045	4.9441	5.7201	5.3394	5.3321	5.9419	5.3669
metab_2159	pos_2164	459.383	0.0101	0.9965	0.9534	0.9616	5.1225	5.2971	3.8716	5.0906	4.6869	4.6433	4.5994	5.6669	4.5944	4.6667	4.9473	4.3393
metab_2160	pos_2165	411.325	1.6273	1.4537	0	0	6.1407	6.4126	5.6682	6.2458	5.9398	6.1045	4.4863	4.2081	3.7913	4.3839	4.41	3.8353
metab_2161	pos_2166	316.263	0.0155	1.001	0.9823	0.9857	6.0117	6.1168	5.9698	5.9957	5.9681	6.1098	6.9437	5.5509	6.6188	5.8671	5.7078	5.4493
metab_2164	pos_2169	467.313	1.1598	1.2005	0.0008	0.002	6.9973	7.1162	6.1799	7.065	6.721	6.9134	5.218	5.3559	6.3504	5.2956	6.1653	5.7585
metab_2165	pos_2170	409.309	1.3855	1.2804	0	0	6.539	6.8584	5.8683	6.6862	6.2422	6.4377	5.0045	5.3793	4.8869	5.0229	4.9006	4.9789
metab_2166	pos_2171	502.425	0.2602	0.972	0.3381	0.389	6.2641	6.487	6.0467	6.2519	5.9193	6.138	6.222	7.1088	5.9867	6.3233	6.3115	6.2208
metab_2167	pos_2172	441.336	1.4289	1.2503	0	0	7.1799	7.5817	6.9296	7.3819	7.3557	7.4147	5.6701	5.7408	5.982	6.0286	5.8056	5.8384
metab_2168	pos_2173	319.284	0.7475	1.0715	0	0.0001	6.2954	6.3681	6.0717	6.3531	6.1984	6.2918	5.8014	5.8841	5.8034	5.8328	5.8136	5.9345
metab_2169	pos_2174	451.361	0.8161	1.1492	0.0066	0.012	5.0231	5.079	4.6088	5.1904	4.9416	5.2003	4.355	4.556	3.7255	4.2311	4.2893	4.9838
metab_2170	pos_2175	352.32	0.5988	1.0552	0.0043	0.0082	6.4048	6.5276	6.2704	6.4854	6.3898	6.5857	5.9108	6.0355	5.9698	6.4609	6.1449	6.1208
metab_2171	pos_2176	223.205	0.3633	1.0242	0.0158	0.0255	5.5257	5.6785	5.6471	5.6956	5.6442	5.828	5.4838	5.6115	5.5241	5.5313	5.471	5.5939
metab_2173	pos_2178	479.313	1.3256	1.29	0.0006	0.0015	6.7084	6.9179	5.7674	6.7894	6.5087	6.4657	5.3321	4.4328	5.8738	4.2839	5.1788	5.255
metab_2174	pos_2179	647.412	0.7669	1.115	0.018	0.0286	5.7356	5.754	5.7979	6.4319	5.7827	6.9146	5.3769	5.3641	5.2822	5.3172	5.4124	5.9026
metab_2175	pos_2180	315.231	1.4578	1.4848	0.0003	0.0008	5.2031	5.7991	4.1882	5.3942	5.0852	5.3129	3.1885	4.5009	3.1454	3.58	3.2622	3.1894
metab_2176	pos_2181	659.398	0.7005	1.1357	0.093	0.1232	4.8445	5.7483	6.0641	6.2296	6.0379	6.2817	5.0123	4.3606	4.3762	6.1031	5.1626	5.9854
metab_2177	pos_2182	109.101	0.4406	1.0343	0.0097	0.0167	5.7734	5.7832	5.5314	5.6478	5.5453	5.5904	5.3687	5.6273	5.388	5.4575	5.4734	5.4319
metab_2178	pos_2183	631.454	0.2086	1.0198	0.4273	0.4798	6.8047	6.5844	6.7863	6.5859	6.4515	6.983	6.579	6.4999	6.263	6.1906	7.0835	6.7973
metab_2179	pos_2184	357.242	1.1735	1.2781	0.0002	0.0007	4.9565	5.6785	4.2357	5.2238	5.2364	5.2511	3.9644	4.0721	3.9212	3.9658	4.0381	3.9653
metab_2180	pos_2185	481.328	1.3277	1.2185	0	0.0001	7.4987	7.8059	6.9882	7.6553	7.6105	7.6453	5.8138	5.7576	6.6365	6.249	6.4621	6.1767
metab_2181	pos_2186	637.304	0.929	1.1024	0	0.0001	6.6893	6.8872	7.0371	6.907	6.9593	6.9061	6.3556	6.0583	6.235	6.3773	6.4426	6.074
metab_2182	pos_2187	445.367	1.1203	1.2103	0.0019	0.0041	5.5993	6.0888	6.3757	6.4707	5.7782	7.083	5.5027	4.9305	5.4146	4.7041	4.9076	5.4414
metab_2183	pos_2188	212.201	0.3806	1.0255	0.01	0.0171	5.861	5.7301	5.6122	5.7371	5.6379	5.6882	5.4847	5.6552	5.5293	5.5994	5.618	5.5245
metab_2184	pos_2189	429.318	0.7865	1.0768	0	0.0002	6.7679	6.8401	6.394	6.7817	6.6089	6.6508	6.1636	6.2108	6.1532	6.1728	6.2284	6.2578
metab_2185	pos_2190	210.185	0.4141	1.0294	0.0124	0.0206	6.1049	6.1302	5.858	6.0067	5.8969	5.9412	5.7169	5.9524	5.7549	5.8267	5.842	5.8196
metab_2186	pos_2191	156.138	0.3612	1.0258	0.0239	0.0368	5.8214	5.7549	5.5511	5.6705	5.5288	5.5761	5.417	5.5558	5.4738	5.5068	5.5596	5.5361
metab_2187	pos_2192	112.112	0.4892	1.0308	0	0.0002	6.107	6.1407	6.0637	6.1	6.0178	6.1489	5.8729	5.9757	5.8952	5.8864	5.9029	5.9538
metab_2188	pos_2193	711.428	0.6023	0.8188	0.3003	0.3501	3.0251	3.0577	4.919	4.2843	4.27	2.9988	2.6965	6.1398	2.6534	6.4121	5.4346	4.2105
metab_2189	pos_2194	468.389	0.6412	1.0469	0	0.0001	6.8865	7.0039	6.8021	6.9787	6.8494	6.9566	6.5748	6.646	6.5486	6.5706	6.5799	6.7009
metab_2190	pos_2195	354.299	0.2499	1.0386	0.4733	0.5248	4.8316	5.4678	4.0323	5.2266	4.6304	5.0487	4.2	5.1066	4.9127	4.5608	4.767	4.6043
metab_2191	pos_2196	280.176	0.3319	1.0223	0.0273	0.0412	5.7778	5.7142	5.5292	5.6704	5.5576	5.5645	5.4279	5.5549	5.4662	5.5558	5.5751	5.501
metab_2192	pos_2197	282.27	0.3585	1.0221	0.0254	0.0387	6.6823	6.6228	6.4113	6.5141	6.3892	6.4386	6.2847	6.4212	6.3302	6.378	6.4256	6.3729
metab_2193	pos_2198	196.169	0.4289	1.0324	0.011	0.0186	5.8975	5.9429	5.6594	5.7677	5.6515	5.7185	5.4899	5.7051	5.5559	5.5931	5.6274	5.5818
metab_2195	pos_2200	336.325	0.5372	1.0472	0.0064	0.0117	6.1626	6.3155	6.0329	6.2357	6.1313	6.2947	5.7636	5.8323	5.8225	6.2358	5.9168	5.9264
metab_2196	pos_2201	491.313	1.5522	1.4226	0.0001	0.0003	6.3793	6.6519	5.569	6.3788	6.2307	6.1138	4.5247	5.2626	3.6078	4.7789	4.1724	3.8932
metab_2197	pos_2202	533.324	0.6944	1.1109	0.0625	0.0861	5.9264	6.0133	5.5563	5.8752	5.9897	5.5446	5.0055	6.3964	4.4772	5.1655	5.4028	4.9731
metab_2198	pos_2203	495.308	2.1805	2.1392	0	0	6.6991	6.7747	5.9434	6.7216	6.509	6.3485	2.6956	4.4959	2.0806	2.7556	2.8186	3.3845
metab_2199	pos_2204	407.279	0.6138	0.9352	0.0069	0.0124	5.1358	5.2033	5.1425	5.0088	5.1414	5.278	5.2975	5.7409	5.2371	5.4648	5.8516	5.4615
metab_2202	pos_2207	423.361	0.0495	1.0025	0.8929	0.9106	7.1171	7.4228	7.099	7.2173	7.1389	7.2561	7.1265	7.7783	6.9834	7.0667	7.0582	7.1309
metab_2203	pos_2208	215.179	0.5926	1.0826	0.0431	0.062	5.1094	5.5604	4.8562	5.2143	5.0254	5.285	4.7972	5.4242	4.4133	4.7241	4.692	4.6278
metab_2204	pos_2209	504.44	0.7682	0.8931	0.0186	0.0294	5.2428	5.587	4.8334	5.0559	5.2622	5.2409	5.8045	6.6977	5.2246	5.6984	5.6572	5.8816
metab_2205	pos_2210	377.315	1.2327	1.302	0.0007	0.0018	6.6782	5.67	4.9443	5.7073	4.9715	5.4511	4.355	4.0743	4.0359	4.4487	4.3981	4.3563
metab_2207	pos_2212	701.458	1.1813	1.2099	0.0005	0.0014	6.5595	6.6679	6.9654	6.1819	6.7182	6.0608	4.781	5.9441	5.1114	5.3361	5.821	5.3732
metab_2208	pos_2213	352.284	0.3427	0.9662	0.2	0.2432	5.4652	5.7077	5.5081	5.4514	5.3931	5.5362	5.4311	5.5184	5.3137	6.1032	6.0059	5.8444
metab_2212	pos_2217	398.326	1.1894	1.1955	0	0.0001	6.1281	6.5069	6.1992	6.5381	6.1418	6.8654	5.5306	5.4963	5.2794	5.3194	5.2532	5.2286
metab_2213	pos_2218	458.347	1.046	1.1359	0	0	6.6331	6.9586	6.4686	6.8473	6.6083	6.9993	6.0619	5.9217	6.0106	5.8586	5.8998	5.9186
metab_2214	pos_2219	370.294	1.0554	1.1437	0	0.0001	6.3474	6.6056	6.5827	6.6809	6.1896	6.8515	5.9162	5.8064	5.6814	5.6783	5.5913	5.6497
metab_2215	pos_2220	532.399	1.338	1.2996	0.0009	0.0022	6.1959	6.4138	6.3992	6.1652	6.2093	6.1917	4.8219	6.0367	5.3697	4.1928	4.2986	4.1923
metab_2216	pos_2221	507.271	0.0364	0.9985	0.9463	0.9559	6.3128	6.3674	6.5044	6.1218	6.7873	6.9863	6.5448	6.4512	6.5879	6.536	6.3534	6.6636
metab_2217	pos_2222	499.339	1.5607	1.3617	0	0	6.5432	6.7355	6.5381	6.6421	6.4239	6.5314	4.4598	5.4955	4.841	4.3942	5.0194	4.7362
metab_2218	pos_2223	425.304	0.9821	1.126	0.0005	0.0014	7.2071	7.5523	6.5487	7.3811	7.0128	7.1504	6.3428	6.4491	6.0232	6.282	6.44	6.5221
metab_2219	pos_2224	401.23	0.9046	1.1711	0.002	0.0043	5.1601	4.5921	5.0001	4.851	5.7184	4.5714	4.2305	4.3382	4.1873	4.2318	4.3042	4.2313
metab_2222	pos_2227	277.179	1.7812	1.6849	0	0	5.4029	5.6072	5.1695	5.4929	5.8329	5.3821	3.2293	3.337	3.1861	3.2307	3.303	3.2302
metab_2223	pos_2228	457.331	1.4339	1.2808	0	0	6.7817	7.1042	6.335	6.9888	6.9384	6.9038	5.0977	5.3031	5.7741	5.4517	5.3697	5.0538
metab_2224	pos_2229	461.324	1.1542	1.2102	0.0005	0.0012	6.1124	6.4092	5.8676	6.2681	6.1492	6.12	4.7567	5.3439	5.3291	4.6348	5.8027	4.6431
metab_2225	pos_2230	435.308	0.0933	1.0105	0.7805	0.812	5.478	5.5291	5.1849	5.3429	5.1305	5.1248	5.1946	5.7909	4.5711	5.0278	5.6379	5.2367
metab_2226	pos_2231	703.474	1.0387	1.1464	0.0007	0.0018	6.7413	6.9005	7.2604	6.6212	6.9625	6.4881	5.5683	6.5674	5.7538	5.9686	6.1038	5.7826
metab_2227	pos_2232	425.214	0.0697	1.003	0.5233	0.5727	6.4366	6.3464	6.4179	6.4981	6.4238	6.4643	6.357	6.3781	6.4082	6.3895	6.4356	6.5013
metab_2228	pos_2233	427.32	1.0803	1.1832	0.001	0.0023	6.3929	6.7195	5.7908	6.631	6.2685	6.4524	5.214	5.0054	6.1619	5.2849	5.4846	5.1806
metab_2231	pos_2236	517.389	1.4034	1.3124	0	0.0002	6.1238	6.3806	6.0558	6.1954	6.2627	6.0397	4.3947	5.5569	5.1066	4.4629	4.4287	4.2886
metab_2233	pos_2238	417.31	1.5549	1.404	0	0.0001	6.0692	6.3068	5.885	6.1633	6.5685	6.2259	4.461	5.3168	3.9488	4.3134	4.4774	3.9928
metab_2235	pos_2240	534.415	1.0877	1.2011	0.005	0.0093	6.5651	6.8067	5.7753	6.6855	6.4471	6.6794	5.6115	6.3204	4.7001	5.7854	4.6668	5.3493
metab_2236	pos_2241	647.449	0.1427	0.9881	0.5865	0.6326	6.5789	6.4224	6.3264	6.6678	6.3682	7.044	6.3868	6.8528	6.9038	6.4024	6.6413	6.6952
metab_2237	pos_2242	346.271	0.6343	1.0612	0.001	0.0023	6.2071	5.9131	5.8546	5.9964	5.7891	5.9485	5.5893	5.6325	5.4279	5.7662	5.6525	5.5824
metab_2238	pos_2243	339.289	1.0737	1.1877	0.0002	0.0007	5.8132	6.2173	5.1712	6.224	5.6554	5.8425	4.8215	4.9536	5.0394	4.8446	4.7861	4.9614
metab_2239	pos_2244	679.381	1.3245	0.768	0.0009	0.0023	5.8744	5.5801	4.8155	4.4456	4.2175	4.2269	6.0814	6.5197	5.8423	6.463	6.7035	6.3597
metab_2240	pos_2245	447.346	1.6511	1.507	0	0	5.6416	6.1867	5.5856	5.9663	5.645	5.946	4.1624	4.3232	3.7048	3.4106	3.483	4.1222
metab_2241	pos_2246	337.237	1.3532	1.3412	0	0	5.2336	5.6805	5.3146	5.4288	4.9503	4.7843	3.7991	3.8464	4.2023	3.7401	3.8124	4.0063
metab_2242	pos_2247	483.308	1.7508	1.4859	0	0	6.9509	7.1269	6.1008	7.0789	6.745	6.8405	4.8429	5.0653	4.1783	4.8164	4.102	4.4799
metab_2243	pos_2248	563.355	1.171	1.2404	0.0042	0.0081	6.1906	6.4234	6.7122	6.2758	6.5173	6.304	4.8198	5.8753	3.8421	6.0534	5.3589	5.0304
metab_2244	pos_2249	454.292	0.8459	0.9057	0.0054	0.01	6.5651	6.6381	7.0641	6.4545	6.3234	6.1408	7.1292	7.008	7.6451	6.6646	7.4225	7.3996
metab_2245	pos_2250	439.284	1.0901	1.1709	0	0.0001	6.1165	6.4196	5.6536	6.2884	5.923	6.1091	5.2567	5.2428	5.1762	5.1929	5.1175	5.1967
metab_2246	pos_2251	465.282	1.0781	0.8642	0.0003	0.0009	5.9149	6.1986	5.4973	6.0771	5.988	5.7509	6.9122	7.082	6.2146	6.7021	6.9417	7.139
metab_2247	pos_2252	365.316	1.7509	1.5492	0.0002	0.0007	7.4729	6.7206	5.9777	7.003	6.9776	7.0231	4.8447	4.3384	4.9082	5.1505	4.7501	2.5879
metab_2248	pos_2253	298.274	0.4298	1.0248	0.0027	0.0054	7.0285	6.8799	6.8069	6.9073	6.7696	6.8316	6.6376	6.7548	6.6638	6.722	6.7318	6.7218
metab_2249	pos_2254	391.293	1.1963	1.236	0.0001	0.0004	5.6205	6.0453	5.2983	6.0692	6.2608	5.9286	4.706	5.0914	4.3371	5.049	4.7143	4.597
metab_2250	pos_2255	343.331	0.3509	1.0233	0.0255	0.0389	6.147	5.982	5.8969	6.011	5.8232	5.9379	5.799	5.8889	5.7715	5.8544	5.7582	5.9094
metab_2251	pos_2256	320.255	0.2607	1.0139	0.0639	0.0878	6.689	6.4644	6.4617	6.5427	6.4092	6.4682	6.3598	6.4084	6.4122	6.4484	6.4151	6.4557
metab_2252	pos_2257	319.19	1.1519	1.2384	0.0003	0.0007	5.7062	6.0633	4.7195	5.8624	5.4675	5.4103	4.4482	4.5559	4.405	4.4496	4.5219	4.4491
metab_2254	pos_2259	841.433	0.6669	0.9008	0.0684	0.0933	5.2019	5.2345	5.1441	5.2403	5.1661	5.1755	5.0419	6.4195	4.8296	6.0811	6.4122	5.8109
metab_2255	pos_2260	477.356	0.8822	1.1386	0.0096	0.0165	6.3098	6.6739	5.4973	6.4688	6.2237	6.4377	5.1668	6.0166	4.9648	5.587	5.9336	5.367
metab_2256	pos_2261	481.399	0.563	1.0736	0.0479	0.0681	6.525	5.3833	5.6033	5.7242	5.3995	5.5668	5.352	5.3121	5.3126	5.2833	5.32	5.2765
metab_2257	pos_2262	385.305	0.4111	0.9614	0.1448	0.1818	6.0486	6.3532	5.8143	6.2473	6.3145	6.4595	6.5612	5.9706	6.8195	6.4809	6.6549	6.2428
metab_2258	pos_2263	308.294	0.4677	1.0344	0.0042	0.008	6.2847	5.972	6.0149	6.0635	6.0342	6.1115	5.8266	6.0048	5.8148	5.9218	5.8873	5.8118
metab_2260	pos_2265	499.376	0.1651	0.9844	0.4881	0.5391	6.6702	6.8923	6.4111	6.7756	6.4764	6.6137	6.6626	7.3685	6.5827	6.5937	6.6404	6.6193
metab_2261	pos_2266	248.201	0.5937	1.0691	0.04	0.058	5.957	6.4452	5.6731	6.556	5.9408	6.3504	5.584	6.0943	5.7833	5.4497	5.7594	5.8668
metab_2262	pos_2267	377.304	1.2186	1.2203	0	0.0001	5.9029	6.2582	6.237	5.9592	5.8138	6.0293	4.7911	5.5142	4.7263	4.9521	5.0038	4.6793
metab_2263	pos_2268	360.31	1.3594	1.3228	0	0.0002	5.5239	5.9719	5.0562	6.0278	5.8351	6.2318	4.4225	4.7049	4.4002	4.5159	3.9224	4.2229
metab_2264	pos_2269	325.215	0.7986	1.0973	0.0008	0.002	6.214	6.4013	5.653	6.239	5.9044	6.1347	5.4437	5.5834	5.5739	5.5836	5.4639	5.6589
metab_2265	pos_2270	271.154	0.8803	1.1341	0.0001	0.0004	4.9825	5.413	4.8454	5.3009	5.27	5.1946	4.509	4.5463	4.4328	4.7945	4.4927	4.567
metab_2266	pos_2271	243.174	0.6658	1.1093	0.0466	0.0664	5.0382	5.3683	5.1906	5.0794	4.8317	4.9398	5.1679	4.5395	4.5866	5.1177	4.0873	3.9504
metab_2268	pos_2273	422.253	0.3652	1.083	0.5062	0.5563	4.4493	4.8598	6.093	4.1524	3.5766	2.9412	3.764	4.2191	4.6333	3.9615	4.224	3.2694
metab_2269	pos_2274	409.344	1.4159	1.2967	0.0001	0.0003	6.3526	6.5712	6.5402	6.587	6.8721	6.883	5.8406	5.5972	5.1321	5.0149	4.6699	4.4407
metab_2270	pos_2275	576.409	1.0001	1.1329	0	0.0002	6.3512	6.5103	6.478	6.8279	6.6286	6.593	5.7532	5.5132	5.6389	6.1529	5.8473	5.8668
metab_2271	pos_2276	472.305	1.4099	1.346	0.0003	0.0008	5.9133	7.1445	6.1117	6.3216	5.6197	5.7925	4.0974	4.6972	3.9728	4.6477	4.8897	5.1122
metab_2272	pos_2277	603.334	1.3686	0.7749	0.0005	0.0013	4.7327	5.3576	6.2827	4.874	6.0746	4.7064	6.8187	6.7424	7.2818	6.4784	7.1	6.911
metab_2273	pos_2278	708.488	0.5356	1.0698	0.1093	0.1421	5.901	6.1468	6.2077	6.4692	6.2691	6.2345	6.1989	5.0565	6.4666	6.0848	5.5087	5.4818
metab_2274	pos_2279	245.226	0.4881	1.0485	0.0339	0.0501	6.1539	5.9373	5.7474	5.7302	5.4154	5.6608	5.5674	5.6245	5.3637	5.519	5.491	5.4784
metab_2275	pos_2280	500.392	0.672	1.0963	0.0607	0.084	5.9197	6.693	5.3528	6.6741	5.9597	6.4277	5.5359	6.3337	5.4043	5.5218	5.4905	5.4867
metab_2276	pos_2281	439.283	1.5232	1.3934	0	0.0001	6.2902	6.5679	5.4605	6.4153	5.8815	6.1551	4.9025	4.7171	4.0948	4.5572	4.0058	4.1113
metab_2277	pos_2282	752.514	1.097	1.206	0.0006	0.0016	5.5075	5.8793	5.9205	6.2353	5.9823	6.017	4.633	4.2031	4.8577	5.4355	5.1349	5.2074
metab_2278	pos_2283	539.318	0.3752	1.0364	0.2147	0.259	7.5753	7.1792	7.1379	6.9083	6.4423	6.8055	7.0482	6.8992	6.5353	6.9122	6.4097	6.7657
metab_2280	pos_2285	429.299	1.4057	1.3003	0	0.0002	6.4492	6.778	6.0016	6.5496	6.2655	6.4858	4.6835	5.7626	5.0742	5.0065	4.6271	4.4786
metab_2281	pos_2286	410.289	0.55	1.0641	0.0479	0.0681	6.1288	6.4248	5.8641	6.3113	6.494	6.3139	5.4716	5.5226	6.316	6.0695	6.105	5.7878
metab_2283	pos_2288	189.127	0.7905	1.0853	0	0	5.6643	5.7863	5.6784	5.6739	5.584	5.7239	5.1295	5.3639	5.2249	5.225	5.2375	5.2463
metab_2284	pos_2289	633.409	0.1036	0.9903	0.6893	0.7274	6.1705	5.6077	6.5463	5.912	5.9221	5.9845	5.8523	6.1591	5.9484	6.2241	6.0802	6.2313
metab_2285	pos_2290	475.341	1.2424	1.2013	0	0	6.6437	7.0273	6.3525	6.9781	6.6889	6.9137	5.6336	5.8337	5.4058	5.6918	5.8422	5.3932
metab_2286	pos_2291	224.201	0.3351	1.022	0.0251	0.0384	5.6865	5.5634	5.5471	5.6123	5.4575	5.6064	5.3658	5.5844	5.3769	5.4769	5.4979	5.4505
metab_2287	pos_2292	282.279	0.1761	1.0081	0.1343	0.1703	5.9256	5.937	5.8938	6.0137	5.9114	6.0339	5.8524	5.9373	5.9022	5.8668	5.9012	5.9689
metab_2289	pos_2294	149.132	0.6059	1.0558	0.0001	0.0003	5.2154	5.2982	5.2118	5.385	5.1405	5.2984	4.9537	5.0894	4.9386	4.9302	4.9499	5.0189
metab_2290	pos_2295	409.306	0.3219	0.9714	0.2871	0.3365	6.4897	6.5904	6.1474	6.6277	6.6902	6.7163	6.8714	6.0767	7.1178	6.8557	6.9111	6.5884
metab_2291	pos_2296	235.169	0.8671	1.0991	0	0	5.8553	6.0548	6.0531	6.0696	5.7957	6.0285	5.3688	5.5447	5.3841	5.4977	5.3896	5.4387
metab_2292	pos_2297	492.308	0.899	0.8905	0.0034	0.0067	5.9984	6.1251	5.4381	6.0537	5.9285	5.8206	6.4826	6.5101	7.1051	6.0201	7.0062	6.5873
metab_2293	pos_2298	446.347	2.9373	30.5455	0	0	5.5927	5.9919	6.5942	6.494	5.553	7.0695	0.1942	0.2362	0.1791	0.1947	0.2223	0.1945
metab_2294	pos_2299	717.453	1.0593	1.1965	0.0013	0.003	5.5937	5.7005	6.5188	5.3371	6.3272	5.3125	4.7698	4.9407	4.8767	4.9427	4.5896	4.9554
metab_2295	pos_2300	611.391	1.4569	1.386	0	0	5.2825	5.9303	5.1036	5.5208	5.2812	5.7799	4.0476	4.0173	3.8664	3.911	3.9833	3.9105
metab_2296	pos_2301	499.303	1.3155	1.2668	0.0001	0.0004	6.5171	6.6396	6.1429	6.6332	6.4265	6.5244	5.1251	5.3981	4.1502	5.187	5.2002	5.6327
metab_2297	pos_2302	319.226	1.3341	1.2604	0	0	6.2067	6.5242	5.9564	6.3254	6.1112	6.2888	4.7482	5.4075	4.683	5.0014	4.9831	4.8612
metab_2299	pos_2304	453.336	1.1185	1.1654	0.0008	0.0019	7.3279	7.6264	6.6513	7.4991	7.2828	7.4967	6.3118	6.9236	5.7312	6.453	6.0288	6.2062
metab_2300	pos_2305	698.43	1.1347	1.177	0	0	6.114	6.3341	5.9662	6.3679	5.9675	6.0765	5.3032	5.3354	5.101	5.3326	5.0611	5.1582
metab_2302	pos_2307	575.318	1.4909	1.4872	0.0008	0.0019	5.1585	5.886	6.0484	5.3814	6.0668	5.5291	2.0916	3.9716	3.8574	4.5063	4.3189	4.1648
metab_2303	pos_2308	360.092	1.2713	1.3841	0.001	0.0023	4.8512	5.2984	3.7859	5.6892	4.3504	5.4061	3.5146	3.6223	3.4715	3.516	3.5884	3.5155
metab_2304	pos_2309	507.309	0.9334	1.134	0.0024	0.0051	6.5986	6.9182	6.1486	6.6321	6.504	6.4939	5.3788	5.6712	6.2927	5.3212	6.1747	5.8122
metab_2306	pos_2311	463.303	0.951	1.1972	0.0188	0.0296	5.3467	5.4561	5.7142	5.4212	5.4784	6.0543	5.5553	5.0407	3.9845	5.3675	4.2492	3.7635
metab_2307	pos_2312	419.252	0.6011	1.0752	0.0282	0.0425	6.1084	5.6261	5.8541	6.1202	6.2096	6.0163	5.3563	5.5966	5.2098	6.0937	5.3396	5.8264
metab_2308	pos_2313	390.297	0.6195	0.9473	0.0003	0.0007	5.5832	5.3101	5.3633	5.4539	5.4017	5.4515	5.6546	5.6557	5.7727	5.8108	5.8555	5.6276
metab_2309	pos_2314	344.279	0.8441	1.1042	0.0003	0.0009	6.1556	6.1816	5.7798	6.1759	5.8416	6.288	5.256	5.594	5.6075	5.4705	5.6767	5.3789
metab_2310	pos_2315	187.148	0.8592	1.0999	0.0001	0.0003	6.231	6.4524	6.0378	6.2299	6.1287	6.2381	5.6556	5.9749	5.5111	5.6801	5.5396	5.5673
metab_2311	pos_2316	557.456	0.2372	1.0245	0.3544	0.4052	6.4496	6.1021	6.4753	5.9704	6.2285	6.2332	5.9469	6.2668	5.6912	5.9401	6.0924	6.625
metab_2313	pos_2318	547.36	0.4796	1.0563	0.1063	0.1385	5.8531	6.0052	5.5338	5.7395	5.7957	5.728	5.2836	6.2331	5.4941	5.3972	5.1255	5.277
metab_2314	pos_2319	388.105	1.1468	1.183	0.0003	0.0008	6.6887	6.9314	6.4672	7.2427	5.8928	6.6886	5.5995	5.7072	5.5563	5.6008	5.6732	5.6003
metab_2315	pos_2320	367.245	0.5846	0.9185	0.0695	0.0946	4.527	5.3545	5.9234	5.1175	5.5004	4.8386	5.5338	5.6796	5.4815	5.4343	6.1177	5.7879
metab_2316	pos_2321	306.279	0.9858	0.8531	0.002	0.0043	4.7203	4.1025	5.1504	4.7843	5.1153	5.1191	5.5601	5.2663	5.7497	6.1427	5.6291	5.637
metab_2317	pos_2322	132.044	1.7227	1.713	0	0	4.9416	5.3446	4.6913	5.7029	4.5627	5.343	2.8754	2.983	2.9921	2.8768	3.0934	3.0369
metab_2319	pos_2324	598.335	0.9659	0.8685	0.0015	0.0032	4.9787	5.5372	5.5791	5.1437	5.0775	5.2174	5.911	5.583	6.1726	5.7218	6.4893	6.4333
metab_2320	pos_2325	497.36	0.0165	1.0009	0.9678	0.9733	7.1168	7.2433	6.6932	7.1545	6.9778	7.1248	7.0045	7.5652	6.6686	6.9914	7.0602	6.9851
metab_2321	pos_2326	425.289	0.8992	0.8989	0.0005	0.0012	5.971	5.9357	5.9337	5.9571	5.8456	5.654	6.4904	6.2942	6.9126	6.169	6.8471	6.5576
metab_2322	pos_2327	379.246	0.8423	1.1079	0.0001	0.0004	5.2691	5.7011	5.6953	5.4242	5.4575	5.6027	4.9116	5.1878	5.0805	4.8571	5.023	4.8628
metab_2323	pos_2328	401.267	1.2793	1.233	0	0	6.1603	6.2811	6.0438	6.1195	6.0659	6.067	4.9571	5.1188	4.7878	5.1735	4.7949	4.9634
metab_2324	pos_2329	281.211	1.2206	1.2168	0	0	6.0414	5.9469	5.874	6.0338	5.7155	5.814	4.6771	5.0518	4.7507	4.9097	4.901	4.8223
metab_2326	pos_2331	293.211	0.8652	1.0822	0	0	7.3301	7.3241	7.4436	7.2233	7.2141	7.2472	6.5678	6.8216	6.5882	6.8363	6.7822	6.8644
metab_2327	pos_2332	247.205	1.0535	1.1574	0	0	5.958	5.9656	5.9199	5.8556	5.7997	5.8849	4.9383	5.2963	4.9351	5.1881	4.9658	5.2492
metab_2328	pos_2333	404.277	0.3463	1.0306	0.1454	0.1825	5.9454	6.2263	5.8398	6.2487	5.9379	6.3585	6.073	5.9404	5.7803	6.1801	5.7819	5.7148
metab_2329	pos_2334	513.355	0.4788	1.0398	0.0629	0.0865	7.2224	7.4212	7.1095	7.345	7.1383	7.3899	6.949	7.5023	6.5969	7.0568	6.8585	6.9965
metab_2330	pos_2335	459.346	1.2651	1.2089	0	0.0001	6.7539	7.1721	6.4162	7.1214	6.8607	7.2316	5.4508	5.7272	5.9091	5.6684	5.963	5.6577
metab_2331	pos_2336	471.346	1.3039	1.2158	0.0001	0.0002	7.3076	7.5984	6.6704	7.5819	7.2676	7.4812	5.9583	6.5722	5.6594	6.1918	5.8101	5.923
metab_2333	pos_2338	407.279	0.1245	0.99	0.6162	0.6601	6.2805	6.3547	5.9254	6.2642	6.1961	6.2168	6.1748	6.0828	6.6492	6.0373	6.5342	6.1352
metab_2334	pos_2339	577.334	1.3648	1.3465	0.0011	0.0025	5.7171	5.8839	6.6511	5.6826	6.0143	5.8669	3.7869	4.6729	5.125	3.7882	5.4386	3.7877
metab_2335	pos_2340	548.394	1.2379	1.3193	0.0012	0.0028	5.2763	5.9215	4.5326	5.8322	5.754	5.7546	4.0084	4.2705	3.9817	4.6448	3.3882	4.7762
metab_2336	pos_2341	370.2	1.4975	2.332	0.0177	0.0282	3.8389	1.7444	4.4467	5.6329	6.1276	2.0236	1.3928	3.2189	1.3514	1.3941	1.4638	1.3936
metab_2337	pos_2342	363.252	1.2861	1.2213	0	0	6.5572	6.5769	6.2418	6.6384	6.5675	6.4946	5.2088	5.681	5.198	5.3287	5.2561	5.3235
metab_2338	pos_2343	351.252	0.3886	1.0337	0.1999	0.2431	6.9352	7.2448	7.8869	7.0639	6.9657	7.1011	6.81	7.2955	6.6478	7.0041	7.0706	6.9641
metab_2340	pos_2345	417.297	1.2728	1.2847	0.0005	0.0014	5.9315	6.191	5.2629	6.3212	5.8421	6.5127	4.3787	5.286	4.4383	5.1897	4.0618	4.7156
metab_2341	pos_2346	347.219	0.943	1.1243	0.0001	0.0003	6.1793	6.1275	6.2584	6.1559	5.9439	5.9622	5.2929	5.3792	5.8806	5.3713	5.3596	5.2938
[truncated: 14,727 more rows]
