# Supplementary material for: Untargeted Metabolomics Reveals Multiple Phytometabolites in the Agricultural Waste Materials and Medicinal Materials of Codonopsis pilosula
Source: Front Plant Sci. 2022 Jan 10;12:814011. doi: 10.3389/fpls.2021.814011 (PMC8784785; doi:10.3389/fpls.2021.814011)
Supplement: Supplementary file 5 [file Table_2.XLSX]

## Sheet: Table S2
Table S2 Metabolites annotated with HMDB and KEGG databases
metab_id	m/z	Retention time	Name	HMDB					KEGG
				hmdb_id	hmdb_name	mass	cas_id	formula	ko_id	name	first_category	second_category	pathway_id	description	kegg_first_category	kegg_second_category		super_class	class	sub_class	Adducts
metab_18	277.216	6.45072	9,14-dihydroxy-10,12-octadecadienoic acid	LMFA02000167			-	C18H32O4	-	-	-	-	-	-	-	-		-	-	-	M+H-2H2O, M+NH4, M+2Na-H, M+H, M+Na
metab_24	328.138	2.98748	N-(1-Deoxy-1-fructosyl)phenylalanine	HMDB0037846	N-(1-Deoxy-1-fructosyl)phenylalanine	327.132	87251-83-0	C15H21NO7	-	-	-	-	-	-	-	-		Organic acids and derivatives	Carboxylic acids and derivatives	Amino acids, peptides, and analogues	M+Na, M+K, M+H, M+H-H2O, M+H-2H2O
metab_39	383.131	3.06735	1-(3,4-Dimethoxyphenyl)-1,2-ethanediol 1-O-b-D-glucoside	HMDB0034626	1-(3,4-Dimethoxyphenyl)-1,2-ethanediol 1-O-b-D-glucoside	360.142	251905-98-3	C16H24O9	-	-	-	-	-	-	-	-		Organic oxygen compounds	Organooxygen compounds	Carbohydrates and carbohydrate conjugates	M+Na, M+K, M+NH4, M+H
metab_41	367.149	3.47825	1-(1,2,3,4,5-Pentahydroxypent-1-yl)-1,2,3,4-tetrahydro-beta-carboline-3-carboxylate	HMDB0029992;HMDB0012492	Tetrahydropentoxyline;1-(1,2,3,4,5-Pentahydroxypent-1-yl)-1,2,3,4-tetrahydro-beta-carboline-3-carboxylate	366.142701068;366.142701068	-	C17H22N2O7	-	-	-	-	-	-	-	-		Alkaloids and derivatives	Harmala alkaloids	Not Available	M+H, M+Na, M+H-H2O, M+H-2H2O
metab_42	205.097	3.60718	L-Tryptophan	HMDB0000929	L-Tryptophan	204.09	73-22-3	C11H12N2O2	C00078	L-Tryptophan;Tryptophan;(S)-alpha-Amino-beta-(3-indolyl)-propionic acid	Peptides	Amino acids	map01100;map01110;map00260;map01210;map00998;map01230;map00966;map00901;map00970;map00400;map00380	Metabolic pathways; Biosynthesis of secondary metabolites; Glycine, serine and threonine metabolism; 2-Oxocarboxylic acid metabolism; Biosynthesis of various secondary metabolites - part 2; Biosynthesis of amino acids; Glucosinolate biosynthesis; Indole alkaloid biosynthesis; Aminoacyl-tRNA biosynthesis; Phenylalanine, tyrosine and tryptophan biosynthesis; Tryptophan metabolism	Metabolism;Metabolism;Metabolism;Metabolism;Metabolism;Metabolism;Metabolism;Metabolism;Genetic Information Processing;Metabolism;Metabolism	Global and overview maps;Global and overview maps;Amino acid metabolism;Global and overview maps;Biosynthesis of other secondary metabolites;Global and overview maps;Biosynthesis of other secondary metabolites;Biosynthesis of other secondary metabolites;Translation;Amino acid metabolism;Amino acid metabolism		Organoheterocyclic compounds	Indoles and derivatives	Indolyl carboxylic acids and derivatives	M+H, 2M+H, M+K, M+Na
metab_53	295.226	6.23818	9,12,13-TriHOME	LMFA02000014;HMDB0004708	9,12,13-TriHOME	330.241	-	C18H34O5	C14833	9,12,13-TriHOME;9(S),12(S),13(S)-Trihydroxy-10(E)-octadecenoic acid;(10E)-(9S,12S,13S)-9,12,13-Trihydroxyoctadec-10-enoic acid	-	-	map00591	Linoleic acid metabolism	Metabolism	Lipid metabolism		Lipids and lipid-like molecules	Fatty Acyls	Fatty acids and conjugates	M+H-2H2O, 2M+K, M+NH4, M+Na
metab_61	475.121	6.04112	Epicatechin 8-C-beta-D-glucopyranoside	-	-	-	-	C21H24O11	-	-	-	-	-	-	-	-		-	-	-	M+Na, M+K, M+NH4, M+H
metab_63	289.091	5.9444	Phlorin	HMDB0035589	Phlorin	288.085	28217-60-9	C12H16O8	-	-	-	-	-	-	-	-		Organic oxygen compounds	Organooxygen compounds	Carbohydrates and carbohydrate conjugates	M+H, M+ACN+H, M+H-H2O, M+H-2H2O
metab_65	199.111	5.85687	2-Naphthalenepropanol, 6-hydroxy-a-methyl-	-	-	-	-	C14H16O2	-	-	-	-	-	-	-	-		-	-	-	M+H-H2O, 2M+K, M+H, M+H-2H2O
metab_85	271.081	1.11508	Phenylglucuronide	HMDB0059806	Phenylglucuronide	270.074	-	C12H14O7	-	-	-	-	-	-	-	-		Organic oxygen compounds	Organooxygen compounds	Carbohydrates and carbohydrate conjugates	M+H, M+NH4, M+H-H2O, M+H-2H2O
metab_86	262.128	1.15847	N-(1-Deoxy-1-fructosyl)valine	HMDB0037844	N-(1-Deoxy-1-fructosyl)valine	279.132	-	C11H21NO7	-	-	-	-	-	-	-	-		Organic acids and derivatives	Carboxylic acids and derivatives	Amino acids, peptides, and analogues	M+H-H2O, M+H, M+Na, M+H-2H2O
metab_89	289.091	0.706733	Starch acetate	HMDB0029891	Starch acetate	306.095	-	C12H18O9	-	-	-	-	-	-	-	-		Organic acids and derivatives	Carboxylic acids and derivatives	Tricarboxylic acids and derivatives	M+H, M+ACN+H, M+H-H2O, M+H-2H2O
metab_90	255.097	0.7274	2-Amino-3,7-dideoxy-D-threo-hept-6-ulosonic acid	LMFA01050473			-	C7H13NO5	C16850	2-Amino-3,7-dideoxy-D-threo-hept-6-ulosonic acid	-	-	map01100;map00400;map01110	Metabolic pathways; Phenylalanine, tyrosine and tryptophan biosynthesis; Biosynthesis of secondary metabolites	Metabolism;Metabolism;Metabolism	Global and overview maps;Amino acid metabolism;Global and overview maps		-	-	-	M+H-2H2O, M+H-H2O, M+H, M+ACN+Na
metab_95	275.075	2.69163	Deoxyinosine	HMDB0000071	Deoxyinosine	252.086	890-38-0	C10H12N4O4	C05512	Deoxyinosine	-	-	map01100;map02010;map00230	Metabolic pathways; ABC transporters; Purine metabolism	Metabolism;Environmental Information Processing;Metabolism	Global and overview maps;Membrane transport;Nucleotide metabolism		Nucleosides, nucleotides, and analogues	Purine nucleosides	Purine 2'-deoxyribonucleosides	M+H, 2M+Na, M+Na, M+K
metab_97	339.155	2.79935	(-)-Norepinephrine	HMDB0000216;MJDBOTE0001316	Norepinephrine	169.074	-	C8H11NO3	C00547	L-Noradrenaline;Noradrenaline;Norepinephrine;Arterenol;4-[(1R)-2-Amino-1-hydroxyethyl]-1,2-benzenediol	Hormones and transmitters;Hormones and transmitters	Other hormones;Neurotransmitters	map01100;map00350	Metabolic pathways; Tyrosine metabolism	Metabolism;Metabolism	Global and overview maps;Amino acid metabolism		Benzenoids	Phenols	Benzenediols	M+H-2H2O, M+H, M+ACN+H, 2M+H
metab_98	353.268	6.60485	MG(18:3(6Z,9Z,12Z)/0:0/0:0)	HMDB0011569	MG(18:3(6Z,9Z,12Z)/0:0/0:0)	352.261	-	C21H36O4	-	-	-	-	-	-	-	-		Lipids and lipid-like molecules	Fatty Acyls	Lineolic acids and derivatives	M+H, M+2Na-H, M+NH4, M+H-H2O
metab_109	347.182	6.3618	Cibaric acid	HMDB0038580;LMFA02000289	Cibaric acid	324.194	130523-93-2	C18H28O5	-	-	-	-	-	-	-	-		Lipids and lipid-like molecules	Fatty Acyls	Lineolic acids and derivatives	M+Na, M+ACN+H, M+H, M+NH4
metab_138	342.139	0.651517	6-(alpha-D-Glucosaminyl)-1D-myo-inositol	HMDB0011668	6-(alpha-D-Glucosaminyl)-1D-myo-inositol	341.132	-	C12H23NO10	C15658	6-(alpha-D-Glucosaminyl)-1D-myo-inositol	-	-	-	-	-	-		Organic oxygen compounds	Organooxygen compounds	Carbohydrates and carbohydrate conjugates	M+H-H2O, M+H, M+H-2H2O
metab_140	248.112	0.7274	Linamarin	HMDB0005008;HMDB0033699	Lansoprazole;Linamarin	369.075882012;247.105587281	554-35-8	C10H17NO6	C01594	Linamarin;Phaseolunatin	-	-	map00460;map01100;map01110	Cyanoamino acid metabolism; Metabolic pathways; Biosynthesis of secondary metabolites	Metabolism;Metabolism;Metabolism	Metabolism of other amino acids;Global and overview maps;Global and overview maps		Organoheterocyclic compounds	Benzimidazoles	Sulfinylbenzimidazoles	M+H-H2O, M+H, M+H-2H2O
metab_142	173.092	0.755267	5-Aminolevulinic acid	HMDB0001149;MJDBOTE0001053	5-Aminolevulinic acid	131.058	106-60-5	C5H9NO3	C00430	5-Aminolevulinate;5-Amino-4-oxopentanoate;5-Amino-4-oxovaleric acid	-	-	map01100;map01110;map00860;map02010;map00260	Metabolic pathways; Biosynthesis of secondary metabolites; Porphyrin and chlorophyll metabolism; ABC transporters; Glycine, serine and threonine metabolism	Metabolism;Metabolism;Metabolism;Environmental Information Processing;Metabolism	Global and overview maps;Global and overview maps;Metabolism of cofactors and vitamins;Membrane transport;Amino acid metabolism		Organic acids and derivatives	Carboxylic acids and derivatives	Amino acids, peptides, and analogues	M+H-2H2O, M+ACN+H, M+Na
metab_161	278.123	1.04032	N-(1-Deoxy-1-fructosyl)proline	HMDB0038493	N-(1-Deoxy-1-fructosyl)proline	277.116	29118-61-4	C11H19NO7	-	-	-	-	-	-	-	-		Organoheterocyclic compounds	Benzodioxanes	Phenylbenzodioxanes	M+H-H2O, M+H, M+H-2H2O
metab_168	196.097	3.45445	3-oxo-C6-homoserine lactone	-	-	-	-	C10H15NO4	-	-	-	-	-	-	-	-		-	-	-	M+H-H2O, M+H, M+CH3OH+H
metab_186	481.131	4.49747	7-Hydroxy-4-methylphthalide O-[arabinosyl-(1->6)-glucoside]	HMDB0041336	7-Hydroxy-4-methylphthalide O-[arabinosyl-(1|right|6)-glucoside]	458.142	170473-74-2	C20H26O12	-	-	-	-	-	-	-	-		Organic oxygen compounds	Organooxygen compounds	Carbohydrates and carbohydrate conjugates	M+NH4, M+Na, M+H-2H2O
metab_189	206.081	4.43657	Epinephrine	HMDB0000068	Epinephrine	183.09	51-43-4	C9H13NO3	C00788	L-Adrenaline;(R)-(-)-Adrenaline;(R)-(-)-Epinephrine;(R)-(-)-Epirenamine;(R)-(-)-Adnephrine;4-[(1R)-1-Hydroxy-2-(methylamino)ethyl]-1,2-benzenediol	Hormones and transmitters;Hormones and transmitters	Other hormones;Neurotransmitters	map01100;map00350	Metabolic pathways; Tyrosine metabolism	Metabolism;Metabolism	Global and overview maps;Amino acid metabolism		Benzenoids	Phenols	Benzenediols	M+H-2H2O, M+ACN+H, M+Na
metab_194	333.133	4.26653	Catechin 5,7,3'-trimethyl ether	LMPK12020146			-	C18H20O6	-	-	-	-	-	-	-	-		-	-	-	M+H-H2O, M+H, M+H-2H2O
metab_207	674.28	3.98953	2-[2-(3,4-dihydroxyphenyl)ethoxy]-6-(hydroxymethyl)oxane-3,4,5-triol	HMDB0041024	Hydroxytyrosol 1-O-glucoside	316.116	76873-99-9	C14H20O8	-	-	-	-	-	-	-	-		Organic oxygen compounds	Organooxygen compounds	Carbohydrates and carbohydrate conjugates	M+ACN+H, 2M+ACN+H, M+ACN+Na
metab_212	188.07	3.60718	Methoxyindoleacetic acid	HMDB0004096	5-Methoxyindoleacetate	205.074	-	C11H11NO3	C05660	5-Methoxyindoleacetate;5-Methoxyindoleacetic acid	-	-	map00380	Tryptophan metabolism	Metabolism	Amino acid metabolism		Organoheterocyclic compounds	Indoles and derivatives	Indolyl carboxylic acids and derivatives	M+H-H2O, M+CH3OH+H, M+H-2H2O
metab_227	527.158	1.10812	1-Kestose	HMDB0011729	1-Kestose	504.169	470-69-9	C18H32O16	C03661	1F-beta-D-Fructosylsucrose;beta-D-Fructofuranosyl-(2|right|1)-beta-D-fructofuranosyl alpha-D-glucopyranoside	-	-	-	-	-	-		Organic oxygen compounds	Organooxygen compounds	Carbohydrates and carbohydrate conjugates	M+NH4, M+K, M+Na
metab_229	143.081	0.748367	Ectoine	HMDB0240650	Ectoine	142.074	96702-03-3	C6H10N2O2	C06231	Ectoine;L-Ectoine;(4S)-2-Methyl-1,4,5,6-tetrahydropyrimidine-4-carboxylate	-	-	map01100;map00260	Metabolic pathways; Glycine, serine and threonine metabolism	Metabolism;Metabolism	Global and overview maps;Amino acid metabolism		Organic acids and derivatives	Carboxylic acids and derivatives	Amino acids, peptides, and analogues	M+H-H2O, M+CH3OH+H, M+H
metab_267	286.154	2.64137	Histidinyl-Hydroxyproline	HMDB0028886	Histidylhydroxyproline	268.117	-	C11H16N4O4	-	-	-	-	-	-	-	-		Organic acids and derivatives	Carboxylic acids and derivatives	Amino acids, peptides, and analogues	M+CH3OH+H, M+ACN+H, M+NH4
metab_297	213.076	3.55247	2,3-Dihydroxy-1-(4-hydroxy-3-methoxyphenyl)-1-propanone	HMDB0041286	2,3-Dihydroxy-1-(4-hydroxy-3-methoxyphenyl)-1-propanone	212.068	168293-10-5	C10H12O5	-	-	-	-	-	-	-	-		Organic oxygen compounds	Organooxygen compounds	Carbonyl compounds	M+H-H2O, M+H, M+H-2H2O
metab_318	231.122	4.8901	Prenyl glucoside	HMDB0031876	Prenyl glucoside	248.126	117861-55-9	C11H20O6	C09808	Phellamurin;8-Prenyldihydrokaempferol 7-glucoside	-	-	-	-	-	-		Lipids and lipid-like molecules	Fatty Acyls	Fatty acyl glycosides	M+H-H2O, M+Na, M+H-2H2O
metab_319	449.107	4.8718	Chrysanthemin	LMPK12010110;HMDB0030684	Cyanidin 3-glucoside	449.108	-	C21H20O11	C08604	Chrysanthemin;Cyanidin 3-O-glucoside;Cyanidin 3-O-beta-D-glucoside	-	-	map00942	Anthocyanin biosynthesis	Metabolism	Biosynthesis of other secondary metabolites		Organoheterocyclic compounds	Pyrans	Pyranones and derivatives	M+H, M+K, M+Na
metab_354	383.1	5.56877	Melibiitol	HMDB0006791	Melibiitol	344.132	-	C12H24O11	C05399	Melibiitol;6-O-alpha-D-Galactosyl-D-glucitol	-	-	map00052	Galactose metabolism	Metabolism	Carbohydrate metabolism		Lipids and lipid-like molecules	Fatty Acyls	Fatty acyl glycosides	M+Na, M+K, M+CH3OH+H
metab_389	298.274	6.27378	Chaulmoogric Acid	LMFA01140017			-	C18H32O2	C08282	Chaulmoogric acid	-	-	-	-	-	-		-	-	-	M+H-2H2O, M+NH4, M+H-H2O
metab_407	135.08	6.50328	2,5-Dimethylbenzaldehyde	HMDB0032014	2,3,6-Trimethylbenzaldehyde	148.089	-	C9H10O	-	-	-	-	-	-	-	-		Benzenoids	Benzene and substituted derivatives	Benzoyl derivatives	M+H, M+ACN+H, M+H-H2O
metab_420	511.339	6.705	PC(16:1(9E)/0:0)	LMGP01050021			-	C24H48NO7P	-	-	-	-	-	-	-	-		-	-	-	M+H, M+Na, M+NH4
metab_430	297.242	6.86423	12,13-epoxy-9-octadecenoic acid	HMDB0004702;LMFA02000276	12,13-EpOME	296.235	-	C18H32O3	C14826	12(13)-EpOME;(12R,13S)-(9Z)-12,13-Epoxyoctadecenoic acid	-	-	map01100;map00591	Metabolic pathways; Linoleic acid metabolism	Metabolism;Metabolism	Global and overview maps;Lipid metabolism		Lipids and lipid-like molecules	Fatty Acyls	Fatty acids and conjugates	M+ACN+H, M+2Na-H, M+H
metab_440	696.54	6.99787	Glucocerebrosides	-	-	-	-	C40H75NO9	-	-	-	-	-	-	-	-		-	-	-	M+H-H2O, M+H, M+Na
metab_471	282.278	7.35288	9,12,15-Octadecatrien-1-ol	LMFA05000216			-	C18H32O	-	-	-	-	-	-	-	-		-	-	-	M+H, M+NH4, M+H-H2O
metab_473	467.349	7.59765	3-beta-Hydroxy-4-beta-methyl-5-alpha-cholest-7-ene-4-alpha-carboxylate	HMDB0011662	3-beta-Hydroxy-4-beta-methyl-5-alpha-cholest-7-ene-4-alpha-carboxylate	444.36	-	C29H48O3	C04840	3beta-Hydroxy-4beta-methyl-5alpha-cholest-7-ene-4alpha-carboxylate	-	-	-	-	-	-		Lipids and lipid-like molecules	Steroids and steroid derivatives	Cholestane steroids	M+H-H2O, M+Na, M+H
metab_505	417.239	8.81765	LPA(18:2(9Z,12Z)/0:0)	HMDB0007856;LMGP10050017	LysoPA(18:2(9Z,12Z)/0:0)	434.243	-	C21H39O7P	-	-	-	-	-	-	-	-		Lipids and lipid-like molecules	Glycerophospholipids	Glycerophosphates	M+H-H2O, M+H, M+Na
metab_514	629.438	7.0525	DG(18:3(9Z,12Z,15Z)/16:0/0:0)	HMDB0007301	DG(18:3(9Z,12Z,15Z)/16:0/0:0)	590.491	-	C37H66O5	-	-	-	-	-	-	-	-		Lipids and lipid-like molecules	Fatty Acyls	Lineolic acids and derivatives	M+H, M+K, M+H-H2O
metab_519	324.289	6.97978	Stearoylglycine	HMDB0013308	Stearoylglycine	341.293	-	C20H39NO3	-	-	-	-	-	-	-	-		Organic acids and derivatives	Carboxylic acids and derivatives	Amino acids, peptides, and analogues	M+H-H2O, M+ACN+Na, M+H-2H2O
metab_537	391.245	6.66678	Cortol	HMDB0003180;LMST02030228	Cortol	368.256	516-38-1	C21H36O5	C05482	Cortol	-	-	-	-	-	-		Lipids and lipid-like molecules	Steroids and steroid derivatives	Hydroxysteroids	M+H, M+Na, M+K
metab_540	331.187	6.6543	16-Hydroxy-10-oxohexadecanoic acid	HMDB0041287	16-Hydroxy-10-oxohexadecanoic acid	286.214	53833-25-3	C16H30O4	-	-	-	-	-	-	-	-		Lipids and lipid-like molecules	Fatty Acyls	Fatty acids and conjugates	M+Na, M+2Na-H, M+H-2H2O
metab_561	316.19	6.55378	Pentazocine trans acid	-	-	-	-	C19H25NO3	-	-	-	-	-	-	-	-		-	-	-	M+H, M+Na, M+H-H2O
metab_589	349.198	6.31535	Dinor-PGF2alpha	LMFA03010212			-	C18H30O5	-	-	-	-	-	-	-	-		-	-	-	M+NH4, M+Na, M+H
metab_593	300.289	6.30387	3-ketosphinganine	HMDB0001480;LMSP01020002	3-Dehydrosphinganine	299.282	16105-69-4	C18H37NO2	C02934	3-Dehydrosphinganine;3-Dehydro-D-sphinganine	-	-	map00600;map01100	Sphingolipid metabolism; Metabolic pathways	Metabolism;Metabolism	Lipid metabolism;Global and overview maps		Organic oxygen compounds	Organooxygen compounds	Carbonyl compounds	M+H-H2O, M+H, M+H-2H2O
metab_610	556.166	6.08373	Limocitrol 3-glucoside	LMPK12113320;HMDB0037690	Limocitrol 3-glucoside	538.132	77133-42-7	C24H26O14	-	-	-	-	-	-	-	-		Phenylpropanoids and polyketides	Flavonoids	Flavonoid glycosides	M+Na, M+K, M+NH4
metab_626	201.127	5.84987	3-Methyl-1-phenyl-3-pentanol	HMDB0031731	3-Methyl-1-phenyl-3-pentanol	178.136	10415-87-9	C12H18O	-	-	-	-	-	-	-	-		Benzenoids	Benzene and substituted derivatives	Not Available	M+H-H2O, M+Na, M+H
metab_631	424.127	5.56523	Goyazensolide	-	-	-	-	C19H20O7	C09467	Goyazensolide	-	-	-	-	-	-		-	-	-	M+H-H2O, M+ACN+Na, M+H
metab_638	199.112	5.38723	Alpha-Phenylcyclohexylglycolic acid	-	-	-	-	C14H18O3	-	-	-	-	-	-	-	-		-	-	-	M+H-H2O, M+H, M+H-2H2O
metab_685	147.113	0.5767	D-Pipecolic acid	HMDB0005960	D-Pipecolic acid	129.079	1723-00-8	C6H11NO2	-	-	-	-	-	-	-	-		Organic acids and derivatives	Carboxylic acids and derivatives	Amino acids, peptides, and analogues	M+H, M+NH4
metab_709	162.076	0.631033	3-Amino-2,3-dideoxy-scyllo-inosose	-	-	-	-	C6H11NO4	C17581	3-Amino-2,3-dideoxy-scyllo-inosose;2-Deoxy-3-keto-scyllo-inosamine	-	-	map01110	Biosynthesis of secondary metabolites	Metabolism	Global and overview maps		-	-	-	M+H, 2M+K
metab_710	175.119	0.631033	L-Arginine	HMDB0000517;HMDB0062762;MJDBOTE0000532	L-Arginine;L-argininium(1+)	174.111675712;175.119500744	74-79-3	C6H14N4O2	C00062	L-Arginine;(S)-2-Amino-5-guanidinovaleric acid;L-Arg	Peptides	Amino acids	map01100;map00220;map01110;map00472;map02010;map00330;map01230;map00970;map00261	Metabolic pathways; Arginine biosynthesis; Biosynthesis of secondary metabolites; D-Arginine and D-ornithine metabolism; ABC transporters; Arginine and proline metabolism; Biosynthesis of amino acids; Aminoacyl-tRNA biosynthesis; Monobactam biosynthesis	Metabolism;Metabolism;Metabolism;Metabolism;Environmental Information Processing;Metabolism;Metabolism;Genetic Information Processing;Metabolism	Global and overview maps;Amino acid metabolism;Global and overview maps;Metabolism of other amino acids;Membrane transport;Amino acid metabolism;Global and overview maps;Translation;Biosynthesis of other secondary metabolites		Organic acids and derivatives	Carboxylic acids and derivatives	Amino acids, peptides, and analogues	M+H-H2O, M+H
metab_724	120.066	0.665467	AMINOHYDROXYBUTYRIC ACID	-	-	-	-	C4H9NO3	-	-	-	-	-	-	-	-		-	-	-	M+H, 2M+ACN+Na
metab_728	192.065	0.706733	5,6-Dihydroxy-3-methyl-2-oxo-1,2-dihydroquinoline	-	-	-	-	C10H9NO3	C06725	5,6-Dihydroxy-3-methyl-2-oxo-1,2-dihydroquinoline	-	-	-	-	-	-		-	-	-	M+H, M+NH4
metab_740	116.071	0.762217	L-Proline	HMDB0000162	L-Proline	115.063	147-85-3	C5H9NO2	C00148	L-Proline;2-Pyrrolidinecarboxylic acid	Peptides	Amino acids	map01100;map01110;map02010;map00330;map01230;map00332;map00970	Metabolic pathways; Biosynthesis of secondary metabolites; ABC transporters; Arginine and proline metabolism; Biosynthesis of amino acids; Carbapenem biosynthesis; Aminoacyl-tRNA biosynthesis	Metabolism;Metabolism;Environmental Information Processing;Metabolism;Metabolism;Metabolism;Genetic Information Processing	Global and overview maps;Global and overview maps;Membrane transport;Amino acid metabolism;Global and overview maps;Biosynthesis of other secondary metabolites;Translation		Organic acids and derivatives	Carboxylic acids and derivatives	Amino acids, peptides, and analogues	M+H, 2M+H
metab_743	388.16	0.762217	Isopentenyl-Adenine-9-glucoside	-	-	-	-	C16H23N5O5	-	-	-	-	-	-	-	-		-	-	-	M+Na, M+CH3OH+H
metab_767	418.17	0.831883	(Z)-3-(1-Formyl-1-propenyl)pentanedioic acid	HMDB0033091	(Z)-3-(1-Formyl-1-propenyl)pentanedioic acid	200.068	-	C9H12O5	-	-	-	-	-	-	-	-		Lipids and lipid-like molecules	Fatty Acyls	Fatty acids and conjugates	M+H-H2O, 2M+NH4
metab_804	118.086	1.09415	L-Valine	HMDB0000883	L-Valine	117.079	72-18-4	C5H11NO2	C00183	L-Valine;2-Amino-3-methylbutyric acid	Peptides	Amino acids	map01100;map00311;map00280;map00290;map01210;map02010;map01230;map00966;map00460;map01110;map00970;map00770	Metabolic pathways; Penicillin and cephalosporin biosynthesis; Valine, leucine and isoleucine degradation; Valine, leucine and isoleucine biosynthesis; 2-Oxocarboxylic acid metabolism; ABC transporters; Biosynthesis of amino acids; Glucosinolate biosynthesis; Cyanoamino acid metabolism; Biosynthesis of secondary metabolites; Aminoacyl-tRNA biosynthesis; Pantothenate and CoA biosynthesis	Metabolism;Metabolism;Metabolism;Metabolism;Metabolism;Environmental Information Processing;Metabolism;Metabolism;Metabolism;Metabolism;Genetic Information Processing;Metabolism	Global and overview maps;Biosynthesis of other secondary metabolites;Amino acid metabolism;Amino acid metabolism;Global and overview maps;Membrane transport;Global and overview maps;Biosynthesis of other secondary metabolites;Metabolism of other amino acids;Global and overview maps;Translation;Metabolism of cofactors and vitamins		Organic acids and derivatives	Carboxylic acids and derivatives	Amino acids, peptides, and analogues	M+H, 2M+Na
metab_827	150.058	1.193	THTC	-	-	-	-	C5H8O2S	C11074	THTC;2-n-Tetrahydrothiophenecarboxylic acid	-	-	-	-	-	-		-	-	-	M+H, M+NH4
metab_841	232.118	1.21643	Isovalerylglutamic acid	HMDB0000726	Isovalerylglutamic acid	231.111	80154-63-8	C10H17NO5	-	-	-	-	-	-	-	-		Organic acids and derivatives	Carboxylic acids and derivatives	Amino acids, peptides, and analogues	M+H-H2O, M+H
metab_855	175.024	1.28398	Citric acid	HMDB0000094	Citric acid	192.027	77-92-9	C6H8O7	C00158	Citrate;Citric acid;2-Hydroxy-1,2,3-propanetricarboxylic acid;2-Hydroxytricarballylic acid	Organic acids	Carboxylic acids	map01100;map00630;map01110;map01210;map01200;map01230;map00250;map00020	Metabolic pathways; Glyoxylate and dicarboxylate metabolism; Biosynthesis of secondary metabolites; 2-Oxocarboxylic acid metabolism; Carbon metabolism; Biosynthesis of amino acids; Alanine, aspartate and glutamate metabolism; Citrate cycle (TCA cycle)	Metabolism;Metabolism;Metabolism;Metabolism;Metabolism;Metabolism;Metabolism;Metabolism	Global and overview maps;Carbohydrate metabolism;Global and overview maps;Global and overview maps;Global and overview maps;Global and overview maps;Amino acid metabolism;Carbohydrate metabolism		Organic acids and derivatives	Carboxylic acids and derivatives	Tricarboxylic acids and derivatives	M+H, M+H-H2O
metab_863	89.0423	1.33838	Cis-2,3-Dimethylthiirane	HMDB0039807	cis-2,3-Dimethylthiirane	88.0347	5954-71-2	C4H8S	-	-	-	-	-	-	-	-		Organoheterocyclic compounds	Thiiranes	Not Available	M+H, M+NH4
metab_873	846.308	1.37668	Dp5	-	-	-	-	C30H52O26	-	-	-	-	-	-	-	-		-	-	-	M+NH4, M+Na
metab_882	170.081	1.46362	Pyridoxine (Vitamin B6)	-	-	-	-	C8H11NO3	-	-	-	-	-	-	-	-		-	-	-	M+H-H2O, M+H
metab_887	190.107	1.51707	3-[(E)-prop-1-enyl]pentanedioic acid	-	-	-	-	C8H12O4	-	-	-	-	-	-	-	-		-	-	-	M+NH4, M+ACN+H
metab_896	351.176	1.59328	Arginyl-Hydroxyproline	HMDB0028710	Arginylhydroxyproline	287.159	-	C11H21N5O4	-	-	-	-	-	-	-	-		Organic acids and derivatives	Carboxylic acids and derivatives	Amino acids, peptides, and analogues	M+H-H2O, M+ACN+Na
metab_918	136.076	1.88062	Benzofuran	HMDB0032929	Benzofuran	118.042	271-89-6	C8H6O	C14512	Benzofuran	-	-	-	-	-	-		Organoheterocyclic compounds	Benzofurans	Not Available	M+H, M+NH4
metab_930	212.091	2.06495	Castanospermine	-	-	-	-	C8H15NO4	C02256	Castanospermine	-	-	-	-	-	-		-	-	-	M+H, M+Na
metab_937	121.065	2.15977	Phenylacetaldehyde	HMDB0006236;HMDB0041610	Phenylacetaldehyde;(2,2-Diethoxyethyl)benzene	120.057514878;194.13067982	122-78-1	C8H8O	C00601	Phenylacetaldehyde;alpha-Tolualdehyde	-	-	map01100;map00360	Metabolic pathways; Phenylalanine metabolism	Metabolism;Metabolism	Global and overview maps;Amino acid metabolism		Benzenoids	Benzene and substituted derivatives	Phenylacetaldehydes	M+H, M+NH4
metab_938	188.092	1.26297	(5S,6S)-6-Amino-5-hydroxycyclohexane-1,3-diene-1-carboxyate	-	-	-	-	C7H9NO3	-	-	-	-	-	-	-	-		-	-	-	M+H, M+CH3OH+H
metab_942	174.112	1.25795	Isovalerylalanine	HMDB0000747	Isovalerylalanine	173.105	68219-63-6	C8H15NO3	-	-	-	-	-	-	-	-		Organic acids and derivatives	Carboxylic acids and derivatives	Amino acids, peptides, and analogues	M+H, M+Na
metab_946	168.065	1.24493	3alpha,4,5,7alpha-Tetrahydro-5-hydroxy-1H-isoindole-1,3(2H)-dione	HMDB0034887	3alpha,4,5,7alpha-Tetrahydro-5-hydroxy-1H-isoindole-1,3(2H)-dione	167.058	-	C8H9NO3	-	-	-	-	-	-	-	-		Organoheterocyclic compounds	Isoindoles and derivatives	Isoindolines	M+H, M+CH3OH+H
metab_961	284.112	1.20252	4-Hydroxy-3-methoxy-cinnamoylglycine	HMDB0059747	4-Hydroxy-3-methoxy-cinnamoylglycine	251.079	-	C12H13NO5	C02564	N-Feruloylglycine;N-[3-(4-Hydroxy-3-methoxyphenyl)-1-oxo-2-propen-1-yl]glycine	-	-	-	-	-	-		Organic acids and derivatives	Carboxylic acids and derivatives	Amino acids, peptides, and analogues	M+NH4, M+CH3OH+H
metab_1010	212.092	2.6984	6-Maleimidocaproic acid	-	-	-	-	C10H13NO4	-	-	-	-	-	-	-	-		-	-	-	M+H, M+CH3OH+H
metab_1022	432.186	2.7373	S-Adenosylmethionine	HMDB0001185	S-Adenosylmethionine	399.145	485-80-3	C15H23N6O5S+	C00019	S-Adenosyl-L-methionine;S-Adenosylmethionine;AdoMet;SAM	Vitamins and Cofactors	Cofactors	map01100;map01110;map00908;map00270;map00330;map01230;map00261;map04122	Metabolic pathways; Biosynthesis of secondary metabolites; Zeatin biosynthesis; Cysteine and methionine metabolism; Arginine and proline metabolism; Biosynthesis of amino acids; Monobactam biosynthesis; Sulfur relay system	Metabolism;Metabolism;Metabolism;Metabolism;Metabolism;Metabolism;Metabolism;Genetic Information Processing	Global and overview maps;Global and overview maps;Metabolism of terpenoids and polyketides;Amino acid metabolism;Amino acid metabolism;Global and overview maps;Biosynthesis of other secondary metabolites;Folding, sorting and degradation		Nucleosides, nucleotides, and analogues	5'-deoxyribonucleosides	5'-deoxy-5'-thionucleosides	M+H-2H2O, M+CH3OH+H
metab_1028	229.118	2.75012	Hydroxyprolyl-Proline	HMDB0028871	Hydroxyprolyl-Proline	228.111	-	C10H16N2O4	-	-	-	-	-	-	-	-		Organic acids and derivatives	Carboxylic acids and derivatives	Amino acids, peptides, and analogues	M+H, M+Na
metab_1064	237.087	2.91137	L-Agaridoxin	HMDB0029445	L-Agaridoxin	254.09	-	C11H14N2O5	-	-	-	-	-	-	-	-		Organic acids and derivatives	Carboxylic acids and derivatives	Amino acids, peptides, and analogues	M+H-H2O, M+Na
metab_1072	327.049	2.96618	4H-Pyran-4-one, 3-(beta-D-glucopyranosyloxy)-2-methyl-	-	-	-	-	C12H16O8	-	-	-	-	-	-	-	-		-	-	-	M+Na, M+K
metab_1077	398.144	2.98748	4-Hydroxyvoriconazole	HMDB0060894	4-Hydroxyvoriconazole	365.11	-	C16H14F3N5O2	-	-	-	-	-	-	-	-		Benzenoids	Benzene and substituted derivatives	Phenylpropanes	M+CH3OH+H, M+ACN+H
metab_1081	276.107	3.00727	Sarmentosin	HMDB0030697	Sarmentosin	275.101	71933-54-5	C11H17NO7	C08340	Sarmentosin;2-Butenenitrile,4-(beta-D-glucopyranosyloxy)-2-(hydroxymethyl)-, (E)-	-	-	-	-	-	-		Lipids and lipid-like molecules	Fatty Acyls	Fatty acyl glycosides	M+H, M+Na
metab_1089	256.129	3.04837	4-Hydroxy-4-(methylnitrosoamino)-1-(3-pyridinyl)-1-butanone	HMDB0062404	4-Hydroxy-4-(methylnitrosoamino)-1-(3-pyridinyl)-1-butanone	223.096	-	C10H13N3O3	C19566	4-Hydroxy-4-(methylnitrosoamino)-1-(3-pyridinyl)-1-butanone	-	-	-	-	-	-		Organic oxygen compounds	Organooxygen compounds	Carbonyl compounds	M+CH3OH+H, M+ACN+Na
metab_1093	479.187	3.07062	6-(3-hydroxybutan-2-yl)-5-(hydroxymethyl)-4-methoxypyran-2-one	-	-	-	-	C11H16O5	-	-	-	-	-	-	-	-		-	-	-	M+H-H2O, 2M+Na
metab_1099	208.097	3.10298	Indol-3-acetic acid	-	-	-	-	C10H9NO2	-	-	-	-	-	-	-	-		-	-	-	M+NH4, M+CH3OH+H
metab_1115	312.144	3.18483	3-Methylglutarylcarnitine	HMDB0000552	3-Methylglutarylcarnitine	289.153	102673-95-0	C13H23NO6	-	-	-	-	-	-	-	-		Lipids and lipid-like molecules	Fatty Acyls	Fatty acid esters	M+H, M+Na
metab_1119	355.099	3.21148	Leonuriside A	HMDB0031721	Leonuriside A	332.111	121748-12-7	C14H20O9	-	-	-	-	-	-	-	-		Organic oxygen compounds	Organooxygen compounds	Carbohydrates and carbohydrate conjugates	M+Na, M+K
metab_1146	155.07	3.39675	2,6-Dimethoxyphenol	HMDB0034158	2,6-Dimethoxyphenol	154.063	1991-10-01	C8H10O3	C10787	2,6-Dimethoxyphenol;Pyrogallol 1,3-dimethyl ether	-	-	-	-	-	-		Benzenoids	Phenols	Methoxyphenols	M+H, 2M+NH4
metab_1176	238.071	3.56873	Caramboxin	-	-	-	-	C11H13NO6	-	-	-	-	-	-	-	-		-	-	-	M+H-H2O, M+Na
metab_1178	187.086	3.57755	1-Methoxy-1H-indole-3-acetonitrile	HMDB0040973	1-Methoxy-1H-indole-3-acetonitrile	186.079	30536-48-2	C11H10N2O	-	-	-	-	-	-	-	-		Organoheterocyclic compounds	Indoles and derivatives	Indoles	M+H, 2M+K
metab_1219	239.102	3.8136	Sakacin P	HMDB0038239;LMFA08010024	Sakacin P	216.111	146240-19-9	C9H16N2O4	-	-	-	-	-	-	-	-		Lipids and lipid-like molecules	Fatty Acyls	Fatty amides	M+Na, 2M+Na
metab_1248	398.144	4.0202	Simmondsin	HMDB0030394	Simmondsin	375.153	51771-52-9	C16H25NO9	-	-	-	-	-	-	-	-		Organic oxygen compounds	Organooxygen compounds	Carbohydrates and carbohydrate conjugates	M+H, M+Na
metab_1263	709.267	4.09303	Seco-isolariciresinol diglucoside	-	-	-	-	C32H46O16	-	-	-	-	-	-	-	-		-	-	-	M+NH4, M+Na
metab_1284	137.06	4.24258	P-Anisaldehyde	HMDB0029686;MJDBOTE0001725	4-Methoxybenzaldehyde	136.052	-	C8H8O2	C10761	p-Anisaldehyde	-	-	-	-	-	-		Benzenoids	Benzene and substituted derivatives	Benzoyl derivatives	M+H, 2M+H
metab_1310	309.096	4.39457	Beta-D-Glucopyranose, 1-O-[(2E)-3-(2-hydroxyphenyl)-1-oxo-2-propen-1-yl]-	-	-	-	-	C15H18O8	-	-	-	-	-	-	-	-		-	-	-	M+H-H2O, M+Na
metab_1318	325.139	4.44062	DHAP(10:0)	HMDB0011675	DHAP(10:0)	324.134	-	C13H25O7P	-	-	-	-	-	-	-	-		Organic oxygen compounds	Organooxygen compounds	Carbonyl compounds	M+H, M+Na
metab_1319	136.076	4.44742	PHENACYLAMINE	HMDB0032628	2-Aminoacetophenone	135.068	613-89-8	C8H9NO	-	-	-	-	-	-	-	-		Organic oxygen compounds	Organooxygen compounds	Carbonyl compounds	M+H, M+NH4
metab_1328	222.076	4.51973	Isopropylmaleate	HMDB0012241	Isopropylmaleic acid	158.058	-	C7H10O4	C02631	2-Isopropylmaleate;beta-Isopropylmaleate	-	-	map01210;map01110;map00290	2-Oxocarboxylic acid metabolism; Biosynthesis of secondary metabolites; Valine, leucine and isoleucine biosynthesis	Metabolism;Metabolism;Metabolism	Global and overview maps;Global and overview maps;Amino acid metabolism		Lipids and lipid-like molecules	Fatty Acyls	Fatty acids and conjugates	M+H-H2O, M+ACN+Na
metab_1329	169.049	4.5265	Erinapyrone C	HMDB0041026	Erinapyrone C	186.053	157207-53-9	C8H10O5	-	-	-	-	-	-	-	-		Organoheterocyclic compounds	Pyrans	Pyranones and derivatives	M+H-H2O, M+H
metab_1331	203.179	4.54028	Caryophyllene epoxide	HMDB0036789	Caryophyllene alpha-oxide	220.183	-	C15H24O	C16908	Caryophyllene epoxide;Caryophyllene oxide	-	-	-	-	-	-		Lipids and lipid-like molecules	Prenol lipids	Sesquiterpenoids	M+H-H2O, M+H
metab_1350	301.118	4.63602	N-Acetyl-O-methyltyrosine	-	-	-	-	C12H15NO4	-	-	-	-	-	-	-	-		-	-	-	M+H-H2O, M+ACN+Na
metab_1360	481.097	4.74032	Myricetin 3-glucoside	LMPK12112420			-	C21H20O13	-	-	-	-	-	-	-	-		-	-	-	M+H, M+Na
metab_1361	317.029	4.74403	3,3',4',5,6,7,8-Heptahydroxyflavone	HMDB0030159	3,3',4',5,6,7,8-Heptahydroxyflavone	334.032	87926-83-8	C15H10O9	-	-	-	-	-	-	-	-		Phenylpropanoids and polyketides	Flavonoids	Flavones	M+H-H2O, M+H
metab_1381	303.122	4.88687	(2R,3R,4S,5S,6R)-2-hexoxy-6-(hydroxymethyl)oxane-3,4,5-triol	-	-	-	-	C12H24O6	-	-	-	-	-	-	-	-		-	-	-	M+K, M+2Na-H
metab_1403	147.044	5.04258	2-Oxo-3-phenylpropanoic acid	HMDB0000205;MJDBOTE0000608	Phenylpyruvic acid	164.047	156-06-9	C9H8O3	C00166	Phenylpyruvate;Phenylpyruvic acid;alpha-Ketohydrocinnamic acid;keto-Phenylpyruvate;3-Phenyl-2-oxopropanoate;2-Oxo-3-phenylpropanoate	-	-	map01100;map01110;map01210;map00960;map01230;map00360;map00400	Metabolic pathways; Biosynthesis of secondary metabolites; 2-Oxocarboxylic acid metabolism; Tropane, piperidine and pyridine alkaloid biosynthesis; Biosynthesis of amino acids; Phenylalanine metabolism; Phenylalanine, tyrosine and tryptophan biosynthesis	Metabolism;Metabolism;Metabolism;Metabolism;Metabolism;Metabolism;Metabolism	Global and overview maps;Global and overview maps;Global and overview maps;Biosynthesis of other secondary metabolites;Global and overview maps;Amino acid metabolism;Amino acid metabolism		Benzenoids	Benzene and substituted derivatives	Phenylpyruvic acid derivatives	M+H-H2O, M+ACN+H
metab_1405	309.096	5.04258	4R,5R,6S-Trihydroxy-2-hydroxymethyl-2-cyclohexen-1-one 6-(2-hydroxy-6-methylbenzoate)	HMDB0040692	4R,5R,6S-Trihydroxy-2-hydroxymethyl-2-cyclohexen-1-one 6-(2-hydroxy-6-methylbenzoate)	308.09	146475-71-0	C15H16O7	-	-	-	-	-	-	-	-		Benzenoids	Benzene and substituted derivatives	Benzoic acids and derivatives	M+H-H2O, M+H
metab_1413	247.133	5.08603	Desmotroposantonin	-	-	-	-	C15H18O3	-	-	-	-	-	-	-	-		-	-	-	M+H-H2O, M+H
metab_1436	625.176	5.23353	Isorhamnetin-3-O-rutinoside	-	-	-	-	C28H32O16	-	-	-	-	-	-	-	-		-	-	-	M+H, M+Na
metab_1448	327.122	5.31372	3-Hydroxytanshinone IIB	-	-	-	-	C19H18O5	-	-	-	-	-	-	-	-		-	-	-	M+H-H2O, M+H
metab_1449	317.138	5.30992	Epiafzelechin Trimethyl Ether	-	-	-	-	C18H20O5	-	-	-	-	-	-	-	-		-	-	-	M+H-H2O, M+H
metab_1493	527.246	5.62292	Isoleucyl-Hydroxyproline	HMDB0028908	Isoleucylhydroxyproline	244.142	-	C11H20N2O4	-	-	-	-	-	-	-	-		Organic acids and derivatives	Carboxylic acids and derivatives	Amino acids, peptides, and analogues	M+K, 2M+K
metab_1498	220.133	5.61227	Ritalinic acid	HMDB0042008	Ritalinic acid	219.126	19395-41-6	C13H17NO2	-	-	-	-	-	-	-	-		Organic nitrogen compounds	Organonitrogen compounds	Amines	M+H-H2O, M+H
metab_1554	523.144	6.02222	Centaurein	LMPK12112933			-	C24H26O13	-	-	-	-	-	-	-	-		-	-	-	M+H, M+Na
metab_1563	219.101	6.05015	(R)-Bitalin A	HMDB0040358	(R)-Bitalin A	218.094	35844-67-8	C13H14O3	-	-	-	-	-	-	-	-		Benzenoids	Benzene and substituted derivatives	Acetophenones	M+H-H2O, M+H
metab_1573	308.221	6.09757	Myristoylglycine	HMDB0013250	Myristoylglycine	285.23	-	C16H31NO3	-	-	-	-	-	-	-	-		Organic acids and derivatives	Carboxylic acids and derivatives	Amino acids, peptides, and analogues	M+H, M+Na
metab_1575	306.206	6.10112	N-Jasmonoylisoleucine	HMDB0029391	N-Jasmonoylisoleucine	323.21	120330-93-0	C18H29NO4	C18699	(-)-Jasmonoyl-L-isoleucine;(-)-JA-L-Ile	-	-	map04075	Plant hormone signal transduction	Environmental Information Processing	Signal transduction		Organic acids and derivatives	Carboxylic acids and derivatives	Amino acids, peptides, and analogues	M+H-H2O, M+CH3OH+H
metab_1585	343.117	6.12173	UWM6	-	-	-	-	C19H18O6	C18678	UWM6	-	-	map01110	Biosynthesis of secondary metabolites	Metabolism	Global and overview maps		-	-	-	M+CH3OH+H, M+H
metab_1592	203.143	6.13978	1,4,6-Trimethylnaphthalene	-	-	-	-	C13H14	-	-	-	-	-	-	-	-		-	-	-	M+H, M+CH3OH+H
metab_1607	357.133	6.18093	Fibleucin	-	-	-	-	C20H20O6	-	-	-	-	-	-	-	-		-	-	-	M+H-2H2O, M+H
metab_1608	355.117	6.18093	Trans-piceid	HMDB0030564	trans-Piceid	390.131	27208-80-6	C20H22O8	C10275	Piceid;Polydatin;3,4,5-Trihydroxystilbene-3-beta-monoglucoside	-	-	-	-	-	-		Phenylpropanoids and polyketides	Stilbenes	Stilbene glycosides	M+H-2H2O, M+H
metab_1620	275.2	6.19752	13-epi-12-oxo Phytodienoic Acid	-	-	-	-	C18H28O3	-	-	-	-	-	-	-	-		-	-	-	M+H-H2O, M+H
metab_1623	546.196	6.19752	Tremulacin	-	-	-	-	C27H28O11	C09973	Tremulacin	-	-	-	-	-	-		-	-	-	M+NH4, M+Na
metab_1648	280.263	6.2828	Palmitoleoyl Ethanolamide	HMDB0013648	Palmitoleoylethanolamde	297.267	-	C18H35NO2	-	-	-	-	-	-	-	-		Organic nitrogen compounds	Organonitrogen compounds	Amines	M+H-H2O, M+Na
metab_1650	258.076	6.28935	(3S,4S)-4,8-dihydroxy-3-methyl-3,4-dihydroisochromen-1-one	-	-	-	-	C10H10O4	-	-	-	-	-	-	-	-		-	-	-	M+H, M+ACN+Na
metab_1655	398.289	6.30035	AMP-Deoxynojirimycin	-	-	-	-	C22H39NO5	-	-	-	-	-	-	-	-		-	-	-	M+H, M+Na
metab_1657	536.334	6.30387	Veratrosine	-	-	-	-	C33H49NO7	-	-	-	-	-	-	-	-		-	-	-	M+H-2H2O, M+CH3OH+H
metab_1667	109.065	6.34748	Xi-4-Hydroxy-4-methyl-2-cyclohexen-1-one	HMDB0033629	xi-4-Hydroxy-4-methyl-2-cyclohexen-1-one	126.068	-	C7H10O2	-	-	-	-	-	-	-	-		Organic oxygen compounds	Organooxygen compounds	Carbonyl compounds	M+H-H2O, 2M+ACN+H
metab_1711	273.184	6.52382	6,9,12-hexadecatrienoic acid	LMFA01030136;LMFA01031092			-	C16H26O2	-	-	-	-	-	-	-	-		-	-	-	M+H, M+Na
metab_1719	518.324	6.57477	PC(18:3(6Z,9Z,12Z)/0:0)[U]	-	-	-	-	C26H48NO7P	-	-	-	-	-	-	-	-		-	-	-	M+H, M+Na
metab_1721	532.29	6.59628	Iso-Roridine	-	-	-	-	C29H38O8	-	-	-	-	-	-	-	-		-	-	-	M+NH4, M+Na
metab_1732	194.081	6.69242	2,8-Quinolinediol	HMDB0240311	2,8-Quinolinediol	161.048	15450-76-7	C9H7NO2	C06342	Quinolin-2,8-diol	-	-	-	-	-	-		Organoheterocyclic compounds	Quinolines and derivatives	Quinolones and derivatives	M+H, M+CH3OH+H
metab_1736	515.335	6.69595	Homodolicholide	HMDB0033907	Homodolicholide	492.345	86630-40-2	C29H48O6	-	-	-	-	-	-	-	-		Organoheterocyclic compounds	Benzopyrans	1-benzopyrans	M+NH4, M+Na
metab_1748	703.386	6.75703	Gingerglycolipid C	HMDB0041095;LMGL04010018	Gingerglycolipid C	680.398	35949-86-1	C33H60O14	-	-	-	-	-	-	-	-		Lipids and lipid-like molecules	Glycerolipids	Glycosylglycerols	M+NH4, M+Na
metab_1769	497.287	6.87147	Pubescenol	LMPR0104300001;HMDB0030085	Pubescenol	474.298	90685-93-1	C28H42O6	-	-	-	-	-	-	-	-		Lipids and lipid-like molecules	Steroids and steroid derivatives	Steroid lactones	M+H, M+Na
metab_1810	309.242	7.10108	19-Nor-5-androstenediol	HMDB0004590;LMST02010050	19-Nor-5-androstenediol	276.209	25975-59-1	C18H28O2	-	-	-	-	-	-	-	-		Lipids and lipid-like molecules	Steroids and steroid derivatives	Estrane steroids	M+H-H2O, M+CH3OH+H
metab_1816	341.283	7.14668	Tetracosapentaenoic acid (24:5n-3)	HMDB0006323	Tetracosapentaenoic acid (24:5n-3)	358.287	-	C24H38O2	-	-	-	-	-	-	-	-		Lipids and lipid-like molecules	Fatty Acyls	Fatty acids and conjugates	M+H-H2O, M+H
metab_1871	170.154	7.35288	(S)-(-)-Perillyl alcohol	HMDB0003634	Perillyl alcohol	152.12	-	C10H16O	C02452	(-)-Perillyl alcohol;Perillyl alcohol;(S)-Perillyl alcohol;[(4S)-4-(Prop-1-en-2-yl)cyclohex-1-en-1-yl]methanol;p-Mentha-1,8-dien-7-ol;(-)-Perillylalcohol	-	-	map01110;map00903;map00902	Biosynthesis of secondary metabolites; Limonene and pinene degradation; Monoterpenoid biosynthesis	Metabolism;Metabolism;Metabolism	Global and overview maps;Metabolism of terpenoids and polyketides;Metabolism of terpenoids and polyketides		Lipids and lipid-like molecules	Prenol lipids	Monoterpenoids	M+H-H2O, M+NH4
metab_1918	455.351	7.71247	Alisol B	;MJDBOTE0000252			-	C30H48O4	C17460	Alisol B	-	-	-	-	-	-		-	-	-	M+H-H2O, M+H
metab_1922	441.372	7.75345	3beta-3-Hydroxy-18-lupen-21-one	HMDB0035355	3beta-3-Hydroxy-18-lupen-21-one	440.365	29367-66-6	C30H48O2	-	-	-	-	-	-	-	-		Lipids and lipid-like molecules	Prenol lipids	Triterpenoids	M+H-H2O, M+H
metab_1929	284.294	7.78407	Stearamide	LMFA08010003;HMDB0034146	Octadecanamide	283.288	124-26-5	C18H37NO	C13846	Octadecanamide;Stearamide;Stearic acid amide	-	-	-	-	-	-		Organic acids and derivatives	Carboximidic acids and derivatives	Carboximidic acids	M+H, M+ACN+H
metab_1966	481.366	8.278	(2alpha,3beta)-20(29)-Lupene-2,3,28-triol	HMDB0041183	(2alpha,3beta)-20(29)-Lupene-2,3,28-triol	458.376	169134-54-7	C30H50O3	-	-	-	-	-	-	-	-		Lipids and lipid-like molecules	Prenol lipids	Triterpenoids	M+NH4, M+Na
metab_1977	427.356	8.38152	(6beta,22E)-6-Hydroxystigmasta-4,22-dien-3-one	HMDB0039425	(6beta,22E)-6-Hydroxystigmasta-4,22-dien-3-one	426.35	36450-01-8	C29H46O2	-	-	-	-	-	-	-	-		Lipids and lipid-like molecules	Steroids and steroid derivatives	Stigmastanes and derivatives	M+H, M+Na
metab_1985	429.372	8.59438	1alpha-hydroxy-26,27-dimethylvitamin D3	LMST03020415			-	C29H48O2	-	-	-	-	-	-	-	-		-	-	-	M+H, M+ACN+H
metab_1986	411.361	8.58432	4alpha-Hydroxymethyl-4beta-methyl-5alpha-cholesta-8,24-dien-3beta-ol	LMST01010232;HMDB0062390;HMDB0012170	4|alpha|-hydroxymethyl-4|beta|-methyl-5|alpha|-cholesta-8,24-dien-3|beta|-ol;4alpha-Hydroxymethyl-4beta-methyl-5alpha-cholesta-8,24-dien-3beta-ol	428.365430786;428.36543078	-	C29H48O2	-	-	-	-	-	-	-	-		Lipids and lipid-like molecules	Prenol lipids	Triterpenoids	M+H-H2O, M+Na
metab_1998	425.377	8.71025	Lup-20(29)-ene-3,28-diol, (3beta)-	-	-	-	-	C30H50O2	-	-	-	-	-	-	-	-		-	-	-	M+H-H2O, M+H
metab_2049	95.0607	8.70635	3-Methylpyridazine	-	-	-	-	C5H6N2	-	-	-	-	-	-	-	-		-	-	-	M+H, M+ACN+H
metab_2055	518.492	8.64937	N-[(4E,8E)-1,3-dihydroxyoctadeca-4,8-dien-2-yl]hexadecanamide	HMDB0035480	N-[(4E,8E)-1,3-dihydroxyoctadeca-4,8-dien-2-yl]hexadecanamide	535.496	141980-53-2	C34H65NO3	-	-	-	-	-	-	-	-		Lipids and lipid-like molecules	Sphingolipids	Ceramides	M+H-H2O, M+Na
metab_2080	411.361	7.81902	5-Dehydroavenasterol	HMDB0006852	5-Dehydroavenasterol	410.355	29560-28-9	C29H46O	C15783	5-Dehydroavenasterol	-	-	map01110;map00100	Biosynthesis of secondary metabolites; Steroid biosynthesis	Metabolism;Metabolism	Global and overview maps;Lipid metabolism		Lipids and lipid-like molecules	Steroids and steroid derivatives	Stigmastanes and derivatives	M+H-H2O, M+H
metab_2091	453.334	7.61107	25-methyl-1alpha,26-dihydroxyvitamin D3	LMST03020339			-	C28H46O3	-	-	-	-	-	-	-	-		-	-	-	M+H, M+Na
metab_2093	539.37	7.60347	22-Acetylpriverogenin B	HMDB0034645	22-Acetylpriverogenin B	516.381	26339-94-6	C32H52O5	-	-	-	-	-	-	-	-		Lipids and lipid-like molecules	Prenol lipids	Triterpenoids	M+NH4, M+Na
metab_2135	522.376	7.42563	(1alpha,2alpha,3beta,5xi,9xi,18xi)-1,2,3,19-Tetrahydroxyurs-12-en-28-oic acid	-	-	-	-	C30H48O6	-	-	-	-	-	-	-	-		-	-	-	M+H-H2O, M+NH4
metab_2144	156.138	7.34907	Isophorone	HMDB0031195	3,5,5-Trimethyl-2-cyclohexen-1-one	138.104	78-59-1	C9H14O	C14743	Isophorone;1,1,3-Trimethyl-3-cyclohexene-5-one	-	-	-	-	-	-		Organic oxygen compounds	Organooxygen compounds	Carbonyl compounds	M+H, M+NH4
metab_2196	491.314	7.08077	PA(8:0/14:0)	HMDB0115485	PA(8:0/14:0)	508.317	-	C25H49O8P	-	-	-	-	-	-	-	-		Lipids and lipid-like molecules	Glycerophospholipids	Glycerophosphates	M+H-H2O, M+CH3OH+H
metab_2223	457.331	6.95385	(22S)-1alpha,22,25-trihydroxy-26,27-dimethyl-23,23,24,24-tetradehydrovitamin D3	LMST03020398			-	C29H44O4	-	-	-	-	-	-	-	-		-	-	-	M+H, M+Na
metab_2232	948.498	6.9311	Amphotericin	HMDB0014819	Amphotericin B	923.488	-	C47H75NO17	C06573	Amphotericin B	-	-	-	-	-	-		Organic oxygen compounds	Organooxygen compounds	Carbohydrates and carbohydrate conjugates	M+H, M+Na
metab_2233	417.31	6.9311	(3beta,22E,24R)-Ergosta-4,6,8(14),22-tetraen-3-ol	HMDB0041050	(3beta,22E,24R)-Ergosta-4,6,8(14),22-tetraen-3-ol	394.324	104729-39-7	C28H42O	-	-	-	-	-	-	-	-		Lipids and lipid-like molecules	Steroids and steroid derivatives	Ergostane steroids	M+H, M+Na
metab_2243	563.355	6.89403	3-keto Fusidic acid	HMDB0060745	3-keto Fusidic acid	530.324	-	C31H46O7	-	-	-	-	-	-	-	-		Lipids and lipid-like molecules	Steroids and steroid derivatives	Oxosteroids	M+H, M+CH3OH+H
metab_2244	454.292	6.88752	PE(16:0/0:0)	LMGP02050002;HMDB0011503	LysoPE(16:0/0:0)	453.286	-	C21H44NO7P	-	-	-	-	-	-	-	-		Lipids and lipid-like molecules	Glycerophospholipids	Glycerophosphoethanolamines	M+H, M+Na
metab_2248	298.273	6.87932	3-ketosphingosine	LMSP01010002			-	C18H35NO2	C06121	3-Ketosphingosine	-	-	-	-	-	-		-	-	-	M+H-H2O, M+H
metab_2252	319.19	6.86768	Panaquinquecol 6	HMDB0035500;LMFA07010986	Panaquinquecol 6	318.183	145400-15-3	C19H26O4	-	-	-	-	-	-	-	-		Lipids and lipid-like molecules	Fatty Acyls	Fatty alcohol esters	M+H-H2O, M+H
metab_2321	425.29	6.6864	1b,3a,7a,12a-Tetrahydroxy-5b-cholanoic acid	HMDB0000307	1beta-Hydroxycholic acid	424.282	-	C24H40O6	-	-	-	-	-	-	-	-		Lipids and lipid-like molecules	Steroids and steroid derivatives	Bile acids, alcohols and derivatives	M+H, M+Na
metab_2326	293.211	6.67983	12-OPDA	-	-	-	-	C18H28O3	C01226	12-OPDA;(15Z)-12-Oxophyto-10,15-dienoate;(15Z)-12-Oxophyto-10,15-dienoic acid;9(S),13(S)-12-Oxo-PDA;12-Oxo-10,15(Z)-phytodienoic acid	-	-	map01100;map00592;map01110	Metabolic pathways; alpha-Linolenic acid metabolism; Biosynthesis of secondary metabolites	Metabolism;Metabolism;Metabolism	Global and overview maps;Lipid metabolism;Global and overview maps		-	-	-	M+H, M+2Na-H
metab_2327	247.205	6.66678	Ginsenoyne J	HMDB0040373	Ginsenoyne J	246.198	141947-41-3	C17H26O	-	-	-	-	-	-	-	-		Lipids and lipid-like molecules	Fatty Acyls	Fatty alcohols	M+H-H2O, M+H
metab_2330	459.346	6.66128	13'-Hydroxy-gamma-tocotrienol	HMDB0012562	13'-Hydroxy-gamma-tocotrienol	426.313	-	C28H42O3	-	-	-	-	-	-	-	-		Lipids and lipid-like molecules	Prenol lipids	Quinone and hydroquinone lipids	M+Na, M+CH3OH+H
metab_2338	351.252	6.64623	3,16,17-trihydroxy-17-acetyl-androstane	-	-	-	-	C21H34O4	-	-	-	-	-	-	-	-		-	-	-	M+H-H2O, M+H
metab_2354	277.216	6.60485	9,12-Octadecadiynoic Acid	LMFA01030540			-	C18H28O2	-	-	-	-	-	-	-	-		-	-	-	M+H, 2M+H
metab_2373	323.127	6.58832	N-gamma-Glutamyl-S-allylcysteine	HMDB0031874	N-gamma-Glutamyl-S-allylcysteine	290.094	-	C11H18N2O5S	-	-	-	-	-	-	-	-		Organic acids and derivatives	Carboxylic acids and derivatives	Amino acids, peptides, and analogues	M+H, M+CH3OH+H
metab_2388	293.211	6.57477	11-Oxohexadecanoic acid	HMDB0030978	11-Oxohexadecanoic acid	270.219	2388-81-0	C16H30O3	-	-	-	-	-	-	-	-		Lipids and lipid-like molecules	Fatty Acyls	Fatty acids and conjugates	M+NH4, M+Na
metab_2409	493.279	6.54032	Cyclo(VVFF)	-	-	-	-	C28H36N4O4	-	-	-	-	-	-	-	-		-	-	-	M+H, M+Na
metab_2411	311.221	6.54728	Trans-EKODE-(E)-Ib	-	-	-	-	C18H30O4	-	-	-	-	-	-	-	-		-	-	-	M+H, M+K
metab_2453	333.203	6.46428	7,18-Dihydroxykaurenolide	HMDB0036761	7,18-Dihydroxykaurenolide	332.199	7758-47-6	C20H28O4	-	-	-	-	-	-	-	-		Lipids and lipid-like molecules	Prenol lipids	Terpene lactones	M+H, M+Na
metab_2483	323.127	6.42983	(4E,6E)-2-(hydroxymethyl)-3-(3-methoxy-3-oxopropyl)deca-4,6-dienoic acid	-	-	-	-	C15H24O5	-	-	-	-	-	-	-	-		-	-	-	M+H-H2O, M+K
metab_2488	293.211	6.42385	8-{(1S,5R)-4-Oxo-5-[(2Z)-2-penten-1-yl]-2-cyclopenten-1-yl}octanoic acid	-	-	-	-	C18H28O3	-	-	-	-	-	-	-	-		-	-	-	M+H, M+ACN+H
metab_2516	375.214	6.357	5,8,12-Trihydroxy-9-octadecenoic acid	LMFA01050543;LMFA02000221;HMDB0030936	5,8,12-Trihydroxy-9-octadecenoic acid	330.241	-	C18H34O5	-	-	-	-	-	-	-	-		Lipids and lipid-like molecules	Fatty Acyls	Fatty acids and conjugates	M+ACN+H, M+2Na-H
metab_2519	426.335	6.3515	N-palmitoyl histidine	LMFA08020132			-	C22H39N3O3	-	-	-	-	-	-	-	-		-	-	-	M+H, M+CH3OH+H
metab_2552	361.236	6.31083	(Z)-11beta,21-Dihydroxypregna-1,4,17(20)-trien-3-one	-	-	-	-	C21H28O3	C15303	(Z)-11beta,21-Dihydroxypregna-1,4,17(20)-trien-3-one	-	-	-	-	-	-		-	-	-	M+H, M+CH3OH+H
metab_2556	359.221	6.30387	(卤)12,13-DiHOME	-	-	-	-	C18H34O4	-	-	-	-	-	-	-	-		-	-	-	M+H, M+2Na-H
metab_2559	255.076	6.30035	(2-oxo-2,3-dihydro-1H-indol-3-yl)acetic acid	-	-	-	-	C10H9NO3	-	-	-	-	-	-	-	-		-	-	-	M+CH3OH+H, M+ACN+Na
metab_2630	385.127	6.16733	S-Adenosyl-L-homocysteine	HMDB0000939	S-Adenosylhomocysteine	384.122	979-92-0	C14H20N6O5S	C00021	S-Adenosyl-L-homocysteine;S-Adenosylhomocysteine	-	-	map01100;map00270;map01230	Metabolic pathways; Cysteine and methionine metabolism; Biosynthesis of amino acids	Metabolism;Metabolism;Metabolism	Global and overview maps;Amino acid metabolism;Global and overview maps		Nucleosides, nucleotides, and analogues	5'-deoxyribonucleosides	5'-deoxy-5'-thionucleosides	M+H-H2O, M+H
metab_2674	407.133	6.11522	Beta-D-Glucopyranoside, 4-hydroxy-2-(hydroxymethyl)phenyl, 6-benzoate	-	-	-	-	C20H22O9	-	-	-	-	-	-	-	-		-	-	-	M+H, M+Na
metab_2689	359.148	6.10467	1-[(Z)-but-2-en-2-yl]-3,9-dihydroxy-4,7-dimethylbenzo[b][1,4]benzodioxepin-6-one	-	-	-	-	C19H18O5	-	-	-	-	-	-	-	-		-	-	-	M+Na, M+CH3OH+H
metab_2692	549.211	6.10112	[(16R)-5,7-dihydroxy-8,8,12,16-tetramethyl-3-[1-(2-methyl-1,3-thiazol-4-yl)prop-1-en-2-yl]-10-methylidene-9-oxo-17-oxa-4-azabicyclo[14.1.0]heptadec-4-en-11-yl]oxidanesulfonic acid	HMDB0127601	[(16R)-5,7-dihydroxy-8,8,12,16-tetramethyl-3-[1-(2-methyl-1,3-thiazol-4-yl)prop-1-en-2-yl]-10-methylidene-9-oxo-17-oxa-4-azabicyclo[14.1.0]heptadec-4-en-11-yl]oxidanesulfonic acid	584.223	-	C27H40N2O8S2	-	-	-	-	-	-	-	-		Organoheterocyclic compounds	Azoles	Thiazoles	M+H-2H2O, M+Na
metab_2706	208.097	6.0911	N-Acetylphenylalanine	HMDB0000512	N-Acetyl-L-phenylalanine	207.09	-	C11H13NO3	C03519	N-Acetyl-L-phenylalanine	-	-	map01100;map00360	Metabolic pathways; Phenylalanine metabolism	Metabolism;Metabolism	Global and overview maps;Amino acid metabolism		Organic acids and derivatives	Carboxylic acids and derivatives	Amino acids, peptides, and analogues	M+H-H2O, M+H
metab_2716	413.12	6.07423	Beta-D-Glucopyranoside, 2-(hydroxymethyl)phenyl, 6-benzoate	-	-	-	-	C20H22O8	-	-	-	-	-	-	-	-		-	-	-	M+NH4, M+Na
metab_2756	195.101	5.95337	Methoxyeugenol	HMDB0041194	Methoxyeugenol	194.094	6627-88-9	C11H14O3	-	-	-	-	-	-	-	-		Benzenoids	Phenols	Methoxyphenols	M+H, M+NH4
metab_2759	245.138	5.94993	Polyethylene, oxidized	HMDB0032472	Polyethylene, oxidized	244.131	68441-17-8	C12H20O5	-	-	-	-	-	-	-	-		Organic acids and derivatives	Keto acids and derivatives	Medium-chain keto acids and derivatives	M+H, M+NH4
metab_2783	247.132	5.83587	Loxoprofen	HMDB0041920	Loxoprofen	246.126	80382-23-6	C15H18O3	-	-	-	-	-	-	-	-		Phenylpropanoids and polyketides	Phenylpropanoic acids	Not Available	M+H-H2O, M+H
metab_2796	509.128	5.6644	Syringetin 3-glucoside	LMPK12112488			-	C23H24O13	-	-	-	-	-	-	-	-		-	-	-	M+H, M+Na
metab_2802	347.148	5.65773	Isotaxiresinol	-	-	-	-	C19H22O6	-	-	-	-	-	-	-	-		-	-	-	M+H-H2O, M+H
metab_2806	187.075	5.60248	2-Methyl-6-phenyl-4H-pyran-4-one	-	-	-	-	C12H10O2	-	-	-	-	-	-	-	-		-	-	-	M+H, M+NH4
metab_2810	555.174	5.56523	Lippioside II	HMDB0034268	Lippioside II	554.164	220271-94-3	C25H30O14	-	-	-	-	-	-	-	-		Lipids and lipid-like molecules	Prenol lipids	Terpene glycosides	M+H, M+K
metab_2830	463.123	5.42235	Peonidin 3-O-glucoside	HMDB0013689	Peonidin-3-glucoside	463.124	-	C22H22O11	C12141	Peonidin 3-O-glucoside;Peonidin-3-glucoside	-	-	map00942	Anthocyanin biosynthesis	Metabolism	Biosynthesis of other secondary metabolites		Phenylpropanoids and polyketides	Flavonoids	Flavonoid glycosides	M+H, M+Na
metab_2844	181.101	5.38723	O-Methylbenzhydrol	-	-	-	-	C14H14O	-	-	-	-	-	-	-	-		-	-	-	M+H-H2O, M+ACN+H
metab_2845	157.065	5.38723	3-Phenylpropanal	HMDB0033716	3-Phenylpropanal	134.073	104-53-0	C9H10O	-	-	-	-	-	-	-	-		Benzenoids	Benzene and substituted derivatives	Not Available	M+H-H2O, M+Na
metab_2848	177.054	5.36818	Ferulic acid	HMDB0125096;HMDB0000954	3-(4-hydroxy-3-methoxyphenyl)prop-2-enoic acid;Ferulic acid	194.057908802;194.057908808	537-98-4	C10H10O4	C01494	Ferulate;Ferulic acid;4-Hydroxy-3-methoxycinnamic acid;3-Methoxy-4-hydroxy-trans-cinnamate;4-Hydroxy-3-methoxycinnamate	-	-	map01100;map00940;map01110	Metabolic pathways; Phenylpropanoid biosynthesis; Biosynthesis of secondary metabolites	Metabolism;Metabolism;Metabolism	Global and overview maps;Biosynthesis of other secondary metabolites;Global and overview maps		Phenylpropanoids and polyketides	Cinnamic acids and derivatives	Hydroxycinnamic acids and derivatives	M+H-H2O, M+H
metab_2878	595.165	5.13615	Datiscetin-3-O-rutinoside	-	-	-	-	C27H30O15	-	-	-	-	-	-	-	-		-	-	-	M+H, M+Na
metab_2903	227.127	4.85183	Epi-4'-hydroxyjasmonic acid	LMFA02020008			-	C12H18O4	-	-	-	-	-	-	-	-		-	-	-	M+H-H2O, M+H
metab_2915	307.115	4.66002	Cimifugin	;MJDBOTE0000241			-	C16H18O6	C09000	Cimifugin	-	-	-	-	-	-		-	-	-	M+H, M+Na
metab_2917	219.138	4.6496	Eremopetasidione	HMDB0040778	Eremopetasidione	236.141	163135-94-2	C14H20O3	-	-	-	-	-	-	-	-		Lipids and lipid-like molecules	Prenol lipids	Sesquiterpenoids	M+H-H2O, M+H
metab_2921	538.228	4.5882	(2S,3R)-3-hydroxy-4-methoxy-2-(2-phenylethyl)-2,3-dihydropyran-6-one	-	-	-	-	C14H16O4	-	-	-	-	-	-	-	-		-	-	-	M+H-H2O, 2M+ACN+H
metab_2924	193.086	4.5882	2,6-Dihydroxynaphthalene	-	-	-	-	C10H8O2	-	-	-	-	-	-	-	-		-	-	-	M+H, M+CH3OH+H
metab_2925	133.065	4.5882	Cinnamaldehyde	HMDB0003441	Cinnamaldehyde	132.058	104-55-2	C9H8O	C00903	Cinnamaldehyde	-	-	map01100;map00940;map01110	Metabolic pathways; Phenylpropanoid biosynthesis; Biosynthesis of secondary metabolites	Metabolism;Metabolism;Metabolism	Global and overview maps;Biosynthesis of other secondary metabolites;Global and overview maps		Phenylpropanoids and polyketides	Cinnamaldehydes	Not Available	M+H-H2O, M+H
metab_2965	256.118	4.28787	N-D-Glucosylarylamine	-	-	-	-	C12H17NO5	C03142	N-D-Glucosylarylamine	-	-	-	-	-	-		-	-	-	M+H, M+CH3OH+H
metab_2982	306.144	4.12542	3-Carboxy-2,3,4,9-tetrahydro-1H-pyrido[3,4-b]indole-1-propanoic acid	HMDB0034881	3-Carboxy-2,3,4,9-tetrahydro-1H-pyrido[3,4-b]indole-1-propanoic acid	288.111	-	C15H16N2O4	-	-	-	-	-	-	-	-		Alkaloids and derivatives	Harmala alkaloids	Not Available	M+NH4, M+CH3OH+H
metab_2983	276.134	4.12542	Cyclo(Tyr-Ala)	-	-	-	-	C12H14N2O3	-	-	-	-	-	-	-	-		-	-	-	M+H-2H2O, M+ACN+H
metab_2994	215.106	4.04933	2-Butanone, 4-(6-hydroxy-2-naphthalenyl)-	-	-	-	-	C14H14O2	-	-	-	-	-	-	-	-		-	-	-	M+H-H2O, M+H
metab_3017	171.065	3.82032	3,4-Dihydroxybenzaldehyde	HMDB0059965	3,4-Dihydroxybenzaldehyde	138.032	139-85-5	C7H6O3	C16700	3,4-Dihydroxybenzaldehyde;Protocatechualdehyde	-	-	map00950	Isoquinoline alkaloid biosynthesis	Metabolism	Biosynthesis of other secondary metabolites		Organic oxygen compounds	Organooxygen compounds	Carbonyl compounds	M+H, M+CH3OH+H
metab_3020	427.157	3.80032	Verbasoside	HMDB0039233	Verbasoside	462.174	61548-34-3	C20H30O12	-	-	-	-	-	-	-	-		Organic oxygen compounds	Organooxygen compounds	Carbohydrates and carbohydrate conjugates	M+H-2H2O, M+H
metab_3031	223.107	3.71122	Methyl 1-methoxy-1H-indole-3-carboxylate	HMDB0032755	Methyl 1-methoxy-1H-indole-3-carboxylate	205.074	18377-50-9	C11H11NO3	-	-	-	-	-	-	-	-		Organoheterocyclic compounds	Indoles and derivatives	Indolecarboxylic acids and derivatives	M+H, M+NH4
metab_3038	319.128	3.54808	Fluvoxamino acid	HMDB0060950	fluvoxamino acid	318.119	88699-91-6	C14H17F3N2O3	-	-	-	-	-	-	-	-		Benzenoids	Benzene and substituted derivatives	Trifluoromethylbenzenes	M+H-H2O, M+H
metab_3041	107.049	3.52012	Erinapyrone A	HMDB0041426	Erinapyrone A	142.063	146064-66-6	C7H10O3	-	-	-	-	-	-	-	-		Organoheterocyclic compounds	Pyrans	Pyranones and derivatives	M+H-2H2O, 2M+ACN+H
metab_3051	253.118	3.46608	Methyldopa	HMDB0011754	Methyldopa	211.084	555-30-6	C10H13NO4	C07194	Methyldopa anhydrous;Methyldopa	-	-	-	-	-	-		Phenylpropanoids and polyketides	Phenylpropanoic acids	Not Available	M+H, M+ACN+H
metab_3070	369.115	3.29465	(2R,3S,4S,5R,6S)-2-(hydroxymethyl)-6-(3,4,5-trimethoxyphenoxy)oxane-3,4,5-triol	-	-	-	-	C15H22O9	-	-	-	-	-	-	-	-		-	-	-	M+NH4, M+Na
metab_3088	213.087	2.79935	Gamma-Glutamylthreonine	HMDB0029159	gamma-Glutamylthreonine	248.101	5652-48-2	C9H16N2O6	-	-	-	-	-	-	-	-		Organic acids and derivatives	Carboxylic acids and derivatives	Amino acids, peptides, and analogues	M+H-2H2O, M+ACN+H
metab_3098	425.166	2.71978	Caryoptosidic acid	HMDB0034249	Caryoptosidic acid	392.132	220271-92-1	C16H24O11	-	-	-	-	-	-	-	-		Lipids and lipid-like molecules	Prenol lipids	Terpene glycosides	M+NH4, M+CH3OH+H
metab_3100	144.065	2.70775	O-Acetyl-L-homoserine	HMDB0029423	Acetylhomoserine	161.069	-	C6H11NO4	C01077	O-Acetyl-L-homoserine;O-Acetylhomoserine	-	-	map01100;map00270	Metabolic pathways; Cysteine and methionine metabolism	Metabolism;Metabolism	Global and overview maps;Amino acid metabolism		Organic acids and derivatives	Carboxylic acids and derivatives	Amino acids, peptides, and analogues	M+H-H2O, M+Na
metab_3121	172.06	1.1221	Patulin	HMDB0034299	Patulin	154.027	149-29-1	C7H6O4	C16748	Patulin	-	-	-	-	-	-		Organoheterocyclic compounds	Pyrans	Not Available	M+NH4, M+ACN+H
metab_3125	335.155	1.11508	3-bromohexadecanoic acid	LMFA01090160			-	C16H31BrO2	-	-	-	-	-	-	-	-		-	-	-	M+H, M+CH3OH+H
metab_3148	396.149	0.7899	13E-Tetranor-16-carboxy-LTE4	HMDB0012575;LMFA03020051	13E-Tetranor-16-carboxy-LTE4	413.151	-	C19H27NO7S	-	-	-	-	-	-	-	-		Organic acids and derivatives	Carboxylic acids and derivatives	Amino acids, peptides, and analogues	M+H-H2O, M+Na
metab_3150	414.16	0.7899	N-Acetyl-9-O-lactoylneuraminic acid	HMDB0000768	N-Acetyl-9-O-lactoylneuraminic acid	381.127	92935-30-3	C14H23NO11	-	-	-	-	-	-	-	-		Organic acids and derivatives	Carboxylic acids and derivatives	Amino acids, peptides, and analogues	M+H, M+CH3OH+H
metab_3167	353.155	0.755267	D-Fructosazine	HMDB0035284	D-Fructosazine	320.122	13185-73-4	C12H20N2O8	-	-	-	-	-	-	-	-		Organoheterocyclic compounds	Diazines	Pyrazines	M+H, M+CH3OH+H
metab_3178	471.181	0.748367	Threoninyl-Proline	HMDB0029069	Threonylproline	216.111	-	C9H16N2O4	-	-	-	-	-	-	-	-		Organic acids and derivatives	Carboxylic acids and derivatives	Amino acids, peptides, and analogues	M+Na, 2M+K
metab_3189	262.092	0.741383	2'-O-Methylguanosine	-	-	-	-	C11H15N5O5	-	-	-	-	-	-	-	-		-	-	-	M+H-2H2O, M+Na
metab_3190	236.112	0.741383	2',3'-Dideoxyadenosine	-	-	-	-	C10H13N5O2	-	-	-	-	-	-	-	-		-	-	-	M+H, M+ACN+Na
metab_3200	199.06	0.7137	3-hydroxy-4-methoxymandelate	HMDB0029170	3-Hydroxy-4-methoxymandelate	198.053	-	C9H10O5	-	-	-	-	-	-	-	-		Benzenoids	Phenols	Methoxyphenols	M+H-H2O, M+H
metab_3202	127.039	0.7137	3-hydroxy-4-methoxy-2,3-dihydropyran-6-one	-	-	-	-	C6H8O4	-	-	-	-	-	-	-	-		-	-	-	M+H-H2O, M+H-2H2O
metab_3206	118.086	0.706733	Betaine	HMDB0000043	Betaine	117.079	6915-17-9	C5H11NO2	C00719	Betaine;Trimethylaminoacetate;Glycine betaine;N,N,N-Trimethylglycine;Trimethylammonioacetate	-	-	map01100;map02010;map00260	Metabolic pathways; ABC transporters; Glycine, serine and threonine metabolism	Metabolism;Environmental Information Processing;Metabolism	Global and overview maps;Membrane transport;Amino acid metabolism		Organic acids and derivatives	Carboxylic acids and derivatives	Amino acids, peptides, and analogues	M+H, 2M+H
metab_3211	159.076	0.692883	Alanyl-Serine	HMDB0028696	Alanylserine	176.08	-	C6H12N2O4	-	-	-	-	-	-	-	-		Organic acids and derivatives	Carboxylic acids and derivatives	Amino acids, peptides, and analogues	M+H-H2O, M+ACN+H
metab_3213	104.071	0.692883	(R)-b-amino-isobutyric acid	LMFA01100049			-	C4H9NO2	C01205	(R)-3-Amino-2-methylpropanoate;(R)-3-Aminoisobutyrate;D-3-Aminoisobutanoate;(R)-beta-Aminoisobutyrate	-	-	map00240;map01100;map00280	Pyrimidine metabolism; Metabolic pathways; Valine, leucine and isoleucine degradation	Metabolism;Metabolism;Metabolism	Nucleotide metabolism;Global and overview maps;Amino acid metabolism		-	-	-	M+H-H2O, M+H
metab_3214	183.086	0.686083	D-Sorbitol	HMDB0000247	Sorbitol	182.079	50-70-4	C6H14O6	C00794	D-Sorbitol;D-Glucitol;L-Gulitol;Sorbitol	Carbohydrates	Monosaccharides	map01100;map02010;map00051;map00052	Metabolic pathways; ABC transporters; Fructose and mannose metabolism; Galactose metabolism	Metabolism;Environmental Information Processing;Metabolism;Metabolism	Global and overview maps;Membrane transport;Carbohydrate metabolism;Carbohydrate metabolism		Organic oxygen compounds	Organooxygen compounds	Carbohydrates and carbohydrate conjugates	M+H-H2O, M+H
metab_3217	84.0448	0.6793	2-Aminobut-2-enoate	-	-	-	-	C4H7NO2	C17234	2-Aminobut-2-enoate;(2Z)-2-Aminobut-2-enoic acid;2-Ammoniobut-2-enoate	-	-	-	-	-	-		-	-	-	M+H-H2O, M+H
metab_3230	156.077	0.631033	L-Histidine	HMDB0000177	L-Histidine	155.069	71-00-1	C6H9N3O2	C00135	L-Histidine;(S)-alpha-Amino-1H-imidazole-4-propionic acid	Peptides	Amino acids	map01100;map01110;map00340;map02010;map01230;map00970;map00410	Metabolic pathways; Biosynthesis of secondary metabolites; Histidine metabolism; ABC transporters; Biosynthesis of amino acids; Aminoacyl-tRNA biosynthesis; beta-Alanine metabolism	Metabolism;Metabolism;Metabolism;Environmental Information Processing;Metabolism;Genetic Information Processing;Metabolism	Global and overview maps;Global and overview maps;Amino acid metabolism;Membrane transport;Global and overview maps;Translation;Metabolism of other amino acids		Organic acids and derivatives	Carboxylic acids and derivatives	Amino acids, peptides, and analogues	M+H, M+Na
metab_3248	189.16	0.6102	N6,N6,N6-Trimethyl-L-lysine	HMDB0001325	N6,N6,N6-Trimethyl-L-lysine	188.152	19253-88-4	C9H20N2O2	C03793	N6,N6,N6-Trimethyl-L-lysine	-	-	map01100;map00310	Metabolic pathways; Lysine degradation	Metabolism;Metabolism	Global and overview maps;Amino acid metabolism		Organic acids and derivatives	Carboxylic acids and derivatives	Amino acids, peptides, and analogues	M+H, M+K
metab_3462	301.073	0.579717	1,4,5,8-TETRAHYDROXY-2,6-DIMETHYLANTHROQUINONE	-	-	-	-	C16H12O6	-	-	-	-	-	-	-	-		-	-	-	M+H
metab_3477	131.129	0.596233	Agmatine	HMDB0001432	Agmatine	130.122	306-60-5	C5H14N4	C00179	Agmatine;(4-Aminobutyl) guanidine	-	-	map01100;map00330	Metabolic pathways; Arginine and proline metabolism	Metabolism;Metabolism	Global and overview maps;Amino acid metabolism		Organic nitrogen compounds	Organonitrogen compounds	Guanidines	M+H
metab_3505	198.123	0.6172	Pilosinine	-	-	-	-	C9H12N2O2	-	-	-	-	-	-	-	-		-	-	-	M+NH4
metab_3528	76.0761	0.637733	Trimethylamine N-oxide	HMDB0000925	Trimethylamine N-oxide	75.0684	1184-78-7	C3H9NO	C01104	Trimethylamine N-oxide;(CH3)3NO	-	-	map01100	Metabolic pathways	Metabolism	Global and overview maps		Organic nitrogen compounds	Organonitrogen compounds	Aminoxides	M+H
metab_3542	333.069	0.651517	L-Glutamic acid	HMDB0003339;HMDB0060475;HMDB0000148	D-Glutamic acid;DL-Glutamate;L-Glutamic acid	147.053157781;147.053157781;147.053157781	56-86-0	C5H9NO4	C00025	L-Glutamate;L-Glutamic acid;L-Glutaminic acid;Glutamate	Peptides;Hormones and transmitters	Amino acids;Neurotransmitters	map01100;map00630;map00220;map01200;map00430;map01210;map00910;map02010;map00860;map00480;map00332;map00250;map01230;map00970;map00340;map01110;map00650;map00330;map00660	Metabolic pathways; Glyoxylate and dicarboxylate metabolism; Arginine biosynthesis; Carbon metabolism; Taurine and hypotaurine metabolism; 2-Oxocarboxylic acid metabolism; Nitrogen metabolism; ABC transporters; Porphyrin and chlorophyll metabolism; Glutathione metabolism; Carbapenem biosynthesis; Alanine, aspartate and glutamate metabolism; Biosynthesis of amino acids; Aminoacyl-tRNA biosynthesis…	Metabolism;Metabolism;Metabolism;Metabolism;Metabolism;Metabolism;Metabolism;Environmental Information Processing;Metabolism;Metabolism;Metabolism;Metabolism;Metabolism;Genetic Information Processing;Metabolism;Metabolism;Metabolism;Metabolism;Metabolism	Global and overview maps;Carbohydrate metabolism;Amino acid metabolism;Global and overview maps;Metabolism of other amino acids;Global and overview maps;Energy metabolism;Membrane transport;Metabolism of cofactors and vitamins;Metabolism of other amino acids;Biosynthesis of other secondary metabolites;Amino acid metabolism;Global and overview maps;Translation;Amino acid metabolism;Global and over…		Organic acids and derivatives	Carboxylic acids and derivatives	Amino acids, peptides, and analogues	2M+K
metab_3551	147.076	0.665467	L-Glutamine	HMDB0000641;HMDB0003423	L-Glutamine;D-Glutamine	146.069142196;146.069142196	56-85-9	C5H10N2O3	C00064	L-Glutamine;L-2-Aminoglutaramic acid	Peptides	Amino acids	map01100;map00630;map00220;map00230;map02010;map00910;map01230;map00240;map00250;map00970	Metabolic pathways; Glyoxylate and dicarboxylate metabolism; Arginine biosynthesis; Purine metabolism; ABC transporters; Nitrogen metabolism; Biosynthesis of amino acids; Pyrimidine metabolism; Alanine, aspartate and glutamate metabolism; Aminoacyl-tRNA biosynthesis	Metabolism;Metabolism;Metabolism;Metabolism;Environmental Information Processing;Metabolism;Metabolism;Metabolism;Metabolism;Genetic Information Processing	Global and overview maps;Carbohydrate metabolism;Amino acid metabolism;Nucleotide metabolism;Membrane transport;Energy metabolism;Global and overview maps;Nucleotide metabolism;Amino acid metabolism;Translation		Organic acids and derivatives	Carboxylic acids and derivatives	Amino acids, peptides, and analogues	M+H
metab_3554	74.0605	0.672333	Aminoacetone	HMDB0002134	Aminoacetone	73.0528	298-08-8	C3H7NO	C01888	Aminoacetone;1-Amino-2-propanone	-	-	map01100;map00260	Metabolic pathways; Glycine, serine and threonine metabolism	Metabolism;Metabolism	Global and overview maps;Amino acid metabolism		Organic oxygen compounds	Organooxygen compounds	Carbonyl compounds	M+H
metab_3556	326.144	0.672333	Glucopyranosylmoranoline	HMDB0059718	Glucopyranosylmoranoline	325.137	80312-32-9	C12H23NO9	-	-	-	-	-	-	-	-		Organic oxygen compounds	Organooxygen compounds	Carbohydrates and carbohydrate conjugates	M+H
metab_3564	111.044	0.699733	5-Methyl-2-furaldehyde	-	-	-	-	C6H6O2	C11115	5-Methyl-2-furaldehyde;5-Methyl-2-furfural	-	-	-	-	-	-		-	-	-	M+H
metab_3565	166.053	0.699733	L-Methionine S-oxide	HMDB0002005	Methionine sulfoxide	165.046	-	C5H11NO3S	C02989	L-Methionine S-oxide	-	-	map00270	Cysteine and methionine metabolism	Metabolism	Amino acid metabolism		Organic acids and derivatives	Carboxylic acids and derivatives	Amino acids, peptides, and analogues	M+H
metab_3571	134.06	0.7137	Oxindole	HMDB0061918	1,3-Dihydro-(2H)-indol-2-one	133.053	59-48-3	C8H7NO	C12312	Indolin-2-one	-	-	map00402;map01110	Benzoxazinoid biosynthesis; Biosynthesis of secondary metabolites	Metabolism;Metabolism	Biosynthesis of other secondary metabolites;Global and overview maps		Organoheterocyclic compounds	Indoles and derivatives	Indolines	M+H
metab_3572	162.112	0.7137	L-Carnitine	HMDB0000062	L-Carnitine	161.105	541-15-1	C7H15NO3	C00318	L-Carnitine;L-gamma-Trimethyl-beta-hydroxybutyrobetaine;Vitamin BT;3-Carboxy-2-hydroxy-N,N,N-trimethyl-1-propanaminium hydroxide, inner salt;Levocarnitine;(R)-Carnitine	-	-	-	-	-	-		Organic nitrogen compounds	Organonitrogen compounds	Quaternary ammonium salts	M+H
metab_3573	225.087	0.7137	3-Hydroxy-DL-kynurenine	HMDB0000732	Hydroxykynurenine	224.08	-	C10H12N2O4	C02794	3-Hydroxykynurenine;3-Hydroxy-DL-kynurenine	-	-	-	-	-	-		Organic oxygen compounds	Organooxygen compounds	Carbonyl compounds	M+H
metab_3581	282.118	0.720683	6-Methyladenosine	HMDB0004044	N6-Methyladenosine	281.112	-	C11H15N5O4	-	-	-	-	-	-	-	-		Nucleosides, nucleotides, and analogues	Purine nucleosides	Not Available	M+H
metab_3587	266.123	0.7274	N6-Methyl-2'-deoxyadenosine	-	-	-	-	C11H15N5O3	C03795	N6-Methyl-2'-deoxyadenosine	-	-	-	-	-	-		-	-	-	M+H
metab_3588	281.07	0.7274	Luteone 7-glucoside	HMDB0039316	Luteone 7-glucoside	516.163	137351-15-6	C26H28O11	-	-	-	-	-	-	-	-		Phenylpropanoids and polyketides	Isoflavonoids	Isoflavonoid O-glycosides	M+2Na
metab_3598	431.165	0.741383	GalNAcGlcNAcGA	-	-	-	-	C18H30N2O12	-	-	-	-	-	-	-	-		-	-	-	M+H-2H2O
metab_3607	458.186	0.76905	Propylene glycol alginate	HMDB0039860	Propylene glycol alginate	440.153	-	C17H28O13	-	-	-	-	-	-	-	-		Organic oxygen compounds	Organooxygen compounds	Carbohydrates and carbohydrate conjugates	M+NH4
metab_3626	84.0812	0.81085	5-Aminopentanal	HMDB0012815	5-Aminopentanal	101.084	-	C5H11NO	C12455	5-Aminopentanal	-	-	map01100;map00960;map00310;map01110	Metabolic pathways; Tropane, piperidine and pyridine alkaloid biosynthesis; Lysine degradation; Biosynthesis of secondary metabolites	Metabolism;Metabolism;Metabolism;Metabolism	Global and overview maps;Biosynthesis of other secondary metabolites;Amino acid metabolism;Global and overview maps		Organic oxygen compounds	Organooxygen compounds	Carbonyl compounds	M+H-H2O
metab_3633	125.023	0.817883	5-Hydroxymethyl-2-furancarboxylic acid	HMDB0002432;MJDBOTE0000585	Sumiki's acid	142.027	-	C6H6O4	C20448	5-Hydroxymethyl-2-furoate;5-Hydroxymethyl-2-furoic acid	-	-	-	-	-	-		Organoheterocyclic compounds	Furans	Furoic acid and derivatives	M+H-H2O
metab_3642	443.123	0.824883	3,4,5-trihydroxy-6-(3-{3,5,7-trihydroxy-4-[3,5,7-trihydroxy-2-(3-hydroxyphenyl)-3,4-dihydro-2H-1-benzopyran-8-yl]-6-[3,4,5-trihydroxy-6-(hydroxymethyl)oxan-2-yl]-3,4-dihydro-2H-1-benzopyran-2-yl}phenoxy)oxane-2-carboxylic acid	HMDB0126791	3,4,5-trihydroxy-6-(3-{3,5,7-trihydroxy-4-[3,5,7-trihydroxy-2-(3-hydroxyphenyl)-3,4-dihydro-2H-1-benzopyran-8-yl]-6-[3,4,5-trihydroxy-6-(hydroxymethyl)oxan-2-yl]-3,4-dihydro-2H-1-benzopyran-2-yl}phenoxy)oxane-2-carboxylic acid	884.238	-	C42H44O21	-	-	-	-	-	-	-	-		Phenylpropanoids and polyketides	Flavonoids	Biflavonoids and polyflavonoids	M+2H
metab_3693	365.105	0.908817	Sucrose	HMDB0000258	Sucrose	342.116	57-50-1	C12H22O11	C00089	Sucrose;Cane sugar;Saccharose;1-alpha-D-Glucopyranosyl-2-beta-D-fructofuranoside	Carbohydrates	Oligosaccharides	map01100;map00500;map01110;map02010;map00052	Metabolic pathways; Starch and sucrose metabolism; Biosynthesis of secondary metabolites; ABC transporters; Galactose metabolism	Metabolism;Metabolism;Metabolism;Environmental Information Processing;Metabolism	Global and overview maps;Carbohydrate metabolism;Global and overview maps;Membrane transport;Carbohydrate metabolism		Organic oxygen compounds	Organooxygen compounds	Carbohydrates and carbohydrate conjugates	M+Na
metab_3697	343.123	0.91185	Trehalose	HMDB0000975	Trehalose	342.116	99-20-7	C12H22O11	C01083	alpha,alpha-Trehalose;alpha,alpha'-Trehalose;Trehalose	Carbohydrates	Oligosaccharides	map01100;map00500;map01110;map02010	Metabolic pathways; Starch and sucrose metabolism; Biosynthesis of secondary metabolites; ABC transporters	Metabolism;Metabolism;Metabolism;Environmental Information Processing	Global and overview maps;Carbohydrate metabolism;Global and overview maps;Membrane transport		Organic oxygen compounds	Organooxygen compounds	Carbohydrates and carbohydrate conjugates	M+H
metab_3703	427.075	0.924933	Guanosine 5'-Monophosphate	HMDB0001397	Guanosine monophosphate	363.058	-	C10H14N5O8P	C00144	GMP;Guanosine 5'-phosphate;Guanosine monophosphate;Guanosine 5'-monophosphate;Guanylic acid	Nucleic acids	Nucleotides	map01100;map00230	Metabolic pathways; Purine metabolism	Metabolism;Metabolism	Global and overview maps;Nucleotide metabolism		Nucleosides, nucleotides, and analogues	Purine nucleotides	Purine ribonucleotides	M+ACN+Na
metab_3773	176.103	1.07298	L-Citrulline	HMDB0000904	Citrulline	175.096	372-75-8	C6H13N3O3	C00327	L-Citrulline;2-Amino-5-ureidovaleric acid;Citrulline	Peptides	Amino acids	map01100;map00220;map01110;map01230	Metabolic pathways; Arginine biosynthesis; Biosynthesis of secondary metabolites; Biosynthesis of amino acids	Metabolism;Metabolism;Metabolism;Metabolism	Global and overview maps;Amino acid metabolism;Global and overview maps;Global and overview maps		Organic acids and derivatives	Carboxylic acids and derivatives	Amino acids, peptides, and analogues	M+H
metab_3814	125.071	1.1221	Piracetam	-	-	-	-	C6H10N2O2	-	-	-	-	-	-	-	-		-	-	-	M+H-H2O
metab_3821	181.049	1.12908	3-(3,5-Dihydroxyphenyl)-2-propenoic acid	HMDB0032131	3,5-Dihydroxycinnamic acid	180.042	-	C9H8O4	-	-	-	-	-	-	-	-		Phenylpropanoids and polyketides	Cinnamic acids and derivatives	Hydroxycinnamic acids and derivatives	M+H
metab_3831	305.134	1.13962	Deoxyfructosazine	HMDB0038696	Deoxyfructosazine	304.127	-	C12H20N2O7	-	-	-	-	-	-	-	-		Organoheterocyclic compounds	Diazines	Pyrazines	M+H
metab_3850	255.56	1.17088	Pyranocyanin B	HMDB0035370	Pyranocyanin B	487.124	-	C24H23O11+	-	-	-	-	-	-	-	-		Phenylpropanoids and polyketides	Flavonoids	Flavonoid glycosides	M+H+Na
metab_3853	102.055	1.17847	Homoserine lactone	HMDB0029387	L-3-Aminodihydro-2(3H)-furanone	101.048	-	C4H7NO2	C02926	Homoserine lactone;2-Aminobutan-4-olide	-	-	-	-	-	-		Organic acids and derivatives	Carboxylic acids and derivatives	Amino acids, peptides, and analogues	M+H
metab_3854	291.129	1.17847	5-Hydroxymethylcytidine	-	-	-	-	C10H15N3O6	-	-	-	-	-	-	-	-		-	-	-	M+NH4
metab_3868	431.165	1.199	Roseoside	-	-	-	-	C19H30O8	-	-	-	-	-	-	-	-		-	-	-	M+2Na-H
metab_3879	139.05	1.21643	Urocanic acid	HMDB0062562;HMDB0000301	Trans-urocanate;Urocanic acid	138.042927441;138.042927446	3465-72-3	C6H6N2O2	C00785	Urocanate;Urocanic acid	-	-	map01100;map00340	Metabolic pathways; Histidine metabolism	Metabolism;Metabolism	Global and overview maps;Amino acid metabolism		Organoheterocyclic compounds	Azoles	Imidazoles	M+H
metab_3883	227.102	1.22147	Porphobilinogen	HMDB0000245	Porphobilinogen	226.095	487-90-1	C10H14N2O4	C00931	Porphobilinogen	-	-	map01100;map01110;map00860	Metabolic pathways; Biosynthesis of secondary metabolites; Porphyrin and chlorophyll metabolism	Metabolism;Metabolism;Metabolism	Global and overview maps;Global and overview maps;Metabolism of cofactors and vitamins		Organic nitrogen compounds	Organonitrogen compounds	Amines	M+H
metab_3890	290.134	1.22448	2'-O-Methylcytidine	-	-	-	-	C10H15N3O5	-	-	-	-	-	-	-	-		-	-	-	M+CH3OH+H
metab_3899	354.029	1.23145	(2R)-2-Hydroxybut-3-enylglucosinolate	-	-	-	-	C11H19NO10S2	-	-	-	-	-	-	-	-		-	-	-	M+H-2H2O
metab_3918	405.197	1.25795	Blasticidin	-	-	-	-	C17H26N8O5	-	-	-	-	-	-	-	-		-	-	-	M+H-H2O
metab_3921	481.214	1.26297	Dihydroisomorphine-6-glucuronide	HMDB0061137	Dihydroisomorphine-6-glucuronide	463.184	-	C23H29NO9	-	-	-	-	-	-	-	-		Alkaloids and derivatives	Morphinans	Not Available	M+NH4
metab_3926	232.081	1.2715	N-Acetyl-L-2-amino-6-oxopimelate	-	-	-	-	C9H13NO6	C05539	N-Acetyl-L-2-amino-6-oxopimelate;L-2-Acetamido-6-oxoheptanedioate;L-2-Acetamido-6-oxopimelate	-	-	map01100;map01110;map00300;map01230;map00261	Metabolic pathways; Biosynthesis of secondary metabolites; Lysine biosynthesis; Biosynthesis of amino acids; Monobactam biosynthesis	Metabolism;Metabolism;Metabolism;Metabolism;Metabolism	Global and overview maps;Global and overview maps;Amino acid metabolism;Global and overview maps;Biosynthesis of other secondary metabolites		-	-	-	M+H
metab_3932	289.15	1.28398	2'-O-Methyl-5-methylcytidine	-	-	-	-	C11H17N3O5	-	-	-	-	-	-	-	-		-	-	-	M+NH4
metab_3967	489.066	1.34223	{5-hydroxy-6-[3-(4-hydroxyphenyl)prop-2-enoyl]-7-methoxy-2,2-dimethyl-3,4-dihydro-2H-1-benzopyran-4-yl}oxidanesulfonic acid	HMDB0125811	{5-hydroxy-6-[3-(4-hydroxyphenyl)prop-2-enoyl]-7-methoxy-2,2-dimethyl-3,4-dihydro-2H-1-benzopyran-4-yl}oxidanesulfonic acid	450.098	-	C21H22O9S	-	-	-	-	-	-	-	-		Phenylpropanoids and polyketides	Linear 1,3-diarylpropanoids	Chalcones and dihydrochalcones	M+K
metab_3972	343.044	1.35517	6H-Purin-6-one, 1,9-dihydro-9-(5-S-methyl-5-thiopentofuranosyl)-	-	-	-	-	C11H14N4O4S	-	-	-	-	-	-	-	-		-	-	-	M+2Na-H
metab_3978	130.05	1.36402	(R)-(+)-2-Pyrrolidone-5-carboxylic acid	-	-	-	-	C5H7NO3	-	-	-	-	-	-	-	-		-	-	-	M+H
metab_3999	141.029	1.39288	Uracil 5-carbaldehyde	-	-	-	-	C5H4N2O3	C17206	Uracil 5-carbaldehyde;5-Formyluracil	-	-	-	-	-	-		-	-	-	M+H
metab_4067	329.029	1.58185	Xanthosine 5'-Monophosphate	HMDB0001554	Xanthylic acid	364.042	-	C10H13N4O9P	C00655	Xanthosine 5'-phosphate;Xanthylic acid;XMP;(9-D-Ribosylxanthine)-5'-phosphate	-	-	map01100;map01110;map00230	Metabolic pathways; Biosynthesis of secondary metabolites; Purine metabolism	Metabolism;Metabolism;Metabolism	Global and overview maps;Global and overview maps;Nucleotide metabolism		Nucleosides, nucleotides, and analogues	Purine nucleotides	Purine ribonucleotides	M+H-2H2O
metab_4069	190.071	1.58975	N-Acetyl-L-glutamic acid	HMDB0001138	N-Acetyl-L-glutamic acid	189.064	1188-37-0	C7H11NO5	C00624	N-Acetyl-L-glutamate;N-Acetyl-L-glutamic acid	-	-	map01100;map01210;map00220;map01110;map01230	Metabolic pathways; 2-Oxocarboxylic acid metabolism; Arginine biosynthesis; Biosynthesis of secondary metabolites; Biosynthesis of amino acids	Metabolism;Metabolism;Metabolism;Metabolism;Metabolism	Global and overview maps;Global and overview maps;Amino acid metabolism;Global and overview maps;Global and overview maps		Organic acids and derivatives	Carboxylic acids and derivatives	Amino acids, peptides, and analogues	M+H
metab_4086	256.117	1.64922	Ethyl 2-(2-acetyl-3,5-dihydroxyphenyl)acetate	-	-	-	-	C12H14O5	-	-	-	-	-	-	-	-		-	-	-	M+NH4
metab_4111	276.101	1.71965	Cysteinyl-Hydroxyproline	HMDB0028776	Cysteinylhydroxyproline	234.067	-	C8H14N2O4S	-	-	-	-	-	-	-	-		Organic acids and derivatives	Carboxylic acids and derivatives	Amino acids, peptides, and analogues	M+ACN+H
metab_4151	123.044	1.8619	4-Hydroxybenzaldehyde	HMDB0011718	4-Hydroxybenzaldehyde	122.037	123-08-0	C7H6O2	C00633	4-Hydroxybenzaldehyde;p-Hydroxybenzaldehyde	-	-	map01100	Metabolic pathways	Metabolism	Global and overview maps		Organic oxygen compounds	Organooxygen compounds	Carbonyl compounds	M+H
metab_4154	432.149	1.8619	FucGlcNAcGA	-	-	-	-	C16H27NO11	-	-	-	-	-	-	-	-		-	-	-	M+Na
metab_4201	194.081	2.0825	4-Methylumbelliferone	HMDB0059622	4-Methylumbelliferone	176.047	-	C10H8O3	C03081	4-Methylumbelliferone;Hymecromone	-	-	-	-	-	-		Phenylpropanoids and polyketides	Coumarins and derivatives	Hydroxycoumarins	M+NH4
metab_4268	346.054	2.38793	CGMP	HMDB0001314	Cyclic GMP	345.047	-	C10H12N5O7P	C00942	3',5'-Cyclic GMP;Guanosine 3',5'-cyclic monophosphate;Guanosine 3',5'-cyclic phosphate;Cyclic GMP;cGMP	Nucleic acids	Cyclic nucleotides	map01100;map00230	Metabolic pathways; Purine metabolism	Metabolism;Metabolism	Global and overview maps;Nucleotide metabolism		Nucleosides, nucleotides, and analogues	Purine nucleotides	Cyclic purine nucleotides	M+H
metab_4282	240.123	2.41412	(7R,8R)-7,8-Dihydroxy-3,5,7-trimethyl-7,8-dihydro-6H-isochromen-6-one	-	-	-	-	C12H14O4	-	-	-	-	-	-	-	-		-	-	-	M+NH4
metab_4311	112.051	2.48175	Cytosine	HMDB0000630	Cytosine	111.043	71-30-7	C4H5N3O	C00380	Cytosine	Nucleic acids	Bases	map00240;map01100	Pyrimidine metabolism; Metabolic pathways	Metabolism;Metabolism	Nucleotide metabolism;Global and overview maps		Organoheterocyclic compounds	Diazines	Pyrimidines and pyrimidine derivatives	M+H
metab_4317	339.155	2.49697	Dehydrohistidyl-tryptophanyl-diketopiperazine	-	-	-	-	C17H15N5O2	-	-	-	-	-	-	-	-		-	-	-	M+NH4
metab_4353	342.154	2.54425	MJPW00144	;MJPW00144			-	C14H20O7	-	-	-	-	-	-	-	-		-	-	-	M+ACN+H
metab_4365	376.123	2.57165	6-[4-(2-carboxyethyl)-2-hydroxyphenoxy]-3,4,5-trihydroxyoxane-2-carboxylic acid	HMDB0124979	6-[4-(2-carboxyethyl)-2-hydroxyphenoxy]-3,4,5-trihydroxyoxane-2-carboxylic acid	358.09	-	C15H18O10	-	-	-	-	-	-	-	-		Organic oxygen compounds	Organooxygen compounds	Carbohydrates and carbohydrate conjugates	M+NH4
metab_4382	348.07	2.58897	Adenosine 3'-monophosphate	HMDB0003540	3'-AMP	347.063	-	C10H14N5O7P	C01367	3'-AMP;3'-Adenylic acid;3'-Adenosine monophosphate;Adenosine-3'-monophosphate;Adenosine 3'-phosphate;AMP 3'-phosphate	-	-	map01100;map00230	Metabolic pathways; Purine metabolism	Metabolism;Metabolism	Global and overview maps;Nucleotide metabolism		Nucleosides, nucleotides, and analogues	Ribonucleoside 3'-phosphates	Not Available	M+H
metab_4387	481.213	2.59497	Perindoprilat glucuronide	HMDB0060863	Perindoprilat glucuronide	516.232	-	C23H36N2O11	-	-	-	-	-	-	-	-		Organic acids and derivatives	Peptidomimetics	Depsipeptides	M+H-2H2O
metab_4391	304.165	2.59842	Phenylalanine, prolyl-	-	-	-	-	C14H18N2O3	-	-	-	-	-	-	-	-		-	-	-	M+ACN+H
metab_4403	265.089	2.60543	Diosbulbinoside D	HMDB0030084	Diosbulbinoside D	506.179	66756-59-0	C25H30O11	-	-	-	-	-	-	-	-		Organoheterocyclic compounds	Naphthopyrans	Not Available	M+H+Na
metab_4405	451.125	2.60543	6-(3-{8-[2-(3,4-dihydroxyphenyl)-3,5,7-trihydroxy-6-[3,4,5-trihydroxy-6-(hydroxymethyl)oxan-2-yl]-3,4-dihydro-2H-1-benzopyran-4-yl]-3,5,7-trihydroxy-3,4-dihydro-2H-1-benzopyran-2-yl}phenoxy)-3,4,5-trihydroxyoxane-2-carboxylic acid	HMDB0126779	6-(3-{8-[2-(3,4-dihydroxyphenyl)-3,5,7-trihydroxy-6-[3,4,5-trihydroxy-6-(hydroxymethyl)oxan-2-yl]-3,4-dihydro-2H-1-benzopyran-4-yl]-3,5,7-trihydroxy-3,4-dihydro-2H-1-benzopyran-2-yl}phenoxy)-3,4,5-trihydroxyoxane-2-carboxylic acid	900.232	-	C42H44O22	-	-	-	-	-	-	-	-		Phenylpropanoids and polyketides	Flavonoids	Biflavonoids and polyflavonoids	M+2H
metab_4429	396.15	2.64517	Mmv000016	-	-	-	-	C17H16F6N2O	-	-	-	-	-	-	-	-		-	-	-	M+NH4
metab_4439	378.08	2.66125	Nicotinic acid mono nucleotide	-	-	-	-	C11H15NO9P+	-	-	-	-	-	-	-	-		-	-	-	M+ACN+H
metab_4472	450.117	2.69163	Pyrogallin	-	-	-	-	C11H8O4	-	-	-	-	-	-	-	-		-	-	-	2M+ACN+H
metab_4477	194.081	2.6984	Methyl 2-benzamidoacetate	-	-	-	-	C10H11NO3	-	-	-	-	-	-	-	-		-	-	-	M+H
metab_4479	377.191	2.6984	Isopentenyl-Adenosine-[d6]	-	-	-	-	C15H21N5O4	-	-	-	-	-	-	-	-		-	-	-	M+ACN+H
metab_4484	416.238	2.70393	(5S,6E,8Z,10E,12E,14R,15S)-5,14,15-trihydroxyicosa-6,8,10,12-tetraenoic acid	HMDB0005082	Lipoxin B4	352.225	98049-69-5	C20H32O5	C06315	Lipoxin B4;LXB4;5S,14R,15S-Trihydroxy-6E,8Z,10E,12E-eicosatetraenoic acid;(6E,8Z,10E,12E)-(5S,14R,15S)-Trihydroxyicosa-6,8,10,12-tetraenoic acid	-	-	map00590	Arachidonic acid metabolism	Metabolism	Lipid metabolism		Lipids and lipid-like molecules	Fatty Acyls	Eicosanoids	M+ACN+Na
metab_4545	282.133	2.78917	3-(3,4,5-trimethoxyphenyl)propanoic acid	HMDB0030254	3-(3,4,5-Trimethoxyphenyl)propanoic acid	240.1	25173-72-2	C12H16O5	-	-	-	-	-	-	-	-		Phenylpropanoids and polyketides	Phenylpropanoic acids	Not Available	M+ACN+H
metab_4556	132.081	2.80757	3-Methoxytyramine	HMDB0000022	3-Methoxytyramine	167.095	554-52-9	C9H13NO2	C05587	3-Methoxytyramine	-	-	map01100;map00965;map00350	Metabolic pathways; Betalain biosynthesis; Tyrosine metabolism	Metabolism;Metabolism;Metabolism	Global and overview maps;Biosynthesis of other secondary metabolites;Amino acid metabolism		Benzenoids	Phenols	Methoxyphenols	M+H-2H2O
metab_4566	402.175	2.82303	Beta-D-Glucopyranoside, 3-hydroxy-2-(4-hydroxy-3-methoxyphenyl)propyl	-	-	-	-	C16H24O9	-	-	-	-	-	-	-	-		-	-	-	M+ACN+H
metab_4574	286.092	2.83433	Buchananine	-	-	-	-	C12H15NO7	C10134	Buchananine	-	-	-	-	-	-		-	-	-	M+H
metab_4630	192.065	2.91137	MJAW00190	;MJAW00190			-	C10H9NO3	-	-	-	-	-	-	-	-		-	-	-	M+H
metab_4639	232.557	2.9254	Pinotin A aglycone	HMDB0029251	Pinotin A aglycone	463.103	-	C25H19O9+	-	-	-	-	-	-	-	-		Phenylpropanoids and polyketides	Flavonoids	O-methylated flavonoids	M+2H
metab_4641	305.085	2.9254	2'-O-Methylinosine	-	-	-	-	C11H14N4O5	-	-	-	-	-	-	-	-		-	-	-	M+Na
metab_4643	374.108	2.9254	3,4,5-trihydroxy-6-{[3-hydroxy-2-(hydroxymethyl)-2-methylpropanoyl]oxy}oxane-2-carboxylic acid	HMDB0127650	3,4,5-trihydroxy-6-{[3-hydroxy-2-(hydroxymethyl)-2-methylpropanoyl]oxy}oxane-2-carboxylic acid	310.09	-	C11H18O10	-	-	-	-	-	-	-	-		Organic oxygen compounds	Organooxygen compounds	Carbohydrates and carbohydrate conjugates	M+ACN+Na
metab_4651	269.113	2.93827	Serinyl-Tyrosine	HMDB0029051	Seryltyrosine	268.106	-	C12H16N2O5	-	-	-	-	-	-	-	-		Organic acids and derivatives	Carboxylic acids and derivatives	Amino acids, peptides, and analogues	M+H
metab_4672	386.18	2.96618	Beta-D-Glucopyranoside, 4-(3-hydroxypropyl)-2-methoxyphenyl	-	-	-	-	C16H24O8	-	-	-	-	-	-	-	-		-	-	-	M+ACN+H
metab_4688	400.16	3.00727	Beta-D-Glucopyranoside, 2-(1,3-benzodioxol-5-yl)-3-hydroxypropyl	-	-	-	-	C16H22O9	-	-	-	-	-	-	-	-		-	-	-	M+ACN+H
metab_4694	305.113	3.02143	Indole-3-acetyl-L-glutamic acid	-	-	-	-	C15H16N2O5	-	-	-	-	-	-	-	-		-	-	-	M+H
metab_4702	178.086	3.0362	Kainic acid	-	-	-	-	C10H15NO4	C12819	Kainic acid;alpha- Kainic acid;Kainate	-	-	-	-	-	-		-	-	-	M+H-2H2O
metab_4706	284.149	3.0396	(E)-5-(4-methoxy-5-methyl-6-oxopyran-2-yl)-3-methylhex-4-enoic acid	-	-	-	-	C14H18O5	-	-	-	-	-	-	-	-		-	-	-	M+NH4
metab_4724	278.102	3.07062	(beta-D-Glucopyranosyloxy)(phenyl)acetonitrile	HMDB0035022	Prulaurasin	295.106	-	C14H17NO6	-	-	-	-	-	-	-	-		Organic oxygen compounds	Organooxygen compounds	Carbohydrates and carbohydrate conjugates	M+H-H2O
metab_4732	197.044	3.083	3-Methoxy-4,5-methylenedioxybenzoic acid	HMDB0030800	3-Methoxy-4,5-methylenedioxybenzoic acid	196.037	526-34-1	C9H8O5	-	-	-	-	-	-	-	-		Benzenoids	Benzene and substituted derivatives	Benzoic acids and derivatives	M+H
metab_4764	243.134	3.1454	MJAW00014	;MJAW00014			-	C11H20N2O5	-	-	-	-	-	-	-	-		-	-	-	M+H-H2O
metab_4778	177.102	3.17025	Serotonin	HMDB0000259	Serotonin	176.095	50-67-9	C10H12N2O	C00780	Serotonin;3-(2-Aminoethyl)-1H-indol-5-ol;5-Hydroxytryptamine;Enteramine	Peptides;Hormones and transmitters	Amines;Neurotransmitters	map01100;map00380	Metabolic pathways; Tryptophan metabolism	Metabolism;Metabolism	Global and overview maps;Amino acid metabolism		Organoheterocyclic compounds	Indoles and derivatives	Tryptamines and derivatives	M+H
metab_4787	414.175	3.18483	Methyl (3x,4E,10R)-3,10-dihydroxy-4,11-dodecadiene-6,8-diynoate 10-glucoside	HMDB0040897	Methyl (3x,4E,10R)-3,10-dihydroxy-4,11-dodecadiene-6,8-diynoate 10-glucoside	396.142	142449-85-2	C19H24O9	-	-	-	-	-	-	-	-		Lipids and lipid-like molecules	Fatty Acyls	Fatty acyl glycosides	M+NH4
metab_4796	171.065	3.20802	Methyl 3,4,5-trihydroxycyclohexene-1-carboxylate	-	-	-	-	C8H12O5	-	-	-	-	-	-	-	-		-	-	-	M+H-H2O
metab_4836	178.086	3.28708	L-beta-Homotyrosine	-	-	-	-	C10H13NO3	-	-	-	-	-	-	-	-		-	-	-	M+H-H2O
metab_4842	263.139	3.29465	Phenylalanylproline	HMDB0011177	Phenylalanylproline	262.132	7669-65-0	C14H18N2O3	-	-	-	-	-	-	-	-		Organic acids and derivatives	Carboxylic acids and derivatives	Amino acids, peptides, and analogues	M+H
metab_4843	298.128	3.29465	Phenethylamine glucuronide	HMDB0010323	Phenethylamine glucuronide	297.121	-	C14H19NO6	C03033	beta-D-Glucuronoside;O-beta-D-Glucuronoside;Glucuronide;beta-D-Glucuronide	-	-	map01100;map00040	Metabolic pathways; Pentose and glucuronate interconversions	Metabolism;Metabolism	Global and overview maps;Carbohydrate metabolism		Organic oxygen compounds	Organooxygen compounds	Carbohydrates and carbohydrate conjugates	M+H
metab_4891	258.145	3.39675	4-Hexylresorcinol	HMDB0032567	Hexylresorcinol	194.131	-	C12H18O2	-	-	-	-	-	-	-	-		Benzenoids	Phenols	Benzenediols	M+ACN+Na
metab_4895	198.076	3.40155	3-hydroxy-7-methoxy-3H-2-benzofuran-1-one	-	-	-	-	C9H8O4	-	-	-	-	-	-	-	-		-	-	-	M+NH4
metab_4916	196.034	3.44377	Methyl 6-O-galloyl-beta-D-glucopyranoside	HMDB0039354	Methyl 6-O-galloyl-beta-D-glucopyranoside	346.09	88647-06-7	C14H18O10	-	-	-	-	-	-	-	-		Benzenoids	Benzene and substituted derivatives	Benzoic acids and derivatives	M+2Na
metab_4917	455.188	3.44377	Deoxycytidine	HMDB0000014	Deoxycytidine	227.091	951-77-9	C9H13N3O4	C00881	Deoxycytidine;2'-Deoxycytidine	Nucleic acids	Nucleosides	map00240;map01100;map02010	Pyrimidine metabolism; Metabolic pathways; ABC transporters	Metabolism;Metabolism;Environmental Information Processing	Nucleotide metabolism;Global and overview maps;Membrane transport		Nucleosides, nucleotides, and analogues	Pyrimidine nucleosides	Pyrimidine 2'-deoxyribonucleosides	2M+H
metab_4958	298.097	3.52012	5'-Deoxy-5'-(methylthio)adenosine	HMDB0001173	5'-Methylthioadenosine	297.09	-	C11H15N5O3S	C00170	5'-Methylthioadenosine;Methylthioadenosine;S-Methyl-5'-thioadenosine;5-Methylthioadenosine;5'-Deoxy-5'-(methylthio)adenosine;Thiomethyladenosine;MTA	-	-	map01100;map00270;map00908	Metabolic pathways; Cysteine and methionine metabolism; Zeatin biosynthesis	Metabolism;Metabolism;Metabolism	Global and overview maps;Amino acid metabolism;Metabolism of terpenoids and polyketides		Nucleosides, nucleotides, and analogues	5'-deoxyribonucleosides	5'-deoxy-5'-thionucleosides	M+H
metab_4969	345.13	3.53637	3,15-Diacetyldeoxynivalenol	-	-	-	-	C19H24O8	-	-	-	-	-	-	-	-		-	-	-	M+H-2H2O
metab_4994	282.133	3.56873	3-(2-hydroxypropyl)-6,8-dimethoxyisochromen-1-one	-	-	-	-	C14H16O5	-	-	-	-	-	-	-	-		-	-	-	M+NH4
metab_5019	414.15	3.61403	7-(5,7-dimethoxy-4-oxochromen-2-yl)-6-hydroxyheptanoic acid	-	-	-	-	C18H22O7	-	-	-	-	-	-	-	-		-	-	-	M+ACN+Na
metab_5037	418.167	3.6422	MJPW00180	;MJPW00180			-	C16H24O10	-	-	-	-	-	-	-	-		-	-	-	M+ACN+H
metab_5126	354.19	3.8136	Beta-D-Glucopyranoside, 5-methyl-2-(1-methylethyl)phenyl	-	-	-	-	C16H24O6	-	-	-	-	-	-	-	-		-	-	-	M+ACN+H
metab_5128	280.227	3.81697	Lauric isopropanolamide	-	-	-	-	C15H31NO2	-	-	-	-	-	-	-	-		-	-	-	M+Na
metab_5129	276.144	3.82032	Xanthinol	-	-	-	-	C13H21N5O4	-	-	-	-	-	-	-	-		-	-	-	M+H-2H2O
metab_5160	382.149	3.88828	Gly-Trp-Gly	-	-	-	-	C15H18N4O4	-	-	-	-	-	-	-	-		-	-	-	M+ACN+Na
metab_5183	314.159	3.93853	Trichothec-9-en-8-one, 12,13-epoxy-3,7,15-trihydroxy-, (2xi,3alpha,7alpha,11xi)-	-	-	-	-	C15H20O6	-	-	-	-	-	-	-	-		-	-	-	M+NH4
metab_5186	342.154	3.94275	4-(2-Hydroxyethyl)phenyl beta-D-glucopyranoside	-	-	-	-	C14H20O7	-	-	-	-	-	-	-	-		-	-	-	M+ACN+H
metab_5199	153.127	3.96243	Limonene-1,2-epoxide	HMDB0035158;LMPR0102090015	1,2-Epoxy-p-menth-8-ene	152.12	-	C10H16O	C07271	Limonene-1,2-epoxide;Limonene oxide;(4R)-Limonene-1,2-epoxide	-	-	map00903	Limonene and pinene degradation	Metabolism	Metabolism of terpenoids and polyketides		Organoheterocyclic compounds	Oxepanes	Not Available	M+H
metab_5220	152.07	4.01257	N-METHYLANTHRANILIC ACID	HMDB0032609	2-(Methylamino)benzoic acid	151.063	119-68-6	C8H9NO2	C03005	N-Methylanthranilate;N-Methylanthranilic acid;2-(Methylamino)benzoic acid	-	-	map01058;map01110	Acridone alkaloid biosynthesis; Biosynthesis of secondary metabolites	Metabolism;Metabolism	Biosynthesis of other secondary metabolites;Global and overview maps		Benzenoids	Benzene and substituted derivatives	Benzoic acids and derivatives	M+H
metab_5263	183.065	4.0862	3-(2,3-Dihydroxyphenyl)propanoate	HMDB0134042	3-(2,3-dihydroxyphenyl)propanoic acid	182.058	-	C9H10O4	C04044	3-(2,3-Dihydroxyphenyl)propanoate;2,3-Dihydroxyphenylpropanoate	-	-	map01100;map00360	Metabolic pathways; Phenylalanine metabolism	Metabolism;Metabolism	Global and overview maps;Amino acid metabolism		Phenylpropanoids and polyketides	Phenylpropanoic acids	Not Available	M+H
metab_5264	262.118	4.0862	Gly-Trp	HMDB0028852	Glycyl-Tryptophan	261.111	-	C13H15N3O3	-	-	-	-	-	-	-	-		Organic acids and derivatives	Carboxylic acids and derivatives	Amino acids, peptides, and analogues	M+H
metab_5265	326.123	4.0862	1-O-Benzoyl-beta-D-glucopyranose	-	-	-	-	C13H16O7	-	-	-	-	-	-	-	-		-	-	-	M+ACN+H
metab_5295	112.039	4.15182	Pyrrole-2-carboxylic acid	HMDB0004230	Pyrrole-2-carboxylic acid	111.032	634-97-9	C5H5NO2	C05942	Pyrrole-2-carboxylate	-	-	map00330	Arginine and proline metabolism	Metabolism	Amino acid metabolism		Organoheterocyclic compounds	Pyrroles	Pyrrole carboxylic acids and derivatives	M+H
metab_5299	212.164	4.15608	N-Butylscopolamine metabolite	-	-	-	-	C12H21NO2	-	-	-	-	-	-	-	-		-	-	-	M+H
metab_5320	192.138	4.18797	N-Ethyl-N-Methylcathinone	-	-	-	-	C12H17NO	-	-	-	-	-	-	-	-		-	-	-	M+H
metab_5361	303.122	4.26318	3-Acetyldeoxynivalenol	HMDB0036137	Acetyldeoxynivalenol	338.137	-	C17H22O7	-	-	-	-	-	-	-	-		Lipids and lipid-like molecules	Prenol lipids	Sesquiterpenoids	M+H-2H2O
metab_5390	427.091	4.32633	3,4,5-trihydroxy-6-({8-hydroxy-2-oxo-2H-furo[2,3-h]chromen-4-yl}oxy)oxane-2-carboxylic acid	HMDB0135850	3,4,5-trihydroxy-6-({8-hydroxy-2-oxo-2H-furo[2,3-h]chromen-4-yl}oxy)oxane-2-carboxylic acid	394.054	-	C17H14O11	-	-	-	-	-	-	-	-		Phenylpropanoids and polyketides	Coumarins and derivatives	Coumarin glycosides	M+CH3OH+H
metab_5397	222.149	4.3362	7-(2-aminophenyl)heptanoic acid	-	-	-	-	C13H19NO2	-	-	-	-	-	-	-	-		-	-	-	M+H
metab_5414	272.068	4.3746	Reduced glutathione	HMDB0000125	Glutathione	307.084	-	C10H17N3O6S	C00051	Glutathione;5-L-Glutamyl-L-cysteinylglycine;N-(N-gamma-L-Glutamyl-L-cysteinyl)glycine;gamma-L-Glutamyl-L-cysteinyl-glycine;GSH;Reduced glutathione	Vitamins and Cofactors	Cofactors	map01100;map00270;map00480;map02010	Metabolic pathways; Cysteine and methionine metabolism; Glutathione metabolism; ABC transporters	Metabolism;Metabolism;Metabolism;Environmental Information Processing	Global and overview maps;Amino acid metabolism;Metabolism of other amino acids;Membrane transport		Organic acids and derivatives	Carboxylic acids and derivatives	Amino acids, peptides, and analogues	M+H-2H2O
metab_5418	287.138	4.37863	Pilosine	-	-	-	-	C16H18N2O3	C10610	Pilosine	-	-	-	-	-	-		-	-	-	M+H
metab_5422	197.081	4.38735	ORSELLINIC ACID, ETHYL ESTER	-	-	-	-	C10H12O4	-	-	-	-	-	-	-	-		-	-	-	M+H
metab_5428	175.075	4.39823	4,7,7-Trimethyl-2,3-dioxo-bicyclo[2.2.1]heptane-1-carboxylic acid	-	-	-	-	C11H14O4	-	-	-	-	-	-	-	-		-	-	-	M+H-2H2O
metab_5435	263.139	4.40515	L-phenylalanyl-L-proline	HMDB0011177	Phenylalanylproline	262.132	-	C14H18N2O3	-	-	-	-	-	-	-	-		Organic acids and derivatives	Carboxylic acids and derivatives	Amino acids, peptides, and analogues	M+H
metab_5466	207.138	4.45465	(E)-6-Methyl-6-(5-methyl-2-furanyl)-3-hepten-2-one	HMDB0033196	(E)-6-Methyl-6-(5-methyl-2-furanyl)-3-hepten-2-one	206.131	77822-41-4	C13H18O2	-	-	-	-	-	-	-	-		Organoheterocyclic compounds	Heteroaromatic compounds	Not Available	M+H
metab_5483	125.06	4.48615	3-Hydroxybenzyl alcohol	HMDB0059712;HMDB0038331	3-Hydroxybenzyl alcohol;3-Hydroxybenzyl alcohol glucoside	124.0524295;286.10525293	620-24-6	C7H8O2	C03351	3-Hydroxybenzyl alcohol;3-Hydroxybenzenemethanol	-	-	-	-	-	-		Benzenoids	Benzene and substituted derivatives	Benzyl alcohols	M+H
metab_5487	304.117	4.48955	Claussequinone	LMPK12080051			-	C16H14O5	-	-	-	-	-	-	-	-		-	-	-	M+NH4
metab_5533	265.143	4.57137	(10R,11R)-Pterosin L	HMDB0035874	(10R,11R)-Pterosin L	264.136	41411-04-5	C15H20O4	-	-	-	-	-	-	-	-		Benzenoids	Indanes	Indanones	M+H
metab_5571	327.158	4.63255	Phenol, 2-methoxy-4-[3-methyl-5-[(1E)-1-propen-1-yl]-2-benzofuranyl]-	-	-	-	-	C19H18O3	-	-	-	-	-	-	-	-		-	-	-	M+CH3OH+H
metab_5620	319.044	4.74403	IRIGENOL	-	-	-	-	C15H10O8	-	-	-	-	-	-	-	-		-	-	-	M+H
metab_5639	438.238	4.76645	Lunarine	-	-	-	-	C25H31N3O4	C10603	Lunarine	-	-	-	-	-	-		-	-	-	M+H
metab_5644	238.107	4.7731	6-[(E)-3,4-dihydroxypent-1-enyl]pyran-2-one	-	-	-	-	C10H12O4	-	-	-	-	-	-	-	-		-	-	-	M+ACN+H
metab_5648	178.086	4.78023	Tyrosine methyl ester	-	-	-	-	C10H13NO3	-	-	-	-	-	-	-	-		-	-	-	M+H-H2O
metab_5665	374.217	4.8135	MJPW00050	;MJPW00050			-	C16H28O7	-	-	-	-	-	-	-	-		-	-	-	M+ACN+H
metab_5673	213.102	4.83065	DIPHENYLUREA	HMDB0032066	Carbanilide	212.095	-	C13H12N2O	-	-	-	-	-	-	-	-		Benzenoids	Benzene and substituted derivatives	Not Available	M+H
metab_5675	640.275	4.83065	N2,N2-Dimethylguanosine	HMDB0004824	N2,N2-Dimethylguanosine	311.123	2140-67-2	C12H17N5O5	-	-	-	-	-	-	-	-		Nucleosides, nucleotides, and analogues	Purine nucleosides	Not Available	2M+NH4
metab_5689	274.201	4.8553	1,4-dioxacyclohexadecane-5,16-dione	-	-	-	-	C14H24O4	-	-	-	-	-	-	-	-		-	-	-	M+NH4
metab_5697	203.106	4.86655	1-(3-ethyl-2,4-dihydroxy-6-methoxyphenyl)butan-1-one	-	-	-	-	C13H18O4	-	-	-	-	-	-	-	-		-	-	-	M+H-2H2O
metab_5698	287.054	4.86655	Luteolin	LMPK12110006;HMDB0005800	Luteolin	286.048	491-70-3	C15H10O6	C01514	Luteolin;3',4',5,7-Tetrahydroxyflavone;5,7,3',4'-Tetrahydroxyflavone	-	-	map01100;map00941;map01110;map00944	Metabolic pathways; Flavonoid biosynthesis; Biosynthesis of secondary metabolites; Flavone and flavonol biosynthesis	Metabolism;Metabolism;Metabolism;Metabolism	Global and overview maps;Biosynthesis of other secondary metabolites;Global and overview maps;Biosynthesis of other secondary metabolites		Phenylpropanoids and polyketides	Flavonoids	Flavones	M+H
metab_5708	257.044	4.8835	MJAW00411	;MJAW00411			-	C12H10O5	-	-	-	-	-	-	-	-		-	-	-	M+Na
metab_5716	219.101	4.89343	(2R)-8-ethyl-7-hydroxy-5-methoxy-2-methyl-2,3-dihydrochromen-4-one	-	-	-	-	C13H16O4	-	-	-	-	-	-	-	-		-	-	-	M+H-H2O
metab_5830	165.054	5.09135	M-Coumaric acid	HMDB0125104;HMDB0001713	3-(3-hydroxyphenyl)prop-2-enoic acid;m-Coumaric acid	164.047344118;164.047344122	14755-02-3	C9H8O3	C12621	trans-3-Hydroxycinnamate;(2E)-3-(3-Hydroxyphenyl)prop-2-enoate	-	-	map01100;map00360	Metabolic pathways; Phenylalanine metabolism	Metabolism;Metabolism	Global and overview maps;Amino acid metabolism		Phenylpropanoids and polyketides	Cinnamic acids and derivatives	Hydroxycinnamic acids and derivatives	M+H
metab_5840	197.081	5.101	Atraric acid	-	-	-	-	C10H12O4	-	-	-	-	-	-	-	-		-	-	-	M+H
metab_5845	379.099	5.10603	Asperuloside	-	-	-	-	C18H22O11	C09769	Asperuloside	-	-	map01110;map00902	Biosynthesis of secondary metabolites; Monoterpenoid biosynthesis	Metabolism;Metabolism	Global and overview maps;Metabolism of terpenoids and polyketides		-	-	-	M+H-2H2O
metab_5846	433.112	5.10603	Isovitexin	LMPK12110338			-	C21H20O10	C01714	Isovitexin;Saponaretin;Apigenin-6-C-glucoside;6-C-Glucosylapigenin;Apigenin 6-C-glucoside	-	-	map00944	Flavone and flavonol biosynthesis	Metabolism	Biosynthesis of other secondary metabolites		-	-	-	M+H
metab_5853	253.143	5.12568	Frequentin	-	-	-	-	C14H20O4	-	-	-	-	-	-	-	-		-	-	-	M+H
metab_5862	203.179	5.1599	(1S,4R)-7-Isopropyl-1,4-dimethyl-1,2,3,3a,4,5,6,8a-octahydro-1,4-azulenediol	-	-	-	-	C15H26O2	-	-	-	-	-	-	-	-		-	-	-	M+H-2H2O
metab_5873	339.107	5.18485	Alpha-Hydrojuglone 4-O-b-D-glucoside	HMDB0034242	alpha-Hydrojuglone 4-O-b-D-glucoside	338.1	39015-63-9	C16H18O8	-	-	-	-	-	-	-	-		Organic oxygen compounds	Organooxygen compounds	Carbohydrates and carbohydrate conjugates	M+H
metab_5901	481.138	5.23353	Luteolin-6-C-glucoside	HMDB0127356	2-(3,4-dihydroxyphenyl)-5,7-dihydroxy-6-[3,4,5-trihydroxy-6-(hydroxymethyl)oxan-2-yl]-4H-chromen-4-one	448.101	-	C21H20O11	-	-	-	-	-	-	-	-		Phenylpropanoids and polyketides	Flavonoids	Flavonoid glycosides	M+CH3OH+H
metab_5908	175.075	5.25115	1,2-Dihydroxy-8-methylnaphthalene	-	-	-	-	C11H10O2	C14084	1,2-Dihydroxy-8-methylnaphthalene	-	-	-	-	-	-		-	-	-	M+H
metab_5917	469.133	5.26307	Methyl 2-{[6-O-(beta-D-xylopyranosyl)-beta-D-glucopyranosyl]oxy}benzoate	-	-	-	-	C19H26O12	-	-	-	-	-	-	-	-		-	-	-	M+Na
metab_5919	333.06	5.27178	2'-Deoxyinosine-5'-monophosphate	-	-	-	-	C10H13N4O7P	-	-	-	-	-	-	-	-		-	-	-	M+H
metab_5972	197.117	5.36818	Benzenemethanol, 2-(2-hydroxypropoxy)-3-methyl-	-	-	-	-	C11H16O3	-	-	-	-	-	-	-	-		-	-	-	M+H
metab_5973	252.159	5.37292	Jasmonic Acid	HMDB0032797;LMFA02020001	Jasmonic acid	210.126	59366-47-1	C12H18O3	C08491	(-)-Jasmonic acid;Jasmonic acid;{(1R,2R)-3-Oxo-2-[(Z)pent-2-enyl]cyclopent-2-enyl}acetic acid;Jasmonate;(-)-Jasmonate	-	-	map01100;map00592;map01110;map04075	Metabolic pathways; alpha-Linolenic acid metabolism; Biosynthesis of secondary metabolites; Plant hormone signal transduction	Metabolism;Metabolism;Metabolism;Environmental Information Processing	Global and overview maps;Lipid metabolism;Global and overview maps;Signal transduction		Lipids and lipid-like molecules	Fatty Acyls	Lineolic acids and derivatives	M+ACN+H
metab_6039	265.097	5.4842	Perlolyrine	HMDB0030327	Perlolyrine	264.09	29700-20-7	C16H12N2O2	C09231	Perlolyrine	-	-	-	-	-	-		Alkaloids and derivatives	Harmala alkaloids	Not Available	M+H
metab_6086	240.138	5.5831	Rolipram	-	-	-	-	C16H21NO3	-	-	-	-	-	-	-	-		-	-	-	M+H-2H2O
metab_6111	211.169	5.62723	7-Tridecynoic acid	LMFA01030600			-	C13H22O2	-	-	-	-	-	-	-	-		-	-	-	M+H
metab_6122	433.112	5.64213	Genistin	HMDB0033988;LMPK12050166	Genistin	432.106	529-59-9	C21H20O10	C09126	Genistein 7-O-beta-D-glucoside;Genistein	-	-	map00943	Isoflavonoid biosynthesis	Metabolism	Biosynthesis of other secondary metabolites		Phenylpropanoids and polyketides	Isoflavonoids	Isoflavonoid O-glycosides	M+H
metab_6138	347.075	5.66775	Cytidine-3',5'-cyclicmonophosphate	-	-	-	-	C9H12N3O7P	-	-	-	-	-	-	-	-		-	-	-	M+ACN+H
metab_6152	485.333	5.70225	Dynorphin A (6-8)	HMDB0012932	Dynorphin A (6-8)	443.297	-	C18H37N9O4	-	-	-	-	-	-	-	-		Organic acids and derivatives	Carboxylic acids and derivatives	Amino acids, peptides, and analogues	M+ACN+H
metab_6191	234.112	5.7818	N-(3-Oxobutyl)-tyrosine	-	-	-	-	C13H17NO4	-	-	-	-	-	-	-	-		-	-	-	M+H-H2O
metab_6202	639.191	5.79757	Demethoxycentaureidin 7-O-rutinoside	-	-	-	-	C29H34O16	-	-	-	-	-	-	-	-		-	-	-	M+H
metab_6209	146.06	5.81498	4-formyl Indole	-	-	-	-	C9H7NO	-	-	-	-	-	-	-	-		-	-	-	M+H
metab_6262	239.164	5.8909	(9R,13R)-1a,1b-dihomo-jasmonic acid	LMFA02010010			-	C14H22O3	-	-	-	-	-	-	-	-		-	-	-	M+H
metab_6269	514.139	5.89807	3,4,5-trihydroxy-6-(2-oxoethoxy)oxane-2-carboxylic acid	HMDB0142000	3,4,5-trihydroxy-6-(2-oxoethoxy)oxane-2-carboxylic acid	236.053	-	C8H12O8	-	-	-	-	-	-	-	-		Organic oxygen compounds	Organooxygen compounds	Carbohydrates and carbohydrate conjugates	2M+ACN+H
metab_6271	343.117	5.90573	Ethanone, 1-[1-(beta-D-glucopyranosyloxy)-8-hydroxy-3-methyl-2-naphthalenyl]-	-	-	-	-	C19H22O8	-	-	-	-	-	-	-	-		-	-	-	M+H-2H2O
metab_6284	242.175	5.922	Methyl jasmonate	LMFA02020010;HMDB0036583	Methyl jasmonate	224.141	1211-29-6	C13H20O3	C11512	Methyl jasmonate;(-)-Methyl jasmonate	-	-	map00592;map01110	alpha-Linolenic acid metabolism; Biosynthesis of secondary metabolites	Metabolism;Metabolism	Lipid metabolism;Global and overview maps		Lipids and lipid-like molecules	Fatty Acyls	Lineolic acids and derivatives	M+NH4
metab_6289	191.07	5.93105	HYMECROMONE METHYL ETHER	-	-	-	-	C11H10O3	-	-	-	-	-	-	-	-		-	-	-	M+H
metab_6306	137.06	5.95337	Terrein	-	-	-	-	C8H10O3	-	-	-	-	-	-	-	-		-	-	-	M+H-H2O
metab_6319	345.107	5.97307	2-Descarboxy-betanidin	-	-	-	-	C17H16N2O6	C17757	2-Descarboxy-betanidin	-	-	map00965	Betalain biosynthesis	Metabolism	Biosynthesis of other secondary metabolites		-	-	-	M+H
metab_6339	509.216	6.00198	10-Dab	-	-	-	-	C29H36O10	-	-	-	-	-	-	-	-		-	-	-	M+H-2H2O
metab_6343	241.086	6.00877	8-(1,2-dihydroxy-3-methylbut-3-enyl)-7-methoxychromen-2-one	-	-	-	-	C15H16O5	-	-	-	-	-	-	-	-		-	-	-	M+H-2H2O
metab_6362	455.147	6.03578	3-(2-Methyl-2H-chromen-3-yl)-acrylic acid	-	-	-	-	C13H12O3	-	-	-	-	-	-	-	-		-	-	-	2M+Na
metab_6380	382.258	6.05343	2,3-dihydroxypropyl 3-hydroxytetradecanoate	-	-	-	-	C17H34O5	-	-	-	-	-	-	-	-		-	-	-	M+ACN+Na
metab_6381	460.217	6.05343	4-Allylphenyl 6-O-(6-deoxy-alpha-L-mannopyranosyl)-beta-D-glucopyranoside	-	-	-	-	C21H30O10	-	-	-	-	-	-	-	-		-	-	-	M+NH4
metab_6383	663.317	6.05343	Oxonitine	-	-	-	-	C33H43NO12	-	-	-	-	-	-	-	-		-	-	-	M+NH4
metab_6416	314.138	6.10112	(E)-3-(4-hydroxy-3-methoxyphenyl)-N-[2-(4-hydroxyphenyl)ethyl]prop-2-enamide	-	-	-	-	C18H19NO4	-	-	-	-	-	-	-	-		-	-	-	M+H
metab_6420	163.075	6.10467	Methyl cinnamate	HMDB0033833	Methyl cinnamate	162.068	103-26-4	C10H10O2	C06358	Methyl cinnamate;3-Phenyl-2-propenoic acid methyl	-	-	-	-	-	-		Phenylpropanoids and polyketides	Cinnamic acids and derivatives	Cinnamic acid esters	M+H
metab_6422	262.216	6.10467	Humulenol II	HMDB0038212	Humulenol II	220.183	19888-00-7	C15H24O	-	-	-	-	-	-	-	-		Lipids and lipid-like molecules	Prenol lipids	Sesquiterpenoids	M+ACN+H
metab_6423	307.096	6.10467	5-Methyl-2-thiouridine	-	-	-	-	C10H14N2O5S	-	-	-	-	-	-	-	-		-	-	-	M+CH3OH+H
metab_6464	228.102	6.14282	Alpha-Aminodiphenylacetic acid	-	-	-	-	C14H13NO2	-	-	-	-	-	-	-	-		-	-	-	M+H
metab_6466	256.096	6.14282	2(1H)-Quinolinone, 3,4-dihydro-3,4-dihydroxy-4-phenyl-	-	-	-	-	C15H13NO3	-	-	-	-	-	-	-	-		-	-	-	M+H
metab_6472	349.237	6.14282	Traversianal	-	-	-	-	C20H28O3	-	-	-	-	-	-	-	-		-	-	-	M+CH3OH+H
metab_6507	412.305	6.18093	Leukotriene B4 ethanolamide	HMDB0002304	Leukotriene B4 ethanolamide	379.272	877459-63-7	C22H37NO4	-	-	-	-	-	-	-	-		Organic nitrogen compounds	Organonitrogen compounds	Amines	M+CH3OH+H
metab_6539	133.101	6.20155	P-Mentha-1,3,5,8-tetraene	HMDB0029641	p-Mentha-1,3,5,8-tetraene	132.094	1195-32-0	C10H12	-	-	-	-	-	-	-	-		Benzenoids	Benzene and substituted derivatives	Phenylpropenes	M+H
metab_6554	271.06	6.21733	3-(4-hydroxy-5-oxo-3-phenyl-2H-furan-2-yl)propanoic acid	-	-	-	-	C13H12O5	-	-	-	-	-	-	-	-		-	-	-	M+Na
metab_6555	274.273	6.21733	C16 Sphinganine	LMSP01040001			-	C16H35NO2	C13915	Hexadecasphinganine	-	-	-	-	-	-		-	-	-	M+H
metab_6568	478.337	6.2312	5-(hydroxymethyl)-3-(1-hydroxy-4-methylhexyl)oxolan-2-one	-	-	-	-	C12H22O4	-	-	-	-	-	-	-	-		-	-	-	2M+NH4
metab_6575	331.08	6.23818	Malvidin	LMPK12010004;HMDB0131420	3,5,7-trihydroxy-2-(4-hydroxy-3,5-dimethoxyphenyl)-1位鈦?chromen-1-ylium	331.082	-	C17H14O7	C08716	Malvidin;Malvidin chloride	-	-	-	-	-	-		Phenylpropanoids and polyketides	Flavonoids	O-methylated flavonoids	M+H
metab_6577	301.07	6.2427	Diosmetin	LMPK12110824;HMDB0029676	Diosmetin	300.063	520-34-3	C16H12O6	C10038	Diosmetin;Luteolin 4'-methyl ether	-	-	-	-	-	-		Phenylpropanoids and polyketides	Flavonoids	O-methylated flavonoids	M+H
metab_6578	313.237	6.2427	8,13-dihydroxy-9,11-octadecadienoic acid	LMFA02000166			-	C18H32O4	-	-	-	-	-	-	-	-		-	-	-	M+H
metab_6607	746.318	6.26625	GalNAcFucGlcNAcThrNAc-II	-	-	-	-	C28H47N3O18	-	-	-	-	-	-	-	-		-	-	-	M+CH3OH+H
metab_6645	248.164	6.29633	7-Oxomeptazinol	-	-	-	-	C15H21NO2	-	-	-	-	-	-	-	-		-	-	-	M+H
metab_6652	575.401	6.30035	Isoleucyl-Arginine	HMDB0028901	Isoleucyl-Arginine	287.196	-	C12H25N5O3	-	-	-	-	-	-	-	-		Organic acids and derivatives	Carboxylic acids and derivatives	Amino acids, peptides, and analogues	2M+H
metab_6710	385.091	6.3618	Daphnoretin	-	-	-	-	C19H12O7	C09216	Daphnoretin	-	-	-	-	-	-		-	-	-	M+CH3OH+H
metab_6724	364.32	6.37878	DL-Palmitoylcarnitine	-	-	-	-	C23H45NO4	-	-	-	-	-	-	-	-		-	-	-	M+H-2H2O
metab_6729	279.093	6.38378	Triphenylphosphine oxide	-	-	-	-	C18H15OP	-	-	-	-	-	-	-	-		-	-	-	M+H
metab_6736	330.336	6.38682	N,N-dimethyl-Safingol	LMSP01080056			-	C20H43NO2	-	-	-	-	-	-	-	-		-	-	-	M+H
metab_6786	151.112	6.45072	2,4,7-decatrienal	LMFA06000060			-	C10H14O	-	-	-	-	-	-	-	-		-	-	-	M+H
metab_6789	295.226	6.45072	12,13-Epoxy-9,15-octadecadienoic acid	HMDB0031088	12,13-Epoxy-9,15-octadecadienoic acid	294.219	88159-18-6	C18H30O3	-	-	-	-	-	-	-	-		Lipids and lipid-like molecules	Fatty Acyls	Fatty acids and conjugates	M+H
metab_6791	487.304	6.45072	Hydrocortisone cypionate	LMST02030121			-	C29H42O6	C08176	Hydrocortisone cypionate	-	-	-	-	-	-		-	-	-	M+H
metab_6794	237.185	6.45778	3,7-Epoxycaryophyllan-6-One	-	-	-	-	C15H24O2	-	-	-	-	-	-	-	-		-	-	-	M+H
metab_6855	251.237	6.53677	Cis-9,19-epoxy-3Z,6Z-heptadecadiene	LMFA12000272			-	C17H30O	-	-	-	-	-	-	-	-		-	-	-	M+H
metab_6884	345.242	6.58832	Mepregnol	-	-	-	-	C22H32O3	-	-	-	-	-	-	-	-		-	-	-	M+H
metab_6891	355.284	6.59628	2-Linoleoyl Glycerol	-	-	-	-	C21H38O4	-	-	-	-	-	-	-	-		-	-	-	M+H
metab_6905	221.153	6.6217	Oblongolide	-	-	-	-	C14H20O2	C09519	Oblongolide	-	-	-	-	-	-		-	-	-	M+H
metab_6937	357.278	6.67335	4,8,12,15,19,21-tetracosahexaenoic acid	LMFA01030186			-	C24H36O2	-	-	-	-	-	-	-	-		-	-	-	M+H
metab_6955	233.153	6.69948	Alantolactone	LMPR0103190013;HMDB0035906	Alantolactone	232.146	546-43-0	C15H20O2	C09289	Alantolactone	-	-	-	-	-	-		Lipids and lipid-like molecules	Prenol lipids	Terpene lactones	M+H
metab_6969	377.229	6.72028	Grayanotoxane-3,5,6,10,14,16-hexol, 14-acetate, (3beta,6beta,14R,16alpha)-	-	-	-	-	C22H36O7	-	-	-	-	-	-	-	-		-	-	-	M+H-2H2O
metab_6975	217.158	6.73008	3-Hydroxy-5-isopropylidene-3,8-dimethyl-2,3,3a,4,5,8a-hexahydro-6(1H)-azulenone	-	-	-	-	C15H22O2	-	-	-	-	-	-	-	-		-	-	-	M+H-H2O
metab_6983	179.143	6.74347	4-Methyl-1-phenyl-2-pentanol	HMDB0031568	4-Methyl-1-phenyl-2-pentanol	178.136	7779-78-4	C12H18O	-	-	-	-	-	-	-	-		Benzenoids	Benzene and substituted derivatives	Not Available	M+H
metab_6990	245.138	6.75267	MJPW00111	;MJPW00111			-	C12H22O6	-	-	-	-	-	-	-	-		-	-	-	M+H-H2O
metab_6993	181.122	6.75703	Dihydroactinidiolide	HMDB0035240	Dihydroactinidiolide	180.115	15356-74-8	C11H16O2	-	-	-	-	-	-	-	-		Organoheterocyclic compounds	Benzofurans	Not Available	M+H
metab_6994	192.084	6.75703	2-Butylbenzothiazole	HMDB0040031	2-Butylbenzothiazole	191.077	54798-95-7	C11H13NS	-	-	-	-	-	-	-	-		Organoheterocyclic compounds	Benzothiazoles	Not Available	M+H
metab_7001	151.112	6.76753	(+)-(S)-Carvone	HMDB0004487;MJDBOTE0000292	(S)-Carvone	150.104	-	C10H14O	C11383	(+)-(S)-Carvone;Carvol;(+)-Carvone;Carvone	-	-	map01110;map00903;map00902	Biosynthesis of secondary metabolites; Limonene and pinene degradation; Monoterpenoid biosynthesis	Metabolism;Metabolism;Metabolism	Global and overview maps;Metabolism of terpenoids and polyketides;Metabolism of terpenoids and polyketides		Lipids and lipid-like molecules	Prenol lipids	Monoterpenoids	M+H
metab_7005	425.206	6.77155	Bufalin	LMST01130001			-	C24H34O4	C16922	Bufalin	Steroids	24-Carbon atoms	-	-	-	-		-	-	-	M+K
metab_7013	241.195	6.77963	1,2-Dimethyl-4-(6-methyl-4-heptenyl)-1,3-cyclohexadiene	HMDB0037740	1,2-Dimethyl-4-(6-methyl-4-heptenyl)-1,3-cyclohexadiene	218.203	-	C16H26	-	-	-	-	-	-	-	-		Hydrocarbons	Unsaturated hydrocarbons	Branched unsaturated hydrocarbons	M+Na
metab_7014	263.236	6.7845	Farnesyl acetone	-	-	-	-	C18H30O	-	-	-	-	-	-	-	-		-	-	-	M+H
metab_7047	387.288	6.82207	HU-210	-	-	-	-	C25H38O3	-	-	-	-	-	-	-	-		-	-	-	M+H
metab_7114	306.206	6.94958	(E)-N-[(4-hydroxy-3-methoxyphenyl)methyl]-8-methylnon-6-enamide	-	-	-	-	C18H27NO3	-	-	-	-	-	-	-	-		-	-	-	M+H
metab_7122	558.295	6.96295	MJAW00088	;MJAW00088			-	C26H50NO7P	-	-	-	-	-	-	-	-		-	-	-	M+K
metab_7149	412.341	7.01313	Isooctanedioldibutyrate	HMDB0061936	Isooctanedioldibutyrate	286.214	345288-81-5	C10H22O2	-	-	-	-	-	-	-	-		Lipids and lipid-like molecules	Fatty Acyls	Fatty acid esters	2M+ACN+Na
metab_7179	571.366	7.06108	25-Hydroxyvitamin D2-25-glucuronide	HMDB0010342	25-Hydroxyvitamin D2-25-glucuronide	588.366	-	C34H52O8	-	-	-	-	-	-	-	-		Lipids and lipid-like molecules	Steroids and steroid derivatives	Vitamin D and derivatives	M+H-H2O
metab_7219	607.254	7.10583	Bilibubin	;MJDBOTE0000479			-	C33H36N4O6	-	-	-	-	-	-	-	-		-	-	-	M+Na
metab_7225	433.292	7.13495	Latanoprost	HMDB0014792	Latanoprost	432.288	130209-82-4	C26H40O5	-	-	-	-	-	-	-	-		Lipids and lipid-like molecules	Fatty Acyls	Eicosanoids	M+H
metab_7231	380.315	7.14668	2-methoxy-4-pentadecylbenzoic acid	-	-	-	-	C23H38O3	-	-	-	-	-	-	-	-		-	-	-	M+NH4
metab_7237	393.314	7.1525	Gamma-Tocotrienol	HMDB0012958;LMPR02020057	gamma-Tocotrienol	410.318	14101-61-2	C28H42O2	C14155	gamma-Tocotrienol	-	-	map01100;map00130;map01110	Metabolic pathways; Ubiquinone and other terpenoid-quinone biosynthesis; Biosynthesis of secondary metabolites	Metabolism;Metabolism;Metabolism	Global and overview maps;Metabolism of cofactors and vitamins;Global and overview maps		Lipids and lipid-like molecules	Prenol lipids	Quinone and hydroquinone lipids	M+H-H2O
metab_7238	427.32	7.1525	(22E,24E)-1alpha,25-dihydroxy-22,23,24,24a-tetradehydro-24a-homovitamin D3	LMST03020314			-	C28H42O3	-	-	-	-	-	-	-	-		-	-	-	M+H
metab_7247	714.389	7.16053	Cis-10-Hydroxylinalyl oxide 7-glucoside	HMDB0033236	cis-10-Hydroxylinalyl oxide 7-glucoside	348.178	219814-36-5	C16H28O8	-	-	-	-	-	-	-	-		Organic oxygen compounds	Organooxygen compounds	Carbohydrates and carbohydrate conjugates	2M+NH4
metab_7291	320.2	7.23168	Bakuchiol	-	-	-	-	C18H24O	-	-	-	-	-	-	-	-		-	-	-	M+ACN+Na
metab_7321	546.435	7.27047	Arachidonyl carnitine	HMDB0006455	Arachidonoylcarnitine	447.335	-	C31H54NO4+	-	-	-	-	-	-	-	-		Lipids and lipid-like molecules	Fatty Acyls	Fatty acid esters	M+ACN+H
metab_7329	429.335	7.2822	(3beta,5alpha,6alpha,22E,24R)-Ergosta-7,9(11),22-triene-3,5,6-triol	HMDB0032108	(3beta,5alpha,6alpha,22E,24R)-Ergosta-7,9(11),22-triene-3,5,6-triol	428.329	71097-07-9	C28H44O3	-	-	-	-	-	-	-	-		Lipids and lipid-like molecules	Steroids and steroid derivatives	Ergostane steroids	M+H
metab_7339	683.412	7.29073	23-trans-p-Coumaroyloxytormentic acid	HMDB0040682	23-trans-p-Coumaroyloxytormentic acid	650.382	144604-14-8	C39H54O8	-	-	-	-	-	-	-	-		Lipids and lipid-like molecules	Prenol lipids	Triterpenoids	M+CH3OH+H
metab_7341	297.289	7.29523	Palmitic amide	HMDB0012273	Palmitic amide	255.256	629-54-9	C16H33NO	-	-	-	-	-	-	-	-		Lipids and lipid-like molecules	Fatty Acyls	Fatty amides	M+ACN+H
metab_7377	184.169	7.35288	11-aminoundecanoicacid	-	-	-	-	C11H23NO2	-	-	-	-	-	-	-	-		-	-	-	M+H-H2O
metab_7401	312.232	7.4143	1-Methyl-2-[(6Z)-6-undecen-1-yl]-4(1H)-quinolinone	-	-	-	-	C21H29NO	-	-	-	-	-	-	-	-		-	-	-	M+H
metab_7420	472.378	7.4441	(5xi,9xi,13xi,18xi,19beta)-3-Oxolup-20(29)-en-28-oic acid	-	-	-	-	C30H46O3	-	-	-	-	-	-	-	-		-	-	-	M+NH4
metab_7480	284.294	7.55958	(2S,3R)-2-aminooctadecane-1,3-diol	HMDB0000269	Sphinganine	301.298	764-22-7	C18H39NO2	C00836	Sphinganine;Dihydrosphingosine;2-Amino-1,3-dihydroxyoctadecane	-	-	map00600;map01100	Sphingolipid metabolism; Metabolic pathways	Metabolism;Metabolism	Lipid metabolism;Global and overview maps		Organic nitrogen compounds	Organonitrogen compounds	Amines	M+H-H2O
metab_7535	457.367	7.68195	Soyasapogenol E	HMDB0034652	Soyasapogenol E	456.36	6750-59-0	C30H48O3	C17420	Soyasapogenol E	-	-	-	-	-	-		Lipids and lipid-like molecules	Prenol lipids	Triterpenoids	M+H
metab_7578	427.357	7.76643	(3beta,23E)-3-Hydroxy-27-norcycloart-23-en-25-one	HMDB0037382	(3beta,23E)-3-Hydroxy-27-norcycloart-23-en-25-one	426.35	132943-49-8	C29H46O2	-	-	-	-	-	-	-	-		Lipids and lipid-like molecules	Steroids and steroid derivatives	Cycloartanols and derivatives	M+H
metab_7600	554.513	7.83782	Palmitic Acid	LMFA01010001;HMDB0000220	Palmitic acid	256.24	1957-10-03	C16H32O2	C00249	Hexadecanoic acid;Hexadecanoate;Hexadecylic acid;Palmitic acid;Palmitate;Cetylic acid	Lipids	Fatty acids	map01100;map00071;map01212;map00073;map00061;map00062;map01040	Metabolic pathways; Fatty acid degradation; Fatty acid metabolism; Cutin, suberine and wax biosynthesis; Fatty acid biosynthesis; Fatty acid elongation; Biosynthesis of unsaturated fatty acids	Metabolism;Metabolism;Metabolism;Metabolism;Metabolism;Metabolism;Metabolism	Global and overview maps;Lipid metabolism;Global and overview maps;Lipid metabolism;Lipid metabolism;Lipid metabolism;Lipid metabolism		Lipids and lipid-like molecules	Fatty Acyls	Fatty acids and conjugates	2M+ACN+H
metab_7623	325.288	7.91412	CocamidopropylBetaine	-	-	-	-	C19H38N2O3	-	-	-	-	-	-	-	-		-	-	-	M+H-H2O
metab_7648	407.294	7.98237	(E)-5,8-Megastigmadien-4-one	HMDB0034671	(E)-5,8-Megastigmadien-4-one	192.151	67401-26-7	C13H20O	-	-	-	-	-	-	-	-		Organic oxygen compounds	Organooxygen compounds	Carbonyl compounds	2M+Na
metab_7691	104.107	8.17618	Choline	HMDB0000097	Choline	104.108	62-49-7	C5H13NO	C00114	Choline;Bilineurine	-	-	map01100;map00564;map02010;map00260	Metabolic pathways; Glycerophospholipid metabolism; ABC transporters; Glycine, serine and threonine metabolism	Metabolism;Metabolism;Environmental Information Processing;Metabolism	Global and overview maps;Lipid metabolism;Membrane transport;Amino acid metabolism		Organic nitrogen compounds	Organonitrogen compounds	Quaternary ammonium salts	M+H
metab_7708	152.118	8.22285	2-Methyl-5-(2-propenyl)pyrazine	HMDB0039993	2-Methyl-5-(2-propenyl)pyrazine	134.084	55138-63-1	C8H10N2	-	-	-	-	-	-	-	-		Organoheterocyclic compounds	Diazines	Pyrazines	M+NH4
metab_7719	607.29	8.28463	2-Deacetoxy taxinine B	-	-	-	-	C35H42O9	-	-	-	-	-	-	-	-		-	-	-	M+H
metab_7744	98.0716	8.38152	Deoxycytosine	-	-	-	-	C4H7N3	C02026	Deoxycytosine;2'-Deoxycytosine	-	-	-	-	-	-		-	-	-	M+H
metab_7752	595.396	8.40093	(3b,5a,22E,24S)-Stigmasta-7,22,25-trien-3-ol 3-glucoside	HMDB0033089	(3b,5a,22E,24S)-Stigmasta-7,22,25-trien-3-ol 3-glucoside	572.408	99782-87-3	C35H56O6	-	-	-	-	-	-	-	-		Lipids and lipid-like molecules	Steroids and steroid derivatives	Stigmastanes and derivatives	M+Na
metab_7783	481.366	8.51903	3-Acetoxyolean-12-en-23-oic acid	-	-	-	-	C32H50O4	-	-	-	-	-	-	-	-		-	-	-	M+H-H2O
metab_7804	136.112	8.63692	(Z)-3-aminonon-5-enoic acid	-	-	-	-	C9H17NO2	-	-	-	-	-	-	-	-		-	-	-	M+H-2H2O
metab_7812	134.096	8.66092	Norephedrine	HMDB0001942	Phenylpropanolamine	151.1	-	C9H13NO	C02343	(+)-Norephedrine;d-Norephedrine;Norephedrine	-	-	-	-	-	-		Benzenoids	Benzene and substituted derivatives	Phenylpropanes	M+H-H2O
metab_7826	340.357	8.67998	Docosanamide	LMFA08010020;HMDB0000583	Docosanamide	339.35	3061-75-4	C22H45NO	-	-	-	-	-	-	-	-		Lipids and lipid-like molecules	Fatty Acyls	Fatty amides	M+H
metab_7829	570.508	8.68327	DG(15:0/16:1(9Z)/0:0)	HMDB0007070	DG(15:0/16:1(9Z)/0:0)	552.475	-	C34H64O5	-	-	-	-	-	-	-	-		Lipids and lipid-like molecules	Glycerolipids	Diradylglycerols	M+NH4
metab_7832	153.113	8.69222	Histamine	HMDB0000870	Histamine	111.08	51-45-6	C5H9N3	C00388	Histamine;1H-Imidazole-4-ethanamine;2-(4-Imidazolyl)ethylamine	Peptides;Hormones and transmitters;Hormones and transmitters	Amines;Other hormones;Neurotransmitters	map01100;map00340;map01110	Metabolic pathways; Histidine metabolism; Biosynthesis of secondary metabolites	Metabolism;Metabolism;Metabolism	Global and overview maps;Amino acid metabolism;Global and overview maps		Organic nitrogen compounds	Organonitrogen compounds	Amines	M+ACN+H
metab_7839	699.489	8.71358	PA(14:1(9Z)/22:2(13Z,16Z))	LMGP10010134;HMDB0114805	PA(14:1(9Z)/22:2(13Z,16Z))	698.489	-	C39H71O8P	-	-	-	-	-	-	-	-		Lipids and lipid-like molecules	Glycerophospholipids	Glycerophosphates	M+H
metab_8269	337.273	8.81067	Mesterolone	LMST02020107;HMDB0006036;MJDBOTE0000981	Mesterolone	304.24	1424-00-6	C20H32O2	D04947	-	-	-	-	-	-	-		Lipids and lipid-like molecules	Steroids and steroid derivatives	Androstane steroids	M+CH3OH+H
metab_8324	422.293	8.76183	7,12-Diketolithocholic acid	;MJDBDZS0000044			-	C24H36O5	-	-	-	-	-	-	-	-		-	-	-	M+NH4
metab_8353	303.304	8.74472	Erucic acid	HMDB0002068;MJDBOTE0000504	Erucic acid	338.318	112-86-7	C22H42O2	C08316	Erucic acid;(13Z)-Docosenoic acid;cis-13-Docosenoic acid	Lipids	Fatty acids	map01040	Biosynthesis of unsaturated fatty acids	Metabolism	Lipid metabolism		Lipids and lipid-like molecules	Fatty Acyls	Fatty acids and conjugates	M+H-2H2O
metab_8398	552.498	8.68327	Cer(d16:1(4E)/18:1(9Z)(2OH))	LMSP02010083			-	C34H65NO4	-	-	-	-	-	-	-	-		-	-	-	M+H
metab_8399	212.143	8.68327	Methoxetamine	-	-	-	-	C15H21NO2	-	-	-	-	-	-	-	-		-	-	-	M+H-2H2O
metab_8400	141.113	8.68327	Methenamine	HMDB0029598	Metenamine	140.106	-	C6H12N4	-	-	-	-	-	-	-	-		Organoheterocyclic compounds	Triazinanes	1,3,5-triazinanes	M+H
metab_8423	108.081	8.65615	Stachydrine	HMDB0004827;MJDBOTE0001084	Proline betaine	143.095	471-87-4	C7H13NO2	C10172	Stachydrine;Proline betaine;L-Proline betaine	-	-	-	-	-	-		Organic acids and derivatives	Carboxylic acids and derivatives	Amino acids, peptides, and analogues	M+H-2H2O
metab_8427	88.0761	8.65285	2-(1-Aziridinyl)ethanol	-	-	-	-	C4H9NO	C19332	2-(1-Aziridinyl)ethanol;1-Aziridineethanol	-	-	-	-	-	-		-	-	-	M+H
metab_8430	164.143	8.64485	Benzyldiethylamine	-	-	-	-	C11H17N	-	-	-	-	-	-	-	-		-	-	-	M+H
metab_8448	540.462	8.57763	DG(8:0/19:0/0:0)	HMDB0092937	DG(8:0/19:0/0:0)	498.428	-	C30H58O5	-	-	-	-	-	-	-	-		Lipids and lipid-like molecules	Glycerolipids	Diradylglycerols	M+ACN+H
metab_8454	483.382	8.54953	(3beta,11alpha,13beta)-3,11,13-Oleananetriol	HMDB0034521	(3beta,11alpha,13beta)-3,11,13-Oleananetriol	460.392	85643-69-2	C30H52O3	-	-	-	-	-	-	-	-		Lipids and lipid-like molecules	Prenol lipids	Triterpenoids	M+Na
metab_8462	421.346	8.51903	Brassicasterol	HMDB0011181;LMST01030098	Brassicasterol	398.355	474-67-9	C28H46O	C08813	Brassicasterol	-	-	map01100;map01110;map00100	Metabolic pathways; Biosynthesis of secondary metabolites; Steroid biosynthesis	Metabolism;Metabolism;Metabolism	Global and overview maps;Global and overview maps;Lipid metabolism		Lipids and lipid-like molecules	Steroids and steroid derivatives	Ergostane steroids	M+Na
metab_8479	540.534	8.47983	Cer(d18:0/16:0)	HMDB0011760;LMSP02020001	Cer(d18:0/16:0)	539.528	5966-29-0	C34H69NO3	-	-	-	-	-	-	-	-		Lipids and lipid-like molecules	Sphingolipids	Ceramides	M+H
metab_8511	165.113	8.38152	4,6-dimethylpyrimidin-2-amine	-	-	-	-	C6H9N3	-	-	-	-	-	-	-	-		-	-	-	M+ACN+H
metab_8529	83.0608	8.37168	4-Methylimidazole	-	-	-	-	C4H6N2	C19262	4-Methylimidazole	-	-	-	-	-	-		-	-	-	M+H
metab_8565	295.226	8.22965	10-Oxo-11-octadecen-13-olide	HMDB0029786	10-Oxo-11-octadecen-13-olide	294.219	-	C18H30O3	-	-	-	-	-	-	-	-		Phenylpropanoids and polyketides	Macrolides and analogues	Not Available	M+H
metab_8570	423.325	8.21645	1-Phenyl-1,3-heneicosanedione	HMDB0035585	1-Phenyl-1,3-heneicosanedione	400.334	-	C27H44O2	-	-	-	-	-	-	-	-		Organic oxygen compounds	Organooxygen compounds	Carbonyl compounds	M+Na
metab_8597	499.378	8.17282	3,7-Epoxycaryophyllan-6-Ol	-	-	-	-	C15H26O2	-	-	-	-	-	-	-	-		-	-	-	2M+Na
metab_8603	493.388	8.15963	DG(8:0/17:0/0:0)	HMDB0092927	DG(8:0/17:0/0:0)	470.397	-	C28H54O5	-	-	-	-	-	-	-	-		Lipids and lipid-like molecules	Glycerolipids	Diradylglycerols	M+Na
metab_8604	176.105	8.15963	(2-propan-2-ylphenyl) N-methylcarbamate	-	-	-	-	C11H15NO2	-	-	-	-	-	-	-	-		-	-	-	M+H-H2O
metab_8620	81.0451	8.12362	Pyrimidine	HMDB0003361	Pyrimidine	80.0374	25247-63-6	C4H4N2	C00396	Pyrimidine;Pyrimidine base	-	-	-	-	-	-		Organoheterocyclic compounds	Diazines	Pyrimidines and pyrimidine derivatives	M+H
metab_8658	546.451	7.98237	(Z)-7-Hexadecen-1,16-olide	HMDB0031086	(Z)-7-Hexadecen-1,16-olide	252.209	123-69-3	C16H28O2	-	-	-	-	-	-	-	-		Phenylpropanoids and polyketides	Macrolides and analogues	Not Available	2M+ACN+H
metab_8665	429.088	7.97228	Demeclocycline	HMDB0014756	Demeclocycline	464.099	127-33-3	C21H21ClN2O8	-	-	-	-	-	-	-	-		Phenylpropanoids and polyketides	Tetracyclines	Not Available	M+H-2H2O
metab_8670	497.361	7.96355	Soyasapogenol	-	-	-	-	C30H50O4	-	-	-	-	-	-	-	-		-	-	-	M+Na
metab_8687	343.299	7.92503	Ursocholanic Acid	-	-	-	-	C24H40O2	C19642	5beta-Cholanic acid;Ursocholanic acid	-	-	-	-	-	-		-	-	-	M+H-H2O
metab_8715	457.366	7.872	(+-)-Ethyl 3-hydroxy-2-methylbutyrate	HMDB0032256	(+-)-Ethyl 3-hydroxy-2-methylbutyrate	456.36	27372-03-8	C30H48O3	-	-	-	-	-	-	-	-		Lipids and lipid-like molecules	Steroids and steroid derivatives	Vitamin D and derivatives	M+H
metab_8775	429.276	7.75345	2-methyl-2-(3-pentadecylphenoxy)propanoic acid	-	-	-	-	C25H42O3	-	-	-	-	-	-	-	-		-	-	-	M+K
metab_8823	395.367	7.68195	Stigmasterol	LMST01040123;HMDB0000937	Stigmasterol	412.371	83-48-7	C29H48O	C05442	Stigmasterol	Steroids	29-Carbon atoms	map01110;map00100	Biosynthesis of secondary metabolites; Steroid biosynthesis	Metabolism;Metabolism	Global and overview maps;Lipid metabolism		Lipids and lipid-like molecules	Steroids and steroid derivatives	Stigmastanes and derivatives	M+H-H2O
metab_8857	525.354	7.62843	Psychosine	LMSP07000001;HMDB0000648	Galactosylsphingosine	461.335	-	C24H47NO7	C01747	Psychosine;Galactosylsphingosine;O-Galactosylsphingosine	-	-	map00600	Sphingolipid metabolism	Metabolism	Lipid metabolism		Lipids and lipid-like molecules	Sphingolipids	Glycosphingolipids	M+ACN+Na
metab_8887	314.247	7.59432	1-methyl-2-undecylquinolin-4-one	-	-	-	-	C21H31NO	-	-	-	-	-	-	-	-		-	-	-	M+H
metab_8919	409.309	7.56287	MG(0:0/24:6(6Z,9Z,12Z,15Z,18Z,21Z)/0:0)	HMDB0011560	MG(0:0/24:6(6Z,9Z,12Z,15Z,18Z,21Z)/0:0)	444.324	-	C28H44O4	-	-	-	-	-	-	-	-		Lipids and lipid-like molecules	Glycerolipids	Monoradylglycerols	M+H-2H2O
metab_8924	461.362	7.55958	(20S)-1alpha,20,25-trihydroxy-26,27-dimethyl-24a-homovitamin D3	LMST03020475			-	C29H48O4	-	-	-	-	-	-	-	-		-	-	-	M+H
metab_8938	560.371	7.54583	Be-43547B	-	-	-	-	C31H51N3O7	-	-	-	-	-	-	-	-		-	-	-	M+H-H2O
metab_8954	210.149	7.53712	C8-homoserine lactone	-	-	-	-	C12H21NO3	-	-	-	-	-	-	-	-		-	-	-	M+H-H2O
metab_8980	108.081	7.50672	2,6-Dimethylpyridine	HMDB0032972	2,6-Dimethylpyridine	107.073	108-48-5	C7H9N	-	-	-	-	-	-	-	-		Organoheterocyclic compounds	Pyridines and derivatives	Methylpyridines	M+H
metab_9039	443.351	7.44785	1alpha,25-dihydroxy-26,27-ethanovitamin D3	LMST03020408			-	C29H46O3	-	-	-	-	-	-	-	-		-	-	-	M+H
metab_9041	1000.68	7.43898	Surfactin	-	-	-	-	C53H93N7O13	C12043	Surfactin	-	-	-	-	-	-		-	-	-	M+H-2H2O
metab_9050	463.281	7.42563	3-Phenylpropyl isovalerate	HMDB0036389	3-Phenylpropyl isovalerate	220.146	5452-07-03	C14H20O2	-	-	-	-	-	-	-	-		Lipids and lipid-like molecules	Fatty Acyls	Fatty acid esters	2M+Na
metab_9090	469.329	7.38075	Quillaic acid	LMPR0106150037;MJDBOTE0000240			-	C30H46O5	C08972	Quillaic acid	-	-	-	-	-	-		-	-	-	M+H-H2O
metab_9105	198.185	7.35288	Cis-Quinceoxepane	HMDB0038108	cis-Quinceoxepane	180.151	133005-51-3	C12H20O	-	-	-	-	-	-	-	-		Organoheterocyclic compounds	Oxepanes	Not Available	M+NH4
metab_9117	509.324	7.32597	2-Arachidonoylglycerophosphocholine	-	-	-	-	C28H51NO7P+	-	-	-	-	-	-	-	-		-	-	-	M+H-2H2O
metab_9146	333.242	7.30772	Oxymetholone	-	-	-	-	C21H32O3	C07393	Oxymetholone	-	-	-	-	-	-		-	-	-	M+H
metab_9152	986.661	7.29947	Surfactin B	-	-	-	-	C52H91N7O13	-	-	-	-	-	-	-	-		-	-	-	M+H-2H2O
metab_9186	639.432	7.27768	Sporidesmolide I	-	-	-	-	C33H58N4O8	-	-	-	-	-	-	-	-		-	-	-	M+H
metab_9239	150.128	7.2395	2,6-Diethylaniline	HMDB0032782	2,6-Diethylaniline	149.12	579-66-8	C10H15N	C11001	2,6-Diethylaniline;DEA	-	-	-	-	-	-		Benzenoids	Benzene and substituted derivatives	Aniline and substituted anilines	M+H
metab_9320	300.289	7.16053	Palmitoyl Ethanolamide	LMFA08040013;HMDB0002100;LMFA08040057	Palmitoylethanolamide	299.282	-	C18H37NO2	C16512	Palmitoylethanolamide;Palmidrol	-	-	-	-	-	-		Organic acids and derivatives	Carboximidic acids and derivatives	Carboximidic acids	M+H
metab_9326	685.47	7.1525	Enniatin A1	-	-	-	-	C35H61N3O9	-	-	-	-	-	-	-	-		-	-	-	M+NH4
metab_9394	650.571	7.10108	DG(15:0/20:1(11Z)/0:0)	HMDB0007079	DG(15:0/20:1(11Z)/0:0)	608.538	-	C38H72O5	-	-	-	-	-	-	-	-		Lipids and lipid-like molecules	Glycerolipids	Diradylglycerols	M+ACN+H
metab_9407	331.224	7.08937	Gestodene metabolite	-	-	-	-	C21H30O3	-	-	-	-	-	-	-	-		-	-	-	M+H
metab_9432	322.077	7.07322	Mmv676053	-	-	-	-	C18H16ClN3O3	-	-	-	-	-	-	-	-		-	-	-	M+H-2H2O
metab_9501	392.279	7.01313	MG(0:0/18:4(6Z,9Z,12Z,15Z)/0:0)	HMDB0011541	MG(0:0/18:4(6Z,9Z,12Z,15Z)/0:0)	350.246	-	C21H34O4	-	-	-	-	-	-	-	-		Lipids and lipid-like molecules	Fatty Acyls	Lineolic acids and derivatives	M+ACN+H
metab_9569	357.278	6.95385	(all-Z)-7,10,13-Docosatrienoic acid	HMDB0031099	(all-Z)-7,10,13-Docosatrienoic acid	334.287	28874-30-8	C22H38O2	-	-	-	-	-	-	-	-		Lipids and lipid-like molecules	Fatty Acyls	Fatty acids and conjugates	M+Na
metab_9585	279.062	6.93907	(2R)-2-[(1E,3E)-5-Hydroxy-1,3-pentadien-1-yl]-2,3-dihydro-1-benzofuran-5,7-diol	-	-	-	-	C13H14O4	-	-	-	-	-	-	-	-		-	-	-	M+2Na-H
metab_9591	258.185	6.93455	Pramoxine	-	-	-	-	C17H27NO3	C07892	Pramoxine;Pramocaine	-	-	-	-	-	-		-	-	-	M+H-2H2O
metab_9635	412.341	6.8908	(卤)-Hydroxycitronellol	HMDB0030083	(卤)-Hydroxycitronellol	174.162	-	C10H22O2	-	-	-	-	-	-	-	-		Lipids and lipid-like molecules	Fatty Acyls	Fatty alcohols	2M+ACN+Na
metab_9660	332.258	6.87147	Stanolone	LMST02020042;HMDB0002961;MJDBOTE0001000	Dihydrotestosterone	290.225	-	C19H30O2	C03917	Dihydrotestosterone;17beta-Hydroxyandrostan-3-one;Androstanolone;17beta-Hydroxy-5alpha-androstan-3-one	Steroids;Hormones and transmitters	19-Carbon atoms;Steroid hormones	-	-	-	-		Lipids and lipid-like molecules	Steroids and steroid derivatives	Androstane steroids	M+ACN+H
metab_9712	356.278	6.82937	10,11-dihydro-leukotriene B4	LMFA03020045;HMDB0012504	10,11-dihydro-leukotriene B4	338.246	-	C20H34O4	-	-	-	-	-	-	-	-		Lipids and lipid-like molecules	Fatty Acyls	Eicosanoids	M+NH4
metab_9760	459.346	6.79747	(3beta,5alpha,9alpha,22E,24R)-3,5,9-Trihydroxy-23-methylergosta-7,22-dien-6-one	HMDB0032669	(3beta,5alpha,9alpha,22E,24R)-3,5,9-Trihydroxy-23-methylergosta-7,22-dien-6-one	458.34	211486-12-3	C29H46O4	-	-	-	-	-	-	-	-		Lipids and lipid-like molecules	Steroids and steroid derivatives	Ergostane steroids	M+H
metab_9769	332.164	6.79127	(2-(4,4-dimethyl-4,5-dihydrooxazol-2-yl)-5-fluorophenyl)(phenyl)methanol	-	-	-	-	C18H18FNO2	-	-	-	-	-	-	-	-		-	-	-	M+CH3OH+H
metab_9774	355.283	6.78793	1-Linoleoyl Glycerol	-	-	-	-	C21H38O4	-	-	-	-	-	-	-	-		-	-	-	M+H
metab_9778	446.347	6.7845	Sorbitane Monooleate	-	-	-	-	C24H44O6	-	-	-	-	-	-	-	-		-	-	-	M+NH4
metab_9790	290.211	6.77583	3-oxo-C14 homoserine lactone	-	-	-	-	C18H31NO4	-	-	-	-	-	-	-	-		-	-	-	M+H-2H2O
metab_9796	371.279	6.77155	Aphidicolin	-	-	-	-	C20H34O4	C06088	Aphidicolin	-	-	map00904;map01110	Diterpenoid biosynthesis; Biosynthesis of secondary metabolites	Metabolism;Metabolism	Metabolism of terpenoids and polyketides;Global and overview maps		-	-	-	M+CH3OH+H
metab_9809	184.073	6.7623	Phosphocholine	HMDB0001565	Phosphorylcholine	184.074	-	C5H14NO4P	C00588	Choline phosphate;Phosphorylcholine;Phosphocholine;O-Phosphocholine	-	-	map01100;map00564	Metabolic pathways; Glycerophospholipid metabolism	Metabolism;Metabolism	Global and overview maps;Lipid metabolism		Organic nitrogen compounds	Organonitrogen compounds	Quaternary ammonium salts	M+H
metab_9855	267.171	6.72555	Myristic acid	LMFA01010014;HMDB0000806	Myristic acid	228.209	544-63-8	C14H28O2	C06424	Tetradecanoic acid;Tetradecanoate;Myristic acid	Lipids	Fatty acids	map01100;map00061	Metabolic pathways; Fatty acid biosynthesis	Metabolism;Metabolism	Global and overview maps;Lipid metabolism		Lipids and lipid-like molecules	Fatty Acyls	Fatty acids and conjugates	M+K
metab_9865	619.381	6.70987	Astaxanthin	LMPR01070263;HMDB0002204;MJDBOTE0001149	Astaxanthin	596.387	472-61-7	C40H52O4	C08580	Astaxanthin;(3S,3'S)-Astaxanthin;(3S,3'S)-3,3'-Dihydroxy-beta,beta-carotene-4,4'-dione	-	-	map00906;map01110	Carotenoid biosynthesis; Biosynthesis of secondary metabolites	Metabolism;Metabolism	Metabolism of terpenoids and polyketides;Global and overview maps		Lipids and lipid-like molecules	Prenol lipids	Tetraterpenoids	M+Na
metab_9869	398.326	6.70987	MG(0:0/20:3(8Z,11Z,14Z)/0:0)	HMDB0011547	MG(0:0/20:3(8Z,11Z,14Z)/0:0)	380.293	-	C23H40O4	-	-	-	-	-	-	-	-		Lipids and lipid-like molecules	Endocannabinoids	Not Available	M+NH4
metab_9871	358.294	6.70987	N-palmitoyl threonine	LMFA08020107			-	C20H39NO4	-	-	-	-	-	-	-	-		-	-	-	M+H
metab_9873	284.237	6.70987	1,3-Octadiene	HMDB0040966	1,3-Octadiene	110.11	1002-33-1	C8H14	-	-	-	-	-	-	-	-		Hydrocarbons	Unsaturated hydrocarbons	Olefins	2M+ACN+Na
metab_9879	397.269	6.705	Lithochol-11-Enic Acid	-	-	-	-	C24H38O3	-	-	-	-	-	-	-	-		-	-	-	M+Na
metab_9888	477.336	6.69948	1alpha,25-dihydroxy-24a-homo-26,27-dimethyl-22-thiavitamin D3	LMST03020423			-	C29H48O3S	-	-	-	-	-	-	-	-		-	-	-	M+H
metab_9892	205.158	6.69948	2-Benzylidene-1-heptanol	HMDB0036170	2-Benzylidene-1-heptanol	204.151	101-85-9	C14H20O	-	-	-	-	-	-	-	-		Phenylpropanoids and polyketides	Cinnamyl alcohols	Not Available	M+H
metab_9902	341.206	6.69595	(5Z,8Z,12E,14Z,17Z)-11-hydroxyicosa-5,8,12,14,17-pentaenoic acid	-	-	-	-	C20H30O3	-	-	-	-	-	-	-	-		-	-	-	M+Na
metab_9914	358.095	6.69242	3,3',4',5-tetrahydroxy-7-methoxyflavone	HMDB0133823	2-(3,4-dihydroxyphenyl)-3,5-dihydroxy-7-methoxy-4H-chromen-4-one	316.058	-	C16H12O7	C10176	Rhamnetin;Quercetin 7-methyl ether	-	-	-	-	-	-		Phenylpropanoids and polyketides	Flavonoids	Flavones	M+ACN+H
metab_9915	356.079	6.69242	12-hydroxy-5,7,9,20-tetraoxahexacyclo[11.7.0.0虏,鹿鈦?0鲁,鈦?0鈦?鈦?0鹿鈦?鹿鈦竇icosa-1(13),2(10),11,14(18)-tetraene-17,19-dione	HMDB0126141	12-hydroxy-5,7,9,20-tetraoxahexacyclo[11.7.0.0虏,鹿鈦?0鲁,鈦?0鈦?鈦?0鹿鈦?鹿鈦竇icosa-1(13),2(10),11,14(18)-tetraene-17,19-dione	314.043	-	C16H10O7	-	-	-	-	-	-	-	-		Phenylpropanoids and polyketides	Coumarins and derivatives	Difurocoumarins	M+ACN+H
metab_9933	411.191	6.68337	Carda-5,20(22)-dienolide, 3,14-dihydroxy-, (3beta,9xi)-	-	-	-	-	C23H32O4	-	-	-	-	-	-	-	-		-	-	-	M+K
metab_9968	165.091	6.66128	Hinokitiol	HMDB0035213	beta-Thujaplicin	164.084	499-44-5	C10H12O2	C09904	beta-Thujaplicin;Hinokitiol;4-Isopropyltropolone	-	-	-	-	-	-		Hydrocarbon derivatives	Tropones	Tropolones	M+H
metab_9981	193.122	6.65127	5-[(E)-3-hydroxy-3-methylbut-1-enyl]-2-methylcyclohex-5-ene-1,2,4-triol	-	-	-	-	C12H20O4	-	-	-	-	-	-	-	-		-	-	-	M+H-2H2O
metab_10027	249.148	6.6107	Glechomafuran	HMDB0036772	Glechomafuran	248.141	38146-67-7	C15H20O3	-	-	-	-	-	-	-	-		Lipids and lipid-like molecules	Prenol lipids	Sesquiterpenoids	M+H
metab_10039	191.143	6.60082	Megastigmatrienone	HMDB0059906	Megastigmatrienone	190.136	-	C13H18O	-	-	-	-	-	-	-	-		Organic oxygen compounds	Organooxygen compounds	Carbonyl compounds	M+H
metab_10055	125.096	6.60082	2E,6E-Octadienal	LMFA06000131			-	C8H12O	-	-	-	-	-	-	-	-		-	-	-	M+H
metab_10063	170.096	6.59628	Diphenylamine	HMDB0032562	Diphenylamine	169.089	122-39-4	C12H11N	C11016	Diphenylamine;N,N-Diphenylamine	-	-	-	-	-	-		Benzenoids	Benzene and substituted derivatives	Aniline and substituted anilines	M+H
metab_10070	225.102	6.59317	Pyrrolo[1,2-a]pyrazine-1,4-dione, hexahydro-3-[(4-hydroxyphenyl)methyl]-	-	-	-	-	C14H16N2O3	-	-	-	-	-	-	-	-		-	-	-	M+H-2H2O
metab_10081	471.309	6.58232	17,23-Epoxy-29-hydroxy-27-norlanost-8-ene-3,15,24-trione	HMDB0035113	17,23-Epoxy-29-hydroxy-27-norlanost-8-ene-3,15,24-trione	470.303	-	C29H42O5	-	-	-	-	-	-	-	-		Lipids and lipid-like molecules	Prenol lipids	Triterpenoids	M+H
metab_10111	367.247	6.56777	6,18,19-Trihydroxytrachyloban-2-one	-	-	-	-	C20H30O4	-	-	-	-	-	-	-	-		-	-	-	M+CH3OH+H
metab_10115	389.228	6.56777	3-Methylthiofentanyl	HMDB0061718	3-Methylthiofentanyl	356.192	-	C21H28N2OS	-	-	-	-	-	-	-	-		Benzenoids	Benzene and substituted derivatives	Anilides	M+CH3OH+H
metab_10117	301.106	6.56777	Beta-D-Glucopyranoside, (3Z)-3-hexen-1-yl	-	-	-	-	C12H22O6	-	-	-	-	-	-	-	-		-	-	-	M+K
metab_10130	197.059	6.56077	3-Hydroxy-2-phenyl-2,3,3a,7a-tetrahydro-5H-furo[3,2-b]pyran-5-one	-	-	-	-	C13H12O4	-	-	-	-	-	-	-	-		-	-	-	M+H-2H2O
metab_10134	449.325	6.55378	(6R)-6,19-epidioxy-1alpha,25-dihydroxy-6,19-dihydrovitamin D3	LMST03020302			-	C27H44O5	-	-	-	-	-	-	-	-		-	-	-	M+H
metab_10176	233.19	6.53677	(Z)-8-Tetradecenal	HMDB0032526	(Z)-8-Tetradecenal	210.198	169054-69-7	C14H26O	-	-	-	-	-	-	-	-		Lipids and lipid-like molecules	Fatty Acyls	Fatty aldehydes	M+Na
metab_10182	588.425	6.5298	Myxovirescin	-	-	-	-	C35H61NO8	-	-	-	-	-	-	-	-		-	-	-	M+H-2H2O
metab_10184	457.221	6.5298	Rac-5,6-Epoxy-retinoyl-beta-D-glucuronide	HMDB0060123	rac-5,6-Epoxy-retinoyl-beta-D-glucuronide	492.236	-	C26H36O9	-	-	-	-	-	-	-	-		Lipids and lipid-like molecules	Prenol lipids	Terpene glycosides	M+H-2H2O
metab_10188	364.283	6.5298	3Beta-Hydroxy-23,24-Bisnorchol-5-Enic Acid	-	-	-	-	C22H34O3	-	-	-	-	-	-	-	-		-	-	-	M+NH4
metab_10190	268.096	6.5298	2,3-Dihydro-6-Methoxy-4-Methyl-2-Hydroxyethylfuro[3,2-c]quinoline	-	-	-	-	C14H15NO3	-	-	-	-	-	-	-	-		-	-	-	M+Na
metab_10191	233.226	6.5298	Methyl palmitoleate	-	-	-	-	C17H32O2	-	-	-	-	-	-	-	-		-	-	-	M+H-2H2O
metab_10192	200.107	6.5298	(5S)-5-Acetyl-1-benzyl-2-pyrrolidinone	-	-	-	-	C13H15NO2	-	-	-	-	-	-	-	-		-	-	-	M+H-H2O
metab_10196	181.158	6.52382	3,6,8-dodecatrien-1-ol	LMFA05000058			-	C12H20O	-	-	-	-	-	-	-	-		-	-	-	M+H
metab_10198	495.19	6.52027	3,4,5-trihydroxy-6-[(14-hydroxy-3-methyl-1,7-dioxo-3,4,5,6,7,8,9,10-octahydro-1H-2-benzoxacyclotetradecin-16-yl)oxy]oxane-2-carboxylic acid	HMDB0134196	3,4,5-trihydroxy-6-[(14-hydroxy-3-methyl-1,7-dioxo-3,4,5,6,7,8,9,10-octahydro-1H-2-benzoxacyclotetradecin-16-yl)oxy]oxane-2-carboxylic acid	494.179	-	C24H30O11	-	-	-	-	-	-	-	-		Phenylpropanoids and polyketides	Macrolides and analogues	Zearalenones	M+H
metab_10204	476.277	6.51428	1-palmitoyl-2-hydroxy-sn-glycero-3-phosphoethanolamine	HMDB0011503	LysoPE(16:0/0:0)	453.286	-	C21H44NO7P	-	-	-	-	-	-	-	-		Lipids and lipid-like molecules	Glycerophospholipids	Glycerophosphoethanolamines	M+Na
metab_10257	314.341	6.4753	2-amino-14,16-dimethyloctadecan-3-ol	LMSP01080031			-	C20H43NO	-	-	-	-	-	-	-	-		-	-	-	M+H
metab_10272	322.2	6.47028	Tetradecanedioic acid	LMFA01170018;HMDB0000872;MJDBOTE0000681	Tetradecanedioic acid	258.183	821-38-5	C14H26O4	C11002	Isofenphos	-	-	-	-	-	-		Lipids and lipid-like molecules	Fatty Acyls	Fatty acids and conjugates	M+ACN+Na
metab_10334	544.335	6.45072	(2-hydroxy-3-octadec-9-enoyloxypropyl) 2-(trimethylazaniumyl)ethyl phosphate	-	-	-	-	C26H52NO7P	-	-	-	-	-	-	-	-		-	-	-	M+Na
metab_10359	340.299	6.44422	1-(3-Methylbutyl)-cyclopentene	HMDB0061800	1-(3-Methylbutyl)-cyclopentene	138.141	-	C10H18	-	-	-	-	-	-	-	-		Hydrocarbons	Unsaturated hydrocarbons	Branched unsaturated hydrocarbons	2M+ACN+Na
metab_10370	461.287	6.43468	Hydrocortisone caproate	HMDB0032489;LMST02030129	Prenyl caproate	184.146	-	C27H40O6	C13422	Hydrocortisone caproate;[2-(11,17-Dihydroxy-10,13-dimethyl-3-oxo-1,2,6,7,8,9,10,11,12,13,14,15,16,17-tetradecahydrocyclopenta[a]phenanthren-17-yl)-2-oxo-ethyl]hexanoate	-	-	-	-	-	-		Lipids and lipid-like molecules	Fatty Acyls	Fatty acid esters	M+H
metab_10395	524.37	6.41682	[(2R)-3-hydroxy-2-octadecanoyloxypropyl] 2-(trimethylazaniumyl)ethyl phosphate	;MJDBWX000002020			-	C26H54NO7P	-	-	-	-	-	-	-	-		-	-	-	M+H
metab_10401	432.237	6.41033	Eplerenone	HMDB0014838	Eplerenone	414.204	107724-20-9	C24H30O6	C12512	Eplerenone	-	-	-	-	-	-		Lipids and lipid-like molecules	Steroids and steroid derivatives	Steroid lactones	M+NH4
metab_10409	121.065	6.41033	P-Tolualdehyde	HMDB0029638	4-Methylbenzaldehyde	120.058	104-87-0	C8H8O	C06758	p-Tolualdehyde;p-Methylbenzaldehyde;4-Methylbenzaldehyde;4-Toluylaldehyde;p-Formyltoluene	-	-	map01100	Metabolic pathways	Metabolism	Global and overview maps		Benzenoids	Benzene and substituted derivatives	Benzoyl derivatives	M+H
metab_10411	93.0702	6.41033	Toluene	HMDB0034168	Toluene	92.0626	108-88-3	C7H8	C01455	Toluene;Methylbenzene;Toluol	-	-	map01100	Metabolic pathways	Metabolism	Global and overview maps		Benzenoids	Benzene and substituted derivatives	Toluenes	M+H
metab_10470	163.075	6.37878	2H-Oxecin-2-one, 5,8,9,10-tetrahydro-5,8-dihydroxy-10-methyl-, (3Z,6E)-	-	-	-	-	C10H14O4	-	-	-	-	-	-	-	-		-	-	-	M+H-2H2O
metab_10567	242.117	6.33447	Ribalinine	-	-	-	-	C15H17NO3	-	-	-	-	-	-	-	-		-	-	-	M+H-H2O
metab_10575	328.284	6.33043	Avocadene	LMFA05000639;HMDB0031042	Avocadene	286.251	83797-45-9	C17H34O3	-	-	-	-	-	-	-	-		Lipids and lipid-like molecules	Fatty Acyls	Fatty alcohols	M+ACN+H
metab_10578	305.174	6.33043	Prosolanapyrone II	-	-	-	-	C18H24O4	C19933	Prosolanapyrone II	-	-	-	-	-	-		-	-	-	M+H
metab_10594	275.164	6.3189	Walleminone	-	-	-	-	C15H24O3	-	-	-	-	-	-	-	-		-	-	-	M+Na
metab_10607	439.172	6.31083	Secoeremopetasitolide B	HMDB0041363	Secoeremopetasitolide B	394.199	178402-71-6	C21H30O7	-	-	-	-	-	-	-	-		Lipids and lipid-like molecules	Prenol lipids	Terpene lactones	M+2Na-H
metab_10617	361.091	6.30387	Aflatoxin G1	HMDB0030474;HMDB0030479	Aflatoxin G;Aflatoxin M1	328.058302738;328.058302738	1165-39-5	C17H12O7	C16755	Aflatoxin G1	-	-	map01110;map00254	Biosynthesis of secondary metabolites; Aflatoxin biosynthesis	Metabolism;Metabolism	Global and overview maps;Biosynthesis of other secondary metabolites		Phenylpropanoids and polyketides	Coumarins and derivatives	Furanocoumarins	M+CH3OH+H
metab_10637	441.153	6.29633	6a,12a-Didehydroamorphigenin	LMPK12060063			-	C23H20O7	-	-	-	-	-	-	-	-		-	-	-	M+CH3OH+H
metab_10640	388.305	6.29633	3-hydroxytetradecanoyl carnitine	HMDB0061640	3-Hydroxytetradecanoyl carnitine	387.298	282523-64-2	C21H41NO5	-	-	-	-	-	-	-	-		Lipids and lipid-like molecules	Fatty Acyls	Fatty acid esters	M+H
metab_10660	465.117	6.28583	Silibinin	HMDB0040513;HMDB0030583	2,3-Dehydrosilybin;Silibinin	480.10564686;482.121296924	22888-70-6	C25H22O10	C07610	Silymarin;Silibinin;Silybin	-	-	-	-	-	-		Lignans, neolignans and related compounds	Flavonolignans	Not Available	M+H-H2O
metab_10692	371.112	6.27378	3,5-Dihydroxy-2-(4-hydroxyphenyl)-3,4-dihydro-2H-chromen-7-yl pentofuranoside	-	-	-	-	C20H22O9	-	-	-	-	-	-	-	-		-	-	-	M+H-2H2O
metab_10713	377.231	6.26625	HDOPA	LMST02030225;HMDB0011652	11beta-Hydroxy-3,20-dioxopregn-4-en-21-oic acid	376.225	-	C22H32O5	-	-	-	-	-	-	-	-		Lipids and lipid-like molecules	Steroids and steroid derivatives	Androstane steroids	M+H
metab_10719	316.284	6.2593	6-hydroxysphingosine	LMSP01080003			-	C18H37NO3	-	-	-	-	-	-	-	-		-	-	-	M+H
metab_10728	383.112	6.25578	Aloin	HMDB0035219	Aloin	418.126	8015-61-0	C21H22O9	C10305	Barbaloin;Aloin;Aloin A	-	-	-	-	-	-		Benzenoids	Anthracenes	Not Available	M+H-2H2O
metab_10738	421.258	6.2487	6'beta-Hydroxylovastatin	-	-	-	-	C24H36O6	-	-	-	-	-	-	-	-		-	-	-	M+H
metab_10871	453.341	6.18743	Olean-12-en-28-oic acid, 2,3,19-trihydroxy-, (2alpha,3beta,5xi,9xi,19alpha)-	-	-	-	-	C30H48O5	-	-	-	-	-	-	-	-		-	-	-	M+H-2H2O
metab_10988	344.148	6.14282	Eucalyptin	LMPK12111028			-	C19H18O5	-	-	-	-	-	-	-	-		-	-	-	M+NH4
metab_10994	230.095	6.14282	Ergothioneine	HMDB0003045	Ergothioneine	229.088	497-30-3	C9H15N3O2S	C05570	Ergothioneine	-	-	map01100;map00340	Metabolic pathways; Histidine metabolism	Metabolism;Metabolism	Global and overview maps;Amino acid metabolism		Organic acids and derivatives	Carboxylic acids and derivatives	Amino acids, peptides, and analogues	M+H
metab_10998	159.08	6.14282	5-[(E)-but-1-enyl]-4-methoxy-6-methylpyran-2-one	-	-	-	-	C11H14O3	-	-	-	-	-	-	-	-		-	-	-	M+H-2H2O
metab_11008	239.164	6.13978	Xi-5-Hydroxydodecanoic acid	HMDB0040169;LMFA01050529	xi-5-Hydroxydodecanoic acid	216.173	7779-95-5	C12H24O3	-	-	-	-	-	-	-	-		Lipids and lipid-like molecules	Fatty Acyls	Fatty acids and conjugates	M+Na
metab_11030	303.243	6.12878	5-Nonyloxytryptamine	-	-	-	-	C19H30N2O	-	-	-	-	-	-	-	-		-	-	-	M+H
metab_11033	681.212	6.12477	Lithospermoside	;MJDBOTE0001225			-	C14H19NO8	C17771	Lithospermoside;Griffonin	-	-	-	-	-	-		-	-	-	2M+Na
metab_11034	659.232	6.12477	2-amino-4-({1-[(carboxymethyl)-C-hydroxycarbonimidoyl]-2-{[2-(3,4-dimethoxyphenyl)-1-{[2-(3,4-dimethoxyphenyl)ethyl]-C-hydroxycarbonimidoyl}-2-hydroxyethyl]sulfanyl}ethyl}-C-hydroxycarbonimidoyl)butanoic acid	HMDB0135489	2-amino-4-({1-[(carboxymethyl)-C-hydroxycarbonimidoyl]-2-{[2-(3,4-dimethoxyphenyl)-1-{[2-(3,4-dimethoxyphenyl)ethyl]-C-hydroxycarbonimidoyl}-2-hydroxyethyl]sulfanyl}ethyl}-C-hydroxycarbonimidoyl)butanoic acid	694.252	-	C31H42N4O12S	-	-	-	-	-	-	-	-		Organic acids and derivatives	Carboxylic acids and derivatives	Amino acids, peptides, and analogues	M+H-2H2O
metab_11067	273.111	6.11522	6-Hydroxyflavanone	-	-	-	-	C15H12O3	C14221	6-Hydroxyflavanone	-	-	-	-	-	-		-	-	-	M+CH3OH+H
metab_11139	301.118	6.0911	5-NITRO-2-PHENYLPROPYLAMINOBENZOIC ACID [NPPB]	-	-	-	-	C16H16N2O4	-	-	-	-	-	-	-	-		-	-	-	M+H
metab_11148	324.216	6.08373	Lycofawcine	-	-	-	-	C18H29NO4	C09878	Lycofawcine	-	-	-	-	-	-		-	-	-	M+H
metab_11151	253.179	6.08373	PUNCTAPORIN B	-	-	-	-	C15H24O3	-	-	-	-	-	-	-	-		-	-	-	M+H
metab_11155	540.31	6.07768	2-amino-3-[4-hydroxy-3-(3-methylbut-2-enyl)phenyl]propanoic acid	-	-	-	-	C14H19NO3	-	-	-	-	-	-	-	-		-	-	-	2M+ACN+H
metab_11233	427.136	6.03578	Zeanoside C	HMDB0038960	Zeanoside C	385.101	120293-55-2	C16H19NO10	-	-	-	-	-	-	-	-		Organoheterocyclic compounds	Benzoxazines	Not Available	M+ACN+H
metab_11243	526.17	6.02698	Malvidin-3-galactoside	-	-	-	-	C23H25O12+	-	-	-	-	-	-	-	-		-	-	-	M+CH3OH+H
metab_11261	183.078	6.01873	Triethyl phosphate	-	-	-	-	C6H15O4P	-	-	-	-	-	-	-	-		-	-	-	M+H
metab_11288	213.148	5.99765	Putaminoxin	-	-	-	-	C12H20O3	C08509	Putaminoxin	-	-	-	-	-	-		-	-	-	M+H
metab_11296	542.325	5.98682	Crocacin B	-	-	-	-	C30H40N2O6	-	-	-	-	-	-	-	-		-	-	-	M+NH4
metab_11333	447.132	5.95337	4'-Methoxy-7-O-beta-D-glucopyranosyl-8,3'-dihydroxyflavanone	-	-	-	-	C22H24O11	-	-	-	-	-	-	-	-		-	-	-	M+H-H2O
metab_11343	479.098	5.94993	3,4,5-trihydroxy-6-{1-methoxy-1,3-dioxo-3-[(3,4,5,6-tetrahydroxyoxan-2-yl)methoxy]propan-2-yl}oxane-2-carboxylic acid	HMDB0130025	3,4,5-trihydroxy-6-{1-methoxy-1,3-dioxo-3-[(3,4,5,6-tetrahydroxyoxan-2-yl)methoxy]propan-2-yl}oxane-2-carboxylic acid	456.112	-	C16H24O15	-	-	-	-	-	-	-	-		Lipids and lipid-like molecules	Saccharolipids	Not Available	M+Na
metab_11373	227.081	5.93632	Nalpha-Acetyl-L-Lysine	HMDB0000446	N-alpha-Acetyl-L-lysine	188.116	-	C8H16N2O3	C12989	N2-Acetyl-L-lysine;N(alpha)-Acetyllysine	-	-	-	-	-	-		Organic acids and derivatives	Carboxylic acids and derivatives	Amino acids, peptides, and analogues	M+K
metab_11388	397.125	5.91778	3-hydroxy-3,4-bis[(4-hydroxy-3-methoxyphenyl)methyl]oxolan-2-one	HMDB0030598	(-)-Wikstromol	374.137	34444-37-6	C20H22O7	C10725	Nortrachelogenin	-	-	-	-	-	-		Lignans, neolignans and related compounds	Furanoid lignans	Tetrahydrofuran lignans	M+Na
metab_11389	225.148	5.91778	(3E)-4-(1,2,4-Trihydroxy-2,6,6-trimethylcyclohexyl)-3-buten-2-one	-	-	-	-	C13H22O4	-	-	-	-	-	-	-	-		-	-	-	M+H-H2O
metab_11425	595.129	5.8759	CMP-N-glycoloylneuraminate	HMDB0012206	CMP-N-glycoloylneuraminate	630.142	98300-80-2	C20H31N4O17P	C03691	CMP-N-glycoloylneuraminate;CMP-N-glycolylneuraminate;CMP-Neu5Gc	-	-	map00520	Amino sugar and nucleotide sugar metabolism	Metabolism	Carbohydrate metabolism		Nucleosides, nucleotides, and analogues	Pyrimidine nucleotides	Pyrimidine ribonucleotides	M+H-2H2O
metab_11438	139.075	5.86088	4,5-dihydroxy-3-propylcyclopent-2-en-1-one	-	-	-	-	C8H12O3	-	-	-	-	-	-	-	-		-	-	-	M+H-H2O
metab_11445	297.167	5.85687	Alhpa-tocopheronic acid	LMPR02020062			-	C16H24O5	-	-	-	-	-	-	-	-		-	-	-	M+H
metab_11455	157.101	5.85687	2,6-Dimethylnaphthalene	HMDB0059764	2,6-Dimethyl-naphtalene	156.094	-	C12H12	C14330	2,6-Dimethylnaphthalene	-	-	-	-	-	-		Benzenoids	Naphthalenes	Not Available	M+H
metab_11469	810.389	5.84987	Aluminum coprogen [M+Al-2H]	-	-	-	-	C35H53AlN6O13	-	-	-	-	-	-	-	-		-	-	-	M+NH4
metab_11514	330.133	5.81498	2(5H)-Furanone, 4-(2-hydroxy-4-methoxyphenyl)-5-[(4-hydroxyphenyl)methyl]-	-	-	-	-	C18H16O5	-	-	-	-	-	-	-	-		-	-	-	M+NH4
metab_11520	449.107	5.80438	Astragalin	HMDB0037429;LMPK12111725	Astragalin	448.101	480-10-4	C21H20O11	C12249	Kaempferol 3-O-glucoside;Kaempferol 3-O-beta-D-glucoside;Astragalin	-	-	map01110;map00944	Biosynthesis of secondary metabolites; Flavone and flavonol biosynthesis	Metabolism;Metabolism	Global and overview maps;Biosynthesis of other secondary metabolites		Phenylpropanoids and polyketides	Flavonoids	Flavonoid glycosides	M+H
metab_11528	243.087	5.79757	Lumichrome	-	-	-	-	C12H10N4O2	C01727	Lumichrome;7,8-Dimethylalloxazine	-	-	map00740	Riboflavin metabolism	Metabolism	Metabolism of cofactors and vitamins		-	-	-	M+H
metab_11534	627.17	5.78533	Naringin Dihydrochalcone	HMDB0002927;MJDBOTE0001486	Naringin	580.179	-	C27H34O14	C09789	Naringin;Naringenin 7-O-neohesperidoside;Naringenin 7-O-[alpha-L-rhamnosyl-(1|right|2)-beta-D-glucoside]	-	-	map00941	Flavonoid biosynthesis	Metabolism	Biosynthesis of other secondary metabolites		Phenylpropanoids and polyketides	Flavonoids	Flavonoid glycosides	M+2Na-H
metab_11555	625.225	5.76027	1-(4-chlorophenyl)-4,4-dimethyl-2-(1,2,4-triazol-1-yl)pentan-3-ol	-	-	-	-	C15H20ClN3O	-	-	-	-	-	-	-	-		-	-	-	2M+K
metab_11562	327.122	5.7522	Isogoyazensolide	-	-	-	-	C19H22O7	-	-	-	-	-	-	-	-		-	-	-	M+H-2H2O
metab_11573	301.07	5.7322	5,7-dihydroxy-2-(4-hydroxyphenyl)-3-methoxy-4H-chromen-4-one	-	-	-	-	C16H12O6	-	-	-	-	-	-	-	-		-	-	-	M+H
metab_11691	296.112	5.59823	(2R)-2-(beta-D-Glucopyranosyloxy)-2-phenylacetamide	-	-	-	-	C14H19NO7	-	-	-	-	-	-	-	-		-	-	-	M+H-H2O
metab_11714	293.08	5.56877	4-Thiouridine	-	-	-	-	C9H12N2O5S	-	-	-	-	-	-	-	-		-	-	-	M+CH3OH+H
metab_11765	541.189	5.50862	Pralatrexate(Folotyn)	-	-	-	-	C23H23N7O5	-	-	-	-	-	-	-	-		-	-	-	M+ACN+Na
metab_11798	317.112	5.47018	Methyl 1,4-bis(beta-D-glucopyranosyloxy)-3-(3-methyl-2-buten-1-yl)-2-naphthoate	-	-	-	-	C29H38O14	-	-	-	-	-	-	-	-		-	-	-	M+H+Na
metab_11799	175.075	5.47018	4-methoxy-6-prop-2-enyl-1,3-benzodioxole	-	-	-	-	C11H12O3	-	-	-	-	-	-	-	-		-	-	-	M+H-H2O
metab_11817	495.113	5.44633	Laricitrin 3-galactoside	LMPK12112470			-	C22H22O13	-	-	-	-	-	-	-	-		-	-	-	M+H
metab_11822	230.154	5.44288	5-Methyl-2-phenyl-2-hexenal	HMDB0031855	5-Methyl-2-phenyl-2-hexenal	188.12	21834-92-4	C13H16O	-	-	-	-	-	-	-	-		Benzenoids	Benzene and substituted derivatives	Phenylacetaldehydes	M+ACN+H
metab_11834	579.17	5.42235	Eriodictyol-7-O-neohesperidoside	-	-	-	-	C27H32O15	-	-	-	-	-	-	-	-		-	-	-	M+H-H2O
metab_11853	324.143	5.40238	5-Hydroxymethylcytosine	-	-	-	-	C5H7N3O2	-	-	-	-	-	-	-	-		-	-	-	2M+ACN+H
metab_11872	273.11	5.39027	2'-O-Methyl-5-methyluridine	-	-	-	-	C11H16N2O6	-	-	-	-	-	-	-	-		-	-	-	M+H
metab_11881	141.07	5.39027	1-Naphthylmethanol	HMDB0060322	1-Hydroxymethylnaphthalene	158.073	-	C11H10O	C14089	1-Hydroxymethylnaphthalene;1-Naphthalenemethanol	-	-	-	-	-	-		Benzenoids	Naphthalenes	Not Available	M+H-H2O
metab_11883	93.0338	5.39027	5-Methyl furfural	HMDB0033002;MJDBOTE0000712	5-Methyl-2-furancarboxaldehyde	110.037	-	C6H6O2	C11115	5-Methyl-2-furaldehyde;5-Methyl-2-furfural	-	-	-	-	-	-		Organic oxygen compounds	Organooxygen compounds	Carbonyl compounds	M+H-H2O
metab_11887	567.183	5.38723	Dutasteride	HMDB0015258	Dutasteride	528.221	164656-23-9	C27H30F6N2O2	-	-	-	-	-	-	-	-		Lipids and lipid-like molecules	Steroids and steroid derivatives	Androstane steroids	M+K
metab_11894	145.065	5.38723	1-Naphthol	HMDB0012138	1-Naphthol	144.058	90-15-3	C10H8O	C11714	1-Naphthol;alpha-Naphthol	-	-	-	-	-	-		Benzenoids	Naphthalenes	Naphthols and derivatives	M+H
metab_11932	151.075	5.34127	Methyl phenylacetate	HMDB0032617	Methyl phenylacetate	150.068	101-41-7	C9H10O2	-	-	-	-	-	-	-	-		Benzenoids	Benzene and substituted derivatives	Not Available	M+H
metab_11937	159.08	5.33742	2-Methoxynaphthalene	HMDB0032861	2-Methoxynaphthalene	158.073	1993-04-09	C11H10O	-	-	-	-	-	-	-	-		Benzenoids	Naphthalenes	Not Available	M+H
metab_11963	183.065	5.30205	4-Hydroxy-3,5-dimethoxybenzaldehyde	-	-	-	-	C9H10O4	-	-	-	-	-	-	-	-		-	-	-	M+H
metab_11983	481.158	5.28423	Tyr-TyrMe-OH	-	-	-	-	C25H24N2O8	-	-	-	-	-	-	-	-		-	-	-	M+H
metab_12025	299.175	5.24165	10b-Methyl-3,4,5,6,10b,11-hexahydro-2H-4b-aza-chrysene-1,12-dione	-	-	-	-	C18H19NO2	-	-	-	-	-	-	-	-		-	-	-	M+NH4
metab_12055	169.049	5.21572	Nigrosporapyrone D	-	-	-	-	C8H8O4	-	-	-	-	-	-	-	-		-	-	-	M+H
metab_12082	307.117	5.17752	Beta-D-Glucopyranoside, 4-[(1E)-3-hydroxy-1-propen-1-yl]-2-methoxyphenyl	-	-	-	-	C16H22O8	-	-	-	-	-	-	-	-		-	-	-	M+H-2H2O
metab_12104	338.195	5.14292	N-(1,4-dihydroxy-4-methylpentan-2-yl)-3-hydroxy-5-oxo-6-phenylhexanamide	-	-	-	-	C18H27NO5	-	-	-	-	-	-	-	-		-	-	-	M+H
metab_12112	211.123	5.13615	2-(3-fluorophenyl)-4,4-dimethyl-4,5-dihydrooxazole	-	-	-	-	C11H12FNO	-	-	-	-	-	-	-	-		-	-	-	M+NH4
metab_12126	599.209	5.11518	6-{4-[3-(3,7-dimethylocta-2,6-dien-1-yl)-6,7-dihydroxy-4-oxo-4H-chromen-2-yl]-3-hydroxyphenoxy}-3,4,5-trihydroxyoxane-2-carboxylic acid	HMDB0129608	6-{4-[3-(3,7-dimethylocta-2,6-dien-1-yl)-6,7-dihydroxy-4-oxo-4H-chromen-2-yl]-3-hydroxyphenoxy}-3,4,5-trihydroxyoxane-2-carboxylic acid	598.205	-	C31H34O12	-	-	-	-	-	-	-	-		Phenylpropanoids and polyketides	Flavonoids	Flavonoid glycosides	M+H
metab_12158	552.301	5.08603	Tobramycin 1-N- or 3-N-carbamoyl	-	-	-	-	C19H38N6O10	-	-	-	-	-	-	-	-		-	-	-	M+ACN+H
metab_12167	629.219	5.07377	3'-Prenylapigenin 7-[rhamnosyl-(1->6)-glucoside]	HMDB0034634	3'-Prenylapigenin 7-[rhamnosyl-(1|right|6)-glucoside]	646.226	245054-57-3	C32H38O14	-	-	-	-	-	-	-	-		Phenylpropanoids and polyketides	Flavonoids	Flavonoid glycosides	M+H-H2O
metab_12200	245.186	5.04975	N-L-Leucyl-L-leucine	HMDB0028933	Leucylleucine	244.179	-	C12H24N2O3	C11332	Leucyl-leucine	-	-	-	-	-	-		Organic acids and derivatives	Carboxylic acids and derivatives	Amino acids, peptides, and analogues	M+H
metab_12224	282.097	5.02773	4-Hydroxyphenylacetylglutamine	-	-	-	-	C13H15NO6	-	-	-	-	-	-	-	-		-	-	-	M+H
metab_12226	180.102	5.02773	2,3-Dihydro-5-(3-hydroxypropanoyl)-1H-pyrrolizine	HMDB0040021	2,3-Dihydro-5-(3-hydroxypropanoyl)-1H-pyrrolizine	179.095	97073-09-1	C10H13NO2	-	-	-	-	-	-	-	-		Organoheterocyclic compounds	Pyrrolizines	Not Available	M+H
metab_12228	303.049	5.02437	Fuzhuanin	-	-	-	-	C15H12O8	-	-	-	-	-	-	-	-		-	-	-	M+H-H2O
metab_12239	166.122	5.01245	Capryloylglycine	HMDB0000832	Capryloylglycine	201.136	14246-53-8	C10H19NO3	-	-	-	-	-	-	-	-		Organic acids and derivatives	Carboxylic acids and derivatives	Amino acids, peptides, and analogues	M+H-2H2O
metab_12261	511.17	4.97163	Biotin	HMDB0000030	Biotin	244.088	58-85-5	C10H16N2O3S	C00120	Biotin;D-Biotin;Vitamin H;Coenzyme R	Vitamins and Cofactors	Cofactors	map01100;map00780;map02010	Metabolic pathways; Biotin metabolism; ABC transporters	Metabolism;Metabolism;Environmental Information Processing	Global and overview maps;Metabolism of cofactors and vitamins;Membrane transport		Organoheterocyclic compounds	Biotin and derivatives	Not Available	2M+Na
metab_12263	369.029	4.97163	{3,5,6-trihydroxy-2-[3-(sulfooxy)phenyl]-7H-chromen-7-ylidene}oxidanium	HMDB0130444	{3,5,6-trihydroxy-2-[3-(sulfooxy)phenyl]-7H-chromen-7-ylidene}oxidanium	368.02	-	C15H12O9S	-	-	-	-	-	-	-	-		Organic acids and derivatives	Organic sulfuric acids and derivatives	Arylsulfates	M+H
metab_12283	193.049	4.93665	Isoscopoletin	-	-	-	-	C10H8O4	C18079	Isoscopoletin	-	-	-	-	-	-		-	-	-	M+H
metab_12287	302.159	4.93332	2-Phenylethyl beta-D-glucopyranoside	HMDB0029819	2-Phenylethyl beta-D-glucopyranoside	284.126	18997-54-1	C14H20O6	-	-	-	-	-	-	-	-		Organic oxygen compounds	Organooxygen compounds	Carbohydrates and carbohydrate conjugates	M+NH4
metab_12289	479.143	4.92997	Mundulone	LMPK12050079			-	C26H26O6	-	-	-	-	-	-	-	-		-	-	-	M+2Na-H
metab_12306	313.164	4.91028	(2,6,6-Trimethyl-4-oxo-2-cyclohexen-1-yl)methyl beta-D-glucopyranoside	-	-	-	-	C16H26O7	-	-	-	-	-	-	-	-		-	-	-	M+H-H2O
metab_12381	212.118	4.83065	Nitrin	-	-	-	-	C13H13N3	-	-	-	-	-	-	-	-		-	-	-	M+H
metab_12425	177.054	4.78023	3-(4-methoxy-6-oxopyran-2-yl)butanoic acid	-	-	-	-	C10H12O5	-	-	-	-	-	-	-	-		-	-	-	M+H-2H2O
metab_12448	105.034	4.75917	4-hydroxy-3,6-dimethylpyran-2-one	-	-	-	-	C7H8O3	-	-	-	-	-	-	-	-		-	-	-	M+H-2H2O
metab_12517	324.107	4.66697	(E)-4-(6,8-dihydroxy-3-methyl-1-oxoisochromen-7-yl)-2-methoxybut-3-enoic acid	-	-	-	-	C15H14O7	-	-	-	-	-	-	-	-		-	-	-	M+NH4
metab_12546	209.153	4.6254	2-Cyclohexen-1-one, 4-hydroxy-4-(3-hydroxybutyl)-3,5,5-trimethyl-	-	-	-	-	C13H22O3	-	-	-	-	-	-	-	-		-	-	-	M+H-H2O
metab_12562	152.07	4.61082	Dopamine quinone	HMDB0012219	Dopamine quinone	151.063	50673-96-6	C8H9NO2	C17755	Dopamine quinone	-	-	map00965	Betalain biosynthesis	Metabolism	Biosynthesis of other secondary metabolites		Organic oxygen compounds	Organooxygen compounds	Carbonyl compounds	M+H
metab_12587	131.049	4.5882	Cis-Cinnamic acid	HMDB0000567	Cinnamic acid	148.052	102-94-3	C9H8O2	C10438	Cinnamic acid;Benzeneacrylic acid	-	-	-	-	-	-		Phenylpropanoids and polyketides	Cinnamic acids and derivatives	Cinnamic acids	M+H-H2O
metab_12615	147.044	4.55995	Coumarin	HMDB0001218	Coumarin	146.037	91-64-5	C9H6O2	C05851	Coumarin;Coumarine;Cumarin;2H-1-Benzopyran-2-one;1,2-Benzopyrone;2-Propenoic acid, 3-(2-hydroxyphenyl)-, delta-lactone;5,6-Benzo-2-pyrone;Benzo-alpha-pyrone;cis-o-Coumarinic acid lactone;Coumarinic anhydride;o-Hydroxycinnamic acid lactone;Rattex;Tonka bean camphor	-	-	map00940;map01110	Phenylpropanoid biosynthesis; Biosynthesis of secondary metabolites	Metabolism;Metabolism	Biosynthesis of other secondary metabolites;Global and overview maps		Phenylpropanoids and polyketides	Coumarins and derivatives	Not Available	M+H
metab_12634	248.113	4.54365	Valinopine	-	-	-	-	C10H17NO6	C19976	Valinopine	-	-	-	-	-	-		-	-	-	M+H
metab_12657	673.222	4.51332	6-{2-[5-(2,4-dihydroxyphenyl)-6-(5-hydroxy-2,2-dimethyl-2H-chromene-6-carbonyl)-3-methylcyclohex-2-en-1-yl]-3-hydroxyphenoxy}-3,4,5-trihydroxyoxane-2-carboxylic acid	HMDB0126403	6-{2-[5-(2,4-dihydroxyphenyl)-6-(5-hydroxy-2,2-dimethyl-2H-chromene-6-carbonyl)-3-methylcyclohex-2-en-1-yl]-3-hydroxyphenoxy}-3,4,5-trihydroxyoxane-2-carboxylic acid	690.231	-	C37H38O13	-	-	-	-	-	-	-	-		Phenylpropanoids and polyketides	Linear 1,3-diarylpropanoids	Chalcones and dihydrochalcones	M+H-H2O
metab_12663	597.215	4.50227	Cascaroside	HMDB0035756	Cascaroside A	580.179	-	C27H32O13	-	-	-	-	-	-	-	-		Organic oxygen compounds	Organooxygen compounds	Carbohydrates and carbohydrate conjugates	M+CH3OH+H
metab_12685	292.129	4.47723	Gly-Tyr-Ala	-	-	-	-	C14H19N3O5	-	-	-	-	-	-	-	-		-	-	-	M+H-H2O
metab_12686	240.086	4.47723	1H-Pyrrole-3-propanoic acid, 5-acetyl-4-(carboxymethyl)-	-	-	-	-	C11H13NO5	-	-	-	-	-	-	-	-		-	-	-	M+H
metab_12687	199.086	4.47723	Harmanine	HMDB0035197	Harmanine	198.079	2506-09-04	C12H10N2O	-	-	-	-	-	-	-	-		Organic oxygen compounds	Organooxygen compounds	Alcohols and polyols	M+H
metab_12729	108.045	4.43657	3-Pyridinaldehyde	-	-	-	-	C6H5NO	C07327	3-Pyridinaldehyde;Pyridine-3-aldehyde;3-Pyridinecarboxaldehyde;Nicotinaldehyde	-	-	-	-	-	-		-	-	-	M+H
metab_12759	263.127	4.40515	Parthenin	LMPR0103420001			-	C15H18O4	C09523	Parthenin	-	-	-	-	-	-		-	-	-	M+H
metab_12784	171.065	4.37863	DL-3,4-Dihydroxyphenyl glycol	-	-	-	-	C8H10O4	-	-	-	-	-	-	-	-		-	-	-	M+H
metab_12788	310.164	4.3746	(E)-4-[1-(2,6-dimethylphenoxy)propan-2-ylamino]-4-oxobut-2-enoic acid	-	-	-	-	C15H19NO4	-	-	-	-	-	-	-	-		-	-	-	M+CH3OH+H
metab_12842	103.054	4.31917	1-(2-Furyl)butan-3-one	HMDB0032290	1-(2-Furyl)butan-3-one	138.068	699-17-2	C8H10O2	-	-	-	-	-	-	-	-		Organoheterocyclic compounds	Heteroaromatic compounds	Not Available	M+H-2H2O
metab_12890	264.18	4.25293	2-[(2-hydroxy-3-methylbutanoyl)amino]-4-methylpentanoic acid	-	-	-	-	C11H21NO4	-	-	-	-	-	-	-	-		-	-	-	M+CH3OH+H
metab_12939	179.034	4.1951	Caffeoquinone	-	-	-	-	C9H6O4	C16828	Caffeoquinone;Caffeic acid quinone	-	-	-	-	-	-		-	-	-	M+H
metab_12950	347.123	4.17975	Miraxanthin-V	-	-	-	-	C17H18N2O6	C08557	Miraxanthin-V	-	-	map01110;map00965	Biosynthesis of secondary metabolites; Betalain biosynthesis	Metabolism;Metabolism	Global and overview maps;Biosynthesis of other secondary metabolites		-	-	-	M+H
metab_12992	303.133	4.14288	1,3-Dioxolo[4,5-c]pyridin-4(5H)-one, 2-(1-hydroxy-3-methylbutyl)-6-methyl-	-	-	-	-	C12H17NO4	-	-	-	-	-	-	-	-		-	-	-	M+ACN+Na
metab_12993	196.097	4.14288	O-BENZYL-l-SERINE	-	-	-	-	C10H13NO3	-	-	-	-	-	-	-	-		-	-	-	M+H
metab_13016	133.065	4.11437	2-Indanone	-	-	-	-	C9H8O	C07727	2-Indanone;2H-Inden-2-one, 1,3-dihydro-	-	-	-	-	-	-		-	-	-	M+H
metab_13024	312.144	4.10163	Benzyl beta-D-glucopyranoside	-	-	-	-	C13H18O6	-	-	-	-	-	-	-	-		-	-	-	M+ACN+H
metab_13031	231.086	4.09303	1-(3-carboxypropyl)-3,7-dimethylxanthine	-	-	-	-	C11H14N4O4	-	-	-	-	-	-	-	-		-	-	-	M+H-2H2O
metab_13042	293.149	4.0862	(4E,6E)-3-(4-formylanilino)-8-hydroxyocta-4,6-dienoic acid	-	-	-	-	C15H17NO4	-	-	-	-	-	-	-	-		-	-	-	M+NH4
metab_13047	236.048	4.08238	Luteolinidin	HMDB0029249	Luteolinidin	271.061	1154-78-5	C15H11O5+	C08652	Luteolinidin	-	-	-	-	-	-		Phenylpropanoids and polyketides	Flavonoids	Hydroxyflavonoids	M+H-2H2O
metab_13048	213.066	4.08238	Hydroxynalidixic acid	HMDB0060826	Hydroxynalidixic acid	248.08	3759-18-0	C12H12N2O4	-	-	-	-	-	-	-	-		Organoheterocyclic compounds	Diazanaphthalenes	Naphthyridines	M+H-2H2O
metab_13096	135.044	4.02695	6E-Octene-2,4-diynoic acid	LMFA01030743			-	C8H6O2	-	-	-	-	-	-	-	-		-	-	-	M+H
metab_13107	337.091	4.01588	Chlorogenic acid	HMDB0040690;HMDB0003164	5Z-Caffeoylquinic acid;Chlorogenic acid	354.095082174;354.095082174	327-97-9	C16H18O9	C00852	Chlorogenate;Chlorogenic acid;Caffeoyl quinic acid;trans-5-O-Caffeoyl-D-quinate	-	-	map00940;map00941;map01110;map00945	Phenylpropanoid biosynthesis; Flavonoid biosynthesis; Biosynthesis of secondary metabolites; Stilbenoid, diarylheptanoid and gingerol biosynthesis	Metabolism;Metabolism;Metabolism;Metabolism	Biosynthesis of other secondary metabolites;Biosynthesis of other secondary metabolites;Global and overview maps;Biosynthesis of other secondary metabolites		Organic oxygen compounds	Organooxygen compounds	Alcohols and polyols	M+H-H2O
metab_13118	227.091	4.00542	Genipin	HMDB0035830;MJDBOTE0001654	Genipin	226.084	6902-77-8	C11H14O5	C09780	Genipin	-	-	-	-	-	-		Lipids and lipid-like molecules	Prenol lipids	Monoterpenoids	M+H
metab_13119	180.065	4.00542	Adrenochrome	HMDB0012884	Adrenochrome	179.058	7506-92-5	C9H9NO3	-	-	-	-	-	-	-	-		Organoheterocyclic compounds	Indoles and derivatives	Not Available	M+H
metab_13156	533.249	3.95867	Perulactone B	HMDB0030119	Perulactone B	488.277	85643-90-9	C28H40O7	-	-	-	-	-	-	-	-		Lipids and lipid-like molecules	Steroids and steroid derivatives	Bile acids, alcohols and derivatives	M+2Na-H
metab_13164	379.09	3.95048	Kynurenate	HMDB0000715	Kynurenic acid	189.043	-	C10H7NO3	C01717	4-Hydroxy-2-quinolinecarboxylic acid;Kynurenic acid;Kynurenate	-	-	map01100;map00380	Metabolic pathways; Tryptophan metabolism	Metabolism;Metabolism	Global and overview maps;Amino acid metabolism		Organoheterocyclic compounds	Quinolines and derivatives	Quinoline carboxylic acids	2M+H
metab_13194	252.159	3.91628	Pterosin N	HMDB0038218	Pterosin N	234.126	54797-11-4	C14H18O3	-	-	-	-	-	-	-	-		Benzenoids	Indanes	Indanones	M+NH4
metab_13213	165.091	3.88498	Eugenol	HMDB0005809	Eugenol	164.084	97-53-0	C10H12O2	C10453	Eugenol	-	-	map00940	Phenylpropanoid biosynthesis	Metabolism	Biosynthesis of other secondary metabolites		Benzenoids	Phenols	Methoxyphenols	M+H
metab_13218	336.201	3.87462	Tomelukast	-	-	-	-	C16H22N4O3	-	-	-	-	-	-	-	-		-	-	-	M+NH4
metab_13234	232.097	3.84688	7-hydroxy-3,5-dimethylisochromen-1-one	-	-	-	-	C11H10O3	-	-	-	-	-	-	-	-		-	-	-	M+ACN+H
metab_13249	185.06	3.82935	6,7-Dimethoxy-4-methylcoumarin	-	-	-	-	C12H12O4	-	-	-	-	-	-	-	-		-	-	-	M+H-2H2O
metab_13257	183.08	3.82453	Carlina oxide	-	-	-	-	C13H10O	C08399	Carlina oxide	-	-	-	-	-	-		-	-	-	M+H
metab_13266	285.123	3.8136	4-[formyl-(6-methoxyquinolin-8-yl)amino]pentanoic acid	-	-	-	-	C16H18N2O4	-	-	-	-	-	-	-	-		-	-	-	M+H-H2O
metab_13285	323.16	3.7822	Tomaymycin hemiaminal	-	-	-	-	C15H18N2O4	-	-	-	-	-	-	-	-		-	-	-	M+CH3OH+H
metab_13286	243.086	3.7822	4-(beta-D-Glucopyranosyloxy)-2-methylenebutanoic acid	-	-	-	-	C11H18O8	-	-	-	-	-	-	-	-		-	-	-	M+H-2H2O
metab_13292	427.091	3.77392	3,4,5-trihydroxy-6-({4-hydroxy-2-oxo-2H-furo[2,3-h]chromen-8-yl}oxy)oxane-2-carboxylic acid	HMDB0135851	3,4,5-trihydroxy-6-({4-hydroxy-2-oxo-2H-furo[2,3-h]chromen-8-yl}oxy)oxane-2-carboxylic acid	394.054	-	C17H14O11	-	-	-	-	-	-	-	-		Phenylpropanoids and polyketides	Coumarins and derivatives	Furanocoumarins	M+CH3OH+H
metab_13357	261.144	3.6979	Gamma-Glu-Leu	HMDB0011171	gamma-Glutamylleucine	260.137	-	C11H20N2O5	-	-	-	-	-	-	-	-		Organic acids and derivatives	Carboxylic acids and derivatives	Amino acids, peptides, and analogues	M+H
metab_13369	281.113	3.68782	Asp-Phe	HMDB0000706	Aspartylphenylalanine	280.106	-	C13H16N2O5	-	-	-	-	-	-	-	-		Organic acids and derivatives	Carboxylic acids and derivatives	Amino acids, peptides, and analogues	M+H
metab_13376	182.081	3.68068	4-Hydroxy-4-(3-pyridyl)-butanoic acid	HMDB0001119	4-Hydroxy-4-(3-pyridyl)-butanoic acid	181.074	15569-97-8	C9H11NO3	C19579	gamma-Hydroxy-3-pyridinebutanoate	-	-	-	-	-	-		Organoheterocyclic compounds	Pyridines and derivatives	Not Available	M+H
metab_13382	689.225	3.66915	Ichangin 4-glucoside	HMDB0039340	Ichangin 4-glucoside	650.257	-	C32H42O14	-	-	-	-	-	-	-	-		Lipids and lipid-like molecules	Prenol lipids	Terpene glycosides	M+K
metab_13423	237.123	3.62188	ALANYL-dl-PHENYLALANINE	-	-	-	-	C12H16N2O3	-	-	-	-	-	-	-	-		-	-	-	M+H
metab_13425	141.01	3.62188	4-Chlorobenzaldehyde	-	-	-	-	C7H5ClO	C06648	4-Chlorobenzaldehyde	-	-	-	-	-	-		-	-	-	M+H
metab_13437	289.049	3.60718	7'-Hydroxy-[3,4']bichromenyl-2,2'-dione	-	-	-	-	C18H10O5	-	-	-	-	-	-	-	-		-	-	-	M+H-H2O
metab_13456	236.128	3.58645	MJAW00415	;MJAW00415			-	C13H19NO4	-	-	-	-	-	-	-	-		-	-	-	M+H-H2O
metab_13462	201.102	3.57755	1-Methyltryptophan	-	-	-	-	C12H14N2O2	-	-	-	-	-	-	-	-		-	-	-	M+H-H2O
metab_13470	294.133	3.56873	(2R)-7-hydroxy-8-(2-hydroxyethyl)-5-methoxy-2-methyl-2,3-dihydrochromen-4-one	-	-	-	-	C13H16O5	-	-	-	-	-	-	-	-		-	-	-	M+ACN+H
metab_13473	227.091	3.56873	4,8-dihydroxy-3,7,8-trimethyl-5,7-dihydropyrano[4,3-b]pyran-2-one	-	-	-	-	C11H14O5	-	-	-	-	-	-	-	-		-	-	-	M+H
metab_13482	316.176	3.5558	Methyl 2-(1,3,5-trihydroxy-4a-methyl-8-oxodecahydro-2-naphthalenyl)acrylate	-	-	-	-	C15H22O6	-	-	-	-	-	-	-	-		-	-	-	M+NH4
metab_13513	132.044	3.53195	4-Hydroxy-L-Phenylglycine	-	-	-	-	C8H9NO3	-	-	-	-	-	-	-	-		-	-	-	M+H-2H2O
metab_13576	276.123	3.46608	Dehydro-piliformic-acid	-	-	-	-	C11H16O4	-	-	-	-	-	-	-	-		-	-	-	M+ACN+Na
metab_13617	254.102	3.41647	Suberylglycine	HMDB0000953	Suberylglycine	231.111	60317-54-6	C10H17NO5	-	-	-	-	-	-	-	-		Organic acids and derivatives	Carboxylic acids and derivatives	Amino acids, peptides, and analogues	M+Na
metab_13671	166.05	3.35007	N-formylanthranilic acid	HMDB0004089	Formylanthranilic acid	165.043	-	C8H7NO3	C05653	Formylanthranilate;N-Formylanthranilate;2-(Formylamino)-benzoic acid	-	-	map01100;map00380	Metabolic pathways; Tryptophan metabolism	Metabolism;Metabolism	Global and overview maps;Amino acid metabolism		Benzenoids	Benzene and substituted derivatives	Benzoic acids and derivatives	M+H
metab_13706	356.097	3.30755	Beta-D-Glucopyranuronic acid	HMDB0010314	Beta-D-Glucopyranuronic acid	314.064	29315-53-5	C13H14O9	C08350	beta-D-Glucopyranuronic acid;beta-D-Glucuronic acid	-	-	-	-	-	-		Organic oxygen compounds	Organooxygen compounds	Carbohydrates and carbohydrate conjugates	M+ACN+H
metab_13750	444.186	3.2538	2-(beta-D-Glucopyranosyloxy)benzyl 1,6-dihydroxy-2-cyclohexene-1-carboxylate	-	-	-	-	C20H26O10	-	-	-	-	-	-	-	-		-	-	-	M+NH4
metab_13755	180.552	3.24877	Triglochinin	HMDB0030934	Triglochinin	359.085	28876-11-1	C14H17NO10	C08342	Triglochinin;2-Hexenedioic acid,4-(cyano(beta-D-glucopyranosyloxy)methylene)-, (E,Z)-	-	-	-	-	-	-		Organic oxygen compounds	Organooxygen compounds	Carbohydrates and carbohydrate conjugates	M+2H
metab_13763	356.119	3.22527	Glutamyltryptophan	HMDB0028830	Glutamyltryptophan	333.132	38101-59-6	C16H19N3O5	-	-	-	-	-	-	-	-		Organic acids and derivatives	Carboxylic acids and derivatives	Amino acids, peptides, and analogues	M+Na
metab_13776	286.091	3.20802	3-Hydroxy-N-methylpyridinium glucuronide	-	-	-	-	C12H15NO7	-	-	-	-	-	-	-	-		-	-	-	M+H
metab_13796	220.118	3.17025	Pantothenic Acid	HMDB0000210	Pantothenic acid	219.111	79-83-4	C9H17NO5	C00864	Pantothenate;Pantothenic acid;(R)-Pantothenate	Vitamins and Cofactors	Vitamins	map01100;map01110;map00770;map00410	Metabolic pathways; Biosynthesis of secondary metabolites; Pantothenate and CoA biosynthesis; beta-Alanine metabolism	Metabolism;Metabolism;Metabolism;Metabolism	Global and overview maps;Global and overview maps;Metabolism of cofactors and vitamins;Metabolism of other amino acids		Organic oxygen compounds	Organooxygen compounds	Alcohols and polyols	M+H
metab_13802	211.096	3.1586	6-[(1S,2R)-1,2-dihydroxypentyl]-4-methoxypyran-2-one	-	-	-	-	C11H16O5	-	-	-	-	-	-	-	-		-	-	-	M+H-H2O
metab_13807	261.123	3.1548	6-benzyl-4-oxo-1H-pyridine-3-carboxamide	-	-	-	-	C13H12N2O2	-	-	-	-	-	-	-	-		-	-	-	M+CH3OH+H
metab_13815	401.038	3.14202	2,4-Dihydroxy-2H-1,4-benzoxazin-3(4H)-one	HMDB0033733	2,4-Dihydroxy-2H-1,4-benzoxazin-3(4H)-one	181.038	17359-54-5	C8H7NO4	C15770	DIBOA;2,4-Dihydroxy-1,4-benzoxazin-3-one;2,4-Dihydroxy-2H-1,4-benzoxazin-3(4H)-one	-	-	map00402;map01110	Benzoxazinoid biosynthesis; Biosynthesis of secondary metabolites	Metabolism;Metabolism	Biosynthesis of other secondary metabolites;Global and overview maps		Organoheterocyclic compounds	Benzoxazines	Benzoxazinones	2M+K
metab_13834	326.159	3.1198	3-(2,4-dihydroxypentyl)-6,8-dimethoxyisochromen-1-one	-	-	-	-	C16H20O6	-	-	-	-	-	-	-	-		-	-	-	M+NH4
metab_13854	142.086	3.0959	Arecaidine	HMDB0030352	Arecaidine	141.079	499-04-7	C7H11NO2	C10128	Arecaidine	-	-	-	-	-	-		Alkaloids and derivatives	Not Available	Not Available	M+H
metab_13932	174.091	3.00398	6-ethyl-5-hydroxy-3-oxa-1-azatricyclo[5.3.1.04,11]undec-7-en-2-one	-	-	-	-	C11H15NO3	-	-	-	-	-	-	-	-		-	-	-	M+H-2H2O
metab_13940	169.097	2.99178	Pyridoxamine	HMDB0001431;HMDB0062696	Pyridoxamine;Pyridoxaminium(1+)	168.089877638;169.097154087	85-87-0	C8H12N2O2	C00534	Pyridoxamine;PM	Vitamins and Cofactors	Vitamins	map01100;map00750	Metabolic pathways; Vitamin B6 metabolism	Metabolism;Metabolism	Global and overview maps;Metabolism of cofactors and vitamins		Organoheterocyclic compounds	Pyridines and derivatives	Pyridoxamines	M+H
metab_13944	132.081	2.98748	3-Methylindole	HMDB0000466	3-Methylindole	131.073	83-34-1	C9H9N	C08313	Skatole;3-Methylindole	-	-	map00380	Tryptophan metabolism	Metabolism	Amino acid metabolism		Organoheterocyclic compounds	Indoles and derivatives	Indoles	M+H
metab_13951	344.133	2.97555	2-(3-hydroxy-5-methoxyphenoxy)-6-(hydroxymethyl)oxane-3,4,5-triol	-	-	-	-	C13H18O8	-	-	-	-	-	-	-	-		-	-	-	M+ACN+H
metab_13965	223.107	2.96618	MJAW00022	;MJAW00022			-	C11H11NO3	-	-	-	-	-	-	-	-		-	-	-	M+NH4
metab_13968	127.05	2.96618	Thymine	HMDB0000262	Thymine	126.043	65-71-4	C5H6N2O2	C00178	Thymine;5-Methyluracil	Nucleic acids	Bases	map00240;map01100	Pyrimidine metabolism; Metabolic pathways	Metabolism;Metabolism	Nucleotide metabolism;Global and overview maps		Organoheterocyclic compounds	Diazines	Pyrimidines and pyrimidine derivatives	M+H
metab_13970	107.049	2.96618	Benzaldehyde	HMDB0006115	Benzaldehyde	106.042	100-52-7	C7H6O	C00261	Benzaldehyde;Benzoic aldehyde	-	-	map01100	Metabolic pathways	Metabolism	Global and overview maps		Benzenoids	Benzene and substituted derivatives	Benzoyl derivatives	M+H
metab_14035	189.102	2.89528	Atenolol-desisopropyl	-	-	-	-	C11H16N2O3	-	-	-	-	-	-	-	-		-	-	-	M+H-2H2O
metab_14036	179.07	2.89528	4-(2-methyl-6-oxopyran-3-yl)butanoic acid	-	-	-	-	C10H12O4	-	-	-	-	-	-	-	-		-	-	-	M+H-H2O
metab_14050	383.144	2.87508	16-iodo-hexadecanoic acid	LMFA01090039			-	C16H31IO2	-	-	-	-	-	-	-	-		-	-	-	M+H
metab_14073	233.092	2.85035	Nalidixic acid	HMDB0014917;MJDBOTE0001474	Nalidixic Acid	232.085	389-08-2	C12H12N2O3	C05079	Nalidixic acid	Antibiotics	Quinolones	-	-	-	-		Organoheterocyclic compounds	Diazanaphthalenes	Naphthyridines	M+H
metab_14101	308.112	2.82708	Fuzhuanin B	-	-	-	-	C13H14O6	-	-	-	-	-	-	-	-		-	-	-	M+ACN+H
metab_14108	445.193	2.81802	6-O-Isobutyryl-alpha-D-glucopyranosyl alpha-D-glucopyranoside	-	-	-	-	C16H28O12	-	-	-	-	-	-	-	-		-	-	-	M+CH3OH+H
metab_14121	176.07	2.80757	7-Amino-4-methylcoumarin	-	-	-	-	C10H9NO2	C01386	NH2Mec;7-Amino-4-methylcoumarin	-	-	-	-	-	-		-	-	-	M+H
metab_14157	258.097	2.7664	N-Acetylmuramate	HMDB0060493	N-Acetylmuramate	293.111	-	C11H19NO8	C02713	N-Acetylmuramate;N-Acetylmuramic acid;N-Acetyl-D-muramoate	Carbohydrates	Monosaccharides	map01100;map00520	Metabolic pathways; Amino sugar and nucleotide sugar metabolism	Metabolism;Metabolism	Global and overview maps;Carbohydrate metabolism		Organic oxygen compounds	Organooxygen compounds	Carbohydrates and carbohydrate conjugates	M+H-2H2O
metab_14158	168.065	2.7664	3-Hydroxyphenylglycine	-	-	-	-	C8H9NO3	-	-	-	-	-	-	-	-		-	-	-	M+H
metab_14162	144.048	2.76308	4-Methyl-5-thiazoleethanol	HMDB0032985	5-(2-Hydroxyethyl)-4-methylthiazole	143.04	137-00-8	C6H9NOS	C04294	5-(2-Hydroxyethyl)-4-methylthiazole;4-Methyl-5-(2'-hydroxyethyl)-thiazole;4-Methyl-5-(2-hydroxyethyl)thiazole;HET	-	-	map00730;map01100	Thiamine metabolism; Metabolic pathways	Metabolism;Metabolism	Metabolism of cofactors and vitamins;Global and overview maps		Organoheterocyclic compounds	Azoles	Thiazoles	M+H
metab_14188	288.107	2.74133	Volkenin	-	-	-	-	C12H17NO7	C08344	Volkenin	-	-	-	-	-	-		-	-	-	M+H
metab_14189	346.124	2.74133	Heptonic acid, 4,7-anhydro-2-deoxy-7-C-phenyl-, methyl ester	-	-	-	-	C14H18O6	-	-	-	-	-	-	-	-		-	-	-	M+ACN+Na
metab_14213	267.097	2.71978	Palythine	-	-	-	-	C10H16N2O5	-	-	-	-	-	-	-	-		-	-	-	M+Na
metab_14259	137.046	2.68737	Hypoxanthine	HMDB0000157	Hypoxanthine	136.039	68-94-0	C5H4N4O	C00262	Hypoxanthine;Purine-6-ol	-	-	map01100;map00230	Metabolic pathways; Purine metabolism	Metabolism;Metabolism	Global and overview maps;Nucleotide metabolism		Organoheterocyclic compounds	Imidazopyrimidines	Purines and purine derivatives	M+H
metab_14267	210.076	2.6797	2-methylidene-3-oxo-4a,7,8,8a-tetrahydro-4H-1,4-benzoxazine-7-carboxylic acid	-	-	-	-	C10H11NO4	-	-	-	-	-	-	-	-		-	-	-	M+H
metab_14269	135.03	2.6797	Oxypurinol	HMDB0000786	Oxypurinol	152.033	2465-59-0	C5H4N4O2	C07599	Alloxanthine;Oxipurinol;Oxypurinol	-	-	-	-	-	-		Organoheterocyclic compounds	Imidazopyrimidines	Purines and purine derivatives	M+H-H2O
metab_14278	290.086	2.67112	2'-deoxyguanosine	HMDB0000085	Deoxyguanosine	267.097	-	C10H13N5O4	C00330	Deoxyguanosine;2'-Deoxyguanosine	Nucleic acids	Nucleosides	map01100;map02010;map00230	Metabolic pathways; ABC transporters; Purine metabolism	Metabolism;Environmental Information Processing;Metabolism	Global and overview maps;Membrane transport;Nucleotide metabolism		Nucleosides, nucleotides, and analogues	Purine nucleosides	Purine 2'-deoxyribonucleosides	M+Na
metab_14292	346.124	2.66125	N-Acetyl-Asp-Glu	-	-	-	-	C11H16N2O8	-	-	-	-	-	-	-	-		-	-	-	M+ACN+H
metab_14307	153.031	2.65395	Thymidine-3',5'-cyclic monophosphate	-	-	-	-	C10H13N2O7P	-	-	-	-	-	-	-	-		-	-	-	M+2H
metab_14314	446.151	2.64137	Quizalofop-p-tefuryl	-	-	-	-	C22H21ClN2O5	C18764	Quizalofop-P-tefuryl	-	-	-	-	-	-		-	-	-	M+NH4
metab_14324	288.064	2.62353	2-Hydroxyanthraquinone	-	-	-	-	C14H8O3	-	-	-	-	-	-	-	-		-	-	-	M+ACN+Na
metab_14347	363.059	2.60543	3,4,5-trihydroxy-6-(2,3,4,5-tetrahydroxybenzoyloxy)oxane-2-carboxylic acid	HMDB0126653	3,4,5-trihydroxy-6-(2,3,4,5-tetrahydroxybenzoyloxy)oxane-2-carboxylic acid	362.049	-	C13H14O12	-	-	-	-	-	-	-	-		Organic oxygen compounds	Organooxygen compounds	Carbohydrates and carbohydrate conjugates	M+H
metab_14363	204.065	2.59842	3-(3-Indolyl)-2-oxopropanoic acid	HMDB0060484	Indolepyruvate	203.058	-	C11H9NO3	C00331	Indolepyruvate;Indolepyruvic acid;(Indol-3-yl)pyruvate;Indole-3-pyruvate;3-(Indol-3-yl)pyruvate	-	-	map01100;map00380	Metabolic pathways; Tryptophan metabolism	Metabolism;Metabolism	Global and overview maps;Amino acid metabolism		Organoheterocyclic compounds	Indoles and derivatives	Indolyl carboxylic acids and derivatives	M+H
metab_14415	390.139	2.54037	Histidine-betaxanthin	-	-	-	-	C15H16N4O6	-	-	-	-	-	-	-	-		-	-	-	M+ACN+H
metab_14431	451.125	2.52292	6-({8-[2-(3,4-dihydroxyphenyl)-3,5,7-trihydroxy-6-[3,4,5-trihydroxy-6-(hydroxymethyl)oxan-2-yl]-3,4-dihydro-2H-1-benzopyran-4-yl]-3,5-dihydroxy-2-(3-hydroxyphenyl)-3,4-dihydro-2H-1-benzopyran-7-yl}oxy)-3,4,5-trihydroxyoxane-2-carboxylic acid	HMDB0126780	6-({8-[2-(3,4-dihydroxyphenyl)-3,5,7-trihydroxy-6-[3,4,5-trihydroxy-6-(hydroxymethyl)oxan-2-yl]-3,4-dihydro-2H-1-benzopyran-4-yl]-3,5-dihydroxy-2-(3-hydroxyphenyl)-3,4-dihydro-2H-1-benzopyran-7-yl}oxy)-3,4,5-trihydroxyoxane-2-carboxylic acid	900.232	-	C42H44O22	-	-	-	-	-	-	-	-		Phenylpropanoids and polyketides	Flavonoids	Biflavonoids and polyflavonoids	M+2H
metab_14436	833.252	2.51762	Peonidin 3-(6''-p-coumaroyl-glucoside) 5-glucoside	HMDB0038092	Peonidin 3-(6''-p-coumaroyl-glucoside) 5-glucoside	769.234	51939-65-2	C38H41O17+	-	-	-	-	-	-	-	-		Phenylpropanoids and polyketides	Flavonoids	Flavonoid glycosides	M+ACN+Na
metab_14460	314.091	2.50508	(S)-5'-Deoxy-5'-(methylsulfinyl)adenosine	HMDB0033662	(S)-5'-Deoxy-5'-(methylsulfinyl)adenosine	313.084	897-42-7	C11H15N5O4S	-	-	-	-	-	-	-	-		Nucleosides, nucleotides, and analogues	5'-deoxyribonucleosides	Not Available	M+H
metab_14481	379.17	2.46945	N2-Isobutyryl-2'-deoxyguanosine	-	-	-	-	C14H19N5O5	-	-	-	-	-	-	-	-		-	-	-	M+ACN+H
metab_14493	294.154	2.44075	Butanenitrile, 2-(beta-D-glucopyranosyloxy)-2-methyl-	-	-	-	-	C11H19NO6	-	-	-	-	-	-	-	-		-	-	-	M+CH3OH+H
metab_14494	199.06	2.44075	3-(3,4-Dihydroxyphenyl)lactate	HMDB0003503	3-(3,4-Dihydroxyphenyl)lactic acid	198.053	-	C9H10O5	C01207	3-(3,4-Dihydroxyphenyl)lactate;3,4-Dihydroxyphenyllactic acid	-	-	-	-	-	-		Phenylpropanoids and polyketides	Phenylpropanoic acids	Not Available	M+H
metab_14506	248.149	2.42012	2-(1,2-dihydroxypentyl)-4-methoxy-2,3-dihydropyran-6-one	-	-	-	-	C11H18O5	-	-	-	-	-	-	-	-		-	-	-	M+NH4
metab_14510	190.107	2.41412	(2S)-2-{[1-(R)-Carboxyethyl]amino}pentanoate	-	-	-	-	C8H15NO4	C06326	(2S)-2-{[1-(R)-Carboxyethyl]amino}pentanoate	-	-	-	-	-	-		-	-	-	M+H
metab_14531	121.028	2.38292	2,3-Methyleneglutaric acid	HMDB0059731	2,3-Methyleneglutaric acid	156.042	-	C7H8O4	-	-	-	-	-	-	-	-		Lipids and lipid-like molecules	Fatty Acyls	Fatty acids and conjugates	M+H-2H2O
metab_14532	596.17	2.37862	Norrubrofusarin 6-beta-gentiobioside	HMDB0034570	Norrubrofusarin 6-beta-gentiobioside	582.158	-	C26H30O15	-	-	-	-	-	-	-	-		Organoheterocyclic compounds	Naphthopyrans	Naphthopyranones	2M+3H2O+2H
metab_14551	758.223	2.29202	3,4,5-trihydroxy-6-{3-[(E)-2-(2-hydroxy-4-{[3,4,5-trihydroxy-6-(hydroxymethyl)oxan-2-yl]oxy}phenyl)ethenyl]-5-{[3,4,5-trihydroxy-6-(hydroxymethyl)oxan-2-yl]oxy}phenoxy}oxane-2-carboxylic acid	HMDB0134114	3,4,5-trihydroxy-6-{3-[(E)-2-(2-hydroxy-4-{[3,4,5-trihydroxy-6-(hydroxymethyl)oxan-2-yl]oxy}phenyl)ethenyl]-5-{[3,4,5-trihydroxy-6-(hydroxymethyl)oxan-2-yl]oxy}phenoxy}oxane-2-carboxylic acid	744.211	-	C32H40O20	-	-	-	-	-	-	-	-		Phenylpropanoids and polyketides	Stilbenes	Stilbene glycosides	2M+3H2O+2H
metab_14556	286.128	2.27737	4-hydroxy-5-(1,2,3-trihydroxy-3-phenylpropyl)oxolan-2-one	-	-	-	-	C13H16O6	-	-	-	-	-	-	-	-		-	-	-	M+NH4
metab_14568	172.108	2.21287	L-Homocitrulline	HMDB0000679;MJDBOTE0000607	Homocitrulline	189.111	-	C7H15N3O3	C02427	L-Homocitrulline	-	-	-	-	-	-		Organic acids and derivatives	Carboxylic acids and derivatives	Amino acids, peptides, and analogues	M+H-H2O
metab_14620	336.128	2.02033	Mmv676604	-	-	-	-	C18H21N5O2S	-	-	-	-	-	-	-	-		-	-	-	M+H-2H2O
metab_14623	290.123	2.0056	N-Allyladenosine	-	-	-	-	C13H17N5O4	-	-	-	-	-	-	-	-		-	-	-	M+H-H2O
metab_14638	132.102	1.93417	L-Isoleucine	HMDB0000172;HMDB0000557	L-Isoleucine;L-Alloisoleucine	131.094628665;131.094628665	73-32-5	C6H13NO2	C00407	L-Isoleucine;2-Amino-3-methylvaleric acid	Peptides	Amino acids	map01100;map01110;map00280;map00290;map01210;map00960;map02010;map01230;map00966;map00460;map00970	Metabolic pathways; Biosynthesis of secondary metabolites; Valine, leucine and isoleucine degradation; Valine, leucine and isoleucine biosynthesis; 2-Oxocarboxylic acid metabolism; Tropane, piperidine and pyridine alkaloid biosynthesis; ABC transporters; Biosynthesis of amino acids; Glucosinolate biosynthesis; Cyanoamino acid metabolism; Aminoacyl-tRNA biosynthesis	Metabolism;Metabolism;Metabolism;Metabolism;Metabolism;Metabolism;Environmental Information Processing;Metabolism;Metabolism;Metabolism;Genetic Information Processing	Global and overview maps;Global and overview maps;Amino acid metabolism;Amino acid metabolism;Global and overview maps;Biosynthesis of other secondary metabolites;Membrane transport;Global and overview maps;Biosynthesis of other secondary metabolites;Metabolism of other amino acids;Translation		Organic acids and derivatives	Carboxylic acids and derivatives	Amino acids, peptides, and analogues	M+H
metab_14646	580.223	1.91167	8-[1-(2,4-dihydroxyphenyl)-2-hydroxy-3-(3-hydroxyphenyl)propyl]-2-(4-hydroxy-3-methoxyphenyl)-3,4-dihydro-2H-1-benzopyran-3,5,7-triol	HMDB0135118	8-[1-(2,4-dihydroxyphenyl)-2-hydroxy-3-(3-hydroxyphenyl)propyl]-2-(4-hydroxy-3-methoxyphenyl)-3,4-dihydro-2H-1-benzopyran-3,5,7-triol	562.184	-	C31H30O10	-	-	-	-	-	-	-	-		Phenylpropanoids and polyketides	Flavonoids	Flavans	M+NH4
metab_14707	86.0968	1.75317	Piperidine	HMDB0034301	Piperidine	85.0891	110-89-4	C5H11N	C01746	Piperidine;Azacyclohexane;Hexahydropyridine	-	-	map00960	Tropane, piperidine and pyridine alkaloid biosynthesis	Metabolism	Biosynthesis of other secondary metabolites		Organoheterocyclic compounds	Piperidines	Not Available	M+H
metab_14721	401.05	1.68922	3,4,5-trihydroxy-6-({7-oxo-7H-furo[3,2-g]chromen-4-yl}oxy)oxane-2-carboxylic acid	HMDB0129424	3,4,5-trihydroxy-6-({7-oxo-7H-furo[3,2-g]chromen-4-yl}oxy)oxane-2-carboxylic acid	378.059	-	C17H14O10	-	-	-	-	-	-	-	-		Organic oxygen compounds	Organooxygen compounds	Carbohydrates and carbohydrate conjugates	M+Na
metab_14725	101.024	1.68487	Succinic anhydride	HMDB0032523	Succinic anhydride	100.016	108-30-5	C4H4O3	C19524	Succinic anhydride;Dihydro-2,5-furandione	-	-	-	-	-	-		Organic acids and derivatives	Carboxylic acids and derivatives	Dicarboxylic acids and derivatives	M+H
metab_14750	221.092	1.6345	5-Hydroxy-L-tryptophan	HMDB0000472	5-Hydroxy-L-tryptophan	220.085	4350-09-08	C11H12N2O3	C00643	5-Hydroxy-L-tryptophan;Oxitriptan	-	-	map01100;map00380	Metabolic pathways; Tryptophan metabolism	Metabolism;Metabolism	Global and overview maps;Amino acid metabolism		Organoheterocyclic compounds	Indoles and derivatives	Tryptamines and derivatives	M+H
metab_14755	153.041	1.61892	Xanthine	HMDB0000292	Xanthine	152.033	69-89-6	C5H4N4O2	C00385	Xanthine	-	-	map01100;map01110;map00230;map00232	Metabolic pathways; Biosynthesis of secondary metabolites; Purine metabolism; Caffeine metabolism	Metabolism;Metabolism;Metabolism;Metabolism	Global and overview maps;Global and overview maps;Nucleotide metabolism;Biosynthesis of other secondary metabolites		Organoheterocyclic compounds	Imidazopyrimidines	Purines and purine derivatives	M+H
metab_14772	407.115	1.57442	Mmv007471	-	-	-	-	C23H21ClN2O4	-	-	-	-	-	-	-	-		-	-	-	M+H-H2O
metab_14823	202.107	1.44467	Pantothenate	HMDB0000210	Pantothenic acid	219.111	-	C9H17NO5	C00864	Pantothenate;Pantothenic acid;(R)-Pantothenate	Vitamins and Cofactors	Vitamins	map01100;map01110;map00770;map00410	Metabolic pathways; Biosynthesis of secondary metabolites; Pantothenate and CoA biosynthesis; beta-Alanine metabolism	Metabolism;Metabolism;Metabolism;Metabolism	Global and overview maps;Global and overview maps;Metabolism of cofactors and vitamins;Metabolism of other amino acids		Organic oxygen compounds	Organooxygen compounds	Alcohols and polyols	M+H-H2O
metab_14843	387.039	1.3979	{2-hydroxy-5-[(1E)-3-oxo-3-[(3,4,5,6-tetrahydroxyoxan-2-yl)methoxy]prop-1-en-1-yl]phenyl}oxidanesulfonic acid	HMDB0125186	{2-hydroxy-5-[(1E)-3-oxo-3-[(3,4,5,6-tetrahydroxyoxan-2-yl)methoxy]prop-1-en-1-yl]phenyl}oxidanesulfonic acid	422.052	-	C15H18O12S	-	-	-	-	-	-	-	-		Phenylpropanoids and polyketides	Cinnamic acids and derivatives	Hydroxycinnamic acids and derivatives	M+H-2H2O
metab_14885	315.049	1.35967	Laccaic acid D	HMDB0029508	Laccaic acid D	314.043	18499-84-8	C16H10O7	-	-	-	-	-	-	-	-		Benzenoids	Anthracenes	Anthracenecarboxylic acids and derivatives	M+H
metab_14900	84.0448	1.35213	1-Aminocyclopropane-1-carboxylic acid	HMDB0036458	1-Aminocyclopropanecarboxylic acid	101.048	22059-21-8	C4H7NO2	C01234	1-Aminocyclopropane-1-carboxylate;1-Aminocyclopropane-1-carboxylic acid	-	-	map01100;map00270;map01110	Metabolic pathways; Cysteine and methionine metabolism; Biosynthesis of secondary metabolites	Metabolism;Metabolism;Metabolism	Global and overview maps;Amino acid metabolism;Global and overview maps		Organic acids and derivatives	Carboxylic acids and derivatives	Amino acids, peptides, and analogues	M+H-H2O
metab_14901	605.18	1.34708	Pectolinarin	-	-	-	-	C29H34O15	-	-	-	-	-	-	-	-		-	-	-	M+H-H2O
metab_14926	128.071	1.31817	(S)-2,3,4,5-Tetrahydropiperidine-2-carboxylate	HMDB0012130	鈥?,3,4,5-Tetrahydro-2-pyridinecarboxylic acid	127.063	-	C6H9NO2	C00450	(S)-2,3,4,5-Tetrahydropyridine-2-carboxylate;Delta1-Piperideine-6-L-carboxylate	-	-	map01100;map00960;map00310;map01110	Metabolic pathways; Tropane, piperidine and pyridine alkaloid biosynthesis; Lysine degradation; Biosynthesis of secondary metabolites	Metabolism;Metabolism;Metabolism;Metabolism	Global and overview maps;Biosynthesis of other secondary metabolites;Amino acid metabolism;Global and overview maps		Organic acids and derivatives	Carboxylic acids and derivatives	Amino acids, peptides, and analogues	M+H
metab_14936	343.161	1.30712	(E)-11-(5-carbamoyl-4-oxo-1H-pyridin-2-yl)undec-10-enoic acid	-	-	-	-	C17H24N2O4	-	-	-	-	-	-	-	-		-	-	-	M+Na
metab_14980	198.076	1.26698	DL-Dopa	HMDB0000609	DL-Dopa	197.069	63-84-3	C9H11NO4	C00355	3,4-Dihydroxy-L-phenylalanine;L-Dopa;3-Hydroxy-L-tyrosine;L-beta-(3,4-Dihydroxyphenyl)alanine;Levodopa;Dihydroxy-L-phenylalanine	Peptides;Hormones and transmitters	Amino acids;Neurotransmitters	map01100;map00950;map01110;map00965;map00350	Metabolic pathways; Isoquinoline alkaloid biosynthesis; Biosynthesis of secondary metabolites; Betalain biosynthesis; Tyrosine metabolism	Metabolism;Metabolism;Metabolism;Metabolism;Metabolism	Global and overview maps;Biosynthesis of other secondary metabolites;Global and overview maps;Biosynthesis of other secondary metabolites;Amino acid metabolism		Organic acids and derivatives	Carboxylic acids and derivatives	Amino acids, peptides, and analogues	M+H
metab_14996	152.07	1.25795	2-Amino-3-methylbenzoate	HMDB0060680	2-Amino-3-methylbenzoate	151.063	-	C8H9NO2	C16571	2-Amino-3-methylbenzoate	-	-	-	-	-	-		Benzenoids	Benzene and substituted derivatives	Benzoic acids and derivatives	M+H
metab_15010	154.05	1.24493	1-Carbapen-2-em-3-carboxylic acid	-	-	-	-	C7H7NO3	C06669	(5R)-Carbapen-2-em-3-carboxylate;1-Carbapen-2-em-3-carboxylic acid;(5R)-Carbapenem-3-carboxylic acid;(5R)-Carbapenem-3-carboxylate;(5R)-7-Oxo-1-azabicyclo[3.2.0]hept-2-ene-2-carboxylate	-	-	map01100;map01110;map00332	Metabolic pathways; Biosynthesis of secondary metabolites; Carbapenem biosynthesis	Metabolism;Metabolism;Metabolism	Global and overview maps;Global and overview maps;Biosynthesis of other secondary metabolites		-	-	-	M+H
metab_15020	328.15	1.23145	Gamma-Glutamyltyrosine	HMDB0011741	gamma-Glutamyltyrosine	310.116	7432-23-7	C14H18N2O6	-	-	-	-	-	-	-	-		Organic acids and derivatives	Carboxylic acids and derivatives	Amino acids, peptides, and analogues	M+NH4
metab_15022	231.097	1.23145	Aspartyl-Proline	HMDB0002335;HMDB0028761	Aspartyl-L-proline;Aspartyl-Proline	230.090271568;230.090271568	-	C9H14N2O5	-	-	-	-	-	-	-	-		Organic acids and derivatives	Carboxylic acids and derivatives	Amino acids, peptides, and analogues	M+H
metab_15057	135.044	1.20947	R-(-)-Mandelic acid	-	-	-	-	C8H8O3	-	-	-	-	-	-	-	-		-	-	-	M+H-H2O
metab_15058	509.147	1.20252	Estriol 3-sulfate 16-glucuronide	HMDB0010356;LMST05010047	Estriol 3-sulfate 16-glucuronide	544.161	4661-65-8	C24H32O12S	-	-	-	-	-	-	-	-		Lipids and lipid-like molecules	Steroids and steroid derivatives	Steroidal glycosides	M+H-2H2O
metab_15060	298.114	1.20252	Psicofuranine	-	-	-	-	C11H15N5O5	C05342	Psicofuranine;Angustmycin C	-	-	-	-	-	-		-	-	-	M+H
metab_15066	421.192	1.199	Levocetirizine	HMDB0240226	Levocetirizine	388.155	130018-77-8	C21H25ClN2O3	-	-	-	-	-	-	-	-		Benzenoids	Benzene and substituted derivatives	Diphenylmethanes	M+CH3OH+H
metab_15110	113.035	1.15295	Uracil	HMDB0000300	Uracil	112.027	66-22-8	C4H4N2O2	C00106	Uracil	Nucleic acids	Bases	map00240;map01100;map00770;map00410	Pyrimidine metabolism; Metabolic pathways; Pantothenate and CoA biosynthesis; beta-Alanine metabolism	Metabolism;Metabolism;Metabolism;Metabolism	Nucleotide metabolism;Global and overview maps;Metabolism of cofactors and vitamins;Metabolism of other amino acids		Organoheterocyclic compounds	Diazines	Pyrimidines and pyrimidine derivatives	M+H
metab_15122	338.144	1.1356	4-O-alpha-D-Galactopyranosylcalystegine B2	HMDB0038228;HMDB0038226	4-O-alpha-D-Galactopyranosylcalystegine B2;Romucosine H	337.137281339;385.152537473	-	C13H23NO9	-	-	-	-	-	-	-	-		Organic oxygen compounds	Organooxygen compounds	Carbohydrates and carbohydrate conjugates	M+H
metab_15146	219.097	1.1221	5-L-Glutamyl-L-alanine	HMDB0006248	gamma-Glutamylalanine	218.09	-	C8H14N2O5	C03740	(5-L-Glutamyl)-L-amino acid;L-gamma-Glutamyl-L-amino acid;alpha-(gamma-L-Glutamyl)-L-amino acid	-	-	map01100;map00480	Metabolic pathways; Glutathione metabolism	Metabolism;Metabolism	Global and overview maps;Metabolism of other amino acids		Organic acids and derivatives	Carboxylic acids and derivatives	Amino acids, peptides, and analogues	M+H
metab_15160	463.203	1.11508	Smenathiazole	-	-	-	-	C24H33ClN3O2S+	-	-	-	-	-	-	-	-		-	-	-	M+H
metab_15302	176.092	0.935	2-Aminoheptanedioic acid	HMDB0034252	2-Aminoheptanedioic acid	175.084	3721-85-5	C7H13NO4	-	-	-	-	-	-	-	-		Organic acids and derivatives	Carboxylic acids and derivatives	Amino acids, peptides, and analogues	M+H
metab_15366	189.087	0.8459	Nalpha-Acetyl-L-glutamine	-	-	-	-	C7H12N2O4	-	-	-	-	-	-	-	-		-	-	-	M+H
metab_15400	72.0813	0.824883	Pyrrolidine	HMDB0031641	Pyrrolidine	71.0735	123-75-1	C4H9N	-	-	-	-	-	-	-	-		Organoheterocyclic compounds	Pyrrolidines	Not Available	M+H
metab_15418	332.133	0.81085	5'-O-beta-D-Glucosylpyridoxine	-	-	-	-	C14H21NO8	C03996	5'-O-beta-D-Glucosylpyridoxine	-	-	-	-	-	-		-	-	-	M+H
metab_15440	158.081	0.796883	N-ACETYLPROLINE	HMDB0094701	N-Acetylproline	157.074	68-95-1	C7H11NO3	-	-	-	-	-	-	-	-		Organic acids and derivatives	Carboxylic acids and derivatives	Amino acids, peptides, and analogues	M+H
metab_15449	290.134	0.7829	5-Methylcytidine	HMDB0000982	5-Methylcytidine	257.101	2140-61-6	C10H15N3O5	-	-	-	-	-	-	-	-		Nucleosides, nucleotides, and analogues	Pyrimidine nucleosides	Not Available	M+CH3OH+H
metab_15454	146.092	0.7829	4-Guanidinobutanoic acid	HMDB0003464;HMDB0031842	4-Guanidinobutanoic acid;Rhapontigenin	145.085126611;258.089208936	463-00-3	C5H11N3O2	C01035	4-Guanidinobutanoate;4-Guanidinobutyric acid	-	-	map01100;map00330	Metabolic pathways; Arginine and proline metabolism	Metabolism;Metabolism	Global and overview maps;Amino acid metabolism		Organic acids and derivatives	Carboxylic acids and derivatives	Amino acids, peptides, and analogues	M+H
metab_15468	280.102	0.76905	1-Methylguanosine	HMDB0001563	1-Methylguanosine	297.107	2140-65-0	C11H15N5O5	C04545	tRNA containing 2'-O-methylguanosine	-	-	-	-	-	-		Nucleosides, nucleotides, and analogues	Purine nucleosides	Not Available	M+H-H2O
metab_15469	267.144	0.76905	Neuromedin B (1-3)	HMDB0013016	Neuromedin B (1-3)	302.159	-	C12H22N4O5	-	-	-	-	-	-	-	-		Organic acids and derivatives	Carboxylic acids and derivatives	Amino acids, peptides, and analogues	M+H-2H2O
metab_15472	136.062	0.76905	Adenine	HMDB0000034	Adenine	135.054	73-24-5	C5H5N5	C00147	Adenine;6-Aminopurine	Nucleic acids	Bases	map01100;map00230;map00908	Metabolic pathways; Purine metabolism; Zeatin biosynthesis	Metabolism;Metabolism;Metabolism	Global and overview maps;Nucleotide metabolism;Metabolism of terpenoids and polyketides		Organoheterocyclic compounds	Imidazopyrimidines	Purines and purine derivatives	M+H
metab_15473	140.07	0.76905	Tiglylglycine	HMDB0000959	Tiglylglycine	157.074	35842-45-6	C7H11NO3	-	-	-	-	-	-	-	-		Organic acids and derivatives	Carboxylic acids and derivatives	Amino acids, peptides, and analogues	M+H-H2O
metab_15481	472.166	0.755267	Melatonin glucuronide	HMDB0060830	Melatonin glucuronide	408.153	-	C19H24N2O8	-	-	-	-	-	-	-	-		Nucleosides, nucleotides, and analogues	Nucleoside and nucleotide analogues	1-pyranosylindoles	M+ACN+Na
metab_15495	168.065	0.748367	4-Hydroxy-6-methyl-2-pyrone	-	-	-	-	C6H6O3	C02752	Triacetate lactone;4-Hydroxy-6-methyl-2-pyrone	-	-	-	-	-	-		-	-	-	M+ACN+H
metab_15514	328.105	0.734383	Blepharin	HMDB0029344	Blepharin	327.095	27625-86-1	C14H17NO8	-	-	-	-	-	-	-	-		Organic oxygen compounds	Organooxygen compounds	Carbohydrates and carbohydrate conjugates	M+H
metab_15522	147.113	0.7274	L-Lysine	HMDB0000182	L-Lysine	146.106	56-87-1	C6H14N2O2	C00047	L-Lysine;Lysine acid;2,6-Diaminohexanoic acid	Peptides	Amino acids	map01100;map00310;map01110;map00300;map01210;map00780;map02010;map01230;map00970;map00960	Metabolic pathways; Lysine degradation; Biosynthesis of secondary metabolites; Lysine biosynthesis; 2-Oxocarboxylic acid metabolism; Biotin metabolism; ABC transporters; Biosynthesis of amino acids; Aminoacyl-tRNA biosynthesis; Tropane, piperidine and pyridine alkaloid biosynthesis	Metabolism;Metabolism;Metabolism;Metabolism;Metabolism;Metabolism;Environmental Information Processing;Metabolism;Genetic Information Processing;Metabolism	Global and overview maps;Amino acid metabolism;Global and overview maps;Amino acid metabolism;Global and overview maps;Metabolism of cofactors and vitamins;Membrane transport;Global and overview maps;Translation;Biosynthesis of other secondary metabolites		Organic acids and derivatives	Carboxylic acids and derivatives	Amino acids, peptides, and analogues	M+H
metab_15532	449.179	0.7137	Uvedalin	-	-	-	-	C23H28O9	-	-	-	-	-	-	-	-		-	-	-	M+H
metab_15536	247.14	0.7137	Octopine	-	-	-	-	C9H18N4O4	C04137	D-Octopine;N2-(D-1-Carboxyethyl)-L-arginine;N2-(1-Carboxyethyl)-L-arginine;Arginine, N2-(1-carboxyethyl)-, L-;D-(+)-Octopine;L-Arginine, N2-(1-carboxyethyl)-, (R)-;L-Arginine, N2-[(1R)-1-carboxyethyl]-;Octopine	-	-	map02010;map00330	ABC transporters; Arginine and proline metabolism	Environmental Information Processing;Metabolism	Membrane transport;Amino acid metabolism		-	-	-	M+H
metab_15537	238.071	0.7137	8-hydroxy-4-oxo-1H-quinoline-2-carboxylic acid	;MJDBWX000002300			-	C10H7NO4	-	-	-	-	-	-	-	-		-	-	-	M+CH3OH+H
metab_15540	180.086	0.7137	D-Galactosamine	-	-	-	-	C6H13NO5	C02262	D-Galactosamine;D-Chondrosamine;2-Amino-2-deoxy-D-galactose	Carbohydrates	Monosaccharides	map01100;map00052	Metabolic pathways; Galactose metabolism	Metabolism;Metabolism	Global and overview maps;Carbohydrate metabolism		-	-	-	M+H
metab_15541	165.054	0.7137	Caffeic aldehyde	HMDB0141767	(2E)-3-(3,4-dihydroxyphenyl)prop-2-enal	164.047	-	C9H8O3	C10945	Caffeic aldehyde;3,4-Dihydroxycinnamaldehyde;Caffeyl aldehyde	-	-	map00940;map01110	Phenylpropanoid biosynthesis; Biosynthesis of secondary metabolites	Metabolism;Metabolism	Biosynthesis of other secondary metabolites;Global and overview maps		Phenylpropanoids and polyketides	Cinnamaldehydes	Not Available	M+H
metab_15543	145.049	0.7137	(E)-3-methylglutaconic acid	LMFA01170068			-	C6H8O4	-	-	-	-	-	-	-	-		-	-	-	M+H
metab_15546	97.0287	0.7137	2-Cyclopentene-1,4-dione	-	-	-	-	C5H4O2	-	-	-	-	-	-	-	-		-	-	-	M+H
metab_15549	363.175	0.706733	Menthyl pyrrolidone carboxylate	HMDB0032368	Menthyl pyrrolidone carboxylate	318.204	52528-10-6	C16H30O6	C03962	(-)-Menthyl O-beta-D-glucoside	-	-	-	-	-	-		Lipids and lipid-like molecules	Prenol lipids	Terpene glycosides	M+2Na-H
metab_15563	189.134	0.699733	L-NMMA	HMDB0029416	L-Targinine	188.127	-	C7H16N4O2	C03884	N(omega)-Methyl-L-arginine;N(G)-Monomethyl-L-arginine	-	-	-	-	-	-		Organic acids and derivatives	Carboxylic acids and derivatives	Amino acids, peptides, and analogues	M+H
metab_15564	176.103	0.699733	Citrulline	HMDB0000904	Citrulline	175.096	372-75-8	C6H13N3O3	C00327	L-Citrulline;2-Amino-5-ureidovaleric acid;Citrulline	Peptides	Amino acids	map01100;map00220;map01110;map01230	Metabolic pathways; Arginine biosynthesis; Biosynthesis of secondary metabolites; Biosynthesis of amino acids	Metabolism;Metabolism;Metabolism;Metabolism	Global and overview maps;Amino acid metabolism;Global and overview maps;Global and overview maps		Organic acids and derivatives	Carboxylic acids and derivatives	Amino acids, peptides, and analogues	M+H
metab_15569	87.0444	0.692883	Oxolan-3-one	HMDB0002523	Oxolan-3-one	86.0368	22929-52-8	C4H6O2	-	-	-	-	-	-	-	-		Organoheterocyclic compounds	Dihydrofurans	Furanones	M+H
metab_15575	178.071	0.686083	4-Hydroxy-4-methylglutamate	-	-	-	-	C6H11NO5	C06034	4-Hydroxy-4-methylglutamate	-	-	map00660	C5-Branched dibasic acid metabolism	Metabolism	Carbohydrate metabolism		-	-	-	M+H
metab_15591	132.065	0.665467	Trans-4-Hydroxy-L-proline	HMDB0000725	4-Hydroxyproline	131.058	-	C5H9NO3	C01157	Hydroxyproline;L-Hydroxyproline;trans-4-Hydroxy-L-proline	Peptides	Amino acids	map01100;map02010;map00330	Metabolic pathways; ABC transporters; Arginine and proline metabolism	Metabolism;Environmental Information Processing;Metabolism	Global and overview maps;Membrane transport;Amino acid metabolism		Organic acids and derivatives	Carboxylic acids and derivatives	Amino acids, peptides, and analogues	M+H
metab_15595	101.071	0.665467	2,4-Diaminobutyrate	HMDB0002362	2,4-Diaminobutyric acid	118.074	-	C4H10N2O2	-	-	-	-	-	-	-	-		Organic acids and derivatives	Carboxylic acids and derivatives	Amino acids, peptides, and analogues	M+H-H2O
metab_15603	432.221	0.651517	Meclozine	HMDB0014875	Meclizine	390.186	-	C25H27ClN2	C07116	Meclizine;Meclozine	-	-	-	-	-	-		Benzenoids	Benzene and substituted derivatives	Diphenylmethanes	M+ACN+H
metab_15613	88.0397	0.644717	2-Aminoacrylic acid	HMDB0003609	2-Aminoacrylic acid	87.032	28453-71-6	C3H5NO2	C02218	Dehydroalanine;2-Aminoacrylate;2-Aminoprop-2-enoate	-	-	map01100;map00270	Metabolic pathways; Cysteine and methionine metabolism	Metabolism;Metabolism	Global and overview maps;Amino acid metabolism		Organic acids and derivatives	Carboxylic acids and derivatives	Amino acids, peptides, and analogues	M+H
metab_15614	90.0917	0.644717	Dimethylethanolamine	HMDB0032231	Dimethylethanolamine	89.0841	108-01-0	C4H11NO	C04308	Phosphatidyl-N-dimethylethanolamine	-	-	map01100;map00564;map01110	Metabolic pathways; Glycerophospholipid metabolism; Biosynthesis of secondary metabolites	Metabolism;Metabolism;Metabolism	Global and overview maps;Lipid metabolism;Global and overview maps		Organic nitrogen compounds	Organonitrogen compounds	Amines	M+H
metab_15620	246.156	0.637733	Beta-Alanyl-L-arginine	HMDB0060441	beta-Alanyl-L-arginine	245.149	-	C9H19N5O3	C05340	beta-Alanyl-L-arginine	-	-	map01100;map00410	Metabolic pathways; beta-Alanine metabolism	Metabolism;Metabolism	Global and overview maps;Metabolism of other amino acids		Organic acids and derivatives	Peptidomimetics	Hybrid peptides	M+H
metab_15625	103.087	0.637733	2-Pyrrolidinone	HMDB0002039	2-Pyrrolidinone	85.0528	616-45-5	C4H7NO	C11118	N-Methyl-2-pyrrolidinone;1-Methyl-2-pyrrolidinone;N-Methylpyrrolidone	-	-	-	-	-	-		Organoheterocyclic compounds	Pyrrolidines	Pyrrolidones	M+NH4
metab_15631	110.071	0.631033	4-Pyrimidine Methanamine (hydrochloride)	-	-	-	-	C5H7N3	-	-	-	-	-	-	-	-		-	-	-	M+H
metab_15652	236.079	0.6172	6-Succinoaminopurine	HMDB0013204	6-Succinoaminopurine	235.071	-	C9H9N5O3	-	-	-	-	-	-	-	-		Organoheterocyclic compounds	Imidazopyrimidines	Purines and purine derivatives	M+H
metab_15660	154.134	0.6172	5-Ethyl-2,3-dimethylpyrazine	HMDB0029727	5-Ethyl-2,3-dimethylpyrazine	136.1	15707-34-3	C8H12N2	-	-	-	-	-	-	-	-		Organoheterocyclic compounds	Diazines	Pyrazines	M+NH4
metab_15833	263.009	0.52805	(2E)-4-hydroxy-3-methylbut-2-en-1-yl trihydrogen diphosphate	LMPR01010009			-	C5H12O8P2	C11811	1-Hydroxy-2-methyl-2-butenyl 4-diphosphate;(E)-4-Hydroxy-3-methyl-but-2-enyl diphosphate;(E)-4-Hydroxy-3-methylbut-2-en-1-yl diphosphate	-	-	map01100;map01110;map00900	Metabolic pathways; Biosynthesis of secondary metabolites; Terpenoid backbone biosynthesis	Metabolism;Metabolism;Metabolism	Global and overview maps;Global and overview maps;Metabolism of terpenoids and polyketides		-	-	-	M+H
metab_16007	367.024	1.35213	Aflatoxin M1	HMDB0030479	Aflatoxin M1	328.058	6795-23-9	C17H12O7	C16756	Aflatoxin M1	-	-	-	-	-	-		Phenylpropanoids and polyketides	Coumarins and derivatives	Furanocoumarins	M+K
metab_16008	181.049	4.01588	Caffeic Acid	HMDB0003501;HMDB0001964	cis-Caffeic acid;Caffeic acid	180.042258744;180.042258744	501-16-6	C9H8O4	C01197	Caffeate;Caffeic acid;3,4-Dihydroxy-trans-cinnamate;trans-Caffeate;(2E)-3-(3,4-Dihydroxyphenyl)prop-2-enoate	-	-	map01100;map00940;map01110	Metabolic pathways; Phenylpropanoid biosynthesis; Biosynthesis of secondary metabolites	Metabolism;Metabolism;Metabolism	Global and overview maps;Biosynthesis of other secondary metabolites;Global and overview maps		Phenylpropanoids and polyketides	Cinnamic acids and derivatives	Hydroxycinnamic acids and derivatives	M+H
metab_16009	291.086	3.36063	Epicatechin	HMDB0002780;HMDB0001871;LMPK12020003	Catechin;Epicatechin	290.07903818;290.07903818	490-46-0	C15H14O6	C06562;C09727	(+)-Catechin;D-Catechin;Cyanidanol;(2R-trans)-2-(3,4-Dihydroxyphenyl)-3,4-dihydro-2H-1-benzopyran-3,5,7-triol;(2R,3S)-Catechin;(2R,3S)-(+)-Catechin;Cianidanol;(-)-Epicatechin	-	-	map01100;map00941;map01110	Metabolic pathways; Flavonoid biosynthesis; Biosynthesis of secondary metabolites	Metabolism;Metabolism;Metabolism	Global and overview maps;Biosynthesis of other secondary metabolites;Global and overview maps		Phenylpropanoids and polyketides	Flavonoids	Flavans	M+H
metab_16010	499.339	7.56702	Fusidic Acid	HMDB0015570;HMDB0001933	Fusidic Acid;Furosemide	516.345089268;330.007719869	6990-06-03	C31H48O6	C06694	Fusidic acid	Antibiotics	Others	-	-	-	-		Lipids and lipid-like molecules	Steroids and steroid derivatives	Steroid esters	M+H-H2O
metab_16011	118.065	3.62715	Indole	HMDB0000738;HMDB0035924	Indole;Pyrrole	117.057849229;67.042199165	120-72-9	C8H7N	C00463	Indole;2,3-Benzopyrrole	-	-	map01100;map00402;map00400;map01110;map00380	Metabolic pathways; Benzoxazinoid biosynthesis; Phenylalanine, tyrosine and tryptophan biosynthesis; Biosynthesis of secondary metabolites; Tryptophan metabolism	Metabolism;Metabolism;Metabolism;Metabolism;Metabolism	Global and overview maps;Biosynthesis of other secondary metabolites;Amino acid metabolism;Global and overview maps;Amino acid metabolism		Organoheterocyclic compounds	Indoles and derivatives	Indoles	M+H
metab_16012	146.06	3.1198	Indole-3-carboxaldehyde	HMDB0029737;HMDB0000197;HMDB0000195	Indole-3-carboxaldehyde;Indoleacetic acid;Inosine	145.052763851;175.063328537;268.080769514	487-89-8	C9H7NO	C08493	Indole-3-carboxaldehyde;Indole-3-carbaldehyde	-	-	-	-	-	-		Organoheterocyclic compounds	Indoles and derivatives	Indoles	M+H
metab_16013	124.039	0.755267	Isonicotinic acid	HMDB0041912;HMDB0060665	Isonicotinylglycine;Isonicotinic acid	180.053492132;123.032028409	55-22-1	C6H5NO2	C07446	Isonicotinic acid	-	-	-	-	-	-		Organic acids and derivatives	Carboxylic acids and derivatives	Amino acids, peptides, and analogues	M+H
metab_16014	226.118	2.88277	Kynurenine	HMDB0000684	L-Kynurenine	208.085	-	C10H12N2O3	C00328	L-Kynurenine;3-Anthraniloyl-L-alanine	-	-	map01100;map00380	Metabolic pathways; Tryptophan metabolism	Metabolism;Metabolism	Global and overview maps;Amino acid metabolism		Organic oxygen compounds	Organooxygen compounds	Carbonyl compounds	M+H, M+NH4
metab_16015	148.06	0.686083	L-Glutamate	HMDB0003339;HMDB0060475;HMDB0000148	D-Glutamic acid;DL-Glutamate;L-Glutamic acid	147.053157781;147.053157781;147.053157781	-	C5H9NO4	C00025	L-Glutamate;L-Glutamic acid;L-Glutaminic acid;Glutamate	Peptides;Hormones and transmitters	Amino acids;Neurotransmitters	map01100;map00630;map00220;map01200;map00430;map01210;map00910;map02010;map00860;map00480;map00332;map00250;map01230;map00970;map00340;map01110;map00650;map00330;map00660	Metabolic pathways; Glyoxylate and dicarboxylate metabolism; Arginine biosynthesis; Carbon metabolism; Taurine and hypotaurine metabolism; 2-Oxocarboxylic acid metabolism; Nitrogen metabolism; ABC transporters; Porphyrin and chlorophyll metabolism; Glutathione metabolism; Carbapenem biosynthesis; Alanine, aspartate and glutamate metabolism; Biosynthesis of amino acids; Aminoacyl-tRNA biosynthesis…	Metabolism;Metabolism;Metabolism;Metabolism;Metabolism;Metabolism;Metabolism;Environmental Information Processing;Metabolism;Metabolism;Metabolism;Metabolism;Metabolism;Genetic Information Processing;Metabolism;Metabolism;Metabolism;Metabolism;Metabolism	Global and overview maps;Carbohydrate metabolism;Amino acid metabolism;Global and overview maps;Metabolism of other amino acids;Global and overview maps;Energy metabolism;Membrane transport;Metabolism of cofactors and vitamins;Metabolism of other amino acids;Biosynthesis of other secondary metabolites;Amino acid metabolism;Global and overview maps;Translation;Amino acid metabolism;Global and over…		Organic acids and derivatives	Carboxylic acids and derivatives	Amino acids, peptides, and analogues	M+H, M+ACN+Na
metab_16016	219.076	3.73315	N'-Formylkynurenine	HMDB0060485;HMDB0001200	L-Formylkynurenine;N'-Formylkynurenine	236.079706882;236.079706882	1022-31-7	C11H12N2O4	C02700	L-Formylkynurenine;N-Formyl-L-kynurenine;N-Formylkynurenine	-	-	map01100;map00380	Metabolic pathways; Tryptophan metabolism	Metabolism;Metabolism	Global and overview maps;Amino acid metabolism		Organic oxygen compounds	Organooxygen compounds	Carbonyl compounds	M+H-H2O
metab_16017	204.086	0.720683	N-Acetyl-D-galactosamine	HMDB0000212;HMDB0000853	N-Acetylgalactosamine;N-Acetyl-b-D-galactosamine	221.089937217;221.089937217	-	C8H15NO6	C01132	N-Acetyl-D-galactosamine;N-Acetyl-D-chondrosamine;2-Acetamido-2-deoxy-D-galactose	Carbohydrates	Monosaccharides	map01100;map00052	Metabolic pathways; Galactose metabolism	Metabolism;Metabolism	Global and overview maps;Carbohydrate metabolism		Organic oxygen compounds	Organooxygen compounds	Carbohydrates and carbohydrate conjugates	M+H-H2O, M+H, M+Na, M+H-2H2O
metab_16018	227.179	7.01313	Panaxynol	LMFA05000689;LMFA05000019;HMDB0039588	Panaxynol	244.183	81203-57-8	C17H24O	C08450	Falcarinol;Panaxynol	-	-	-	-	-	-		Lipids and lipid-like molecules	Fatty Acyls	Fatty alcohols	M+H-H2O, M+H
metab_16019	95.0495	2.97555	Phenol	HMDB0000228;HMDB0013674	Phenol;1,2,3-Trihydroxybenzene	94.041864814;126.031694058	108-95-2	C6H6O	C00146	Phenol;Benzenol;Hydroxybenzene;Phenic acid;Phenylic acid	-	-	map01100;map00350	Metabolic pathways; Tyrosine metabolism	Metabolism;Metabolism	Global and overview maps;Amino acid metabolism		Benzenoids	Phenols	1-hydroxy-4-unsubstituted benzenoids	M+H-H2O, M+H
metab_16020	105.07	3.32228	Styrene	HMDB0034240	Styrene	104.063	100-42-5	C8H8	C07083	Styrene;Phenylethylene	-	-	map01100	Metabolic pathways	Metabolism	Global and overview maps		Benzenoids	Benzene and substituted derivatives	Styrenes	M+H, M+NH4, M+ACN+H
metab_16021	364.121	0.631033	Xylose	HMDB0000098	D-Xylose	150.053	-	C5H10O5	C00181	D-Xylose;Wood sugar	Carbohydrates	Monosaccharides	map01100;map00520;map00040;map02010	Metabolic pathways; Amino sugar and nucleotide sugar metabolism; Pentose and glucuronate interconversions; ABC transporters	Metabolism;Metabolism;Metabolism;Environmental Information Processing	Global and overview maps;Carbohydrate metabolism;Carbohydrate metabolism;Membrane transport		Organic oxygen compounds	Organooxygen compounds	Carbohydrates and carbohydrate conjugates	2M+ACN+Na
metab_16025	302.066	4.16938	Adenosine	HMDB0000050	Adenosine	267.097	58-61-7	C10H13N5O4	C00212	Adenosine	Nucleic acids	Nucleosides	map01100;map02010;map00230	Metabolic pathways; ABC transporters; Purine metabolism	Metabolism;Environmental Information Processing;Metabolism	Global and overview maps;Membrane transport;Nucleotide metabolism		Nucleosides, nucleotides, and analogues	Purine nucleosides	Not Available	M+Cl, 2M-H, M+FA-H, M-H
metab_16041	282.084	3.08713	Guanosine	HMDB0000133	Guanosine	283.092	118-00-3	C10H13N5O5	C00387	Guanosine	Nucleic acids	Nucleosides	map01100;map02010;map00230	Metabolic pathways; ABC transporters; Purine metabolism	Metabolism;Environmental Information Processing;Metabolism	Global and overview maps;Membrane transport;Nucleotide metabolism		Nucleosides, nucleotides, and analogues	Purine nucleosides	Not Available	M-H, 2M-H, M+Na-2H
metab_16057	401.145	6.09072	4-(beta-D-Glucopyranosyloxy)benzyl 2,3-dihydroxy-3-methylbutanoate	-	-	-	-	C18H26O10	-	-	-	-	-	-	-	-		-	-	-	M-H, M+Cl, M+FA-H
metab_16060	253.092	0.77015	Galactosylglycerol	HMDB0006790	Galactosylglycerol	254.1	-	C9H18O8	C05401	3-beta-D-Galactosyl-sn-glycerol;Galactosylglycerol	-	-	map00561;map00052	Glycerolipid metabolism; Galactose metabolism	Metabolism;Metabolism	Lipid metabolism;Carbohydrate metabolism		Lipids and lipid-like molecules	Glycerolipids	Glycosylglycerols	M-H, 2M+FA-H, M+Na-2H
metab_16065	395.192	6.42558	1-Hexanol arabinosylglucoside	HMDB0031689	1-Hexanol arabinosylglucoside	396.2	124044-06-0	C17H32O10	-	-	-	-	-	-	-	-		Lipids and lipid-like molecules	Fatty Acyls	Fatty acyl glycosides	M-H, M+FA-H, M+Cl
metab_16073	145.05	0.77015	Adipic acid	HMDB0000448;LMFA01170048	Adipic acid	146.058	124-04-9	C6H10O4	C06104	Adipate;Adipic acid;Hexanedioate;Hexan-1,6-dicarboxylate	Organic acids	Carboxylic acids	map01100	Metabolic pathways	Metabolism	Global and overview maps		Lipids and lipid-like molecules	Fatty Acyls	Fatty acids and conjugates	M-H2O-H, M-H, 2M-H
metab_16079	243.062	2.23607	Uridine	HMDB0000296	Uridine	244.07	58-96-8	C9H12N2O6	C00299	Uridine	Nucleic acids	Nucleosides	map00240;map01100;map02010	Pyrimidine metabolism; Metabolic pathways; ABC transporters	Metabolism;Metabolism;Environmental Information Processing	Nucleotide metabolism;Global and overview maps;Membrane transport		Nucleosides, nucleotides, and analogues	Pyrimidine nucleosides	Not Available	M-H, 2M-H, M+Cl
metab_16085	677.375	7.09147	Gingerglycolipid B	HMDB0041094	Gingerglycolipid B	678.383	88168-90-5	C33H58O14	-	-	-	-	-	-	-	-		Lipids and lipid-like molecules	Glycerolipids	Glycosylglycerols	M-H, M+FA-H, M+Na-2H
metab_16094	117.018	0.564033	Erythronolactone	-	-	-	-	C4H6O4	-	-	-	-	-	-	-	-		-	-	-	M-H, M+FA-H
metab_16096	259.022	0.559833	D-Mannose 6-phosphate	HMDB0001078	Mannose 6-phosphate	260.03	-	C6H13O9P	C00275	D-Mannose 6-phosphate	-	-	map01100;map00520;map01110;map00051	Metabolic pathways; Amino sugar and nucleotide sugar metabolism; Biosynthesis of secondary metabolites; Fructose and mannose metabolism	Metabolism;Metabolism;Metabolism;Metabolism	Global and overview maps;Carbohydrate metabolism;Global and overview maps;Carbohydrate metabolism		Organic oxygen compounds	Organooxygen compounds	Carbohydrates and carbohydrate conjugates	M-H, 2M-H
metab_16112	267.072	0.60785	Ethyl-beta-glucuronide	-	-	-	-	C8H14O7	-	-	-	-	-	-	-	-		-	-	-	M+Na-2H, M+FA-H
metab_16117	195.05	0.614233	Gluconic acid	HMDB0000625	Gluconic acid	196.058	526-95-4	C6H12O7	C00257	D-Gluconic acid;D-Gluconate;D-gluco-Hexonic acid	Carbohydrates	Monosaccharides	map01100;map00030;map01110;map01200	Metabolic pathways; Pentose phosphate pathway; Biosynthesis of secondary metabolites; Carbon metabolism	Metabolism;Metabolism;Metabolism;Metabolism	Global and overview maps;Carbohydrate metabolism;Global and overview maps;Global and overview maps		Organic oxygen compounds	Organooxygen compounds	Carbohydrates and carbohydrate conjugates	M-H, 2M-H
metab_16138	149.045	0.6723	Rac 3-Hydroxyisobutyric acid	-	-	-	-	C4H8O3	-	-	-	-	-	-	-	-		-	-	-	M-H, M+FA-H
metab_16142	289.115	0.6723	Argininosuccinic acid	HMDB0000052	Argininosuccinic acid	290.123	2387-71-5	C10H18N4O6	C03406	N-(L-Arginino)succinate;2-(Nomega-L-Arginino)succinate;L-Argininosuccinate;L-Argininosuccinic acid;L-Arginosuccinic acid	Peptides	Amino acids	map01100;map00220;map00250;map01110;map01230	Metabolic pathways; Arginine biosynthesis; Alanine, aspartate and glutamate metabolism; Biosynthesis of secondary metabolites; Biosynthesis of amino acids	Metabolism;Metabolism;Metabolism;Metabolism;Metabolism	Global and overview maps;Amino acid metabolism;Amino acid metabolism;Global and overview maps;Global and overview maps		Organic acids and derivatives	Carboxylic acids and derivatives	Amino acids, peptides, and analogues	M-H, M+K-2H
metab_16157	128.034	0.71815	Pyroglutamic acid	HMDB0000267	Pyroglutamic acid	129.043	98-79-3	C5H7NO3	C01879	5-Oxoproline;Pidolic acid;Pyroglutamic acid;5-Pyrrolidone-2-carboxylic acid;Pyroglutamate;5-Oxo-L-proline;L-Pyroglutamic acid;L-5-Pyrrolidone-2-carboxylic acid	Peptides	Amino acids	map01100;map00480	Metabolic pathways; Glutathione metabolism	Metabolism;Metabolism	Global and overview maps;Metabolism of other amino acids		Organic acids and derivatives	Carboxylic acids and derivatives	Amino acids, peptides, and analogues	M-H, M+Na-2H
metab_16166	145.086	2.74958	3-Hydroxyisoheptanoic acid	HMDB0002207	3-Hydroxyisoheptanoic acid	146.094	40309-49-7	C7H14O3	-	-	-	-	-	-	-	-		Organic acids and derivatives	Hydroxy acids and derivatives	Medium-chain hydroxy acids and derivatives	M-H2O-H, M-H
metab_16170	375.129	2.92885	Loganate	-	-	-	-	C16H24O10	C01512	Loganate;Loganic acid	-	-	map01110;map00902	Biosynthesis of secondary metabolites; Monoterpenoid biosynthesis	Metabolism;Metabolism	Global and overview maps;Metabolism of terpenoids and polyketides		-	-	-	M-H2O-H, M-H
metab_16172	267.073	2.89167	Inosine	HMDB0000195	Inosine	268.081	58-63-9	C10H12N4O5	C00294	Inosine	-	-	map01100;map02010;map00230	Metabolic pathways; ABC transporters; Purine metabolism	Metabolism;Environmental Information Processing;Metabolism	Global and overview maps;Membrane transport;Nucleotide metabolism		Nucleosides, nucleotides, and analogues	Purine nucleosides	Not Available	M-H, M+Na-2H
metab_16196	236.092	3.85663	N-lactoyl-Phenylalanine	HMDB0062175	N-Lactoylphenylalanine	237.1	-	C12H15NO4	-	-	-	-	-	-	-	-		Organic acids and derivatives	Carboxylic acids and derivatives	Amino acids, peptides, and analogues	M-H, M+Na-2H
metab_16201	337.092	3.79745	3-p-Coumaroylquinic acid	-	-	-	-	C16H18O8	-	-	-	-	-	-	-	-		-	-	-	M-2H, M-H
metab_16209	275.103	4.16938	Tyrosyl-Hydroxyproline	HMDB0029106	鈥婽yrosylhydroxyproline	294.122	-	C14H18N2O5	-	-	-	-	-	-	-	-		Organic acids and derivatives	Carboxylic acids and derivatives	Amino acids, peptides, and analogues	M-H2O-H, M+Cl
metab_16215	469.135	4.60543	Plumieride	-	-	-	-	C21H26O12	C09797	Plumieride	-	-	-	-	-	-		-	-	-	M-2H, M-H
metab_16238	451.124	5.46278	3,4,5-trihydroxy-6-{3-[2-hydroxy-3-(2,4,6-trihydroxyphenyl)propyl]phenoxy}oxane-2-carboxylic acid	HMDB0127751	3,4,5-trihydroxy-6-{3-[2-hydroxy-3-(2,4,6-trihydroxyphenyl)propyl]phenoxy}oxane-2-carboxylic acid	452.132	-	C21H24O11	-	-	-	-	-	-	-	-		Organic oxygen compounds	Organooxygen compounds	Carbohydrates and carbohydrate conjugates	M-H, 2M-H
metab_16239	357.061	5.49583	PSOROMIC ACID	-	-	-	-	C18H14O8	-	-	-	-	-	-	-	-		-	-	-	M-2H, M-H
metab_16244	431.155	5.6324	Methylsyringin	HMDB0039570	Methylsyringin	386.158	139742-20-4	C18H26O9	-	-	-	-	-	-	-	-		Organic oxygen compounds	Organooxygen compounds	Carbohydrates and carbohydrate conjugates	M-H, M+FA-H
metab_16260	209.081	6.03817	Nonic Acid	HMDB0011717	Nonate	188.105	-	C9H16O4	-	-	-	-	-	-	-	-		Lipids and lipid-like molecules	Fatty Acyls	Fatty acids and conjugates	M-H, M+Na-2H
metab_16268	299.019	6.13525	Rhodocladonic Acid	-	-	-	-	C15H10O8	-	-	-	-	-	-	-	-		-	-	-	M-H2O-H, M-H
metab_16270	195.066	6.13525	2-Methoxy-4-vinylphenol	HMDB0013744	2-Methoxy-4-vinylphenol	150.068	7786-61-0	C9H10O2	C17883	4-Vinylguaiacol	-	-	-	-	-	-		Benzenoids	Phenols	Methoxyphenols	M-H2O-H, M+FA-H
metab_16272	167.071	6.1222	2-(1-hydroxyethyl)-4-(2-hydroxypropyl)-2H-furan-5-one	-	-	-	-	C9H14O4	-	-	-	-	-	-	-	-		-	-	-	M-H2O-H, M-H
metab_16280	227.128	6.21773	2-Methyl-4-pentenoic Acid	LMFA01030972;HMDB0031158;MJDBOTE0000735	2-Methyl-4-pentenoic acid	114.068	1575-74-2	C6H10O2	-	-	-	-	-	-	-	-		Lipids and lipid-like molecules	Fatty Acyls	Fatty acids and conjugates	M-H, 2M-H
metab_16289	301.071	6.26123	Hesperetin	HMDB0005782;LMPK12140003	Hesperetin	302.079	520-33-2	C16H14O6	C01709	Hesperetin;3',5,7-Trihydroxy-4'-methoxyflavanone	-	-	map00941	Flavonoid biosynthesis	Metabolism	Biosynthesis of other secondary metabolites		Phenylpropanoids and polyketides	Flavonoids	O-methylated flavonoids	M-H, 3M-H
metab_16290	177.055	6.26123	4-Hydroxy-3-methoxycinnamaldehyde	HMDB0141782	Coniferaldehyde	178.063	-	C10H10O3	C02666	Coniferyl aldehyde;Coniferaldehyde;4-Hydroxy-3-methoxycinnamaldehyde;Ferulaldehyde	-	-	map01100;map00940;map01110	Metabolic pathways; Phenylpropanoid biosynthesis; Biosynthesis of secondary metabolites	Metabolism;Metabolism;Metabolism	Global and overview maps;Biosynthesis of other secondary metabolites;Global and overview maps		Benzenoids	Phenols	Methoxyphenols	M-H, 2M+FA-H
metab_16311	557.223	6.3501	Glaucarubol 15-O-beta-D-glucopyranoside	HMDB0035909	Glaucarubol 15-O-beta-D-glucopyranoside	558.231	89202-77-7	C26H38O13	-	-	-	-	-	-	-	-		Lipids and lipid-like molecules	Fatty Acyls	Fatty acyl glycosides	M-H2O-H, M-H
metab_16316	555.224	6.36165	7,8-Dihydrovomifoliol 9-[apiosyl-(1->6)-glucoside]	HMDB0029771	7,8-Dihydrovomifoliol 9-[apiosyl-(1|right|6)-glucoside]	520.252	177261-70-0	C24H40O12	-	-	-	-	-	-	-	-		Lipids and lipid-like molecules	Fatty Acyls	Fatty acyl glycosides	M-H2O-H, M+Cl
metab_16332	307.191	6.42955	Albocycline	-	-	-	-	C18H28O4	-	-	-	-	-	-	-	-		-	-	-	M-H2O-H, M-H
metab_16335	266.14	6.4399	Atenolol acid	-	-	-	-	C14H21NO4	-	-	-	-	-	-	-	-		-	-	-	M-H2O-H, M-H
metab_16336	249.149	6.4399	6,7-bis(hydroxymethyl)-4,9a-dimethyl-2,7,8,9-tetrahydro-1H-benzo[7]annulen-3-one	-	-	-	-	C15H22O3	-	-	-	-	-	-	-	-		-	-	-	M-H2O-H, M-H
metab_16369	577.374	6.55015	Asparagoside A	HMDB0030046	Asparagoside A	578.382	14835-43-9	C33H54O8	C08886	Asparagoside A;(25S)-5beta-Spirostan-3beta-ol 3-O-beta-D-glucoside	-	-	-	-	-	-		Lipids and lipid-like molecules	Fatty Acyls	Fatty acids and conjugates	M-2H, M-H
metab_16372	257.175	6.56648	2,6,10,10-Tetramethyl-1-oxaspiro[4.5]decan-6-ol	HMDB0037907	2,6,10,10-Tetramethyl-1-oxaspiro[4.5]decan-6-ol	212.178	53398-90-6	C13H24O2	-	-	-	-	-	-	-	-		Organoheterocyclic compounds	Tetrahydrofurans	Not Available	M+Na-2H, M+FA-H
metab_16390	263.129	6.63993	(R)-Pterosin B	HMDB0030759	(R)-Pterosin B	218.131	34175-96-7	C14H18O2	-	-	-	-	-	-	-	-		Benzenoids	Indanes	Indanones	M-H, M+FA-H
metab_16394	531.369	6.65357	5-Butyl-2-furanoctanoic acid	HMDB0112097	5-Butyl-2-furanoctanoic acid	266.188	-	C16H26O3	-	-	-	-	-	-	-	-		Lipids and lipid-like molecules	Fatty Acyls	Fatty acids and conjugates	M-H2O-H, 2M-H
metab_16428	385.259	6.73692	Cryptomeridiol 11-rhamnoside	HMDB0038018	Cryptomeridiol 11-rhamnoside	386.267	349112-30-7	C21H38O6	-	-	-	-	-	-	-	-		Lipids and lipid-like molecules	Prenol lipids	Sesquiterpenoids	M-H2O-H, M-H
metab_16443	395.353	6.90682	MG(0:0/22:0/0:0)	HMDB0011551	MG(0:0/22:0/0:0)	414.371	-	C25H50O4	-	-	-	-	-	-	-	-		Lipids and lipid-like molecules	Glycerolipids	Monoradylglycerols	M-H2O-H, M+Na-2H
metab_16453	625.447	6.97355	DG(9D3/9D3/0:0)	HMDB0116428	DG(9D3/9D3/0:0)	644.465	-	C39H64O7	-	-	-	-	-	-	-	-		Lipids and lipid-like molecules	Fatty Acyls	Fatty acids and conjugates	M-H2O-H, M-H
metab_16466	726.552	7.06437	Cerebroside B	HMDB0035990;LMSP05010133	Cerebroside B	727.56	88642-46-0	C41H77NO9	-	-	-	-	-	-	-	-		Lipids and lipid-like molecules	Sphingolipids	Glycosphingolipids	M-H, M+Cl
metab_16471	471.347	7.08773	4alpha-formyl-4beta-methyl-5alpha-cholesta-8,24-dien-3beta-ol	HMDB0012167;HMDB0062387;LMST01010229	4alpha-Formyl-4beta-methyl-5alpha-cholesta-8,24-dien-3beta-ol;4|alpha|-formyl-4|beta|-methyl-5|alpha|-cholesta-8,24-dien-3|beta|-ol	426.349780716;426.349780721	-	C29H46O2	-	-	-	-	-	-	-	-		Lipids and lipid-like molecules	Prenol lipids	Triterpenoids	M-H, M+FA-H
metab_16483	518.325	7.17497	1-(9Z,12Z-Octadecadienoyl-2-hydroxy-sn-glycero-3-phosphocholine	-	-	-	-	C26H50NO7P	-	-	-	-	-	-	-	-		-	-	-	M-H, M+FA-H
metab_16486	321.243	7.21282	Austroinulin	HMDB0036802	Austroinulin	322.251	62868-75-1	C20H34O3	-	-	-	-	-	-	-	-		Lipids and lipid-like molecules	Prenol lipids	Diterpenoids	M-H2O-H, M-H
metab_16490	314.27	7.23005	Dehydrophytosphingosine	HMDB0038057;LMSP01030002	Dehydrophytosphingosine	315.277	3687-54-5	C18H37NO3	-	-	-	-	-	-	-	-		Organic nitrogen compounds	Organonitrogen compounds	Amines	M-H2O-H, M-H
metab_16494	494.325	7.26328	PC(16:0/0:0)[U]	-	-	-	-	C24H50NO7P	-	-	-	-	-	-	-	-		-	-	-	M-H, M+FA-H
metab_16524	345.283	7.49633	2-Arachidonyl Glycerol ether	HMDB0013657	2-Arachidonyl Glycerol ether	364.298	222723-55-9	C23H40O3	-	-	-	-	-	-	-	-		Lipids and lipid-like molecules	Endocannabinoids	Not Available	M-H2O-H, M+Na-2H
metab_16533	833.519	7.5959	Phosphatidylinositol 16:0-18:2	-	-	-	-	C43H79O13P	-	-	-	-	-	-	-	-		-	-	-	M-H, M+Na-2H
metab_16541	591.426	7.6778	Annonisin	HMDB0031394	Annonisin	610.444	194413-43-9	C35H62O8	-	-	-	-	-	-	-	-		Lipids and lipid-like molecules	Fatty Acyls	Fatty alcohols	M-H2O-H, M-H
metab_16546	311.222	7.72538	MJAW00213	;MJAW00213			-	C18H34O5	-	-	-	-	-	-	-	-		-	-	-	M-H2O-H, M-H
metab_16560	443.316	7.90123	Kobusone	HMDB0036790	Kobusone	222.162	24173-71-5	C14H22O2	C16983	Kobusone	-	-	-	-	-	-		Organic oxygen compounds	Organooxygen compounds	Carbonyl compounds	M+Na-2H, 2M-H
metab_16599	441.373	8.73223	(20S)-Protopanaxadiol	;MJDBOTE0000998			-	C30H52O3	C20715	Protopanaxadiol;Dammar-24-ene-3beta,12beta,20-triol;(20S)-Protopanaxadiol	-	-	-	-	-	-		-	-	-	M-H2O-H, M-H
metab_16602	671.466	8.58402	PA(16:0/18:2(9Z,12Z))	LMGP10010023;HMDB0007860	PA(16:0/18:2(9Z,12Z))	672.473	-	C37H69O8P	C00416	Phosphatidate;Phosphatidic acid;1,2-Diacyl-sn-glycerol 3-phosphate;3-sn-Phosphatidate	Lipids	Phospholipids	map01100;map00564;map01110;map00561;map04070	Metabolic pathways; Glycerophospholipid metabolism; Biosynthesis of secondary metabolites; Glycerolipid metabolism; Phosphatidylinositol signaling system	Metabolism;Metabolism;Metabolism;Metabolism;Environmental Information Processing	Global and overview maps;Lipid metabolism;Global and overview maps;Lipid metabolism;Signal transduction		Lipids and lipid-like molecules	Glycerophospholipids	Glycerophosphates	M-H, M+Na-2H
metab_16606	435.347	8.29595	5beta-Cholestane-3alpha,7alpha,24,26-tetrol	HMDB0062417;LMST04030023	5beta-Cholestane-3alpha,7alpha,24,26-tetrol	436.355	-	C27H48O4	-	-	-	-	-	-	-	-		Lipids and lipid-like molecules	Steroids and steroid derivatives	Bile acids, alcohols and derivatives	M-H2O-H, M-H
metab_16608	695.465	7.56375	PA(18:1(11Z)/18:3(6Z,9Z,12Z))	HMDB0114903	PA(18:1(11Z)/18:3(6Z,9Z,12Z))	696.473	-	C39H69O8P	-	-	-	-	-	-	-	-		Lipids and lipid-like molecules	Glycerophospholipids	Glycerophosphates	M-H, M+Na-2H
metab_16638	363.254	6.70007	Misoprostol	HMDB0015064	Misoprostol	382.272	59122-46-2	C22H38O5	-	-	-	-	-	-	-	-		Lipids and lipid-like molecules	Fatty Acyls	Eicosanoids	M-H2O-H, M+Na-2H
metab_16641	445.296	6.68638	Neoporrigenin B	HMDB0032680	Neoporrigenin B	446.303	196607-74-6	C27H42O5	-	-	-	-	-	-	-	-		Lipids and lipid-like molecules	Prenol lipids	Triterpenoids	M-H, M+Na-2H
metab_16673	295.227	6.57775	9(R)-HODE	-	-	-	-	C18H32O3	-	-	-	-	-	-	-	-		-	-	-	M-H, M+Na-2H
metab_16695	341.269	6.48707	MEDICA 16	-	-	-	-	C20H38O4	-	-	-	-	-	-	-	-		-	-	-	M-2H, M-H
metab_16707	587.255	6.43303	Cortolone-3-glucuronide	HMDB0010320	Cortolone-3-glucuronide	542.273	56162-46-0	C27H42O11	-	-	-	-	-	-	-	-		Lipids and lipid-like molecules	Steroids and steroid derivatives	Steroidal glycosides	M-H, M+FA-H
metab_16712	545.26	6.42113	Canavalioside	HMDB0036317	Canavalioside	546.268	316141-31-8	C26H42O12	-	-	-	-	-	-	-	-		Lipids and lipid-like molecules	Prenol lipids	Terpene glycosides	M-H, M+K-2H
metab_16713	367.118	6.42558	Glabrene	HMDB0029530;LMPK12080060	Glabrene	322.121	60008-03-9	C20H18O4	-	-	-	-	-	-	-	-		Phenylpropanoids and polyketides	Isoflavonoids	Pyranoisoflavonoids	M+FA-H, 2M-H
metab_16716	215.107	6.41717	3-[4-Hydroxy-3-(3-methyl-2-butenyl)phenyl]-2-propenal	HMDB0040833	3-[4-Hydroxy-3-(3-methyl-2-butenyl)phenyl]-2-propenal	216.115	-	C14H16O2	-	-	-	-	-	-	-	-		Phenylpropanoids and polyketides	Cinnamaldehydes	Not Available	M-H2O-H, M-H
metab_16727	392.229	6.39468	Leu-Leu-Leu	HMDB0094648	Leu-Leu-Leu	357.263	-	C18H35N3O4	-	-	-	-	-	-	-	-		Organic acids and derivatives	Carboxylic acids and derivatives	Amino acids, peptides, and analogues	M-H, M+Cl
metab_16728	325.202	6.39468	Aleuritic Acid	LMFA01050101;MJDBOTE0000482			-	C16H32O5	-	-	-	-	-	-	-	-		-	-	-	M-H, M+Na-2H
metab_16768	179.071	6.28827	Coniferyl alcohol	HMDB0012915	Coniferyl alcohol	180.079	32811-40-8	C10H12O3	C00590	Coniferyl alcohol;Coniferol;4-(3-Hydroxy-1-propenyl)-2-methoxyphenol;trans-Coniferyl alcohol	-	-	map01100;map00940;map00998;map01110	Metabolic pathways; Phenylpropanoid biosynthesis; Biosynthesis of various secondary metabolites - part 2; Biosynthesis of secondary metabolites	Metabolism;Metabolism;Metabolism;Metabolism	Global and overview maps;Biosynthesis of other secondary metabolites;Biosynthesis of other secondary metabolites;Global and overview maps		Benzenoids	Phenols	Methoxyphenols	M-H2O-H, M-H
metab_16770	523.218	6.27808	(8R,8'R)-Secoisolariciresinol 9-glucoside	HMDB0037083	(8R,8'R)-Secoisolariciresinol 9-glucoside	524.226	63320-67-2	C26H36O11	-	-	-	-	-	-	-	-		Lignans, neolignans and related compounds	Lignan glycosides	Not Available	M-H, M+Cl
metab_16798	255.077	6.16883	Threoninyl-Threonine	HMDB0029071	Threonylthreonine	220.106	-	C8H16N2O5	-	-	-	-	-	-	-	-		Organic acids and derivatives	Carboxylic acids and derivatives	Amino acids, peptides, and analogues	M+Cl, 2M+FA-H
metab_16820	479.199	0.78385	N2-Maltulosylarginine	HMDB0041542	N2-Maltulosylarginine	498.217	162966-06-5	C18H34N4O12	-	-	-	-	-	-	-	-		Lipids and lipid-like molecules	Saccharolipids	Not Available	M-H2O-H, M-H
metab_16837	283.072	0.967667	Gamma-Glutamylvaline	HMDB0011172	gamma-Glutamylvaline	246.122	2746-34-1	C10H18N2O5	-	-	-	-	-	-	-	-		Organic acids and derivatives	Carboxylic acids and derivatives	Amino acids, peptides, and analogues	M-H, M+K-2H
metab_16840	631.22	0.763367	[(1S,16R)-5,11-dihydroxy-8,8,10,12,16-pentamethyl-3-[1-(2-methyl-1,3-thiazol-4-yl)prop-1-en-2-yl]-9-oxo-17-oxa-4-azabicyclo[14.1.0]heptadec-4-en-7-yl]oxidanesulfonic acid	HMDB0127541	[(1S,16R)-5,11-dihydroxy-8,8,10,12,16-pentamethyl-3-[1-(2-methyl-1,3-thiazol-4-yl)prop-1-en-2-yl]-9-oxo-17-oxa-4-azabicyclo[14.1.0]heptadec-4-en-7-yl]oxidanesulfonic acid	586.238	-	C27H42N2O8S2	-	-	-	-	-	-	-	-		Organoheterocyclic compounds	Azoles	Thiazoles	M+Na-2H, M+FA-H
metab_16844	541.109	1.08153	Manninotriose	HMDB0060468;MJDBOTE0000247	D-Gal alpha 1|right|6D-Gal alpha 1|right|6D-Glucose	504.169	-	C18H32O16	C05404	D-Gal alpha 1|right|6D-Gal alpha 1|right|6D-Glucose;D-Gal-alpha1|right|6D-Gal-alpha1|right|6D-Glucose;Manninotriose	-	-	map01100;map00052	Metabolic pathways; Galactose metabolism	Metabolism;Metabolism	Global and overview maps;Carbohydrate metabolism		Organic oxygen compounds	Organooxygen compounds	Carbohydrates and carbohydrate conjugates	M+Cl, M+K-2H
metab_16857	184.061	0.763367	3-Amino-2,3-dihydrobenzoic acid	-	-	-	-	C7H9NO2	C12110	Gabaculine;3-Amino-2,3-dihydrobenzoic acid	-	-	-	-	-	-		-	-	-	M-H, M+FA-H
metab_16893	319.078	0.505783	5-Hydroxymethyluridine	-	-	-	-	C10H14N2O7	-	-	-	-	-	-	-	-		-	-	-	M+FA-H
metab_16903	257.066	0.518367	Valtrate	HMDB0034493	Valtrate	212.068	18296-44-1	C10H12O5	C09801	Valtratum;Valtrate	-	-	-	-	-	-		Lipids and lipid-like molecules	Prenol lipids	Monoterpenoids	M+FA-H
metab_16911	209.03	0.5547	D-Glucarate	HMDB0000663	Glucaric acid	210.038	-	C6H10O8	C00818	D-Glucarate;D-Glucaric acid;L-Gularic acid;D-Saccharic acid;D-Glucosaccharic acid;Glucaric acid;Glucarate	-	-	map01100;map00053	Metabolic pathways; Ascorbate and aldarate metabolism	Metabolism;Metabolism	Global and overview maps;Carbohydrate metabolism		Organic oxygen compounds	Organooxygen compounds	Carbohydrates and carbohydrate conjugates	M-H
metab_16918	186.04	0.56975	1-(Malonylamino)cyclopropanecarboxylic acid	HMDB0031700	1-(Malonylamino)cyclopropanecarboxylic acid	187.048	80550-27-2	C7H9NO5	-	-	-	-	-	-	-	-		Organic acids and derivatives	Carboxylic acids and derivatives	Amino acids, peptides, and analogues	M-H
metab_16928	431.026	0.5846	3,4,5-trihydroxy-6-({3-[3-methoxy-4-(sulfooxy)phenyl]prop-2-enoyl}oxy)oxane-2-carboxylic acid	HMDB0128060	3,4,5-trihydroxy-6-({3-[3-methoxy-4-(sulfooxy)phenyl]prop-2-enoyl}oxy)oxane-2-carboxylic acid	450.047	-	C16H18O13S	-	-	-	-	-	-	-	-		Phenylpropanoids and polyketides	Tannins	Hydrolyzable tannins	M-H2O-H
metab_16930	421.075	0.589333	Trehalose 6-phosphate	HMDB0001124	Trehalose 6-phosphate	422.083	4484-88-2	C12H23O14P	C00689	alpha,alpha'-Trehalose 6-phosphate;Trehalose 6-phosphate	-	-	map01100;map00500;map01110	Metabolic pathways; Starch and sucrose metabolism; Biosynthesis of secondary metabolites	Metabolism;Metabolism;Metabolism	Global and overview maps;Carbohydrate metabolism;Global and overview maps		Organic oxygen compounds	Organooxygen compounds	Carbohydrates and carbohydrate conjugates	M-H
metab_16934	241.011	0.593567	D-Glucose 1-phosphate	HMDB0001586	Glucose 1-phosphate	260.03	-	C6H13O9P	C00103	D-Glucose 1-phosphate;alpha-D-Glucose 1-phosphate;Cori ester;D-Glucose alpha-1-phosphate	-	-	map01100;map01110;map00561;map00520;map00040;map00052;map00010;map00500;map00523	Metabolic pathways; Biosynthesis of secondary metabolites; Glycerolipid metabolism; Amino sugar and nucleotide sugar metabolism; Pentose and glucuronate interconversions; Galactose metabolism; Glycolysis / Gluconeogenesis; Starch and sucrose metabolism; Polyketide sugar unit biosynthesis	Metabolism;Metabolism;Metabolism;Metabolism;Metabolism;Metabolism;Metabolism;Metabolism;Metabolism	Global and overview maps;Global and overview maps;Lipid metabolism;Carbohydrate metabolism;Carbohydrate metabolism;Carbohydrate metabolism;Carbohydrate metabolism;Carbohydrate metabolism;Metabolism of terpenoids and polyketides		Organic oxygen compounds	Organooxygen compounds	Carbohydrates and carbohydrate conjugates	M-H2O-H
metab_16945	204.051	0.60325	L-trans-alpha-Amino-2-carboxycyclopropaneacetic acid	HMDB0034442	L-trans-alpha-Amino-2-carboxycyclopropaneacetic acid	159.053	117857-93-9	C6H9NO4	-	-	-	-	-	-	-	-		Organic acids and derivatives	Carboxylic acids and derivatives	Amino acids, peptides, and analogues	M+FA-H
metab_16948	455.081	0.60325	6-[1-carboxy-2-(4-methoxy-1-benzofuran-5-yl)-2-oxoethyl]-3,4,5-trihydroxyoxane-2-carboxylic acid	HMDB0129405	6-[1-carboxy-2-(4-methoxy-1-benzofuran-5-yl)-2-oxoethyl]-3,4,5-trihydroxyoxane-2-carboxylic acid	410.085	-	C18H18O11	-	-	-	-	-	-	-	-		Organic oxygen compounds	Organooxygen compounds	Carbohydrates and carbohydrate conjugates	M+FA-H
metab_16954	399.094	0.60785	Undulatoside	-	-	-	-	C16H18O9	-	-	-	-	-	-	-	-		-	-	-	M+FA-H
metab_16961	325.077	0.614233	3,4,5-trihydroxy-6-[(3-hydroxybutanoyl)oxy]oxane-2-carboxylic acid	HMDB0130130	3,4,5-trihydroxy-6-[(3-hydroxybutanoyl)oxy]oxane-2-carboxylic acid	280.079	-	C10H16O9	-	-	-	-	-	-	-	-		Organic oxygen compounds	Organooxygen compounds	Carbohydrates and carbohydrate conjugates	M+FA-H
metab_16984	169.985	0.628983	L-Aspartate	HMDB0000191	L-Aspartic acid	133.038	-	C4H7NO4	C00049	L-Aspartate;L-Aspartic acid;2-Aminosuccinic acid;L-Asp	Peptides;Hormones and transmitters	Amino acids;Neurotransmitters	map01100;map00220;map01110;map00770;map00300;map00760;map01210;map00270;map01200;map00260;map01230;map00460;map00250;map00710;map00970;map00261;map02010;map00410;map00340	Metabolic pathways; Arginine biosynthesis; Biosynthesis of secondary metabolites; Pantothenate and CoA biosynthesis; Lysine biosynthesis; Nicotinate and nicotinamide metabolism; 2-Oxocarboxylic acid metabolism; Cysteine and methionine metabolism; Carbon metabolism; Glycine, serine and threonine metabolism; Biosynthesis of amino acids; Cyanoamino acid metabolism; Alanine, aspartate and glutamate m…	Metabolism;Metabolism;Metabolism;Metabolism;Metabolism;Metabolism;Metabolism;Metabolism;Metabolism;Metabolism;Metabolism;Metabolism;Metabolism;Metabolism;Genetic Information Processing;Metabolism;Environmental Information Processing;Metabolism;Metabolism	Global and overview maps;Amino acid metabolism;Global and overview maps;Metabolism of cofactors and vitamins;Amino acid metabolism;Metabolism of cofactors and vitamins;Global and overview maps;Amino acid metabolism;Global and overview maps;Amino acid metabolism;Global and overview maps;Metabolism of other amino acids;Amino acid metabolism;Energy metabolism;Translation;Biosynthesis of other second…		Organic acids and derivatives	Carboxylic acids and derivatives	Amino acids, peptides, and analogues	M+K-2H
metab_17021	131.045	0.660017	L-Asparagine	HMDB0000168	L-Asparagine	132.053	70-47-3	C4H8N2O3	C00152	L-Asparagine;2-Aminosuccinamic acid	Peptides	Amino acids	map01100;map01110;map00460;map01230;map00250;map00970	Metabolic pathways; Biosynthesis of secondary metabolites; Cyanoamino acid metabolism; Biosynthesis of amino acids; Alanine, aspartate and glutamate metabolism; Aminoacyl-tRNA biosynthesis	Metabolism;Metabolism;Metabolism;Metabolism;Metabolism;Genetic Information Processing	Global and overview maps;Global and overview maps;Metabolism of other amino acids;Global and overview maps;Amino acid metabolism;Translation		Organic acids and derivatives	Carboxylic acids and derivatives	Amino acids, peptides, and analogues	M-H
metab_17037	477.019	0.674817	(5-ethenyl-2-hydroxyphenyl)oxidanesulfonic acid	HMDB0124978	(5-ethenyl-2-hydroxyphenyl)oxidanesulfonic acid	216.009	-	C8H8O5S	-	-	-	-	-	-	-	-		Organic acids and derivatives	Organic sulfuric acids and derivatives	Arylsulfates	2M+FA-H
metab_17054	231.098	0.686717	N-a-t-Boc-asparagine	-	-	-	-	C9H16N2O5	-	-	-	-	-	-	-	-		-	-	-	M-H
metab_17069	179.055	0.700533	Myo-Inositol	HMDB0000211	myo-Inositol	180.063	87-89-8	C6H12O6	C00137	myo-Inositol;D-myo-Inositol;1D-myo-Inositol;L-myo-Inositol;1L-myo-Inositol;meso-Inositol;Inositol;Dambose;Cyclohexitol;Meat sugar;Bios I	Carbohydrates	Monosaccharides	map01100;map01110;map00562;map02010;map00053;map00052;map04070	Metabolic pathways; Biosynthesis of secondary metabolites; Inositol phosphate metabolism; ABC transporters; Ascorbate and aldarate metabolism; Galactose metabolism; Phosphatidylinositol signaling system	Metabolism;Metabolism;Metabolism;Environmental Information Processing;Metabolism;Metabolism;Environmental Information Processing	Global and overview maps;Global and overview maps;Carbohydrate metabolism;Membrane transport;Carbohydrate metabolism;Carbohydrate metabolism;Signal transduction		Organic oxygen compounds	Organooxygen compounds	Alcohols and polyols	M-H
metab_17073	246.098	0.70735	D-1-[(3-Carboxypropyl)amino]-1-deoxyfructose	HMDB0038663	D-1-[(3-Carboxypropyl)amino]-1-deoxyfructose	265.116	10003-63-1	C10H19NO7	-	-	-	-	-	-	-	-		Organic acids and derivatives	Carboxylic acids and derivatives	Amino acids, peptides, and analogues	M-H2O-H
metab_17083	376.101	0.71815	Lactosamine	HMDB0006591	Lactosamine	341.132	13000-25-4	C12H23NO10	C00203	UDP-N-acetyl-D-galactosamine;UDP-N-acetyl-alpha-D-galactosamine	-	-	map01100;map00520	Metabolic pathways; Amino sugar and nucleotide sugar metabolism	Metabolism;Metabolism	Global and overview maps;Carbohydrate metabolism		Lipids and lipid-like molecules	Fatty Acyls	Fatty acyl glycosides	M+Cl
metab_17095	260.077	0.727033	Pisatoside	HMDB0039127	Pisatoside	261.085	18814-39-6	C10H15NO7	-	-	-	-	-	-	-	-		Organic oxygen compounds	Organooxygen compounds	Carbohydrates and carbohydrate conjugates	M-H
metab_17097	502.155	0.727033	Amygdalin	HMDB0035030	Amygdalin	457.158	29883-15-6	C20H27NO11	C08325	Amygdalin;(R)-Amygdalin;(R)-Amygdaloside;(R)-Laenitrile	-	-	map00460;map01100;map01110	Cyanoamino acid metabolism; Metabolic pathways; Biosynthesis of secondary metabolites	Metabolism;Metabolism;Metabolism	Metabolism of other amino acids;Global and overview maps;Global and overview maps		Organic oxygen compounds	Organooxygen compounds	Carbohydrates and carbohydrate conjugates	M+FA-H
metab_17103	326.091	0.733883	Acetaminophen glucuronide	HMDB0010316	Acetaminophen glucuronide	327.095	16110-10-4	C14H17NO8	-	-	-	-	-	-	-	-		Organic oxygen compounds	Organooxygen compounds	Carbohydrates and carbohydrate conjugates	M-H
metab_17104	410.13	0.733883	2-(acetylamino)-1,5-anhydro-2-deoxy-4-O-b-D-galactopyranosyl-D-arabino-Hex-1-enitol	HMDB0002282	2-(acetylamino)-1,5-anhydro-2-deoxy-4-O-b-D-galactopyranosyl-D-arabino-Hex-1-enitol	365.132	868264-13-5	C14H23NO10	-	-	-	-	-	-	-	-		Organic oxygen compounds	Organooxygen compounds	Carbohydrates and carbohydrate conjugates	M+FA-H
metab_17105	593.16	0.733883	2-{2,6-dihydroxy-4-[6-hydroxy-7-(3-methylbut-2-en-1-yl)-1-benzofuran-2-yl]phenyl}-6-(2,4-dihydroxyphenyl)-4-methylcyclohex-3-ene-1-carboxylic acid	HMDB0126148	2-{2,6-dihydroxy-4-[6-hydroxy-7-(3-methylbut-2-en-1-yl)-1-benzofuran-2-yl]phenyl}-6-(2,4-dihydroxyphenyl)-4-methylcyclohex-3-ene-1-carboxylic acid	556.21	-	C33H32O8	-	-	-	-	-	-	-	-		Phenylpropanoids and polyketides	2-arylbenzofuran flavonoids	Not Available	M+K-2H
metab_17126	343.124	0.749633	Lactitol	HMDB0040937	Lactitol	344.132	585-86-4	C12H24O11	-	-	-	-	-	-	-	-		Lipids and lipid-like molecules	Fatty Acyls	Fatty acyl glycosides	M-H
metab_17146	282.062	0.77015	Methyl 2,3-dihydro-3,5-dihydroxy-2-oxo-3-indoleacetic acid	HMDB0038942	Methyl 2,3-dihydro-3,5-dihydroxy-2-oxo-3-indoleacetic acid	237.064	57061-18-4	C11H11NO5	-	-	-	-	-	-	-	-		Organoheterocyclic compounds	Indoles and derivatives	Indolyl carboxylic acids and derivatives	M+FA-H
metab_17156	379.082	0.777033	5-hydroxy-3,6,7-trimethoxy-2-(4-methoxyphenyl)-4H-chromen-4-one	-	-	-	-	C19H18O7	-	-	-	-	-	-	-	-		-	-	-	M+Na-2H
metab_17163	845.278	0.78385	6H-Purin-6-one, 1,9-dihydro-9-(3-O-methylpentofuranosyl)-	-	-	-	-	C11H14N4O5	-	-	-	-	-	-	-	-		-	-	-	3M-H
metab_17225	304.034	0.993983	2',3' cyclic CMP	HMDB0011691	Cytidine 2',3'-cyclic phosphate	305.041	-	C9H12N3O7P	C00127	Glutathione disulfide;GSSG;Oxiglutatione;Oxidized glutathione	-	-	map01100;map00480	Metabolic pathways; Glutathione metabolism	Metabolism;Metabolism	Global and overview maps;Metabolism of other amino acids		Organic acids and derivatives	Carboxylic acids and derivatives	Amino acids, peptides, and analogues	M-H
metab_17269	167.034	1.14568	5-Methoxysalicylic acid	HMDB0001868	5-Methoxysalicylic acid	168.042	2612-02-04	C8H8O4	-	-	-	-	-	-	-	-		Benzenoids	Benzene and substituted derivatives	Benzoic acids and derivatives	M-H
metab_17288	122.024	1.21282	2-Hydroxy-4-imino-2,5-cyclohexadienone	HMDB0031713	2-Hydroxy-4-imino-2,5-cyclohexadienone	123.032	74331-93-4	C6H5NO2	-	-	-	-	-	-	-	-		Organic nitrogen compounds	Organonitrogen compounds	Quinonimines	M-H
metab_17356	242.078	1.69737	Cytidine	HMDB0000089	Cytidine	243.086	65-46-3	C9H13N3O5	C00475	Cytidine	Nucleic acids	Nucleosides	map00240;map01100;map02010	Pyrimidine metabolism; Metabolic pathways; ABC transporters	Metabolism;Metabolism;Environmental Information Processing	Nucleotide metabolism;Global and overview maps;Membrane transport		Nucleosides, nucleotides, and analogues	Pyrimidine nucleosides	Not Available	M-H
metab_17371	197.045	1.83907	Syringic acid	HMDB0002085	Syringic acid	198.053	530-57-4	C9H10O5	C10833	Syringic acid;Syringate;4-Hydroxy-3,5-dimethoxybenzoate;Gallic acid 3,5-dimethyl ether	-	-	-	-	-	-		Benzenoids	Benzene and substituted derivatives	Benzoic acids and derivatives	M-H
metab_17374	206.082	1.8983	N-Acetyl-D-phenylalanine	-	-	-	-	C11H13NO3	C05620	N-Acetyl-D-phenylalanine	-	-	map01100;map00360	Metabolic pathways; Phenylalanine metabolism	Metabolism;Metabolism	Global and overview maps;Amino acid metabolism		-	-	-	M-H
metab_17376	153.018	1.90878	Gentisic acid	HMDB0000152;HMDB0059999	Gentisic acid;Gentisuric acid	154.026608673;211.048072403	490-79-9	C7H6O4	C00628	2,5-Dihydroxybenzoate;2,5-Dihydroxybenzoic acid;Gentisic acid;Hydroquinonecarboxylic acid;Gentisate	-	-	map01100;map00350	Metabolic pathways; Tyrosine metabolism	Metabolism;Metabolism	Global and overview maps;Amino acid metabolism		Benzenoids	Benzene and substituted derivatives	Benzoic acids and derivatives	M-H
metab_17381	711.219	1.92753	Maltotetraose	HMDB0001296	Maltotetraose	666.222	34612-38-9	C24H42O21	C02052	Maltotetraose	-	-	-	-	-	-		Organic oxygen compounds	Organooxygen compounds	Carbohydrates and carbohydrate conjugates	M+FA-H
metab_17396	218.996	2.11397	2-[(sulfooxy)methyl]butanoic acid	HMDB0130847	2-[(sulfooxy)methyl]butanoic acid	198.02	-	C5H10O6S	-	-	-	-	-	-	-	-		Lipids and lipid-like molecules	Fatty Acyls	Fatty acids and conjugates	M+Na-2H
metab_17411	180.066	2.29905	L-Tyrosine	HMDB0000158	L-Tyrosine	181.074	60-18-4	C9H11NO3	C00082	L-Tyrosine;(S)-3-(p-Hydroxyphenyl)alanine;(S)-2-Amino-3-(p-hydroxyphenyl)propionic acid;Tyrosine	Peptides	Amino acids	map01100;map01110;map00350;map00730;map00965;map00130;map00998;map01230;map00966;map00950;map01210;map00940;map00360;map00970;map00261;map00400;map00460	Metabolic pathways; Biosynthesis of secondary metabolites; Tyrosine metabolism; Thiamine metabolism; Betalain biosynthesis; Ubiquinone and other terpenoid-quinone biosynthesis; Biosynthesis of various secondary metabolites - part 2; Biosynthesis of amino acids; Glucosinolate biosynthesis; Isoquinoline alkaloid biosynthesis; 2-Oxocarboxylic acid metabolism; Phenylpropanoid biosynthesis; Phenylalan…	Metabolism;Metabolism;Metabolism;Metabolism;Metabolism;Metabolism;Metabolism;Metabolism;Metabolism;Metabolism;Metabolism;Metabolism;Metabolism;Genetic Information Processing;Metabolism;Metabolism;Metabolism	Global and overview maps;Global and overview maps;Amino acid metabolism;Metabolism of cofactors and vitamins;Biosynthesis of other secondary metabolites;Metabolism of cofactors and vitamins;Biosynthesis of other secondary metabolites;Global and overview maps;Biosynthesis of other secondary metabolites;Biosynthesis of other secondary metabolites;Global and overview maps;Biosynthesis of other secon…		Organic acids and derivatives	Carboxylic acids and derivatives	Amino acids, peptides, and analogues	M-H
metab_17422	199.097	2.36875	3-Hydroxysebacic acid	HMDB0000350	3-Hydroxysebacic acid	218.115	446881-43-2	C10H18O5	-	-	-	-	-	-	-	-		Organic acids and derivatives	Hydroxy acids and derivatives	Medium-chain hydroxy acids and derivatives	M-H2O-H
metab_17447	309.061	2.49042	4-hydroxy-3-[(4-hydroxy-6-methyl-2-oxopyran-3-yl)methyl]-6-methylpyran-2-one	-	-	-	-	C13H12O6	-	-	-	-	-	-	-	-		-	-	-	M+FA-H
metab_17471	818.262	2.64998	1,4-b-D-Mannan	HMDB0006798	1,4-b-D-Mannan	1638.54	-	C60H102O51	C02492	1,4-beta-D-Mannan	-	-	map01100;map00051	Metabolic pathways; Fructose and mannose metabolism	Metabolism;Metabolism	Global and overview maps;Carbohydrate metabolism		Organic oxygen compounds	Organooxygen compounds	Carbohydrates and carbohydrate conjugates	M-2H
metab_17477	899.289	2.67578	Maltoundecaose	HMDB0059958	Maltoundecaose	1800.59	-	C66H112O56	-	-	-	-	-	-	-	-		Organic Polymers	Polysaccharides	Not Available	M-2H
metab_17492	187.097	2.74958	4-Butyl-gamma-butyrolactone	HMDB0035422	4-Butyl-gamma-butyrolactone	142.099	104-50-7	C8H14O2	-	-	-	-	-	-	-	-		Organoheterocyclic compounds	Lactones	Gamma butyrolactones	M+FA-H
metab_17503	244.13	2.81358	Leu-Gly-Gly	-	-	-	-	C10H19N3O4	-	-	-	-	-	-	-	-		-	-	-	M-H
metab_17504	227.103	2.85213	Proline-hydroxyproline	HMDB0006695	Prolylhydroxyproline	228.111	18684-24-7	C10H16N2O4	-	-	-	-	-	-	-	-		Organic acids and derivatives	Carboxylic acids and derivatives	Amino acids, peptides, and analogues	M-H
metab_17509	211.061	2.89167	Mandelic Acid, Methyl Ester	-	-	-	-	C9H10O3	-	-	-	-	-	-	-	-		-	-	-	M+FA-H
metab_17523	133.029	2.94342	Mandelic acid	HMDB0124926;HMDB0000703	2-hydroxy-2-phenylacetic acid;Mandelic acid	152.047344118;152.047344122	90-64-2	C8H8O3	C01984	(S)-Mandelate;(S)-2-Hydroxy-2-phenylacetic acid;(S)-2-Hydroxy-2-phenylacetate;(S)-Mandelic acid	-	-	-	-	-	-		Benzenoids	Benzene and substituted derivatives	Not Available	M-H2O-H
metab_17531	187.108	2.98003	Glycyl-L-leucine	HMDB0000759;HMDB0028929;MJDBOTE0000578	Glycylleucine;Leucyl-Glycine	188.116092388;188.116092388	869-19-2	C8H16N2O3	C02155	Glycyl-leucine;Glycyl-L-leucine	-	-	-	-	-	-		Organic acids and derivatives	Carboxylic acids and derivatives	Amino acids, peptides, and analogues	M-H
metab_17545	331.067	3.026	Galloyl glucose	-	-	-	-	C13H16O10	-	-	-	-	-	-	-	-		-	-	-	M-H
metab_17550	211.024	3.04063	5-Dehydroquinic acid	HMDB0012710	3-Dehydroquinic acid	190.048	-	C7H10O6	C00944	3-Dehydroquinate;3-Dehydroquinic acid;5-Dehydroquinate;5-Dehydroquinic acid	-	-	map01100;map00400;map01110;map01230	Metabolic pathways; Phenylalanine, tyrosine and tryptophan biosynthesis; Biosynthesis of secondary metabolites; Biosynthesis of amino acids	Metabolism;Metabolism;Metabolism;Metabolism	Global and overview maps;Amino acid metabolism;Global and overview maps;Global and overview maps		Organic acids and derivatives	Hydroxy acids and derivatives	Alpha hydroxy acids and derivatives	M+Na-2H
metab_17557	333.097	3.0702	Methyl 4-(6,8-dihydroxy-3-methyl-1-oxoisochromen-7-yl)-2,4-dimethoxybutanoate	-	-	-	-	C17H20O8	-	-	-	-	-	-	-	-		-	-	-	M-H2O-H
metab_17582	94.0288	3.18705	1-Pyrroline-5-carboxylic acid	HMDB0001301	1-Pyrroline-5-carboxylic acid	113.048	2906-39-0	C5H7NO2	C04322	Delta1-Pyrroline-5-carboxylate;3,4-Dihydro-2H-Pyrrole-2-carboxylate	-	-	-	-	-	-		Organic acids and derivatives	Carboxylic acids and derivatives	Amino acids, peptides, and analogues	M-H2O-H
metab_17584	299.077	3.19035	P-Hydroxybenzoic acid-O-glucoside	-	-	-	-	C13H16O8	-	-	-	-	-	-	-	-		-	-	-	M-H
metab_17585	258.146	3.19362	Lysyl-Hydroxyproline	HMDB0028952	Lysylhydroxyproline	259.153	-	C11H21N3O4	-	-	-	-	-	-	-	-		Organic acids and derivatives	Carboxylic acids and derivatives	Amino acids, peptides, and analogues	M-H
metab_17616	281.139	3.33463	Artemisinin	;MJDBOTE0001374			-	C15H22O5	C09538	Qing Hau Sau;Artemisinin	-	-	-	-	-	-		-	-	-	M-H
metab_17628	203.001	3.4113	Benzenesulfonic acid	-	-	-	-	C6H6O3S	-	-	-	-	-	-	-	-		-	-	-	M+FA-H
metab_17635	136.076	3.44965	Tyramine	HMDB0000306	Tyramine	137.084	51-67-2	C8H11NO	C00483	Tyramine;2-(p-Hydroxyphenyl)ethylamine	Peptides	Amines	map01100;map00950;map01110;map00350	Metabolic pathways; Isoquinoline alkaloid biosynthesis; Biosynthesis of secondary metabolites; Tyrosine metabolism	Metabolism;Metabolism;Metabolism;Metabolism	Global and overview maps;Biosynthesis of other secondary metabolites;Global and overview maps;Amino acid metabolism		Benzenoids	Benzene and substituted derivatives	Phenethylamines	M-H
metab_17647	124.039	3.5354	6-Oxopiperidine-2-carboxylic acid	HMDB0061705	6-Oxopiperidine-2-carboxylic acid	143.058	-	C6H9NO3	-	-	-	-	-	-	-	-		Organic acids and derivatives	Carboxylic acids and derivatives	Amino acids, peptides, and analogues	M-H2O-H
metab_17670	365.135	3.66252	Picrocrocin	HMDB0005796	Picrocrocin	330.168	138-55-6	C16H26O7	C17055	Picrocrocin	-	-	-	-	-	-		Organic oxygen compounds	Organooxygen compounds	Carbohydrates and carbohydrate conjugates	M+Cl
metab_17680	181.05	3.7082	3-Methoxy-4-hydroxyphenylacetate	HMDB0000118	Homovanillic acid	182.058	-	C9H10O4	C05582	Homovanillate;Homovanillic acid;3-Methoxy-4-hydroxyphenylacetate	-	-	map01100;map00350	Metabolic pathways; Tyrosine metabolism	Metabolism;Metabolism	Global and overview maps;Amino acid metabolism		Benzenoids	Phenols	Methoxyphenols	M-H
metab_17688	241.108	3.74185	2,6-Dimethoxy-4-propylphenol	HMDB0036226	2,6-Dimethoxy-4-propylphenol	196.11	6766-82-1	C11H16O3	-	-	-	-	-	-	-	-		Benzenoids	Phenols	Methoxyphenols	M+FA-H
metab_17689	503.14	3.74185	6-Caffeoylsucrose	HMDB0035486	6-Caffeoylsucrose	504.148	-	C21H28O14	-	-	-	-	-	-	-	-		Lipids and lipid-like molecules	Steroids and steroid derivatives	Steroidal glycosides	M-H
metab_17704	201.124	3.79425	L-Leucyl-L- Alanine	-	-	-	-	C9H18N2O3	-	-	-	-	-	-	-	-		-	-	-	M-H
metab_17715	175.087	3.8368	3-(2-aminoethyl)-1H-indol-5-ol	HMDB0000259;MJDBWX000002341	Serotonin	176.095	50-67-9	C10H12N2O	C00780	Serotonin;3-(2-Aminoethyl)-1H-indol-5-ol;5-Hydroxytryptamine;Enteramine	Peptides;Hormones and transmitters	Amines;Neurotransmitters	map01100;map00380	Metabolic pathways; Tryptophan metabolism	Metabolism;Metabolism	Global and overview maps;Amino acid metabolism		Organoheterocyclic compounds	Indoles and derivatives	Tryptamines and derivatives	M-H
metab_17719	276.018	3.85318	DOPA sulfate	HMDB0002028	DOPA sulfate	277.026	96253-55-3	C9H11NO7S	-	-	-	-	-	-	-	-		Organic acids and derivatives	Carboxylic acids and derivatives	Amino acids, peptides, and analogues	M-H
metab_17720	278.103	3.85978	(3,4,5-trihydroxy-6-methyloxan-2-yl) 2-(methylamino)benzoate	-	-	-	-	C14H19NO6	-	-	-	-	-	-	-	-		-	-	-	M-H2O-H
metab_17743	153.055	3.96095	5,6-dihydropenicillic acid	-	-	-	-	C8H12O4	-	-	-	-	-	-	-	-		-	-	-	M-H2O-H
metab_17755	211.006	4.03053	[(1-oxo-3-phenylpropan-2-yl)oxy]sulfonic acid	HMDB0135295	[(1-oxo-3-phenylpropan-2-yl)oxy]sulfonic acid	230.025	-	C9H10O5S	-	-	-	-	-	-	-	-		Benzenoids	Benzene and substituted derivatives	Not Available	M-H2O-H
metab_17766	241.119	4.07835	Gamma-Glutamylleucine	HMDB0011171	gamma-Glutamylleucine	260.137	2566-39-4	C11H20N2O5	-	-	-	-	-	-	-	-		Organic acids and derivatives	Carboxylic acids and derivatives	Amino acids, peptides, and analogues	M-H2O-H
metab_17770	225.04	4.10102	Acetylsalicylic acid	HMDB0001879;HMDB0015585	Aspirin;Chlophedianol	180.042258744;289.123341974	-	C9H8O4	C01405	Aspirin;Acetylsalicylic acid;2-Acetoxybenzenecarboxylic acid;Acetylsalicylate	-	-	-	-	-	-		Benzenoids	Benzene and substituted derivatives	Benzoic acids and derivatives	M+FA-H
metab_17791	217.017	4.15197	4-Toluenesulfonic acid	HMDB0059933	p-Toluenesulfonic acid	172.019	-	C7H8O3S	C06677	Toluene-4-sulfonate;Tosylate	-	-	map01100	Metabolic pathways	Metabolism	Global and overview maps		Benzenoids	Benzene and substituted derivatives	Benzenesulfonic acids and derivatives	M+FA-H
metab_17809	245.082	4.21318	Columbianetin	-	-	-	-	C14H14O4	-	-	-	-	-	-	-	-		-	-	-	M-H
metab_17810	389.145	4.21318	Loganin	LMPR0102070001			-	C17H26O10	C01433	Loganin	-	-	map01100;map01110;map00902	Metabolic pathways; Biosynthesis of secondary metabolites; Monoterpenoid biosynthesis	Metabolism;Metabolism;Metabolism	Global and overview maps;Global and overview maps;Metabolism of terpenoids and polyketides		-	-	-	M-H
metab_17829	211.061	4.29617	Paeonol	-	-	-	-	C9H10O3	C10712	Paeonol	-	-	-	-	-	-		-	-	-	M+FA-H
metab_17853	145.086	4.39495	2-Hexanone	HMDB0005842;MJDBOTE0000737	2-Oxohexane	100.089	-	C6H12O	-	-	-	-	-	-	-	-		Organic oxygen compounds	Organooxygen compounds	Carbonyl compounds	M+FA-H
metab_17899	279.135	4.56092	Valyl-Tyrosine	HMDB0029139	Valyltyrosine	280.142	-	C14H20N2O4	-	-	-	-	-	-	-	-		Organic acids and derivatives	Carboxylic acids and derivatives	Amino acids, peptides, and analogues	M-H
metab_17900	166.026	4.56407	N-Acetyl-DL-alanine	-	-	-	-	C5H9NO3	-	-	-	-	-	-	-	-		-	-	-	M+Cl
metab_17902	293.066	4.57372	Arbutin	HMDB0029943	Arbutin	272.09	497-76-7	C12H16O7	C06186	Arbutin;Ursin;Uvasol;Hydroquinone-O-beta-D-glucopyranoside	-	-	map00010	Glycolysis / Gluconeogenesis	Metabolism	Carbohydrate metabolism		Organic oxygen compounds	Organooxygen compounds	Carbohydrates and carbohydrate conjugates	M+Na-2H
metab_17912	235.072	4.6485	2-[(1S)-1-hydroxyethyl]-1H-quinazolin-4-one	-	-	-	-	C10H10N2O2	-	-	-	-	-	-	-	-		-	-	-	M+FA-H
metab_17941	183.004	4.80978	2,4-DINITROPHENOL	-	-	-	-	C6H4N2O5	C02496	2,4-Dinitrophenol	-	-	-	-	-	-		-	-	-	M-H
metab_17944	265.108	4.8261	(5E)-3,4,9-trihydroxy-2-propyl-2,3,4,7,8,9-hexahydrooxecin-10-one	-	-	-	-	C12H20O5	-	-	-	-	-	-	-	-		-	-	-	M+Na-2H
metab_17945	225.076	4.83047	Propylparaben	HMDB0032574;MJDBOTE0000507	Propylparaben	180.079	94-13-3	C10H12O3	-	-	-	-	-	-	-	-		Benzenoids	Benzene and substituted derivatives	Benzoic acids and derivatives	M+FA-H
metab_17953	245.012	4.87263	3-[3-(Sulfooxy)phenyl]propanoic acid	HMDB0094710	3-[3-(Sulfooxy)phenyl]propanoic acid	246.02	-	C9H10O6S	-	-	-	-	-	-	-	-		Organic acids and derivatives	Organic sulfuric acids and derivatives	Arylsulfates	M-H
metab_17978	227.128	4.95847	9-methoxycarbonyldec-9-enoic acid	-	-	-	-	C12H20O4	-	-	-	-	-	-	-	-		-	-	-	M-H
metab_17980	245.093	4.96198	MJAW00531	;MJAW00531			-	C13H14N2O3	-	-	-	-	-	-	-	-		-	-	-	M-H
metab_17985	215.082	4.9815	L-1,2,3,4-Tetrahydro-beta-carboline-3-carboxylic acid	HMDB0035665	L-1,2,3,4-Tetrahydro-beta-carboline-3-carboxylic acid	216.09	42438-90-4	C12H12N2O2	-	-	-	-	-	-	-	-		Organoheterocyclic compounds	Indoles and derivatives	Pyridoindoles	M-H
metab_18015	385.114	5.133	3,4,5-trihydroxy-6-[1-(3-phenyloxiran-2-yl)ethoxy]oxane-2-carboxylic acid	HMDB0133742	3,4,5-trihydroxy-6-[1-(3-phenyloxiran-2-yl)ethoxy]oxane-2-carboxylic acid	340.116	-	C16H20O8	-	-	-	-	-	-	-	-		Organic oxygen compounds	Organooxygen compounds	Carbohydrates and carbohydrate conjugates	M+FA-H
metab_18016	173.045	5.13998	Shikimic acid	HMDB0003070	Shikimic acid	174.053	138-59-0	C7H10O5	C00493	Shikimate;Shikimic acid;3,4,5-Trihydroxy-1-cyclohexenecarboxylic acid	-	-	map01100;map00400;map01110;map01230	Metabolic pathways; Phenylalanine, tyrosine and tryptophan biosynthesis; Biosynthesis of secondary metabolites; Biosynthesis of amino acids	Metabolism;Metabolism;Metabolism;Metabolism	Global and overview maps;Amino acid metabolism;Global and overview maps;Global and overview maps		Organic oxygen compounds	Organooxygen compounds	Alcohols and polyols	M-H
metab_18018	308.114	5.14342	3-(4-hydroxy-3-methoxyphenyl)-N-(4-oxobutyl)prop-2-enimidic acid	HMDB0139920	3-(4-hydroxy-3-methoxyphenyl)-N-(4-oxobutyl)prop-2-enimidic acid	263.116	-	C14H17NO4	-	-	-	-	-	-	-	-		Phenylpropanoids and polyketides	Cinnamic acids and derivatives	Hydroxycinnamic acids and derivatives	M+FA-H
metab_18025	310.129	5.17595	(2S)-2-(N-(2-methoxyacetyl)-2,6-dimethylanilino)propanoic acid	-	-	-	-	C14H19NO4	-	-	-	-	-	-	-	-		-	-	-	M+FA-H
metab_18039	317.197	5.21567	7(14)-Bisabolene-2,3,10,11-tetrol	HMDB0035918	7(14)-Bisabolene-2,3,10,11-tetrol	272.199	122470-42-2	C15H28O4	-	-	-	-	-	-	-	-		Lipids and lipid-like molecules	Prenol lipids	Sesquiterpenoids	M+FA-H
metab_18052	324.108	5.27722	Aspartyl-Arginine	HMDB0028747	Aspartyl-Arginine	289.139	-	C10H19N5O5	-	-	-	-	-	-	-	-		Organic acids and derivatives	Carboxylic acids and derivatives	Amino acids, peptides, and analogues	M+Cl
metab_18058	319.118	5.3099	Pseudo-Anisatin	-	-	-	-	C15H22O6	-	-	-	-	-	-	-	-		-	-	-	M+Na-2H
metab_18083	301.108	5.43675	MUCRONULATOL((卤))	-	-	-	-	C17H18O5	-	-	-	-	-	-	-	-		-	-	-	M-H
metab_18101	261.134	5.50237	9-(2,3-dihydroxypropoxy)-9-oxononanoic acid	-	-	-	-	C12H22O6	-	-	-	-	-	-	-	-		-	-	-	M-H
metab_18131	291.145	5.6324	3-Hydroxydodecanedioic acid	HMDB0000413	3-Hydroxydodecanedioic acid	246.147	34574-69-1	C12H22O5	-	-	-	-	-	-	-	-		Organic acids and derivatives	Hydroxy acids and derivatives	Medium-chain hydroxy acids and derivatives	M+FA-H
metab_18143	461.072	5.67513	Myricetin-3-O-galactoside	-	-	-	-	C21H20O13	-	-	-	-	-	-	-	-		-	-	-	M-H2O-H
metab_18148	401.108	5.70502	Gentiopicroside	-	-	-	-	C16H20O9	C09782	Gentiopicrin;Gentiopicroside	-	-	map01110	Biosynthesis of secondary metabolites	Metabolism	Global and overview maps		-	-	-	M+FA-H
metab_18152	221.045	5.73855	Herniarin	HMDB0029758	Herniarin	176.047	531-59-9	C10H8O3	C09268	Herniarin;7-Methoxycoumarin	-	-	-	-	-	-		Phenylpropanoids and polyketides	Coumarins and derivatives	Not Available	M+FA-H
metab_18158	317.103	5.75213	Angolensin	LMPK12160054;HMDB0141947	1-(2,4-dihydroxyphenyl)-2-(4-methoxyphenyl)propan-1-one	272.105	-	C16H16O4	-	-	-	-	-	-	-	-		Phenylpropanoids and polyketides	Alpha-methyldeoxybenzoin flavonoids	Not Available	M+FA-H
metab_18171	449.239	5.82315	R-2-Hydroxy-3-methylbutanoic acid 3-Methylbutanoyl	LMFA07011009;HMDB0031510	R-2-Hydroxy-3-methylbutanoic acid 3-Methylbutanoyl	202.121	-	C10H18O4	-	-	-	-	-	-	-	-		Lipids and lipid-like molecules	Fatty Acyls	Fatty acid esters	2M+FA-H
metab_18179	465.197	5.85395	Serylglutamine	HMDB0029037	Serylglutamine	233.101	94421-66-6	C8H15N3O5	-	-	-	-	-	-	-	-		Organic acids and derivatives	Carboxylic acids and derivatives	Amino acids, peptides, and analogues	2M-H
metab_18187	627.229	5.87702	7-hydroxy-2-(4-hydroxyphenyl)-5-methoxy-6,8-dimethyl-3,4-dihydro-2H-1-benzopyran-4-one	HMDB0130641	7-hydroxy-2-(4-hydroxyphenyl)-5-methoxy-6,8-dimethyl-3,4-dihydro-2H-1-benzopyran-4-one	314.115	-	C18H18O5	-	-	-	-	-	-	-	-		Phenylpropanoids and polyketides	Flavonoids	O-methylated flavonoids	2M-H
metab_18227	143.07	5.9986	Trans-4-Hydroxycyclohexanecarboxylic Acid	;MJDBOTE0000582			-	C7H12O3	-	-	-	-	-	-	-	-		-	-	-	M-H
metab_18236	379.161	6.0185	3-Methyl-3-butenyl apiosyl-(1->6)-glucoside	HMDB0031954	3-Methyl-3-butenyl apiosyl-(1|right|6)-glucoside	380.168	198832-72-3	C16H28O10	-	-	-	-	-	-	-	-		Lipids and lipid-like molecules	Fatty Acyls	Fatty acyl glycosides	M-H
metab_18248	341.102	6.0413	6-Ethoxy-3(4'-hydroxyphenyl)-4-methylcoumarin	-	-	-	-	C18H16O4	-	-	-	-	-	-	-	-		-	-	-	M+FA-H
metab_18255	183.102	6.05117	Sebacic acid	HMDB0000792;LMFA01170006	Sebacic acid	202.121	111-20-6	C10H18O4	C08277	Sebacic acid;Decanedioic acid	-	-	-	-	-	-		Lipids and lipid-like molecules	Fatty Acyls	Fatty acids and conjugates	M-H2O-H
metab_18292	249.076	6.11222	3-(2,4-dimethyl-6-oxo-3H-pyran-2-yl)-2-hydroxy-2-methylpropanoic acid	-	-	-	-	C11H16O5	-	-	-	-	-	-	-	-		-	-	-	M+Na-2H
metab_18309	149.06	6.13525	MJAW00273	;MJAW00273			-	C9H10O2	-	-	-	-	-	-	-	-		-	-	-	M-H
metab_18323	364.997	6.15193	Luteolin 4'-sulfate	LMPK12110736;HMDB0038471	Luteolin 4'-sulfate	366.005	60889-07-8	C15H10O9S	-	-	-	-	-	-	-	-		Phenylpropanoids and polyketides	Flavonoids	Flavones	M-H
metab_18333	171.102	6.1655	9-Oxo-nonanoic acid	LMFA01060160;HMDB0094711	9-Oxo-nonanoic acid	172.11	-	C9H16O3	C16322	9-Oxononanoic acid	-	-	map00592;map01110	alpha-Linolenic acid metabolism; Biosynthesis of secondary metabolites	Metabolism;Metabolism	Lipid metabolism;Global and overview maps		Lipids and lipid-like molecules	Fatty Acyls	Fatty acids and conjugates	M-H
metab_18339	505.171	6.17215	Ligstroside	HMDB0034751	Ligustroside	524.189	35897-92-8	C25H32O12	-	-	-	-	-	-	-	-		Organic oxygen compounds	Organooxygen compounds	Carbohydrates and carbohydrate conjugates	M-H2O-H
metab_18364	417.213	6.19972	Blumenol C glucoside	HMDB0040668	Blumenol C glucoside	372.215	62512-23-6	C19H32O7	-	-	-	-	-	-	-	-		Lipids and lipid-like molecules	Fatty Acyls	Fatty acyl glycosides	M+FA-H
metab_18372	147.044	6.21068	P-Coumaraldehyde	HMDB0040986	p-Coumaraldehyde	148.052	20711-53-9	C9H8O2	C05608	4-Hydroxycinnamyl aldehyde;p-Coumaraldehyde	-	-	map01100;map00940;map01110	Metabolic pathways; Phenylpropanoid biosynthesis; Biosynthesis of secondary metabolites	Metabolism;Metabolism;Metabolism	Global and overview maps;Biosynthesis of other secondary metabolites;Global and overview maps		Phenylpropanoids and polyketides	Cinnamaldehydes	Not Available	M-H
metab_18398	107.049	6.2241	O-Cresol	HMDB0002055	o-Cresol	108.058	95-48-7	C7H8O	C01542	o-Cresol;2-Hydroxytoluene;o-Methylphenol	-	-	map01100	Metabolic pathways	Metabolism	Global and overview maps		Benzenoids	Phenols	Cresols	M-H
metab_18408	257.045	6.23253	Norlichexanthone	-	-	-	-	C14H10O5	C10087	Norlichexanthone;1,3,6-Trihydroxy-8-methyl-9H-xanthen-9-one	-	-	-	-	-	-		-	-	-	M-H
metab_18416	685.271	6.23593	Secoisolariciresinol diglucoside	HMDB0036323	Secoisolariciresinol 9,9'-diglucoside	686.279	-	C32H46O16	-	-	-	-	-	-	-	-		Lignans, neolignans and related compounds	Lignan glycosides	Not Available	M-H
metab_18426	151.039	6.24912	Vanillin	HMDB0012308	Vanillin	152.047	121-33-5	C8H8O3	C00755	4-Hydroxy-3-methoxy-benzaldehyde;Vanillin;Vanillaldehyde;4-Hydroxy-3-methoxybenzaldehyde	-	-	map01100;map01110;map00998	Metabolic pathways; Biosynthesis of secondary metabolites; Biosynthesis of various secondary metabolites - part 2	Metabolism;Metabolism;Metabolism	Global and overview maps;Global and overview maps;Biosynthesis of other secondary metabolites		Benzenoids	Phenols	Methoxyphenols	M-H
metab_18433	431.098	6.24912	Kaempferol-3-O-rhamnoside	-	-	-	-	C21H20O10	-	-	-	-	-	-	-	-		-	-	-	M-H
metab_18461	443.062	6.26643	Mangiferin	HMDB0034410	Mangiferin	422.085	4773-96-0	C19H18O11	C10077	Mangiferin;Chinomin	-	-	-	-	-	-		Organoheterocyclic compounds	Benzopyrans	1-benzopyrans	M+Na-2H
metab_18498	315.124	6.29722	Combretastatin A4	;MJDBOTE0001615			-	C18H20O5	C20268	Combretastatin A-4;Combretastatin A4	-	-	-	-	-	-		-	-	-	M-H
metab_18502	207.066	6.30193	Sinapyl aldehyde	-	-	-	-	C11H12O4	-	-	-	-	-	-	-	-		-	-	-	M-H
metab_18518	455.228	6.30792	13-oxo-7-[3,4,5-trihydroxy-6-(methoxymethyl)oxan-2-yl]oxytetradecanoic acid	-	-	-	-	C21H38O9	-	-	-	-	-	-	-	-		-	-	-	M+Na-2H
metab_18522	221.081	6.31477	(7R,8R)-7,8-dihydroxy-3,5,7-trimethyl-8H-isochromen-6-one	-	-	-	-	C12H14O4	-	-	-	-	-	-	-	-		-	-	-	M-H
metab_18555	215.082	6.33448	Laccarin	HMDB0041440	Laccarin	194.106	175669-28-0	C10H14N2O2	-	-	-	-	-	-	-	-		Organoheterocyclic compounds	Pyrrolopyridines	Not Available	M+Na-2H
metab_18557	318.062	6.33448	1-Methyladenosine	HMDB0003331	1-Methyladenosine	281.112	15763-06-1	C11H15N5O4	C02494	1-Methyladenosine	-	-	-	-	-	-		Nucleosides, nucleotides, and analogues	Purine nucleosides	Not Available	M+K-2H
metab_18565	259.097	6.33968	8-(2,3-dihydroxy-3-methylbutyl)-7-methoxychromen-2-one	-	-	-	-	C15H18O5	-	-	-	-	-	-	-	-		-	-	-	M-H2O-H
metab_18579	204.946	6.34395	3,5-dichlorosalicylic acid	-	-	-	-	C7H4Cl2O3	-	-	-	-	-	-	-	-		-	-	-	M-H
metab_18594	365.033	6.3501	L-Homocysteic acid	HMDB0002205	L-Homocysteic acid	183.02	14857-77-3	C4H9NO5S	C16511	L-Homocysteic acid;(2S)-2-Amino-4-sulfobutanoic acid	-	-	-	-	-	-		Organic acids and derivatives	Carboxylic acids and derivatives	Amino acids, peptides, and analogues	2M-H
metab_18597	583.238	6.3501	Lymecycline	HMDB0014401	Lymecycline	602.259	992-21-2	C29H38N4O10	-	-	-	-	-	-	-	-		Phenylpropanoids and polyketides	Tetracyclines	Not Available	M-H2O-H
metab_18599	753.312	6.3501	Phomopsin B	HMDB0038884	Phomopsin B	754.317	64925-81-1	C36H46N6O12	-	-	-	-	-	-	-	-		Organic acids and derivatives	Carboxylic acids and derivatives	Amino acids, peptides, and analogues	M-H
metab_18614	347.243	6.36165	Caproic acid	LMFA01010006;HMDB0000535	Caproic acid	116.084	142-62-1	C6H12O2	C01585	Hexanoic acid;Hexanoate;Hexylic acid;n-Caproic acid	Organic acids;Lipids	Carboxylic acids;Fatty acids	-	-	-	-		Lipids and lipid-like molecules	Fatty Acyls	Fatty acids and conjugates	3M-H
metab_18619	885.448	6.36165	PGP(18:3(6Z,9Z,12Z)/18:1(11Z))	HMDB0013565	PGP(18:3(6Z,9Z,12Z)/18:1(11Z))	850.476	-	C42H76O13P2	-	-	-	-	-	-	-	-		Lipids and lipid-like molecules	Glycerophospholipids	Glycerophosphoglycerophosphates	M+Cl
metab_18625	373.139	6.36688	6-[hydroxy(phenyl)methyl]-1-(3-methylbutanoyl)-4-oxopyridine-3-carboxamide	-	-	-	-	C18H20N2O4	-	-	-	-	-	-	-	-		-	-	-	M+FA-H
metab_18638	397.096	6.37037	Zearalenone 4-sulfate	HMDB0033623	Zearalenone 4-sulfate	398.104	132505-04-5	C18H22O8S	-	-	-	-	-	-	-	-		Phenylpropanoids and polyketides	Macrolides and analogues	Zearalenones	M-H
metab_18647	887.464	6.37675	PGP(18:2(9Z,12Z)/18:1(11Z))	HMDB0013550	PGP(18:2(9Z,12Z)/18:1(11Z))	852.492	-	C42H78O13P2	-	-	-	-	-	-	-	-		Lipids and lipid-like molecules	Glycerophospholipids	Glycerophosphoglycerophosphates	M+Cl
metab_18679	335.052	6.3996	Picein	-	-	-	-	C14H18O7	C10720	Picein	-	-	-	-	-	-		-	-	-	M+K-2H
metab_18698	371.113	6.41418	1-[2-(1,3-benzodioxol-5-yl)-3-methyl-1-benzofuran-5-yl]propane-1,2-diol	-	-	-	-	C19H18O5	-	-	-	-	-	-	-	-		-	-	-	M+FA-H
metab_18744	221.154	6.44435	Lauric Acid	HMDB0000638;LMFA01010012;MJDBOTE0000368	Dodecanoic acid	200.178	143-07-7	C12H24O2	C02679	Dodecanoic acid;Dodecanoate;Dodecylcarboxylate;Lauric acid	Lipids	Fatty acids	map01100;map01110;map00061	Metabolic pathways; Biosynthesis of secondary metabolites; Fatty acid biosynthesis	Metabolism;Metabolism;Metabolism	Global and overview maps;Global and overview maps;Lipid metabolism		Lipids and lipid-like molecules	Fatty Acyls	Fatty acids and conjugates	M+Na-2H
metab_18747	295.191	6.44435	(2E,4E,8E)-7,13-dihydroxy-4,8,12-trimethyltetradeca-2,4,8-trienoic acid	-	-	-	-	C17H28O4	-	-	-	-	-	-	-	-		-	-	-	M-H
metab_18760	387.145	6.45072	14,15-Dehydro-16-epi-vincamine	-	-	-	-	C21H24N2O3	-	-	-	-	-	-	-	-		-	-	-	M+Cl
metab_18794	511.275	6.46642	Proscillaridin	-	-	-	-	C30H42O8	C12816	Proscillaridin	Steroids	24-Carbon atoms	-	-	-	-		-	-	-	M-H2O-H
metab_18798	193.086	6.4723	Butylparaben	HMDB0032575;MJDBOTE0000349	Butylparaben	194.094	94-26-8	C11H14O3	-	-	-	-	-	-	-	-		Benzenoids	Benzene and substituted derivatives	Benzoic acids and derivatives	M-H
metab_18801	306.207	6.4723	Dihydrocapsaicin	LMFA08020318;HMDB0038457;MJDBOTE0001228	Dihydrocapsaicin	307.215	19408-84-5	C18H29NO3	C16952	Dihydrocapsaicin	-	-	-	-	-	-		Benzenoids	Phenols	Methoxyphenols	M-H
metab_18803	413.218	6.4723	(4R,5S,7R,11x)-11,12-Dihydroxy-1(10)-spirovetiven-2-one 12-glucoside	HMDB0030895	(4R,5S,7R,11x)-11,12-Dihydroxy-1(10)-spirovetiven-2-one 12-glucoside	414.225	62574-29-2	C21H34O8	-	-	-	-	-	-	-	-		Lipids and lipid-like molecules	Prenol lipids	Terpene glycosides	M-H
metab_18816	255.03	6.48118	Purpurin	LMPK12140007			-	C14H8O5	C10395	Purpurin	-	-	-	-	-	-		-	-	-	M-H
metab_18817	323.222	6.48118	Gamma-Linolenic acid	LMFA01030141;HMDB0003073;MJDBOTE0001062	gamma-Linolenic acid	278.225	506-26-3	C18H30O2	C06426	(6Z,9Z,12Z)-Octadecatrienoic acid;6,9,12-Octadecatrienoic acid;gamma-Linolenic acid;Gamolenic acid	Lipids	Fatty acids	map01100;map00591;map01040	Metabolic pathways; Linoleic acid metabolism; Biosynthesis of unsaturated fatty acids	Metabolism;Metabolism;Metabolism	Global and overview maps;Lipid metabolism;Lipid metabolism		Lipids and lipid-like molecules	Fatty Acyls	Lineolic acids and derivatives	M+FA-H
metab_18835	519.166	6.49818	Biopterin	HMDB0000633;HMDB0000817;HMDB0000468	D-Biopterin;Orinapterin;Biopterin	237.086189243;237.086189243;237.086189243	22150-76-1	C9H11N5O3	C06313	Biopterin;2-Amino-6-(1,2-dihydroxypropyl)-4(1H)-pteridinone	-	-	-	-	-	-		Organoheterocyclic compounds	Pteridines and derivatives	Pterins and derivatives	2M+FA-H
metab_18851	317.233	6.5139	16-Hydroxyhexadecanoic acid	HMDB0006294	16-Hydroxy hexadecanoic acid	272.235	-	C16H32O3	C18218	16-Hydroxypalmitate;16-Hydroxypalmitic acid	-	-	map01100;map00073	Metabolic pathways; Cutin, suberine and wax biosynthesis	Metabolism;Metabolism	Global and overview maps;Lipid metabolism		Lipids and lipid-like molecules	Fatty Acyls	Fatty acids and conjugates	M+FA-H
metab_18892	164.071	6.54715	Gentiatibetine	HMDB0033485	Gentiatibetine	165.079	26005-36-7	C9H11NO2	-	-	-	-	-	-	-	-		Organoheterocyclic compounds	Pyranopyridines	Not Available	M-H
metab_18895	279.196	6.54715	3-Methyl-5-pentyl-2-furanheptanoic acid	LMFA01150026;HMDB0112095	3-Methyl-5-pentyl-2-furanheptanoic acid	280.204	66612-08-6	C17H28O3	-	-	-	-	-	-	-	-		Lipids and lipid-like molecules	Fatty Acyls	Fatty acids and conjugates	M-H
metab_18898	375.217	6.54715	Alprostadil	HMDB0001442;MJDBOTE0001131	Prostaglandin E1	354.241	745-65-3	C20H34O5	C04741	Alprostadil;Prostaglandin E1;(13E)-(15S)-11alpha,15-Dihydroxy-9-oxoprost-13-enoate;PGE1	Lipids	Eicosanoids	-	-	-	-		Lipids and lipid-like molecules	Fatty Acyls	Eicosanoids	M+Na-2H
metab_18905	249.149	6.55015	Hydroxyvalerenic Acid	HMDB0036563	Valerenolic acid	250.157	-	C15H22O3	-	-	-	-	-	-	-	-		Lipids and lipid-like molecules	Prenol lipids	Sesquiterpenoids	M-H
metab_18911	641.318	6.55015	Steviolbioside	HMDB0036707;LMPR01040122	Steviobioside	642.325	-	C32H50O13	-	-	-	-	-	-	-	-		Lipids and lipid-like molecules	Prenol lipids	Terpene glycosides	M-H
metab_18953	372.217	6.57775	Norelgestromin	HMDB0015658	Norelgestromin	327.22	53016-31-2	C21H29NO2	-	-	-	-	-	-	-	-		Lipids and lipid-like molecules	Steroids and steroid derivatives	Estrane steroids	M+FA-H
metab_18962	143.049	6.58832	2-Naphthol	HMDB0012322	2-Naphthol	144.058	135-19-3	C10H8O	C11713	2-Naphthol;beta-Naphthol	-	-	-	-	-	-		Benzenoids	Naphthalenes	Naphthols and derivatives	M-H
metab_19012	709.476	6.6234	DG(20:4(5Z,8Z,11Z,14Z)/22:6(4Z,7Z,10Z,13Z,16Z,19Z)/0:0)	HMDB0007527	DG(20:4(5Z,8Z,11Z,14Z)/22:6(4Z,7Z,10Z,13Z,16Z,19Z)/0:0)	688.507	-	C45H68O5	-	-	-	-	-	-	-	-		Lipids and lipid-like molecules	Glycerolipids	Diradylglycerols	M+Na-2H
metab_19050	357.301	6.65357	Arachidic acid	LMFA01010020;HMDB0002212	Arachidic acid	312.303	506-30-9	C20H40O2	C06425	Icosanoic acid;Eicosanoic acid;Arachidic acid	Lipids	Fatty acids	map01040	Biosynthesis of unsaturated fatty acids	Metabolism	Lipid metabolism		Lipids and lipid-like molecules	Fatty Acyls	Fatty acids and conjugates	M+FA-H
metab_19078	311.168	6.6711	N-Undecylbenzenesulfonic acid	HMDB0032549	N-Undecylbenzenesulfonic acid	312.176	50854-94-9	C17H28O3S	-	-	-	-	-	-	-	-		Benzenoids	Benzene and substituted derivatives	Benzenesulfonic acids and derivatives	M-H
metab_19137	367.285	6.71182	10c-Undecenoic acid	-	-	-	-	C11H20O2	-	-	-	-	-	-	-	-		-	-	-	2M-H
metab_19158	475.342	6.73055	Schleicherastatin 6	HMDB0035513	Schleicherastatin 6	430.345	256445-61-1	C28H46O3	-	-	-	-	-	-	-	-		Lipids and lipid-like molecules	Steroids and steroid derivatives	Bile acids, alcohols and derivatives	M+FA-H
metab_19162	941.515	6.73055	Ginsenoside III	HMDB0034351	Ginsenoside III	960.529	223710-06-3	C48H80O19	-	-	-	-	-	-	-	-		Lipids and lipid-like molecules	Prenol lipids	Triterpenoids	M-H2O-H
metab_19179	607.457	6.74135	DG(14:0/18:3(6Z,9Z,12Z)/0:0)	HMDB0007017	DG(14:0/18:3(6Z,9Z,12Z)/0:0)	562.46	-	C35H62O5	-	-	-	-	-	-	-	-		Lipids and lipid-like molecules	Fatty Acyls	Lineolic acids and derivatives	M+FA-H
metab_19186	452.278	6.7481	Glycerophospho-N-Palmitoyl Ethanolamine	-	-	-	-	C21H44NO7P	-	-	-	-	-	-	-	-		-	-	-	M-H
metab_19199	571.288	6.7681	Phosphatidylinositol lyso 16:0	-	-	-	-	C25H49O12P	-	-	-	-	-	-	-	-		-	-	-	M-H
metab_19201	473.363	6.7729	Mangiferdesmethylursanone	HMDB0036018	Mangiferdesmethylursanone	428.365	259144-62-2	C29H48O2	-	-	-	-	-	-	-	-		Organic oxygen compounds	Organooxygen compounds	Alcohols and polyols	M+FA-H
metab_19203	483.272	6.77637	PG(16:0/0:0)[U]	-	-	-	-	C22H45O9P	-	-	-	-	-	-	-	-		-	-	-	M-H
metab_19204	509.288	6.77637	1-(11Z-eicosenoyl)-glycero-3-phosphate	LMGP10050026;HMDB0062305	1-(11Z-eicosenoyl)-glycero-3-phosphate	464.29	-	C23H45O7P	-	-	-	-	-	-	-	-		Lipids and lipid-like molecules	Glycerophospholipids	Glycerophosphates	M+FA-H
metab_19219	597.304	6.80007	Phosphatidylinositol lyso 18:1	-	-	-	-	C27H51O12P	-	-	-	-	-	-	-	-		-	-	-	M-H
metab_19221	378.301	6.80418	(2E,4E,12Z)-N-(2-methylpropyl)octadeca-2,4,12-trienamide	HMDB0032033	2,4,12-Octadecatrienoic acid isobutylamide	333.303	151391-69-4	C22H39NO	-	-	-	-	-	-	-	-		Lipids and lipid-like molecules	Fatty Acyls	Fatty amides	M+FA-H
metab_19224	367.321	6.8116	DG(18:0e/2:0/0:0)	-	-	-	-	C23H46O4	-	-	-	-	-	-	-	-		-	-	-	M-H2O-H
metab_19236	343.227	6.83493	Medrysone	HMDB0014398;MJDBOTE0000317	Medrysone	344.235	2668-66-8	C22H32O3	C14643	Medrysone;11beta-Hydroxy-6alpha-methylpregn-4-ene-3,20-dione	-	-	-	-	-	-		Lipids and lipid-like molecules	Steroids and steroid derivatives	Pregnane steroids	M-H
metab_19238	443.352	6.83493	Dihydrotachysterol	HMDB0015203	Dihydrotachysterol	398.355	67-96-9	C28H46O	C06957	Dihydrotachysterol	-	-	-	-	-	-		Lipids and lipid-like molecules	Steroids and steroid derivatives	Vitamin D and derivatives	M+FA-H
metab_19245	411.348	6.84767	Nervonic acid	LMFA01030092;HMDB0002368	Nervonic acid	366.35	506-37-6	C24H46O2	C08323	(15Z)-Tetracosenoic acid;Nervonic acid;(Z)-15-Tetracosenoic acid	Lipids	Fatty acids	map01040	Biosynthesis of unsaturated fatty acids	Metabolism	Lipid metabolism		Lipids and lipid-like molecules	Fatty Acyls	Fatty acids and conjugates	M+FA-H
metab_19248	354.301	6.85338	N-Hexadecanoylpyrrolidine	HMDB0032740	N-Hexadecanoylpyrrolidine	309.303	70974-48-0	C20H39NO	-	-	-	-	-	-	-	-		Organoheterocyclic compounds	Pyrrolidines	N-acylpyrrolidines	M+FA-H
metab_19249	417.241	6.85338	LysoPA(0:0/18:1(9Z))	HMDB0007851	LysoPA(0:0/18:1(9Z))	436.259	-	C21H41O7P	-	-	-	-	-	-	-	-		Lipids and lipid-like molecules	Glycerophospholipids	Glycerophosphates	M-H2O-H
metab_19275	341.306	6.8766	(Z)-11-Eicosen-1-ol	HMDB0034933	(Z)-11-Eicosen-1-ol	296.308	62442-62-0	C20H40O	-	-	-	-	-	-	-	-		Lipids and lipid-like molecules	Fatty Acyls	Fatty alcohols	M+FA-H
metab_19285	839.503	6.8796	Phosphatidylglyceride 18:1-20:5	-	-	-	-	C44H75O10P	-	-	-	-	-	-	-	-		-	-	-	M+FA-H
metab_19294	591.261	6.88548	12-Acetoxyganoderic acid	-	-	-	-	C32H42O9	-	-	-	-	-	-	-	-		-	-	-	M+Na-2H
metab_19299	450.262	6.8909	LysoPE(16:1(9Z)/0:0)	HMDB0011504	LysoPE(16:1(9Z)/0:0)	451.27	-	C21H42NO7P	-	-	-	-	-	-	-	-		Lipids and lipid-like molecules	Glycerophospholipids	Glycerophosphoethanolamines	M-H
metab_19302	211.076	6.89632	Kawain	HMDB0034212	(R)-Kawain	230.094	-	C14H14O3	C09947	Kawain;Kavain	-	-	-	-	-	-		Phenylpropanoids and polyketides	Kavalactones	Not Available	M-H2O-H
metab_19356	339.29	6.93068	Phytal	HMDB0035654	Phytal	294.292	13754-69-3	C20H38O	-	-	-	-	-	-	-	-		Lipids and lipid-like molecules	Prenol lipids	Diterpenoids	M+FA-H
metab_19368	481.353	6.94245	5b-Cholestane-3a,7a,12a,23-Tetrol	HMDB0001968	5b-Cholestane-3a,7a,12a,23-Tetrol	436.355	30673-09-7	C27H48O4	-	-	-	-	-	-	-	-		Lipids and lipid-like molecules	Steroids and steroid derivatives	Bile acids, alcohols and derivatives	M+FA-H
metab_19421	675.36	7.00182	Gingerglycolipid A	LMGL04010019;HMDB0041093	Gingerglycolipid A	676.367	145937-22-0	C33H56O14	-	-	-	-	-	-	-	-		Lipids and lipid-like molecules	Glycerolipids	Glycosylglycerols	M-H
metab_19422	309.207	7.0066	Dihydroalbocycline	-	-	-	-	C18H30O4	C15753	Dihydroalbocycline	-	-	-	-	-	-		-	-	-	M-H
metab_19435	491.374	7.01458	Schleicherastatin 3	HMDB0035512	Schleicherastatin 3	446.376	256445-53-1	C29H50O3	-	-	-	-	-	-	-	-		Lipids and lipid-like molecules	Steroids and steroid derivatives	Bile acids, alcohols and derivatives	M+FA-H
metab_19463	431.352	7.04162	Cholesterol	LMST01010001;HMDB0000067	Cholesterol	386.355	57-88-5	C27H46O	C00187	Cholesterol;Cholest-5-en-3beta-ol	Steroids	27-Carbon atoms	map01100;map00100	Metabolic pathways; Steroid biosynthesis	Metabolism;Metabolism	Global and overview maps;Lipid metabolism		Lipids and lipid-like molecules	Steroids and steroid derivatives	Cholestane steroids	M+FA-H
metab_19478	443.353	7.0564	4a-Methylzymosterol	-	-	-	-	C28H46O	-	-	-	-	-	-	-	-		-	-	-	M+FA-H
metab_19481	381.301	7.06062	Lepidiumterpenyl ester	HMDB0036865	Lepidiumterpenyl ester	382.308	255833-57-9	C23H42O4	-	-	-	-	-	-	-	-		Lipids and lipid-like molecules	Prenol lipids	Sesquiterpenoids	M-H
metab_19501	301.166	7.07642	(6R,8Z)-6-Hydroxy-3-oxotetradecenoic acid	HMDB0062363	(6R,8Z)-6-Hydroxy-3-oxotetradecenoic acid	256.167	-	C14H24O4	-	-	-	-	-	-	-	-		-	-	-	M+FA-H
metab_19506	478.293	7.07642	PE(18:1(9Z)/0:0)	LMGP02050004			-	C23H46NO7P	-	-	-	-	-	-	-	-		-	-	-	M-H
metab_19522	291.233	7.09568	Androstane-3,17-diol	HMDB0000412;HMDB0000495	3beta,17alpha-Dihydroxy-5alpha-androstane;Androstanediol	292.240230268;292.240230268	-	C19H32O2	C07632	Androstanediol;Androstane-3,17-diol	Steroids	19-Carbon atoms	-	-	-	-		Lipids and lipid-like molecules	Steroids and steroid derivatives	Androstane steroids	M-H
metab_19531	947.655	7.10045	(3beta,17alpha,23S,24S)-17,23-Epoxy-3,24,29-trihydroxy-27-norlanost-8-en-15-one	HMDB0035144	(3beta,17alpha,23S,24S)-17,23-Epoxy-3,24,29-trihydroxy-27-norlanost-8-en-15-one	474.335	-	C29H46O5	-	-	-	-	-	-	-	-		Lipids and lipid-like molecules	Prenol lipids	Triterpenoids	2M-H
metab_19559	355.321	7.13572	2(R)-hydroxydocosanoic acid	HMDB0061660	2(R)-hydroxydocosanoic acid	356.329	-	C22H44O3	-	-	-	-	-	-	-	-		Lipids and lipid-like molecules	Fatty Acyls	Fatty acids and conjugates	M-H
metab_19578	453.301	7.16163	(25R)-3beta,4beta-dihydroxycholest-5-en-26-oate(1-)	HMDB0062794	(25R)-3beta,4beta-dihydroxycholest-5-en-26-oate(1-)	432.324	-	C27H44O4	-	-	-	-	-	-	-	-		Lipids and lipid-like molecules	Steroids and steroid derivatives	Bile acids, alcohols and derivatives	M+Na-2H
metab_19583	575.468	7.1669	DG(15:0/18:3(6Z,9Z,12Z)/0:0)	HMDB0007075	DG(15:0/18:3(6Z,9Z,12Z)/0:0)	576.475	-	C36H64O5	-	-	-	-	-	-	-	-		Lipids and lipid-like molecules	Fatty Acyls	Lineolic acids and derivatives	M-H
metab_19592	459.251	7.17497	3a,7b,21-Trihydroxy-5b-cholanoic acid	HMDB0013192	3a,7b,21-Trihydroxy-5b-cholanoic acid	424.282	-	C24H40O6	-	-	-	-	-	-	-	-		Lipids and lipid-like molecules	Steroids and steroid derivatives	Androstane steroids	M+Cl
metab_19614	798.566	7.19417	Pc(18:1/13-Hode)	-	-	-	-	C44H82NO9P	-	-	-	-	-	-	-	-		-	-	-	M-H
metab_19686	849.513	7.27613	MJPW00211	;MJPW00211			-	C43H79O14P	-	-	-	-	-	-	-	-		-	-	-	M-H
metab_19689	577.483	7.28037	DG(15:0/18:2(9Z,12Z)/0:0)	HMDB0007074	DG(15:0/18:2(9Z,12Z)/0:0)	578.491	-	C36H66O5	-	-	-	-	-	-	-	-		Lipids and lipid-like molecules	Fatty Acyls	Lineolic acids and derivatives	M-H
metab_19694	591.429	7.29052	Annoglaxin	HMDB0033603	Annoglaxin	610.444	-	C35H62O8	-	-	-	-	-	-	-	-		Lipids and lipid-like molecules	Fatty Acyls	Fatty alcohols	M-H2O-H
metab_19709	328.285	7.311	Palmitoyl Serinol	LMFA08020197;HMDB0013654	Palmitoyl Serinol	329.293	126127-31-9	C19H39NO3	-	-	-	-	-	-	-	-		Lipids and lipid-like molecules	Fatty Acyls	Fatty amides	M-H
metab_19722	520.34	7.32338	Phosphatidylcholine lyso 18:1	-	-	-	-	C26H52NO7P	-	-	-	-	-	-	-	-		-	-	-	M-H
metab_19731	316.285	7.33325	Phytosphingosine	HMDB0004610;LMSP01030001	Phytosphingosine	317.293	554-62-1	C18H39NO3	C12144	Phytosphingosine;4-D-Hydroxysphinganine	-	-	map00600;map01100	Sphingolipid metabolism; Metabolic pathways	Metabolism;Metabolism	Lipid metabolism;Global and overview maps		Organic nitrogen compounds	Organonitrogen compounds	Amines	M-H
metab_19814	257.212	7.41833	3-hydroxypentadecanoic acid	HMDB0061657	3-hydroxypentadecanoic acid	258.219	-	C15H30O3	-	-	-	-	-	-	-	-		Lipids and lipid-like molecules	Fatty Acyls	Fatty acids and conjugates	M-H
metab_19836	693.45	7.44623	PA(18:2(9Z,12Z)/18:3(6Z,9Z,12Z))	HMDB0114955;LMGP10010349	PA(18:2(9Z,12Z)/18:3(6Z,9Z,12Z))	694.457	-	C39H67O8P	-	-	-	-	-	-	-	-		Lipids and lipid-like molecules	Glycerophospholipids	Glycerophosphates	M-H
metab_19843	443.353	7.45512	6-Deoxohomodolichosterone	HMDB0034430	6-Deoxohomodolichosterone	462.371	110345-06-7	C29H50O4	-	-	-	-	-	-	-	-		Lipids and lipid-like molecules	Steroids and steroid derivatives	Stigmastanes and derivatives	M-H2O-H
metab_19886	743.487	7.51067	PG(16:0/18:3(6Z,9Z,12Z))	LMGP04010906;HMDB0010576	PG(16:0/18:3(6Z,9Z,12Z))	744.494	-	C40H73O10P	-	-	-	-	-	-	-	-		Lipids and lipid-like molecules	Glycerophospholipids	Glycerophosphoglycerols	M-H
metab_19887	937.533	7.51067	Pi(19:0/18-Hete)	-	-	-	-	C48H85O14P	-	-	-	-	-	-	-	-		-	-	-	M+Na-2H
metab_19888	453.301	7.51443	13'-Carboxy-alpha-tocotrienol	HMDB0012556	13'-Carboxy-alpha-tocotrienol	454.308	-	C29H42O4	-	-	-	-	-	-	-	-		Lipids and lipid-like molecules	Prenol lipids	Quinone and hydroquinone lipids	M-H
metab_19902	453.337	7.53142	Hederagenin	-	-	-	-	C30H48O4	-	-	-	-	-	-	-	-		-	-	-	M-H2O-H
metab_19938	429.337	7.58785	Cholecalciferol	HMDB0000876;MJDBOTE0000828	Vitamin D3	384.339	-	C27H44O	C05443	Vitamin D3;Cholecalciferol;Calciol	Vitamins and Cofactors	Vitamins	map01100;map01110;map00100	Metabolic pathways; Biosynthesis of secondary metabolites; Steroid biosynthesis	Metabolism;Metabolism;Metabolism	Global and overview maps;Global and overview maps;Lipid metabolism		Lipids and lipid-like molecules	Steroids and steroid derivatives	Vitamin D and derivatives	M+FA-H
metab_20025	583.298	7.72012	Lappaconitine	;MJDBOTE0001319			-	C32H44N2O8	C08694	Lappaconitine	-	-	-	-	-	-		-	-	-	M-H
metab_20043	457.368	7.753	Panaxatriol	HMDB0038244	Panaxatriol	476.387	-	C30H52O4	-	-	-	-	-	-	-	-		Lipids and lipid-like molecules	Prenol lipids	Triterpenoids	M-H2O-H
metab_20058	401.342	7.77772	5Alpha-Cholestan-3Beta-Ol-6-One	-	-	-	-	C27H46O2	-	-	-	-	-	-	-	-		-	-	-	M-H
metab_20065	479.353	7.79622	Ursololactone	HMDB0036674	Ursololactone	498.371	28290-51-9	C32H50O4	-	-	-	-	-	-	-	-		Lipids and lipid-like molecules	Prenol lipids	Triterpenoids	M-H2O-H
metab_20072	699.496	7.80413	PA(18:0/18:2(9Z,12Z))	HMDB0007861;LMGP10010036	PA(18:0/18:2(9Z,12Z))	700.504	-	C39H73O8P	C00416	Phosphatidate;Phosphatidic acid;1,2-Diacyl-sn-glycerol 3-phosphate;3-sn-Phosphatidate	Lipids	Phospholipids	map01100;map00564;map01110;map00561;map04070	Metabolic pathways; Glycerophospholipid metabolism; Biosynthesis of secondary metabolites; Glycerolipid metabolism; Phosphatidylinositol signaling system	Metabolism;Metabolism;Metabolism;Metabolism;Environmental Information Processing	Global and overview maps;Lipid metabolism;Global and overview maps;Lipid metabolism;Signal transduction		Lipids and lipid-like molecules	Glycerophospholipids	Glycerophosphates	M-H
metab_20082	613.408	7.82615	28-Glucopyranosyl-3-methyloleanolic acid	HMDB0036966	28-Glucopyranosyl-3-methyloleanolic acid	632.429	51996-63-5	C37H60O8	-	-	-	-	-	-	-	-		Lipids and lipid-like molecules	Prenol lipids	Terpene glycosides	M-H2O-H
metab_20129	457.368	7.93037	Soyasapogenol B	HMDB0034648	Soyasapogenol B	458.376	595-15-3	C30H50O3	C08980	Soyasapogenol B;24-Hydroxysophoradiol	-	-	-	-	-	-		Lipids and lipid-like molecules	Prenol lipids	Triterpenoids	M-H
metab_20157	311.222	8.00178	13(S)-HpODE	HMDB0003871	13-L-Hydroperoxylinoleic acid	312.23	-	C18H32O4	C04717	(9Z,11E)-(13S)-13-Hydroperoxyoctadeca-9,11-dienoic acid;(9Z,11E)-(13S)-13-Hydroperoxyoctadeca-9,11-dienoate;13(S)-HPODE;13S-Hydroperoxy-9Z,11E-octadecadienoic acid	-	-	map01100;map00591	Metabolic pathways; Linoleic acid metabolism	Metabolism;Metabolism	Global and overview maps;Lipid metabolism		Lipids and lipid-like molecules	Fatty Acyls	Lineolic acids and derivatives	M-H
metab_20227	477.358	8.15572	13'-Hydroxy-gamma-tocopherol	HMDB0012561	13'-Hydroxy-gamma-tocopherol	432.36	-	C28H48O3	-	-	-	-	-	-	-	-		Lipids and lipid-like molecules	Prenol lipids	Quinone and hydroquinone lipids	M+FA-H
metab_20256	770.579	8.21852	Glucosylceramide (d18:1/9Z-18:1)	HMDB0004970	GlcCer(d18:1/9Z-18:1)	725.581	-	C42H79NO8	C01190	Glucosylceramide;Glucocerebroside;beta-D-Glucosyl-(1<|right|1)-ceramide;D-Glucosyl-N-acylsphingosine	Lipids	Glycolipids	map00600;map01100	Sphingolipid metabolism; Metabolic pathways	Metabolism;Metabolism	Lipid metabolism;Global and overview maps		Lipids and lipid-like molecules	Sphingolipids	Glycosphingolipids	M+FA-H
metab_20324	429.373	8.39743	DL-Alpha-Tocopherol	;MJDBOTE0000728			-	C29H50O2	-	-	-	-	-	-	-	-		-	-	-	M-H
metab_20330	227.107	8.41132	(3Z,6E)-2,2,6-trimethyl-12-oxabicyclo[8.2.1]trideca-3,6,10(13)-triene-5,11-dione	-	-	-	-	C15H18O3	-	-	-	-	-	-	-	-		-	-	-	M-H2O-H
metab_20332	395.331	8.42947	Vitamin D2	LMST03010001;HMDB0000900;MJDBOTE0000827	Ergocalciferol	396.339	-	C28H44O	C05441	Vitamin D2;Ergocalciferol	Vitamins and Cofactors	Vitamins	map01100;map01110;map00100	Metabolic pathways; Biosynthesis of secondary metabolites; Steroid biosynthesis	Metabolism;Metabolism;Metabolism	Global and overview maps;Global and overview maps;Lipid metabolism		Lipids and lipid-like molecules	Steroids and steroid derivatives	Vitamin D and derivatives	M-H
metab_20345	461.363	8.45107	(22Alpha)-hydroxy-5alpha-campestan-3-one	HMDB0012112	(22Alpha)-hydroxy-5alpha-campestan-3-one	416.365	-	C28H48O2	-	-	-	-	-	-	-	-		Lipids and lipid-like molecules	Glycerolipids	Diradylglycerols	M+FA-H
metab_20354	645.531	8.48657	(R)-2-hydroxystearic acid	-	-	-	-	C18H36O3	-	-	-	-	-	-	-	-		-	-	-	2M+FA-H
metab_20357	659.547	8.4898	Santalol	HMDB0030232;MJDBOTE0001258	(2R,6S,7S,10Z)-beta-Santala-3(15),10-dien-12-ol	220.183	-	C15H24O	C09720	beta-Santalol	-	-	-	-	-	-		Lipids and lipid-like molecules	Prenol lipids	Sesquiterpenoids	3M-H
metab_20366	427.358	8.50772	Stigmastentriol	HMDB0029607	Stigmastentriol	446.376	-	C29H50O3	-	-	-	-	-	-	-	-		Lipids and lipid-like molecules	Steroids and steroid derivatives	Stigmastanes and derivatives	M-H2O-H
metab_20368	605.277	8.51102	Geldanamycin	;MJDBOTE0000910			-	C29H40N2O9	C11222	Geldanamycin	Antibiotics	Polyketides and nonribosomal peptides	-	-	-	-		-	-	-	M+FA-H
metab_20380	295.227	8.53958	9(S)-HODE	HMDB0004670	alpha-Dimorphecolic acid	296.235	-	C18H32O3	C14767	9(S)-HODE;(9S)-Hydroxyoctadecadienoic acid;(10E,12Z)-(9S)-9-Hydroxyoctadeca-10,12-dienoic acid	-	-	map00591	Linoleic acid metabolism	Metabolism	Lipid metabolism		Lipids and lipid-like molecules	Fatty Acyls	Lineolic acids and derivatives	M-H
metab_20411	409.347	8.69178	5Alpha-Cholestanol	HMDB0000908	5alpha-Cholestanol	388.371	80-97-7	C27H48O	-	-	-	-	-	-	-	-		Lipids and lipid-like molecules	Steroids and steroid derivatives	Cholestane steroids	M+Na-2H
metab_20478	193.071	8.77168	(2R,3R,4S,5R,6R)-2-(hydroxymethyl)-6-methoxyoxane-3,4,5-triol	;MJDBWX000002245			-	C7H14O6	-	-	-	-	-	-	-	-		-	-	-	M-H
metab_20483	301.253	8.73223	3-pentadecylbenzene-1,2-diol	LMPK15020001			-	C21H36O2	-	-	-	-	-	-	-	-		-	-	-	M-H2O-H
metab_20485	473.399	8.72237	(3beta,4alpha,5alpha,14alpha,24xi)-4,14,24-Trimethylcholest-9(11)-en-3-ol	HMDB0036429	(3beta,4alpha,5alpha,14alpha,24xi)-4,14,24-Trimethylcholest-9(11)-en-3-ol	428.402	68520-27-4	C30H52O	-	-	-	-	-	-	-	-		Lipids and lipid-like molecules	Steroids and steroid derivatives	Ergostane steroids	M+FA-H
metab_20520	473.363	8.56965	Soyasapogenol A	HMDB0034505	Soyasapogenol A	474.371	508-01-0	C30H50O4	C17419	Soyasapogenol A	-	-	-	-	-	-		Lipids and lipid-like molecules	Prenol lipids	Triterpenoids	M-H
metab_20557	439.358	8.4898	Quasiprotopanaxatriol	HMDB0041533	Quasiprotopanaxatriol	458.376	-	C30H50O3	-	-	-	-	-	-	-	-		Lipids and lipid-like molecules	Prenol lipids	Triterpenoids	M-H2O-H
metab_20569	738.508	8.44728	Pe(18:1/13-Hode)	-	-	-	-	C41H76NO9P	-	-	-	-	-	-	-	-		-	-	-	M-H2O-H
metab_20646	471.347	8.28932	Echinocystic acid	;MJDBOTE0000948			-	C30H48O4	C08942	Echinocystic acid	-	-	-	-	-	-		-	-	-	M-H
metab_20693	571.4	8.18032	Saringosterol 3-glucoside	HMDB0029767	Saringosterol 3-glucoside	590.418	-	C35H58O7	-	-	-	-	-	-	-	-		Lipids and lipid-like molecules	Glycerolipids	Glycosylglycerols	M-H2O-H
metab_20696	536.505	8.16602	N-Palmitoylsphingosine	HMDB0004949	Cer(d18:1/16:0)	537.512	-	C34H67NO3	C00195	N-Acylsphingosine;Ceramide;N-Acylsphing-4-enine;(4E)-Sphing-4-enine ceramide	-	-	map01100;map00600;map04933	Metabolic pathways; Sphingolipid metabolism; AGE-RAGE signaling pathway in diabetic complications	Metabolism;Metabolism;Human Diseases	Global and overview maps;Lipid metabolism;Endocrine and metabolic disease		Lipids and lipid-like molecules	Sphingolipids	Ceramides	M-H
metab_20700	736.493	8.15938	Phosphatidylethanolamine 18:3-18:2	-	-	-	-	C41H72NO8P	-	-	-	-	-	-	-	-		-	-	-	M-H
metab_20715	595.371	8.13807	Diphthamide	HMDB0060473	Diphthamide	298.188	-	C13H24N5O3+	C02872	Peptide diphthamide;Diphthamide;EF-2 diphthamide;Elongation factor 2 diphthamide	-	-	-	-	-	-		Organic acids and derivatives	Carboxylic acids and derivatives	Amino acids, peptides, and analogues	2M-H
metab_20727	515.374	8.11997	Ambolic acid	HMDB0035713	Ambolic acid	470.376	13878-93-8	C31H50O3	-	-	-	-	-	-	-	-		Organic oxygen compounds	Organooxygen compounds	Carbohydrates and carbohydrate conjugates	M+FA-H
metab_20753	455.353	8.06123	Ursolic Acid	HMDB0002395;LMPR0106180007;MJDBOTE0001483	Ursolic acid	456.36	77-52-1	C30H48O3	C08988	Ursolic acid	-	-	-	-	-	-		Lipids and lipid-like molecules	Prenol lipids	Triterpenoids	M-H
metab_20756	780.555	8.05793	Phosphatidylcholine 18:2-18:2	-	-	-	-	C44H80NO8P	-	-	-	-	-	-	-	-		-	-	-	M-H
metab_20786	461.363	8.00178	(3beta,22R,23R,24S)-3,22,23-Trihydroxystigmastan-6-one	HMDB0039713	(3beta,22R,23R,24S)-3,22,23-Trihydroxystigmastan-6-one	462.371	90524-90-6	C29H50O4	-	-	-	-	-	-	-	-		Lipids and lipid-like molecules	Steroids and steroid derivatives	Stigmastanes and derivatives	M-H
metab_20789	427.358	7.99038	Alpha-Tocopherolquinone	HMDB0034408	alpha-Tocopherolquinone	446.376	7559-04-08	C29H50O3	-	-	-	-	-	-	-	-		Lipids and lipid-like molecules	Prenol lipids	Diterpenoids	M-H2O-H
metab_20791	389.342	7.99038	20-Tetracosene-1,18-diol	HMDB0040887	20-Tetracosene-1,18-diol	368.365	151454-15-8	C24H48O2	-	-	-	-	-	-	-	-		Lipids and lipid-like molecules	Fatty Acyls	Fatty alcohols	M+Na-2H
metab_20816	766.54	7.93368	Phosphatidylcholine 17:2-18:2	-	-	-	-	C43H78NO8P	-	-	-	-	-	-	-	-		-	-	-	M-H
metab_20845	605.405	7.87832	Antibiotic X 14889A	HMDB0033336	Antibiotic X 14889A	584.429	97671-96-0	C33H60O8	-	-	-	-	-	-	-	-		Lipids and lipid-like molecules	Prenol lipids	Sesterterpenoids	M+Na-2H
metab_20887	554.515	7.79987	Cer(t18:0/16:0)	HMDB0010697;LMSP02030001	Cer(t18:0/16:0)	555.523	-	C34H69NO4	-	-	-	-	-	-	-	-		Lipids and lipid-like molecules	Sphingolipids	Ceramides	M-H
metab_20943	751.371	7.71568	8-hydroxy-2,7,7,11,15-pentamethyl-5,12,16-trioxapentacyclo[9.8.0.0	-	-	-	-	C21H28O6	-	-	-	-	-	-	-	-		-	-	-	2M-H
metab_20952	740.567	7.70575	PC(16:0e/13-HODE)	-	-	-	-	C42H82NO8P	-	-	-	-	-	-	-	-		-	-	-	M-H2O-H
metab_20963	493.353	7.69172	Tetradec-5-ynoic acid	-	-	-	-	C14H24O2	-	-	-	-	-	-	-	-		-	-	-	2M+FA-H
metab_20977	723.497	7.67383	PA(20:2(11Z,14Z)/18:2(9Z,12Z))	LMGP10010569;HMDB0115493	PA(20:2(11Z,14Z)/18:2(9Z,12Z))	724.504	-	C41H73O8P	-	-	-	-	-	-	-	-		Lipids and lipid-like molecules	Glycerophospholipids	Glycerophosphates	M-H
metab_20999	309.28	7.63932	Eicosenoic acid	HMDB0033022;HMDB0002231	Ganosporeric acid A;11Z-Eicosenoic acid	526.256668192;310.28718046	-	C20H38O2	C16526	Icosenoic acid;Eicosenoic acid;11-Icosenoic acid;11-Eicosenoic acid;(11Z)-Icosenoic acid;(11Z)-Eicosenoic acid;(Z)-Icosa-11-enoic acid	Lipids	Fatty acids	map01040	Biosynthesis of unsaturated fatty acids	Metabolism	Lipid metabolism		Lipids and lipid-like molecules	Fatty Acyls	Fatty acids and conjugates	M-H
metab_21020	443.353	7.61242	(3beta,5alpha,6beta,22E,24R)-23-Methylergosta-7,22-diene-3,5,6-triol	HMDB0033633	(3beta,5alpha,6beta,22E,24R)-23-Methylergosta-7,22-diene-3,5,6-triol	444.36	243449-54-9	C29H48O3	-	-	-	-	-	-	-	-		Lipids and lipid-like molecules	Steroids and steroid derivatives	Ergostane steroids	M-H
metab_21026	341.306	7.60817	MG(P-18:0e/0:0/0:0)	-	-	-	-	C21H42O3	-	-	-	-	-	-	-	-		-	-	-	M-H
metab_21034	263.15	7.60017	Hexyl glucoside	HMDB0031688	Hexyl glucoside	264.157	59080-45-4	C12H24O6	-	-	-	-	-	-	-	-		Lipids and lipid-like molecules	Fatty Acyls	Fatty acyl glycosides	M-H
metab_21078	900.56	7.54805	PE(DiMe(13,5)/MonoMe(11,3))	HMDB0061494	PE(DiMe(13,5)/MonoMe(11,3))	865.583	-	C48H84NO10P	-	-	-	-	-	-	-	-		Lipids and lipid-like molecules	Glycerophospholipids	Glycerophosphoethanolamines	M+Cl
metab_21091	397.311	7.53142	Calcitriol	HMDB0001903;MJDBOTE0001190	Calcitriol	416.329	32222-06-3	C27H44O3	C01673	Calcitriol;1alpha,25-Dihydroxyvitamin D3;(1S,3R,5Z,7E)-9,10-Seco-5,7,10(19)-cholestatriene-1,3,25-triol	Hormones and transmitters	Steroid hormones	map01100;map00100	Metabolic pathways; Steroid biosynthesis	Metabolism;Metabolism	Global and overview maps;Lipid metabolism		Lipids and lipid-like molecules	Steroids and steroid derivatives	Vitamin D and derivatives	M-H2O-H
metab_21115	857.519	7.50307	Pi(18:1/13-Hode)	-	-	-	-	C45H81O14P	-	-	-	-	-	-	-	-		-	-	-	M-H2O-H
metab_21124	962.665	7.49633	3-O-Sulfogalactosylceramide (d18:1/26:1(17Z))	HMDB0012319	3-O-Sulfogalactosylceramide (d18:1/26:1(17Z))	917.663	928346-40-1	C50H95NO11S	C06125	Sulfatide;Galactosylceramide sulfate;Cerebroside 3-sulfate	Lipids	Glycolipids	map00600;map01100	Sphingolipid metabolism; Metabolic pathways	Metabolism;Metabolism	Lipid metabolism;Global and overview maps		Lipids and lipid-like molecules	Sphingolipids	Glycosphingolipids	M+FA-H
metab_21140	714.508	7.478	1-Palmitoyl-2-linoleoyl PE	-	-	-	-	C39H74NO8P	-	-	-	-	-	-	-	-		-	-	-	M-H
metab_21150	844.615	7.4658	PE(24:1(15Z)/16:1(9Z))	HMDB0009749	PE(24:1(15Z)/16:1(9Z))	799.609	-	C45H86NO8P	-	-	-	-	-	-	-	-		Lipids and lipid-like molecules	Glycerophospholipids	Glycerophosphoethanolamines	M+FA-H
metab_21187	453.337	7.42558	Corosolic acid	-	-	-	-	C30H48O4	-	-	-	-	-	-	-	-		-	-	-	M-H2O-H
metab_21208	457.332	7.40695	25-Hydroxyvitamin D2	LMST03010030;HMDB0001438	25-Hydroxyvitamin D2	412.334	21343-40-8	C28H44O2	-	-	-	-	-	-	-	-		Lipids and lipid-like molecules	Steroids and steroid derivatives	Vitamin D and derivatives	M+FA-H
metab_21234	439.285	7.38442	3,5,9,23-Tetrahydroxy-18,22-cycloergosta-6,8(14)-dien-11-one	-	-	-	-	C28H42O5	-	-	-	-	-	-	-	-		-	-	-	M-H2O-H
metab_21268	421.275	7.34882	Tetrahydropersin	LMFA05000700;HMDB0036344	Tetrahydropersin	384.324	163955-67-7	C23H44O4	-	-	-	-	-	-	-	-		Lipids and lipid-like molecules	Fatty Acyls	Fatty alcohols	M+K-2H
metab_21322	297.243	7.29855	(+)-15,16-Dihydroxyoctadecanoic acid	HMDB0031008	(+)-15,16-Dihydroxyoctadecanoic acid	316.261	-	C18H36O4	-	-	-	-	-	-	-	-		Lipids and lipid-like molecules	Fatty Acyls	Fatty acids and conjugates	M-H2O-H
metab_21344	443.353	7.26773	Episterol	HMDB0006847;LMST01030115	Episterol	398.355	474-68-0	C28H46O	C15777	Episterol	-	-	map01100;map01110;map00100	Metabolic pathways; Biosynthesis of secondary metabolites; Steroid biosynthesis	Metabolism;Metabolism;Metabolism	Global and overview maps;Global and overview maps;Lipid metabolism		Lipids and lipid-like molecules	Steroids and steroid derivatives	Ergostane steroids	M+FA-H
metab_21363	768.503	7.25295	Araliacerebroside	HMDB0033621	Araliacerebroside	731.555	-	C40H77NO10	-	-	-	-	-	-	-	-		Lipids and lipid-like molecules	Sphingolipids	Glycosphingolipids	M+K-2H
metab_21376	363.301	7.24235	Docosanol	HMDB0014770	Docosanol	326.355	30303-65-2	C22H46O	-	-	-	-	-	-	-	-		Lipids and lipid-like molecules	Fatty Acyls	Fatty alcohols	M+K-2H
metab_21416	873.514	7.1989	Pi(16:0/11,12-Eet)	-	-	-	-	C45H79O14P	-	-	-	-	-	-	-	-		-	-	-	M-H
metab_21424	375.042	7.19417	{[1,4-dihydroxy-1-(1-oxo-1H-isochromen-3-yl)butan-2-yl]oxy}sulfonic acid	HMDB0130090	{[1,4-dihydroxy-1-(1-oxo-1H-isochromen-3-yl)butan-2-yl]oxy}sulfonic acid	330.041	-	C13H14O8S	-	-	-	-	-	-	-	-		Phenylpropanoids and polyketides	Isocoumarins and derivatives	Not Available	M+FA-H
metab_21431	417.337	7.1894	7alpha,24-dihydroxy-5beta-cholestan-3-one	LMST04030169;HMDB0062419	7alpha,24-dihydroxy-5beta-cholestan-3-one	418.345	-	C27H46O3	-	-	-	-	-	-	-	-		Lipids and lipid-like molecules	Steroids and steroid derivatives	Bile acids, alcohols and derivatives	M-H
metab_21459	709.445	7.16163	DG(11D3/9D3/0:0)	HMDB0116375	DG(11D3/9D3/0:0)	672.497	-	C41H68O7	-	-	-	-	-	-	-	-		Lipids and lipid-like molecules	Fatty Acyls	Fatty acids and conjugates	M+K-2H
metab_21463	320.259	7.16163	Alpha-Linolenoyl Ethanolamide	HMDB0013624	Alpha-Linolenoyl ethanolamide	321.267	-	C20H35NO2	C13828	8,11,14-Eicosatrienoylethanolamide;N-(8Z,11Z,14Z-Eicosatrienoyl)-ethanolamine	-	-	-	-	-	-		Organic nitrogen compounds	Organonitrogen compounds	Amines	M-H
metab_21471	398.291	7.15032	Oleoyl sarcosine	-	-	-	-	C21H39NO3	-	-	-	-	-	-	-	-		-	-	-	M+FA-H
metab_21497	317.212	7.12545	15-Hepe	HMDB0010209	15-HEPE	318.219	97850-14-1	C20H30O3	-	-	-	-	-	-	-	-		Lipids and lipid-like molecules	Fatty Acyls	Eicosanoids	M-H
metab_21518	349.238	7.10425	14-(hydroxymethyl)-5,9-dimethyltetracyclo[11.2.1.0	-	-	-	-	C20H32O2	-	-	-	-	-	-	-	-		-	-	-	M+FA-H
metab_21534	507.441	7.09147	Palmitoleic acid	HMDB0012328;LMFA01030056;HMDB0003229	Palmitelaidic acid;Palmitoleic acid	254.224580204;254.224580204	373-49-9	C16H30O2	C08362	(9Z)-Hexadecenoic acid;Palmitoleic acid;cis-9-Hexadecenoic acid;(9Z)-Hexadec-9-enoate	Lipids	Fatty acids	map00061	Fatty acid biosynthesis	Metabolism	Lipid metabolism		Lipids and lipid-like molecules	Fatty Acyls	Fatty acids and conjugates	2M-H
metab_21539	471.384	7.08773	Beta-amyrin-H2O	-	-	-	-	C30H50O	-	-	-	-	-	-	-	-		-	-	-	M+FA-H
metab_21568	720.49	7.06437	Acidissiminin epoxide	HMDB0038620	Acidissiminin epoxide	675.486	139083-09-3	C43H65NO5	-	-	-	-	-	-	-	-		Benzenoids	Benzene and substituted derivatives	Benzoic acids and derivatives	M+FA-H
metab_21590	341.306	7.05195	21-hydroxy-heneicosanoic acid	LMFA01050076			-	C21H42O3	-	-	-	-	-	-	-	-		-	-	-	M-H
metab_21601	452.278	7.04162	MJAW00535	;MJAW00535			-	C21H44NO7P	-	-	-	-	-	-	-	-		-	-	-	M-H
metab_21630	373.274	7.01458	3beta-hydroxy-delta5-cholenic acid	HMDB0000308;MJDBOTE0001178	3b-Hydroxy-5-cholenoic acid	374.282	-	C24H38O3	-	-	-	-	-	-	-	-		Lipids and lipid-like molecules	Steroids and steroid derivatives	Bile acids, alcohols and derivatives	M-H
metab_21642	491.338	7.0066	3,5,9-Trihydroxyergost-7-en-6-one	HMDB0032875	3,5,9-Trihydroxyergost-7-en-6-one	446.34	211486-13-4	C28H46O4	-	-	-	-	-	-	-	-		Lipids and lipid-like molecules	Steroids and steroid derivatives	Ergostane steroids	M+FA-H
metab_21653	706.474	6.99738	Spirolide E	HMDB0030494	Spirolide E	725.487	183159-71-9	C43H67NO8	-	-	-	-	-	-	-	-		Lipids and lipid-like molecules	Fatty Acyls	Fatty alcohols	M-H2O-H
metab_21665	603.39	6.98443	3-Epipapyriferic acid	HMDB0040498	3-Epipapyriferic acid	604.398	151890-02-7	C35H56O8	-	-	-	-	-	-	-	-		Lipids and lipid-like molecules	Prenol lipids	Terpene glycosides	M-H
metab_21678	601.447	6.97355	Linolenic acid	HMDB0001388	alpha-Linolenic acid	278.225	-	C18H30O2	C06427	(9Z,12Z,15Z)-Octadecatrienoic acid;alpha-Linolenic acid;9,12,15-Octadecatrienoic acid;Linolenate;alpha-Linolenate	Lipids	Fatty acids	map01100;map00592;map01110;map01040	Metabolic pathways; alpha-Linolenic acid metabolism; Biosynthesis of secondary metabolites; Biosynthesis of unsaturated fatty acids	Metabolism;Metabolism;Metabolism;Metabolism	Global and overview maps;Lipid metabolism;Global and overview maps;Lipid metabolism		Lipids and lipid-like molecules	Fatty Acyls	Lineolic acids and derivatives	2M+FA-H
metab_21714	642.362	6.93608	Mucronine D	HMDB0029335	Mucronine D	661.384	38496-00-3	C37H51N5O6	C10009	Mucronine A	-	-	-	-	-	-		Organic acids and derivatives	Carboxylic acids and derivatives	Amino acids, peptides, and analogues	M-H2O-H
metab_21731	627.462	6.9214	Squamocin L	HMDB0030940	Squamocin L	606.486	98767-45-4	C37H66O6	-	-	-	-	-	-	-	-		Lipids and lipid-like molecules	Fatty Acyls	Fatty alcohols	M+Na-2H
metab_21747	691.406	6.9106	Monensin	-	-	-	-	C36H62O11	C06693	Monensin;Monensin A	Antibiotics	Polyketides and nonribosomal peptides	-	-	-	-		-	-	-	M+Na-2H
metab_21785	511.304	6.8909	1-Stearoylglycerophosphoglycerol	HMDB0061697	1-Stearoylglycerophosphoglycerol	512.311	-	C24H49O9P	-	-	-	-	-	-	-	-		Lipids and lipid-like molecules	Glycerophospholipids	Glycerophosphoglycerols	M-H
metab_21793	599.32	6.88548	Phosphatidylinositol lyso 18:0	-	-	-	-	C27H53O12P	-	-	-	-	-	-	-	-		-	-	-	M-H
metab_21796	503.374	6.88548	Heterobetulin	HMDB0038800	Heterobetulin	458.376	74715-49-4	C30H50O3	-	-	-	-	-	-	-	-		Lipids and lipid-like molecules	Prenol lipids	Triterpenoids	M+FA-H
metab_21797	477.358	6.88548	Gamma-Tocopheryl quinone	HMDB0033998	gamma-Tocopheryl quinone	432.36	-	C28H48O3	-	-	-	-	-	-	-	-		Lipids and lipid-like molecules	Prenol lipids	Diterpenoids	M+FA-H
metab_21831	437.267	6.87138	Sorbitan palmitate	HMDB0029887;LMFA07011019	Sorbitan palmitate	402.298	26266-57-9	C22H42O6	-	-	-	-	-	-	-	-		Lipids and lipid-like molecules	Fatty Acyls	Fatty acid esters	M+Cl
metab_21840	455.316	6.86517	(6alpha,22E)-6-Hydroxy-4,7,22-ergostatrien-3-one	HMDB0037380	(6alpha,22E)-6-Hydroxy-4,7,22-ergostatrien-3-one	410.318	114020-59-6	C28H42O2	-	-	-	-	-	-	-	-		Lipids and lipid-like molecules	Steroids and steroid derivatives	Ergostane steroids	M+FA-H
metab_21853	433.332	6.85338	3alpha,7alpha-Dihydroxycoprostanic acid	HMDB0000359	3alpha,7alpha-Dihydroxycoprostanic acid	434.34	17974-66-2	C27H46O4	-	-	-	-	-	-	-	-		Lipids and lipid-like molecules	Steroids and steroid derivatives	Bile acids, alcohols and derivatives	M-H
metab_21856	299.259	6.85338	DL-2-hydroxy stearic acid	LMFA02000120			-	C18H36O3	-	-	-	-	-	-	-	-		-	-	-	M-H
metab_21880	391.225	6.82383	LysoPA(0:0/16:0)	HMDB0007849	LysoPA(0:0/16:0)	410.243	-	C19H39O7P	-	-	-	-	-	-	-	-		Lipids and lipid-like molecules	Glycerophospholipids	Glycerophosphates	M-H2O-H
metab_21894	485.282	6.80007	Neuromedin N (1-4)	HMDB0013021	Neuromedin N (1-4)	504.295	-	C26H40N4O6	-	-	-	-	-	-	-	-		Organic acids and derivatives	Carboxylic acids and derivatives	Amino acids, peptides, and analogues	M-H2O-H
metab_21895	395.316	6.80007	5-Dodecenoic acid	HMDB0000529	5Z-Dodecenoic acid	198.162	-	C12H22O2	-	-	-	-	-	-	-	-		Lipids and lipid-like molecules	Fatty Acyls	Fatty acids and conjugates	2M-H
metab_21909	435.251	6.78332	1-Oleoyl Lysophosphatidic Acid (sodium salt)	-	-	-	-	C21H41O7P	-	-	-	-	-	-	-	-		-	-	-	M-H
metab_21913	481.332	6.77637	Germacrone	;MJDBOTE0001285			-	C15H22O	C16966	Germacrone	-	-	-	-	-	-		-	-	-	2M+FA-H
metab_21923	215.004	6.7681	(4-ethyl-2,6-dihydroxyphenyl)oxidanesulfonic acid	HMDB0128030	(4-ethyl-2,6-dihydroxyphenyl)oxidanesulfonic acid	234.02	-	C8H10O6S	-	-	-	-	-	-	-	-		Organic acids and derivatives	Organic sulfuric acids and derivatives	Arylsulfates	M-H2O-H
metab_21931	364.285	6.7481	N-Linoleoyl GABA	HMDB0062334	N-Linoleoyl GABA	365.293	-	C22H39NO3	-	-	-	-	-	-	-	-		Organic acids and derivatives	Carboxylic acids and derivatives	Amino acids, peptides, and analogues	M-H
metab_21951	507.272	6.73692	1-(11Z,14Z-eicosadienoyl)-glycero-3-phosphate	LMGP10050027;HMDB0062303;HMDB0114758	1-(11Z,14Z-eicosadienoyl)-glycero-3-phosphate;LysoPA(20:2(11Z,14Z)/0:0)	462.274640723;462.274640723	-	C23H43O7P	-	-	-	-	-	-	-	-		Lipids and lipid-like molecules	Glycerophospholipids	Glycerophosphates	M+FA-H
metab_21963	623.377	6.73055	12-deoxyphorbol-13-hexadecanoate	-	-	-	-	C36H58O6	-	-	-	-	-	-	-	-		-	-	-	M+K-2H
metab_21974	520.267	6.72168	LysoPE(0:0/18:3(9Z,12Z,15Z))	HMDB0011479	LysoPE(0:0/18:3(9Z,12Z,15Z))	475.27	-	C23H42NO7P	-	-	-	-	-	-	-	-		Lipids and lipid-like molecules	Glycerophospholipids	Glycerophosphoethanolamines	M+FA-H
metab_21983	247.134	6.7182	Quadrone	-	-	-	-	C15H20O3	C09537	Quadrone	-	-	-	-	-	-		-	-	-	M-H
metab_21991	214.087	6.71182	Macaridine	HMDB0039455	Macaridine	215.095	-	C13H13NO2	-	-	-	-	-	-	-	-		Organoheterocyclic compounds	Pyridines and derivatives	Hydropyridines	M-H
metab_21995	351.221	6.70702	13,14-Dihydro-15-keto-PGE2	LMFA03010031;HMDB0002776	13,14-Dihydro-15-keto-PGE2	352.225	363-23-5	C20H32O5	C04671	(5Z)-(15S)-11alpha-Hydroxy-9,15-dioxoprostanoate	-	-	-	-	-	-		Lipids and lipid-like molecules	Fatty Acyls	Eicosanoids	M-H
metab_22013	240.066	6.6943	N6-(Delta2-Isopentenyl)-Adenine	-	-	-	-	C10H13N5	C04083	N6-(Delta2-Isopentenyl)-adenine;N6-(3-Methylbut-2-enyl)adenine;6-(gamma,gamma-Dimethylallylamino)purine;N6-Dimethylallyladenine	-	-	map01110;map04075;map00908	Biosynthesis of secondary metabolites; Plant hormone signal transduction; Zeatin biosynthesis	Metabolism;Environmental Information Processing;Metabolism	Global and overview maps;Signal transduction;Metabolism of terpenoids and polyketides		-	-	-	M+K-2H
metab_22027	505.257	6.68638	1-(8Z,11Z,14Z-eicosatrienoyl)-glycero-3-phosphate	HMDB0114759;HMDB0062313;LMGP10050028	LysoPA(20:3(8Z,11Z,14Z)/0:0);1-(8Z,11Z,14Z-eicosatrienoyl)-glycero-3-phosphate	460.258990658;460.258990658	-	C23H41O7P	-	-	-	-	-	-	-	-		Lipids and lipid-like molecules	Glycerophospholipids	Glycerophosphates	M+FA-H
metab_22076	761.46	6.66473	PA(18:3(6Z,9Z,12Z)/20:1(11Z))	LMGP10010384;HMDB0114986	PA(18:3(6Z,9Z,12Z)/20:1(11Z))	724.504	-	C41H73O8P	-	-	-	-	-	-	-	-		Lipids and lipid-like molecules	Glycerophospholipids	Glycerophosphates	M+K-2H
metab_22091	477.322	6.66077	3beta,7alpha-Dihydroxy-5-cholestenoate	HMDB0012454	3beta,7alpha-Dihydroxy-5-cholestenoate	432.324	115538-84-6	C27H44O4	C17335	3beta,7alpha-Dihydroxy-5-cholestenoate;3beta,7alpha-Dihydroxy-5-cholesten-26-oic acid	-	-	-	-	-	-		Lipids and lipid-like molecules	Steroids and steroid derivatives	Bile acids, alcohols and derivatives	M+FA-H
metab_22118	501.322	6.64932	MJAW00219	;MJAW00219			-	C30H46O6	-	-	-	-	-	-	-	-		-	-	-	M-H
metab_22176	393.301	6.6234	5-Heptadecyl-1,3-benzenediol	HMDB0038530	5-Heptadecyl-1,3-benzenediol	348.303	41442-57-3	C23H40O2	-	-	-	-	-	-	-	-		Benzenoids	Phenols	Benzenediols	M+FA-H
metab_22181	887.501	6.61913	Phosphatidylglyceride 20:4-22:6	-	-	-	-	C48H75O10P	-	-	-	-	-	-	-	-		-	-	-	M+FA-H
metab_22187	297.243	6.61913	5-Hexyltetrahydro-2-furanoctanoic acid	HMDB0031127	5-Hexyltetrahydro-2-furanoctanoic acid	298.251	61781-98-4	C18H34O3	-	-	-	-	-	-	-	-		Lipids and lipid-like molecules	Fatty Acyls	Eicosanoids	M-H
metab_22188	265.148	6.61913	Lauryl sulfate	-	-	-	-	C12H26O4S	-	-	-	-	-	-	-	-		-	-	-	M-H
metab_22189	243.196	6.61913	2-Hydroxymyristic Acid	LMFA01050484;HMDB0002261	2-Hydroxymyristic acid	244.204	2507-55-3	C14H28O3	-	-	-	-	-	-	-	-		Lipids and lipid-like molecules	Fatty Acyls	Fatty acids and conjugates	M-H
metab_22192	697.229	6.61275	Brachynoside	-	-	-	-	C31H40O15	-	-	-	-	-	-	-	-		-	-	-	M+FA-H
metab_22232	429.3	6.59227	Hecogenin	HMDB0038824;LMST01080014	Hypoletin 8-gentiobioside	626.148	-	C27H42O4	C08902	Hecogenin	-	-	-	-	-	-		Phenylpropanoids and polyketides	Flavonoids	Flavonoid glycosides	M-H
metab_22237	386.197	6.58832	Guan-fu base Y	-	-	-	-	C22H29NO5	-	-	-	-	-	-	-	-		-	-	-	M-H
metab_22285	174.055	6.56155	Actrarit	-	-	-	-	C10H11NO3	-	-	-	-	-	-	-	-		-	-	-	M-H2O-H
metab_22290	401.254	6.55758	Lagochilin	-	-	-	-	C20H36O5	-	-	-	-	-	-	-	-		-	-	-	M+FA-H
metab_22291	378.264	6.55758	PGF2a ethanolamide	HMDB0013628	PGF2a ethanolamide	397.283	-	C22H39NO5	C13828	8,11,14-Eicosatrienoylethanolamide;N-(8Z,11Z,14Z-Eicosatrienoyl)-ethanolamine	-	-	-	-	-	-		Lipids and lipid-like molecules	Fatty Acyls	Eicosanoids	M-H2O-H
metab_22293	315.253	6.55758	Heptadecanoic acid	HMDB0006210;HMDB0006497;LMFA01010017;HMDB0002259;MJDBWX000002402	Heptadecanoyl carnitine;Heptadecanoyl CoA;Heptadecanoic acid	413.350508997;1019.360524011;270.255880332	506-12-7	C17H34O2	-	-	-	-	-	-	-	-		Lipids and lipid-like molecules	Fatty Acyls	Fatty acid esters	M+FA-H
metab_22316	235.17	6.55015	Tridecanoic acid	HMDB0000910;LMFA01010013;MJDBOTE0000603	Tridecanoic acid	214.193	638-53-9	C13H26O2	C17076	Tridecanoic acid	-	-	-	-	-	-		Lipids and lipid-like molecules	Fatty Acyls	Fatty acids and conjugates	M+Na-2H
metab_22334	384.275	6.54287	Oleoyl glycine	HMDB0013631	Oleoyl glycine	339.277	2601-90-3	C20H37NO3	-	-	-	-	-	-	-	-		Organic acids and derivatives	Carboxylic acids and derivatives	Amino acids, peptides, and analogues	M+FA-H
metab_22346	459.311	6.53297	Delta4-Dafachronic acid	-	-	-	-	C27H42O3	C21076	Delta4-Dafachronic acid;(25S),26-3-Keto-4-cholestenoic acid;(25S)-Delta4-Dafachronic acid;(25S)-3-Oxocholest-4-en-26-oate	-	-	-	-	-	-		-	-	-	M+FA-H
metab_22355	408.275	6.52777	20-HETE ethanolamide	HMDB0013630	20-HETE ethanolamide	363.277	942069-11-6	C22H37NO3	-	-	-	-	-	-	-	-		Organic nitrogen compounds	Organonitrogen compounds	Amines	M+FA-H
metab_22359	267.196	6.52777	Alpha-Bisabolol	;MJDBOTE0000731			-	C15H26O	-	-	-	-	-	-	-	-		-	-	-	M+FA-H
metab_22382	153.091	6.5139	3,5,5-Trimethyl-1,2-cyclohexanedione	HMDB0036177	3,5,5-Trimethyl-1,2-cyclohexanedione	154.099	57696-89-6	C9H14O2	-	-	-	-	-	-	-	-		Organic oxygen compounds	Organooxygen compounds	Carbonyl compounds	M-H
metab_22430	311.223	6.48118	(卤)13-HpODE	-	-	-	-	C18H32O4	-	-	-	-	-	-	-	-		-	-	-	M-H
metab_22444	243.102	6.4782	Austricine	-	-	-	-	C15H18O4	-	-	-	-	-	-	-	-		-	-	-	M-H2O-H
metab_22449	522.3	6.4723	Phosphatidylcholine lyso 20:5	-	-	-	-	C28H48NO7P	-	-	-	-	-	-	-	-		-	-	-	M-H2O-H
metab_22455	283.024	6.4723	Methyl 7-Deshydroxypyrogallin-4-Carboxylate	-	-	-	-	C13H10O6	-	-	-	-	-	-	-	-		-	-	-	M+Na-2H
metab_22481	449.221	6.458	Strophanthidin	LMST01120005			-	C23H32O6	C19988	Strophanthidin;Corchoside A aglycon	-	-	-	-	-	-		-	-	-	M+FA-H
metab_22486	349.002	6.458	[5,7-dihydroxy-2-(3-hydroxyphenyl)-4-oxo-3,4-dihydro-2H-1-benzopyran-3-yl]oxidanesulfonic acid	HMDB0125288	[5,7-dihydroxy-2-(3-hydroxyphenyl)-4-oxo-3,4-dihydro-2H-1-benzopyran-3-yl]oxidanesulfonic acid	368.02	-	C15H12O9S	-	-	-	-	-	-	-	-		Phenylpropanoids and polyketides	Flavonoids	Sulfated flavonoids	M-H2O-H
metab_22495	373.168	6.455	1,7-bis(3,4-dihydroxyphenyl)heptan-3-yl acetate	-	-	-	-	C21H26O6	-	-	-	-	-	-	-	-		-	-	-	M-H
metab_22502	569.223	6.45072	Mascaroside	HMDB0035603	Mascaroside	524.226	55465-97-9	C26H36O11	C09132	Mascaroside	-	-	-	-	-	-		Organoheterocyclic compounds	Naphthofurans	Not Available	M+FA-H
metab_22520	236.105	6.44435	N-alpha-(tert-Butoxycarbonyl)-L-histidine	-	-	-	-	C11H17N3O4	-	-	-	-	-	-	-	-		-	-	-	M-H2O-H
metab_22527	361.202	6.4399	Cortisol	LMST02030001;HMDB0000063	Cortisol	362.209	50-23-7	C21H30O5	C00735	Cortisol;Hydrocortisone;11beta,17alpha,21-Trihydroxy-4-pregnene-3,20-dione;Kendall's compound F;Reichstein's substance M	Steroids;Hormones and transmitters	21-Carbon atoms;Steroid hormones	map01100	Metabolic pathways	Metabolism	Global and overview maps		Lipids and lipid-like molecules	Steroids and steroid derivatives	Hydroxysteroids	M-H
metab_22544	593.13	6.42955	Kaempferol-3-O-glucoside-2''-p-coumaroyl	-	-	-	-	C30H26O13	-	-	-	-	-	-	-	-		-	-	-	M-H
metab_22547	297.113	6.42955	(2R,3R,4S,5S,6R)-2-[(Z)-hex-3-enoxy]-6-(hydroxymethyl)oxane-3,4,5-triol	-	-	-	-	C12H22O6	-	-	-	-	-	-	-	-		-	-	-	M+Cl
metab_22570	158.06	6.41717	Indole-3-acetaldehyde	HMDB0001190	Indoleacetaldehyde	159.068	2591-98-2	C10H9NO	C00637	Indole-3-acetaldehyde;2-(Indol-3-yl)acetaldehyde;Indoleacetaldehyde	-	-	map01100;map00380	Metabolic pathways; Tryptophan metabolism	Metabolism;Metabolism	Global and overview maps;Amino acid metabolism		Organoheterocyclic compounds	Indoles and derivatives	Indoles	M-H
metab_22603	341.139	6.3996	Propentofylline	-	-	-	-	C15H22N4O3	-	-	-	-	-	-	-	-		-	-	-	M+Cl
metab_22611	465.321	6.39468	TetraHCA	HMDB0062534	TetraHCA	466.329	-	C27H46O6	-	-	-	-	-	-	-	-		Lipids and lipid-like molecules	Steroids and steroid derivatives	Bile acids, alcohols and derivatives	M-H
metab_22621	755.443	6.38855	PA(18:1(11Z)/20:5(5Z,8Z,11Z,14Z,17Z))	HMDB0114911	PA(18:1(11Z)/20:5(5Z,8Z,11Z,14Z,17Z))	720.473	-	C41H69O8P	-	-	-	-	-	-	-	-		Lipids and lipid-like molecules	Glycerophospholipids	Glycerophosphates	M+Cl
metab_22633	327.217	6.38855	(10E,15Z)-9,12,13-trihydroxyoctadeca-10,15-dienoic acid	HMDB0035919	Corchorifatty acid F	328.225	95341-44-9	C18H32O5	-	-	-	-	-	-	-	-		Lipids and lipid-like molecules	Fatty Acyls	Lineolic acids and derivatives	M-H
metab_22654	517.265	6.37675	Blumenol C O-[rhamnosyl-(1->6)-glucoside]	HMDB0031935	Blumenol C O-[rhamnosyl-(1|right|6)-glucoside]	518.273	177261-67-5	C25H42O11	-	-	-	-	-	-	-	-		Lipids and lipid-like molecules	Fatty Acyls	Fatty acyl glycosides	M-H
metab_22656	361.178	6.37675	Perindoprilat	HMDB0060574	Perindoprilat	340.2	-	C17H28N2O5	C21517	Perindoprilat	-	-	-	-	-	-		Organic acids and derivatives	Carboxylic acids and derivatives	Amino acids, peptides, and analogues	M+Na-2H
metab_22663	391.212	6.37037	TxB2	LMFA03030002;HMDB0003252	Thromboxane B2	370.236	-	C20H34O6	C05963	Thromboxane B2;TXB2	Lipids	Eicosanoids	map00590;map01100	Arachidonic acid metabolism; Metabolic pathways	Metabolism;Metabolism	Lipid metabolism;Global and overview maps		Lipids and lipid-like molecules	Fatty Acyls	Eicosanoids	M+Na-2H
metab_22668	291.033	6.37037	(2-oxo-1,2-diphenylethoxy)sulfonic acid	HMDB0135190	(2-oxo-1,2-diphenylethoxy)sulfonic acid	292.041	-	C14H12O5S	-	-	-	-	-	-	-	-		Phenylpropanoids and polyketides	Stilbenes	Benzoins	M-H
metab_22669	269.045	6.37037	Apigenin	HMDB0002124;LMPK12110005	Apigenin	270.053	520-36-5	C15H10O5	C01477	Apigenin;4',5,7-Trihydroxyflavone;5,7,4'-Trihydroxyflavone	-	-	map01100;map00943;map00941;map01110;map00944	Metabolic pathways; Isoflavonoid biosynthesis; Flavonoid biosynthesis; Biosynthesis of secondary metabolites; Flavone and flavonol biosynthesis	Metabolism;Metabolism;Metabolism;Metabolism;Metabolism	Global and overview maps;Biosynthesis of other secondary metabolites;Biosynthesis of other secondary metabolites;Global and overview maps;Biosynthesis of other secondary metabolites		Phenylpropanoids and polyketides	Flavonoids	Flavones	M-H
metab_22679	345.061	6.36688	3,5,7-trihydroxy-2-(1-hydroxy-5-methoxy-4-oxocyclohex-2-en-1-yl)-6-methoxy-4H-chromen-4-one	HMDB0128766	3,5,7-trihydroxy-2-(1-hydroxy-5-methoxy-4-oxocyclohex-2-en-1-yl)-6-methoxy-4H-chromen-4-one	364.079	-	C17H16O9	-	-	-	-	-	-	-	-		Organoheterocyclic compounds	Benzopyrans	1-benzopyrans	M-H2O-H
metab_22700	457.244	6.35598	Grayanotoxin	-	-	-	-	C22H36O7	-	-	-	-	-	-	-	-		-	-	-	M+FA-H
metab_22719	507.114	6.3501	Peonidin-3-O-beta-galactoside	-	-	-	-	C22H22O11	-	-	-	-	-	-	-	-		-	-	-	M+FA-H
metab_22737	277.155	6.34395	Leucyl-phenylalanine	HMDB0013243	鈥婰eucylphenylalanine	278.163	-	C15H22N2O3	-	-	-	-	-	-	-	-		Organic acids and derivatives	Carboxylic acids and derivatives	Amino acids, peptides, and analogues	M-H
metab_22758	701.282	6.33448	Phenylalanyl-Tyrosine	HMDB0029007	Phenylalanyltyrosine	328.142	-	C18H20N2O4	-	-	-	-	-	-	-	-		Organic acids and derivatives	Carboxylic acids and derivatives	Amino acids, peptides, and analogues	2M+FA-H
metab_22770	679.197	6.32955	3'-Ketolactose	HMDB0001030	3'-Ketolactose	340.101	15990-62-2	C12H20O11	C05403	3-Ketolactose	-	-	-	-	-	-		Organic oxygen compounds	Organooxygen compounds	Carbohydrates and carbohydrate conjugates	2M-H
metab_22777	315.051	6.32955	Isorhamnetin	LMPK12110002;HMDB0002655	Isorhamnetin	316.058	480-19-3	C16H12O7	C10084	Isorhamnetin;3-Methylquercetin;Quercetin 3'-methyl ether	-	-	-	-	-	-		Phenylpropanoids and polyketides	Flavonoids	Flavones	M-H
metab_22790	237.113	6.32575	5-(hydroxymethyl)-3-(1-hydroxy-4-methylpentyl)oxolan-2-one	-	-	-	-	C11H20O4	-	-	-	-	-	-	-	-		-	-	-	M+Na-2H
metab_22834	427.067	6.30193	Oleoside	-	-	-	-	C16H22O11	-	-	-	-	-	-	-	-		-	-	-	M+K-2H
metab_22839	199.133	6.30193	Terpinen-4-ol	HMDB0035833;MJDBOTE0000295	p-Menth-1-en-4-ol	154.136	562-74-3	C10H18O	C17073	Terpineol-4;Terpinen-4-ol	-	-	-	-	-	-		Lipids and lipid-like molecules	Prenol lipids	Monoterpenoids	M+FA-H
metab_22840	177.019	6.30193	7,8-Dihydroxycoumarin	-	-	-	-	C9H6O4	C03093	7,8-Dihydroxycoumarin;Daphnetin	-	-	-	-	-	-		-	-	-	M-H
metab_22842	571.219	6.29722	3-Hydroxy-beta-ionol 3-[glucosyl-(1->6)-glucoside]	HMDB0037527	3-Hydroxy-beta-ionol 3-[glucosyl-(1|right|6)-glucoside]	534.268	137606-56-5	C25H42O12	-	-	-	-	-	-	-	-		Lipids and lipid-like molecules	Prenol lipids	Terpene glycosides	M+K-2H
metab_22848	181.086	6.29722	Alpha-Carboxy-delta-nonalactone	HMDB0030990	alpha-Carboxy-delta-nonalactone	200.105	-	C10H16O4	-	-	-	-	-	-	-	-		Organoheterocyclic compounds	Lactones	Delta valerolactones	M-H2O-H
metab_22863	329.139	6.28827	Onopordopicrin	-	-	-	-	C19H24O6	C09520	Onopordopicrin	-	-	-	-	-	-		-	-	-	M-H2O-H
metab_22869	617.281	6.28333	Verimol I	HMDB0035071	Verimol I	206.094	53484-54-1	C12H14O3	-	-	-	-	-	-	-	-		Benzenoids	Phenol ethers	Anisoles	3M-H
metab_22886	339.123	6.27808	Zearalenone	HMDB0031752;LMPK04000016;MJDBOTE0001201	(S,E)-Zearalenone	318.147	17924-92-4	C18H22O5	C09981	Zearalenone	-	-	-	-	-	-		Phenylpropanoids and polyketides	Macrolides and analogues	Zearalenones	M+Na-2H
metab_22902	307.072	6.27218	Indarubicin	-	-	-	-	C16H10N2O2	-	-	-	-	-	-	-	-		-	-	-	M+FA-H
metab_22979	187.063	6.23593	2,5-Diethyl-3-methylpyrazine	HMDB0036132	2,5-Diethyl-3-methylpyrazine	150.116	32736-91-7	C9H14N2	-	-	-	-	-	-	-	-		Organoheterocyclic compounds	Diazines	Pyrazines	M+K-2H
metab_23006	273.171	6.22095	11-Hydroxy-9-tridecenoic acid	HMDB0035881;LMFA01050437	11-Hydroxy-9-tridecenoic acid	228.173	105798-56-9	C13H24O3	-	-	-	-	-	-	-	-		Lipids and lipid-like molecules	Fatty Acyls	Fatty acids and conjugates	M+FA-H
metab_23027	243.16	6.21448	1,11-Undecanedicarboxylic acid	HMDB0002327	1,11-Undecanedicarboxylic acid	244.167	505-52-2	C13H24O4	-	-	-	-	-	-	-	-		Lipids and lipid-like molecules	Fatty Acyls	Fatty acids and conjugates	M-H
metab_23074	247.155	6.16883	2-Hydroxyundecanoate	HMDB0059736	2-Hydroxyundecanoate	202.157	-	C11H22O3	-	-	-	-	-	-	-	-		Lipids and lipid-like molecules	Fatty Acyls	Fatty acids and conjugates	M+FA-H
metab_23088	391.197	6.15898	Octaethylene glycol	HMDB0094680	Octaethylene glycol	370.22	-	C16H34O9	-	-	-	-	-	-	-	-		Organic oxygen compounds	Organooxygen compounds	Ethers	M+Na-2H
metab_23096	447.093	6.1451	Kaempferol-3-O-glucoside	HMDB0037429	Astragalin	448.101	-	C21H20O11	C12249	Kaempferol 3-O-glucoside;Kaempferol 3-O-beta-D-glucoside;Astragalin	-	-	map01110;map00944	Biosynthesis of secondary metabolites; Flavone and flavonol biosynthesis	Metabolism;Metabolism	Global and overview maps;Biosynthesis of other secondary metabolites		Phenylpropanoids and polyketides	Flavonoids	Flavonoid glycosides	M-H
metab_23098	345.061	6.14172	Skimmin	-	-	-	-	C15H16O8	-	-	-	-	-	-	-	-		-	-	-	M+Na-2H
metab_23108	162.031	6.13525	DL-4-Hydroxyphenyllactic acid	-	-	-	-	C9H9O4-	-	-	-	-	-	-	-	-		-	-	-	M-H2O-H
metab_23109	785.215	6.13187	Kaempferol-3-O-galactoside-6''-rhamnoside-3'''-rha	-	-	-	-	C33H40O19	-	-	-	-	-	-	-	-		-	-	-	M+FA-H
metab_23111	179.071	6.13187	(5E,8Z)-4,7-dihydroxy-2-methyl-2,3,4,7-tetrahydrooxecin-10-one	-	-	-	-	C10H14O4	-	-	-	-	-	-	-	-		-	-	-	M-H2O-H
metab_23115	229.155	6.12873	Valyl-Isoleucine	HMDB0029130	Valylisoleucine	230.163	-	C11H22N2O3	-	-	-	-	-	-	-	-		Organic acids and derivatives	Carboxylic acids and derivatives	Amino acids, peptides, and analogues	M-H
metab_23138	305.124	6.10098	1-(1-hydroxybutyl)-1,3,4,5,6,7-hexahydro-2-benzofuran-4,5,6,7-tetrol	-	-	-	-	C12H20O6	-	-	-	-	-	-	-	-		-	-	-	M+FA-H
metab_23147	349.186	6.09402	Trans-p-Menthane-1,7,8-triol 8-glucoside	HMDB0034784	trans-p-Menthane-1,7,8-triol 8-glucoside	350.194	217962-29-3	C16H30O8	-	-	-	-	-	-	-	-		Organic oxygen compounds	Organooxygen compounds	Carbohydrates and carbohydrate conjugates	M-H
metab_23162	329.03	6.07467	Aureol	HMDB0037921;LMPK12090039	Aureol	284.032	88478-03-9	C15H8O6	-	-	-	-	-	-	-	-		Phenylpropanoids and polyketides	Isoflavonoids	Coumestans	M+FA-H
metab_23163	609.146	6.07152	Quercetin-3-O-rutinoside	-	-	-	-	C27H30O16	-	-	-	-	-	-	-	-		-	-	-	M-H
metab_23199	387.108	6.0185	4-Hydroxy-2-(hydroxymethyl)phenyl 2-O-benzoyl-beta-D-glucopyranoside	-	-	-	-	C20H22O9	-	-	-	-	-	-	-	-		-	-	-	M-H2O-H
metab_23203	311.098	6.01193	Serotinose	HMDB0029897	Serotinose	312.106	534-98-5	C11H20O10	-	-	-	-	-	-	-	-		Organic oxygen compounds	Organooxygen compounds	Carbohydrates and carbohydrate conjugates	M-H
metab_23213	195.066	5.9986	ACETOSYRINGONE	-	-	-	-	C10H12O4	C10664	Acetosyringone	-	-	-	-	-	-		-	-	-	M-H
metab_23215	443.062	5.99215	Kaempferol-3-O-glucuronoside	-	-	-	-	C21H18O12	-	-	-	-	-	-	-	-		-	-	-	M-H2O-H
metab_23243	325.093	5.92255	MJPW00081	;MJPW00081			-	C15H18O8	-	-	-	-	-	-	-	-		-	-	-	M-H
metab_23275	259.155	5.8166	MJPW00127	;MJPW00127			-	C12H22O3	-	-	-	-	-	-	-	-		-	-	-	M+FA-H
metab_23295	209.081	5.73855	Sinapyl alcohol	HMDB0013070	Sinapyl alcohol	210.089	537-33-7	C11H14O4	C02325	Sinapyl alcohol;Sinapoyl alcohol	-	-	map01100;map00940;map01110	Metabolic pathways; Phenylpropanoid biosynthesis; Biosynthesis of secondary metabolites	Metabolism;Metabolism;Metabolism	Global and overview maps;Biosynthesis of other secondary metabolites;Global and overview maps		Benzenoids	Phenols	Methoxyphenols	M-H
metab_23301	347.171	5.70132	2-Propylglutaric acid	HMDB0060684	2-Propylglutaric acid	174.089	-	C8H14O4	C16658	2-Propylglutaric acid;2-PGA	-	-	-	-	-	-		Lipids and lipid-like molecules	Fatty Acyls	Fatty acids and conjugates	2M-H
metab_23329	165.055	5.6095	ISOPEONOL	-	-	-	-	C9H10O3	-	-	-	-	-	-	-	-		-	-	-	M-H
metab_23335	263.129	5.58568	Gamma-CEHC	HMDB0001931	gamma-CEHC	264.136	178167-75-4	C15H20O4	-	-	-	-	-	-	-	-		Organoheterocyclic compounds	Benzopyrans	1-benzopyrans	M-H
metab_23348	324.108	5.51867	Niazirin	HMDB0032807	Niazirin	279.111	122001-32-5	C14H17NO5	-	-	-	-	-	-	-	-		Organic oxygen compounds	Organooxygen compounds	Carbohydrates and carbohydrate conjugates	M+FA-H
metab_23353	187.097	5.50237	Azelaic acid	LMFA01170054;HMDB0000784	Azelaic acid	188.105	123-99-9	C9H16O4	C08261	Azelaic acid;Nonanedioic acid;1,7-Heptanedicarboxylic acid	-	-	-	-	-	-		Lipids and lipid-like molecules	Fatty Acyls	Fatty acids and conjugates	M-H
metab_23414	227.129	5.27722	Traumatic Acid	HMDB0000933;LMFA01170002	Traumatic acid	228.136	6402-36-4	C12H20O4	C16308	Traumatic acid;(2E)-Dodecenedioic acid;Dodec-2-enedioic acid	-	-	map00592;map01110	alpha-Linolenic acid metabolism; Biosynthesis of secondary metabolites	Metabolism;Metabolism	Lipid metabolism;Global and overview maps		Lipids and lipid-like molecules	Fatty Acyls	Fatty acids and conjugates	M-H
metab_23419	209.045	5.2586	Hydroxy Ferulic Acid	-	-	-	-	C10H10O5	-	-	-	-	-	-	-	-		-	-	-	M-H
metab_23450	263.092	5.14342	4,7,8-trimethoxy-3,5-dimethylchromen-2-one	-	-	-	-	C14H16O5	-	-	-	-	-	-	-	-		-	-	-	M-H
metab_23457	259.155	5.11628	3-Oxododecanoic acid	HMDB0010727	3-Oxododecanoic acid	214.157	-	C12H22O3	C02367	3-Oxododecanoic acid;3-Oxododecanoate	-	-	-	-	-	-		Organic acids and derivatives	Keto acids and derivatives	Medium-chain keto acids and derivatives	M+FA-H
metab_23487	209.081	4.99118	2-Phenylbutyric acid	HMDB0000329;HMDB0133617;MJDBOTE0000727	2-Phenylbutyric acid;2-methyl-3-phenylpropanoic acid	164.083729628;164.083729626	90-27-7	C10H12O2	-	-	-	-	-	-	-	-		Benzenoids	Benzene and substituted derivatives	Phenylpropanes	M+FA-H
metab_23503	441.176	4.93575	5-(4-methyl-5-oxo-2H-furan-3-yl)pentanoic acid	-	-	-	-	C10H14O4	-	-	-	-	-	-	-	-		-	-	-	2M+FA-H
metab_23513	223.061	4.90248	2-(2-acetyl-3-hydroxy-5-methoxyphenyl)acetic acid	-	-	-	-	C11H12O5	-	-	-	-	-	-	-	-		-	-	-	M-H
metab_23529	389.124	4.8261	Abruquinone	-	-	-	-	C20H22O8	-	-	-	-	-	-	-	-		-	-	-	M-H
metab_23558	217.976	4.67593	4-Nitrophenyl sulfate	HMDB0006492	4-Nitrophenyl sulfate	218.984	1080-04-2	C6H5NO6S	-	-	-	-	-	-	-	-		Organic acids and derivatives	Organic sulfuric acids and derivatives	Arylsulfates	M-H
metab_23566	206.082	4.6485	(2S)-2-acetamido-3-phenylpropanoic acid	HMDB0000512;MJDBWX000002314	N-Acetyl-L-phenylalanine	207.09	2018-61-3	C11H13NO3	C03519	N-Acetyl-L-phenylalanine	-	-	map01100;map00360	Metabolic pathways; Phenylalanine metabolism	Metabolism;Metabolism	Global and overview maps;Amino acid metabolism		Organic acids and derivatives	Carboxylic acids and derivatives	Amino acids, peptides, and analogues	M-H
metab_23567	389.124	4.6382	4-Hydroxy-2',3,4',6'-tetramethoxychalcone	-	-	-	-	C19H20O6	-	-	-	-	-	-	-	-		-	-	-	M+FA-H
metab_23580	398.131	4.56092	Reduced haloperidol	HMDB0060903	Reduced haloperidol	377.156	-	C21H25ClFNO2	-	-	-	-	-	-	-	-		Organoheterocyclic compounds	Piperidines	Phenylpiperidines	M+Na-2H
metab_23582	393.119	4.5543	2-[3-hydroxy-2-methoxy-4-(methoxymethyl)phenyl]-3,4-dihydro-2H-1-benzopyran-3,5,7-triol	HMDB0127865	2-[3-hydroxy-2-methoxy-4-(methoxymethyl)phenyl]-3,4-dihydro-2H-1-benzopyran-3,5,7-triol	348.121	-	C18H20O7	-	-	-	-	-	-	-	-		Phenylpropanoids and polyketides	Flavonoids	O-methylated flavonoids	M+FA-H
metab_23587	351.072	4.53655	Chlorogenoquinone	HMDB0029383	Chlorogenoquinone	352.079	24321-18-4	C16H16O9	-	-	-	-	-	-	-	-		Organic oxygen compounds	Organooxygen compounds	Alcohols and polyols	M-H
metab_23591	361.15	4.51338	Prenyl arabinosyl-(1->6)-glucoside	HMDB0041360	Prenyl arabinosyl-(1|right|6)-glucoside	380.168	175737-84-5	C16H28O10	-	-	-	-	-	-	-	-		Lipids and lipid-like molecules	Fatty Acyls	Fatty acyl glycosides	M-H2O-H
metab_23601	211.097	4.48387	(S)-(-)-Perillic acid	-	-	-	-	C10H14O2	-	-	-	-	-	-	-	-		-	-	-	M+FA-H
metab_23648	387.166	4.31905	Jasmolone glucoside	HMDB0032870	Jasmolone glucoside	342.168	-	C17H26O7	-	-	-	-	-	-	-	-		Organic oxygen compounds	Organooxygen compounds	Carbohydrates and carbohydrate conjugates	M+FA-H
metab_23651	367.103	4.31247	Feruloylquinic acid	HMDB0030669;HMDB0240478	3-Feruloylquinic acid;5-Feruloylquinic acid	368.110732238;368.110732238	-	C17H20O9	C02572	5-O-Feruloylquinic acid;O-Feruloylquinate;3-O-Feruloylquinic acid	-	-	-	-	-	-		Organic oxygen compounds	Organooxygen compounds	Alcohols and polyols	M-H
metab_23677	353.145	4.21318	Isopropyl apiosylglucoside	HMDB0041513	Isopropyl apiosylglucoside	354.153	147742-24-3	C14H26O10	-	-	-	-	-	-	-	-		Organic oxygen compounds	Organooxygen compounds	Carbohydrates and carbohydrate conjugates	M-H
metab_23679	213.124	4.209	Valyl-Proline	HMDB0029135	Valylproline	214.132	-	C10H18N2O3	-	-	-	-	-	-	-	-		Organic acids and derivatives	Carboxylic acids and derivatives	Amino acids, peptides, and analogues	M-H
metab_23685	176.071	4.18568	N-Methyltyrosine	-	-	-	-	C10H13NO3	-	-	-	-	-	-	-	-		-	-	-	M-H2O-H
metab_23715	287.15	4.12885	(Z)-2-octylpent-2-enedioic acid	-	-	-	-	C13H22O4	-	-	-	-	-	-	-	-		-	-	-	M+FA-H
metab_23720	230.012	4.1091	Paracetamol sulfate	HMDB0059911	Paracetamol sulfate	231.02	10066-90-7	C8H9NO5S	-	-	-	-	-	-	-	-		Organic acids and derivatives	Organic sulfuric acids and derivatives	Arylsulfates	M-H
metab_23743	182.045	4.00735	4-Pyridoxic acid	HMDB0000017	4-Pyridoxic acid	183.053	82-82-6	C8H9NO4	C00847	4-Pyridoxate;4-Pyridoxic acid	-	-	map01100;map00750	Metabolic pathways; Vitamin B6 metabolism	Metabolism;Metabolism	Global and overview maps;Metabolism of cofactors and vitamins		Organoheterocyclic compounds	Pyridines and derivatives	Pyridinecarboxylic acids and derivatives	M-H
metab_23767	589.12	3.89692	Quercetin-3-O-pentosyl(1-2)acetylpentoside	-	-	-	-	C27H28O16	-	-	-	-	-	-	-	-		-	-	-	M-H2O-H
metab_23768	238.108	3.89692	(-)-Salsoline	HMDB0003626;HMDB0012469	(R)-N-Methylsalsolinol;(-)-Salsoline	193.110278729;193.110278729	89-31-6	C11H15NO2	C09640	(-)-Salsoline	-	-	-	-	-	-		Organoheterocyclic compounds	Tetrahydroisoquinolines	Not Available	M+FA-H
metab_23775	183.066	3.85978	Methyloxalacetic acid diethyl ester	HMDB0032306;MJDBOTE0000723	Diethyl oxalpropionate	202.084	-	C9H14O5	C04067	Diethyl 2-methyl-3-oxosuccinate;Diethyl oxalpropionate;Butanedioic acid, 2-methyl-3-oxo-, 1,4-diethyl ester	-	-	-	-	-	-		Organic acids and derivatives	Keto acids and derivatives	Beta-keto acids and derivatives	M-H2O-H
metab_23778	164.071	3.85318	L-Phenylalanine	HMDB0000159	L-Phenylalanine	165.079	63-91-2	C9H11NO2	C00079	L-Phenylalanine;(S)-alpha-Amino-beta-phenylpropionic acid	Peptides	Amino acids	map01100;map01110;map00970;map01210;map00960;map02010;map00998;map01230;map00966;map00460;map00940;map00360;map00400	Metabolic pathways; Biosynthesis of secondary metabolites; Aminoacyl-tRNA biosynthesis; 2-Oxocarboxylic acid metabolism; Tropane, piperidine and pyridine alkaloid biosynthesis; ABC transporters; Biosynthesis of various secondary metabolites - part 2; Biosynthesis of amino acids; Glucosinolate biosynthesis; Cyanoamino acid metabolism; Phenylpropanoid biosynthesis; Phenylalanine metabolism; Phenyla…	Metabolism;Metabolism;Genetic Information Processing;Metabolism;Metabolism;Environmental Information Processing;Metabolism;Metabolism;Metabolism;Metabolism;Metabolism;Metabolism;Metabolism	Global and overview maps;Global and overview maps;Translation;Global and overview maps;Biosynthesis of other secondary metabolites;Membrane transport;Biosynthesis of other secondary metabolites;Global and overview maps;Biosynthesis of other secondary metabolites;Metabolism of other amino acids;Biosynthesis of other secondary metabolites;Amino acid metabolism;Amino acid metabolism		Organic acids and derivatives	Carboxylic acids and derivatives	Amino acids, peptides, and analogues	M-H
metab_23795	191.055	3.79745	Quinic acid	HMDB0042004;HMDB0003072	Quinaldine;Quinic acid	143.073499293;192.063388116	77-95-2	C7H12O6	C00296	Quinate;Quinic acid;Kinic acid;Chinic acid;L-Quinic acid;L-Quinate;(-)-Quinic acid	-	-	map01100;map00400	Metabolic pathways; Phenylalanine, tyrosine and tryptophan biosynthesis	Metabolism;Metabolism	Global and overview maps;Amino acid metabolism		Organoheterocyclic compounds	Quinolines and derivatives	Not Available	M-H
metab_23798	221.093	3.79093	Glycyl-phenylalanine	HMDB0028848	Glycyl-Phenylalanine	222.1	-	C11H14N2O3	-	-	-	-	-	-	-	-		Organic acids and derivatives	Carboxylic acids and derivatives	Amino acids, peptides, and analogues	M-H
metab_23801	231.135	3.78438	Threoninyl-Isoleucine	HMDB0029064	Threonylisoleucine	232.142	-	C10H20N2O4	-	-	-	-	-	-	-	-		Organic acids and derivatives	Carboxylic acids and derivatives	Amino acids, peptides, and analogues	M-H
metab_23804	213.113	3.77445	2,2'-(3-methylcyclohexane-1,1-diyl)diacetic acid	-	-	-	-	C11H18O4	-	-	-	-	-	-	-	-		-	-	-	M-H
metab_23811	373.113	3.75485	Shanzhiside	-	-	-	-	C16H24O11	C17066	Shanzhiside	-	-	-	-	-	-		-	-	-	M-H2O-H
metab_23826	413.166	3.69845	(2S)-2-Butanol O-[b-D-Apiofuranosyl-(1->6)-b-D-glucopyranoside]	HMDB0041255	(2S)-2-Butanol O-[b-D-Apiofuranosyl-(1|right|6)-b-D-glucopyranoside]	368.168	-	C15H28O10	-	-	-	-	-	-	-	-		Organic oxygen compounds	Organooxygen compounds	Carbohydrates and carbohydrate conjugates	M+FA-H
metab_23827	186.113	3.69513	3-(2-amino-2-oxoethyl)-5-methyl-hexanoic acid	-	-	-	-	C9H17NO3	-	-	-	-	-	-	-	-		-	-	-	M-H
metab_23833	449.202	3.6756	Pisumionoside	HMDB0039947	Pisumionoside	404.205	371113-06-3	C19H32O9	-	-	-	-	-	-	-	-		Lipids and lipid-like molecules	Prenol lipids	Terpene glycosides	M+FA-H
metab_23836	139.003	3.63295	Zymonic acid	HMDB0031210	Zymonic acid	158.022	24891-71-2	C6H6O5	-	-	-	-	-	-	-	-		Organoheterocyclic compounds	Dihydrofurans	Furanones	M-H2O-H
metab_23843	349.161	3.60647	(2S)-2-[(1S)-1-carboxyundecyl]-5-oxooxolane-2-carboxylic acid	-	-	-	-	C17H28O6	-	-	-	-	-	-	-	-		-	-	-	M+Na-2H
metab_23854	195.066	3.54842	Ethyl vanillate	-	-	-	-	C10H12O4	-	-	-	-	-	-	-	-		-	-	-	M-H
metab_23857	327.108	3.54515	Methyl 3-(3,4-dihydroxy-5-phenyloxolan-2-yl)-3-hydroxypropanoate	-	-	-	-	C14H18O6	-	-	-	-	-	-	-	-		-	-	-	M+FA-H
metab_23872	139.076	3.47352	2-Methylpropyl 3-oxobutanoate	HMDB0036395	2-Methylpropyl 3-oxobutanoate	158.094	7779-75-1	C8H14O3	-	-	-	-	-	-	-	-		Organic acids and derivatives	Keto acids and derivatives	Beta-keto acids and derivatives	M-H2O-H
metab_23873	221.103	3.4702	(2R,3S,4S,5R,6R)-2-(hydroxymethyl)-6-propan-2-yloxyoxane-3,4,5-triol	-	-	-	-	C9H18O6	-	-	-	-	-	-	-	-		-	-	-	M-H
metab_23887	328.045	3.38872	CAMP	HMDB0000058	Cyclic AMP	329.053	-	C10H12N5O6P	C00575	3',5'-Cyclic AMP;Cyclic adenylic acid;Cyclic AMP;Adenosine 3',5'-phosphate;Adenosine 3',5'-cyclic phosphate;cAMP	Nucleic acids	Cyclic nucleotides	map01100;map00230	Metabolic pathways; Purine metabolism	Metabolism;Metabolism	Global and overview maps;Nucleotide metabolism		Nucleosides, nucleotides, and analogues	Purine nucleotides	Cyclic purine nucleotides	M-H
metab_23895	266.089	3.345	Deoxyguanosine	HMDB0000085	Deoxyguanosine	267.097	961-07-9	C10H13N5O4	C00330	Deoxyguanosine;2'-Deoxyguanosine	Nucleic acids	Nucleosides	map01100;map02010;map00230	Metabolic pathways; ABC transporters; Purine metabolism	Metabolism;Environmental Information Processing;Metabolism	Global and overview maps;Membrane transport;Nucleotide metabolism		Nucleosides, nucleotides, and analogues	Purine nucleosides	Purine 2'-deoxyribonucleosides	M-H
metab_23962	165.055	3.0772	3-Ethoxybenzoate	-	-	-	-	C9H10O3	C02363	3-Ethoxybenzoate;3-Ethoxybenzoic acid	-	-	-	-	-	-		-	-	-	M-H
metab_23968	193.05	3.05723	Scytalone	-	-	-	-	C10H10O4	C00779	Scytalone;3,4-Dihydro-3,6,8-trihydoroxy-1(2H)-napthalenone	-	-	-	-	-	-		-	-	-	M-H
metab_23984	202.108	3.00937	Tranexamic Acid	;MJDBOTE0000780			-	C8H15NO2	-	-	-	-	-	-	-	-		-	-	-	M+FA-H
metab_23986	388.124	3.00587	Casuarine 6-alpha-D-glucoside	HMDB0031999	Casuarine 6-alpha-D-glucoside	367.148	186795-20-0	C14H25NO10	-	-	-	-	-	-	-	-		Organic oxygen compounds	Organooxygen compounds	Carbohydrates and carbohydrate conjugates	M+Na-2H
metab_23995	161.024	2.96383	3-HYDROXYCOUMARIN	HMDB0002149	3 Hydroxycoumarin	162.032	-	C9H6O3	-	-	-	-	-	-	-	-		Phenylpropanoids and polyketides	Coumarins and derivatives	Hydroxycoumarins	M-H
metab_24012	325.107	2.90458	Lasepitin	-	-	-	-	C19H20O6	-	-	-	-	-	-	-	-		-	-	-	M-H2O-H
metab_24014	503.14	2.8949	6-({2-[4,6-dihydroxy-2-methoxy-3-(3-methylbut-2-en-1-yl)phenyl]-2-hydroxyacetyl}oxy)-3,4,5-trihydroxyoxane-2-carboxylic acid	HMDB0125506	6-({2-[4,6-dihydroxy-2-methoxy-3-(3-methylbut-2-en-1-yl)phenyl]-2-hydroxyacetyl}oxy)-3,4,5-trihydroxyoxane-2-carboxylic acid	458.142	-	C20H26O12	-	-	-	-	-	-	-	-		Organic oxygen compounds	Organooxygen compounds	Carbohydrates and carbohydrate conjugates	M+FA-H
metab_24034	217.119	2.74958	Serylisoleucine	HMDB0029042	Serylisoleucine	218.127	91086-51-0	C9H18N2O4	-	-	-	-	-	-	-	-		Organic acids and derivatives	Carboxylic acids and derivatives	Amino acids, peptides, and analogues	M-H
metab_24045	980.315	2.70587	Maltododecaose	HMDB0059956	Maltododecaose	1962.64	-	C72H122O61	-	-	-	-	-	-	-	-		Organic Polymers	Polysaccharides	Not Available	M-2H
metab_24049	263.056	2.68892	4-methylumbelliferyl acetate	HMDB0032989	4-Methylumbelliferyl acetate	218.058	2747-05-09	C12H10O4	C03837	4-Methylumbelliferyl acetate	-	-	-	-	-	-		Phenylpropanoids and polyketides	Coumarins and derivatives	Not Available	M+FA-H
metab_24067	737.236	2.6224	Maltononaose	HMDB0013001	Maltononaose	1476.49	6471-60-9	C54H92O46	-	-	-	-	-	-	-	-		Organic oxygen compounds	Organooxygen compounds	Carbohydrates and carbohydrate conjugates	M-2H
metab_24068	185.081	2.61925	Gabapentin Related Compound	-	-	-	-	C9H14O4	-	-	-	-	-	-	-	-		-	-	-	M-H
metab_24081	241.108	2.52077	Hexyl 2-furoate	HMDB0037725	Hexyl 2-furoate	196.11	39251-86-0	C11H16O3	-	-	-	-	-	-	-	-		Organoheterocyclic compounds	Furans	Furoic acid and derivatives	M+FA-H
metab_24102	169.013	2.44045	Gallic acid	HMDB0005807	Gallic acid	170.022	149-91-7	C7H6O5	C01424	Gallate;Gallic acid;3,4,5-Trihydroxybenzoic acid;3,4,5-Trihydroxybenzoate;Pyrogallol-5-carboxylic acid	-	-	-	-	-	-		Benzenoids	Benzene and substituted derivatives	Benzoic acids and derivatives	M-H
metab_24123	131.07	2.30592	2-Ethyl-2-Hydroxybutyric acid	HMDB0001975	2-Ethyl-2-Hydroxybutyric acid	132.079	3639-21-2	C6H12O3	-	-	-	-	-	-	-	-		Lipids and lipid-like molecules	Fatty Acyls	Fatty acids and conjugates	M-H
metab_24134	200.056	2.23272	(3S,4R,5S,6R)-3-amino-6-(hydroxymethyl)oxane-2,4,5-triol	;MJDBWX000002235			-	C6H13NO5	-	-	-	-	-	-	-	-		-	-	-	M+Na-2H
metab_24135	110.024	2.23272	L-Pyroglutamic acid	HMDB0000267	Pyroglutamic acid	129.043	-	C5H7NO3	C01879	5-Oxoproline;Pidolic acid;Pyroglutamic acid;5-Pyrrolidone-2-carboxylic acid;Pyroglutamate;5-Oxo-L-proline;L-Pyroglutamic acid;L-5-Pyrrolidone-2-carboxylic acid	Peptides	Amino acids	map01100;map00480	Metabolic pathways; Glutathione metabolism	Metabolism;Metabolism	Global and overview maps;Metabolism of other amino acids		Organic acids and derivatives	Carboxylic acids and derivatives	Amino acids, peptides, and analogues	M-H2O-H
metab_24136	292.14	2.22293	N-(1-Deoxy-1-fructosyl)leucine	HMDB0037840	N-(1-Deoxy-1-fructosyl)leucine	293.147	34393-18-5	C12H23NO7	-	-	-	-	-	-	-	-		Organic acids and derivatives	Carboxylic acids and derivatives	Amino acids, peptides, and analogues	M-H
metab_24177	150.041	1.76313	Guanine	HMDB0000132;MJDBOTE0000457	Guanine	151.049	73-40-5	C5H5N5O	C00242	Guanine;2-Amino-6-hydroxypurine	Nucleic acids	Bases	map01100;map00230	Metabolic pathways; Purine metabolism	Metabolism;Metabolism	Global and overview maps;Nucleotide metabolism		Organoheterocyclic compounds	Imidazopyrimidines	Purines and purine derivatives	M-H
metab_24213	341.087	1.50793	[3,4,5-trihydroxy-6-(hydroxymethyl)oxan-2-yl] 3-hydroxy-4,5-dimethoxybenzoate	-	-	-	-	C15H20O10	-	-	-	-	-	-	-	-		-	-	-	M-H2O-H
metab_24288	305.018	1.10835	Uridine-5-Monophosphate	-	-	-	-	C9H13N2O9P	-	-	-	-	-	-	-	-		-	-	-	M-H2O-H
metab_24289	675.235	1.10507	Icariin	LMPK12112009			-	C33H40O15	C17555	Icariin	-	-	-	-	-	-		-	-	-	M-H
metab_24290	171.065	1.10507	1,4-Cyclohexanedicarboxylic acid	-	-	-	-	C8H12O4	-	-	-	-	-	-	-	-		-	-	-	M-H
metab_24339	267.095	0.92695	L-beta-aspartyl-L-leucine	HMDB0011166	L-beta-aspartyl-L-leucine	246.122	-	C10H18N2O5	-	-	-	-	-	-	-	-		Organic acids and derivatives	Peptidomimetics	Hybrid peptides	M+Na-2H
metab_24380	123.008	0.827267	Kojic acid	HMDB0032923	Kojic acid	142.027	501-30-4	C6H6O4	C14516	Kojic acid;5-Hydroxy-2-(hydroxymethyl)-4-pyrone	-	-	-	-	-	-		Organoheterocyclic compounds	Pyrans	Pyranones and derivatives	M-H2O-H
metab_24391	139.003	0.80345	Cis-4-Carboxymethylenebut-2-en-4-olide	HMDB0060459	cis-4-Carboxymethylenebut-2-en-4-olide	140.011	-	C6H4O4	C04431	cis-4-Carboxymethylenebut-2-en-4-olide;4-Carboxymethylenebut-2-en-4-olide	-	-	-	-	-	-		Organoheterocyclic compounds	Dihydrofurans	Furanones	M-H
metab_24393	827.267	0.799167	Verbascose	-	-	-	-	C30H52O26	C08252	Verbascose;beta-D-Fructofuranosyl O-alpha-D-galactopyranosyl-(1-6)-O-alpha-D-galactopyranosyl-(1-6)-O-alpha-D-galactopyranosyl-(1-6)-alpha-D-glucopyranoside	-	-	-	-	-	-		-	-	-	M-H
metab_24396	101.023	0.799167	4-oxobutanoic acid	HMDB0001259;MJDBWX000002089	Succinic acid semialdehyde	102.032	692-29-5	C4H6O3	C00232	Succinate semialdehyde;Succinic semialdehyde;4-Oxobutanoate	Organic acids	Carboxylic acids	map01100;map00760;map01200;map00250;map00350;map00650;map00750	Metabolic pathways; Nicotinate and nicotinamide metabolism; Carbon metabolism; Alanine, aspartate and glutamate metabolism; Tyrosine metabolism; Butanoate metabolism; Vitamin B6 metabolism	Metabolism;Metabolism;Metabolism;Metabolism;Metabolism;Metabolism;Metabolism	Global and overview maps;Metabolism of cofactors and vitamins;Global and overview maps;Amino acid metabolism;Amino acid metabolism;Carbohydrate metabolism;Metabolism of cofactors and vitamins		Lipids and lipid-like molecules	Fatty Acyls	Fatty acids and conjugates	M-H
metab_24397	656.209	0.794717	Maltooctaose	HMDB0059935	Maltooctaose	1314.43	-	C48H82O41	-	-	-	-	-	-	-	-		Organic oxygen compounds	Organooxygen compounds	Carbohydrates and carbohydrate conjugates	M-2H
metab_24409	665.214	0.78385	Stachyose	HMDB0003553	Stachyose	666.222	470-55-3	C24H42O21	C01613	Stachyose	-	-	map01100;map00052	Metabolic pathways; Galactose metabolism	Metabolism;Metabolism	Global and overview maps;Carbohydrate metabolism		Organic oxygen compounds	Organooxygen compounds	Carbohydrates and carbohydrate conjugates	M-H
metab_24430	377.085	0.77015	Gentiobiose	-	-	-	-	C12H22O11	C08240	Gentiobiose	Carbohydrates	Oligosaccharides	-	-	-	-		-	-	-	M+Cl
metab_24438	215.114	0.77015	Nalpha-Acetyl-L-arginine	-	-	-	-	C8H16N4O3	-	-	-	-	-	-	-	-		-	-	-	M-H
metab_24456	231.098	0.763367	Threoninyl-Hydroxyproline	HMDB0029062	Threonylhydroxyproline	232.106	-	C9H16N2O5	-	-	-	-	-	-	-	-		Organic acids and derivatives	Carboxylic acids and derivatives	Amino acids, peptides, and analogues	M-H
metab_24464	147.065	0.763367	Isovaleric acid	HMDB0000718;LMFA01020181	Isovaleric acid	102.068	503-74-2	C5H10O2	C08262	3-Methylbutanoic acid;Isovaleric acid;Isovalerate	-	-	map01110	Biosynthesis of secondary metabolites	Metabolism	Global and overview maps		Lipids and lipid-like molecules	Fatty Acyls	Fatty acids and conjugates	M+FA-H
metab_24474	256.093	0.7565	Gamma-Glutamylglutamine	HMDB0011738;HMDB0029147	N2-gamma-Glutamylglutamine;N-gamma-Glutamylglutamine	275.111735291;275.111735279	-	C10H17N3O6	C05283	(5-L-Glutamyl)-L-glutamine	-	-	-	-	-	-		Organic acids and derivatives	Carboxylic acids and derivatives	Amino acids, peptides, and analogues	M-H2O-H
metab_24487	232.082	0.749633	Muramic acid	HMDB0003254	Muramic acid	251.101	1114-41-6	C9H17NO7	C06470	Muramic acid;3-O-alpha-Carboxyethyl-D-glucosamine;2-Amino-3-O-[(R)-1-carboxyethyl]-2-deoxy-D-glucopyranose	Carbohydrates	Monosaccharides	-	-	-	-		Organic oxygen compounds	Organooxygen compounds	Carbohydrates and carbohydrate conjugates	M-H2O-H
metab_24495	433.157	0.745667	D-Pinitol	HMDB0034219;MJDBOTE0000955	D-Pinitol	194.079	10284-63-6	C7H14O6	C03844	D-Pinitol;1D-3-O-Methyl-chiro-inositol;5D-5-O-Methyl-chiro-inositol	-	-	-	-	-	-		Organic oxygen compounds	Organooxygen compounds	Alcohols and polyols	2M+FA-H
metab_24496	379.065	0.745667	Palatinose	-	-	-	-	C12H22O11	C01742	Palatinose;Isomaltulose;6-O-alpha-D-Glucopyranosyl-D-fructofuranose	Carbohydrates	Oligosaccharides	-	-	-	-		-	-	-	M+K-2H
metab_24499	649.231	0.7388	5-hydroxy-8-(2-hydroxypropan-2-yl)-4-(prop-2-en-1-yl)-2H,8H,9H-furo[2,3-h]chromen-2-one	HMDB0130125	5-hydroxy-8-(2-hydroxypropan-2-yl)-4-(prop-2-en-1-yl)-2H,8H,9H-furo[2,3-h]chromen-2-one	302.115	-	C17H18O5	-	-	-	-	-	-	-	-		Phenylpropanoids and polyketides	Coumarins and derivatives	Furanocoumarins	2M+FA-H
metab_24506	230.066	0.7388	3-oxo-C4-homoserine lactone	-	-	-	-	C8H11NO4	-	-	-	-	-	-	-	-		-	-	-	M+FA-H
metab_24515	216.098	0.733883	Alanyl-Gamma-glutamate	HMDB0028701	Alanyl-Gamma-glutamate	217.106	-	C8H15N3O4	-	-	-	-	-	-	-	-		Organic acids and derivatives	Carboxylic acids and derivatives	Amino acids, peptides, and analogues	M-H
metab_24516	200.056	0.733883	O-Succinyl-L-homoserine	-	-	-	-	C8H13NO6	C01118	O-Succinyl-L-homoserine;O4-Succinyl-L-homoserine;O-Succinylhomoserine	-	-	map01100;map00270;map01110;map00920;map01230	Metabolic pathways; Cysteine and methionine metabolism; Biosynthesis of secondary metabolites; Sulfur metabolism; Biosynthesis of amino acids	Metabolism;Metabolism;Metabolism;Metabolism;Metabolism	Global and overview maps;Amino acid metabolism;Global and overview maps;Energy metabolism;Global and overview maps		-	-	-	M-H2O-H
metab_24518	170.045	0.733883	N-Ethylmaleimide (NEM)	;MJDBOTE0001664			-	C6H7NO2	-	-	-	-	-	-	-	-		-	-	-	M+FA-H
metab_24532	428.14	0.72405	N-Acetyllactosamine	HMDB0001542	N-Acetyllactosamine	383.143	32181-59-2	C14H25NO11	C00611	N-Acetyllactosamine;beta-D-Galactosyl-1,4-N-acetyl-D-glucosamine;beta-D-Galactosyl-1,4-N-acetyl-beta-D-glucosamine	-	-	-	-	-	-		Organic oxygen compounds	Organooxygen compounds	Carbohydrates and carbohydrate conjugates	M+FA-H
metab_24533	340.102	0.72405	Glutamylarginine	HMDB0028813	Glutamylarginine	303.154	7219-59-2	C11H21N5O5	-	-	-	-	-	-	-	-		Organic acids and derivatives	Carboxylic acids and derivatives	Amino acids, peptides, and analogues	M+K-2H
metab_24544	161.045	0.71815	D-Allose	HMDB0001151	Allose	180.063	-	C6H12O6	C01487	D-Allose	Carbohydrates	Monosaccharides	map01100;map02010;map00051	Metabolic pathways; ABC transporters; Fructose and mannose metabolism	Metabolism;Environmental Information Processing;Metabolism	Global and overview maps;Membrane transport;Carbohydrate metabolism		Organic oxygen compounds	Organooxygen compounds	Carbohydrates and carbohydrate conjugates	M-H2O-H
metab_24550	310.103	0.7118	Agaritinal	HMDB0040694	Agaritinal	265.106	114847-20-0	C12H15N3O4	-	-	-	-	-	-	-	-		Organic acids and derivatives	Carboxylic acids and derivatives	Amino acids, peptides, and analogues	M+FA-H
metab_24559	226.012	0.700533	N-Acetyl-L-glutamate	HMDB0001138	N-Acetyl-L-glutamic acid	189.064	1188-37-0	C7H11NO5	C00624	N-Acetyl-L-glutamate;N-Acetyl-L-glutamic acid	-	-	map01100;map01210;map00220;map01110;map01230	Metabolic pathways; 2-Oxocarboxylic acid metabolism; Arginine biosynthesis; Biosynthesis of secondary metabolites; Biosynthesis of amino acids	Metabolism;Metabolism;Metabolism;Metabolism;Metabolism	Global and overview maps;Global and overview maps;Amino acid metabolism;Global and overview maps;Global and overview maps		Organic acids and derivatives	Carboxylic acids and derivatives	Amino acids, peptides, and analogues	M+K-2H
metab_24564	168.033	0.697533	[2-(dimethylamino)ethoxy]sulfonic acid	HMDB0142542	[2-(dimethylamino)ethoxy]sulfonic acid	169.041	-	C4H11NO4S	-	-	-	-	-	-	-	-		Organic acids and derivatives	Organic sulfuric acids and derivatives	Sulfuric acid esters	M-H
metab_24565	157.036	0.697533	Allantoin	HMDB0000462	Allantoin	158.044	97-59-6	C4H6N4O3	C01551	Allantoin;5-Ureidohydantoin;Glyoxyldiureide	-	-	-	-	-	-		Organoheterocyclic compounds	Azoles	Imidazoles	M-H
metab_24578	231.109	0.686717	L-Acetopine	HMDB0039111	L-Acetopine	232.117	18416-86-9	C8H16N4O4	-	-	-	-	-	-	-	-		Organic acids and derivatives	Carboxylic acids and derivatives	Amino acids, peptides, and analogues	M-H
metab_24579	217.082	0.686717	H-Gly-Pro-OH	;MJDBOTE0001113			-	C7H12N2O3	-	-	-	-	-	-	-	-		-	-	-	M+FA-H
metab_24606	255.039	0.6723	Alanyl-Glutamic acid	HMDB0028686	Alanylglutamic acid	218.09	-	C8H14N2O5	-	-	-	-	-	-	-	-		Organic acids and derivatives	Carboxylic acids and derivatives	Amino acids, peptides, and analogues	M+K-2H
metab_24609	175.06	0.6723	2-Isopropylmalic acid	HMDB0000402	2-Isopropylmalic acid	176.068	49601-06-1	C7H12O5	C02504	alpha-Isopropylmalate;(2S)-2-Isopropylmalate;(2S)-2-Hydroxy-2-isopropylsuccinic acid;2-Isopropylmalic acid;3-Carboxy-3-hydroxy-4-methylpentanoate;3-Carboxy-3-hydroxyisocaproate	-	-	map01100;map01110;map00290;map01210;map00620;map01230	Metabolic pathways; Biosynthesis of secondary metabolites; Valine, leucine and isoleucine biosynthesis; 2-Oxocarboxylic acid metabolism; Pyruvate metabolism; Biosynthesis of amino acids	Metabolism;Metabolism;Metabolism;Metabolism;Metabolism;Metabolism	Global and overview maps;Global and overview maps;Amino acid metabolism;Global and overview maps;Carbohydrate metabolism;Global and overview maps		Lipids and lipid-like molecules	Fatty Acyls	Fatty acids and conjugates	M-H
metab_24617	209.066	0.665433	(3S,4R,5S,6S)-6-methyloxane-2,3,4,5-tetrol	HMDB0000174;MJDBWX000002167	L-Fucose	164.068	87-96-7	C6H12O5	C01019	6-Deoxy-L-galactose;L-Fucose	Carbohydrates	Monosaccharides	map01100;map00520;map00051	Metabolic pathways; Amino sugar and nucleotide sugar metabolism; Fructose and mannose metabolism	Metabolism;Metabolism;Metabolism	Global and overview maps;Carbohydrate metabolism;Carbohydrate metabolism		Organic oxygen compounds	Organooxygen compounds	Carbohydrates and carbohydrate conjugates	M+FA-H
metab_24622	228.027	0.660017	Calystegine C1	HMDB0031346	Calystegine C1	191.079	156705-04-3	C7H13NO5	-	-	-	-	-	-	-	-		Alkaloids and derivatives	Tropane alkaloids	Not Available	M+K-2H
metab_24627	138.019	0.660017	3-Hydroxypicolinic acid	HMDB0013188	3-Hydroxypicolinic acid	139.027	874-24-8	C6H5NO3	C18620	3-Hydroxypicolinic acid	-	-	-	-	-	-		Organoheterocyclic compounds	Pyridines and derivatives	Pyridinecarboxylic acids and derivatives	M-H
metab_24629	104.034	0.660017	L-Serine	HMDB0000187	L-Serine	105.043	56-45-1	C3H7NO3	C00065	L-Serine;L-2-Amino-3-hydroxypropionic acid;L-3-Hydroxy-alanine;Serine	Peptides	Amino acids	map01100;map00630;map01110;map00920;map01502;map00460;map00270;map01200;map01230;map00600;map02010;map00260;map00261;map00970	Metabolic pathways; Glyoxylate and dicarboxylate metabolism; Biosynthesis of secondary metabolites; Sulfur metabolism; Vancomycin resistance; Cyanoamino acid metabolism; Cysteine and methionine metabolism; Carbon metabolism; Biosynthesis of amino acids; Sphingolipid metabolism; ABC transporters; Glycine, serine and threonine metabolism; Monobactam biosynthesis; Aminoacyl-tRNA biosynthesis	Metabolism;Metabolism;Metabolism;Metabolism;Human Diseases;Metabolism;Metabolism;Metabolism;Metabolism;Metabolism;Environmental Information Processing;Metabolism;Metabolism;Genetic Information Processing	Global and overview maps;Carbohydrate metabolism;Global and overview maps;Energy metabolism;Drug resistance: antimicrobial;Metabolism of other amino acids;Amino acid metabolism;Global and overview maps;Global and overview maps;Lipid metabolism;Membrane transport;Amino acid metabolism;Biosynthesis of other secondary metabolites;Translation		Organic acids and derivatives	Carboxylic acids and derivatives	Amino acids, peptides, and analogues	M-H
metab_24639	247.022	0.65315	L-Galacto-2-heptulose	HMDB0029901	鈥婰-galacto-2-Heptulose	210.074	-	C7H14O7	-	-	-	-	-	-	-	-		Organic oxygen compounds	Organooxygen compounds	Carbohydrates and carbohydrate conjugates	M+K-2H
metab_24678	233.006	0.6344	D-Gluconic acid	HMDB0000625	Gluconic acid	196.058	-	C6H12O7	C00257	D-Gluconic acid;D-Gluconate;D-gluco-Hexonic acid	Carbohydrates	Monosaccharides	map01100;map00030;map01110;map01200	Metabolic pathways; Pentose phosphate pathway; Biosynthesis of secondary metabolites; Carbon metabolism	Metabolism;Metabolism;Metabolism;Metabolism	Global and overview maps;Carbohydrate metabolism;Global and overview maps;Global and overview maps		Organic oxygen compounds	Organooxygen compounds	Carbohydrates and carbohydrate conjugates	M+K-2H
metab_24683	124.006	0.6344	Taurine	HMDB0000251	Taurine	125.015	107-35-7	C2H7NO3S	C00245	Taurine;2-Aminoethanesulfonic acid;Aminoethylsulfonic acid	-	-	map01100;map02010;map00920;map00430	Metabolic pathways; ABC transporters; Sulfur metabolism; Taurine and hypotaurine metabolism	Metabolism;Environmental Information Processing;Metabolism;Metabolism	Global and overview maps;Membrane transport;Energy metabolism;Metabolism of other amino acids		Organic acids and derivatives	Organic sulfonic acids and derivatives	Organosulfonic acids and derivatives	M-H
metab_24702	159.065	0.625483	3-Methyladipic acid	HMDB0000555	3-Methyladipic acid	160.074	3058-01-03	C7H12O4	-	-	-	-	-	-	-	-		Lipids and lipid-like molecules	Fatty Acyls	Fatty acids and conjugates	M-H
metab_24707	312.06	0.618617	Glu-Gln	HMDB0028817	Glutamylglutamine	275.112	-	C10H17N3O6	-	-	-	-	-	-	-	-		Organic acids and derivatives	Carboxylic acids and derivatives	Amino acids, peptides, and analogues	M+K-2H
metab_24709	245.043	0.618617	Haematommic Acid, Ethyl Ester	-	-	-	-	C11H12O5	-	-	-	-	-	-	-	-		-	-	-	M+Na-2H
metab_24720	303.12	0.614233	(4E)-8-hydroxy-4-(1-hydroxypropan-2-ylidene)-10-oxatricyclo[7.2.1.0	-	-	-	-	C15H22O5	-	-	-	-	-	-	-	-		-	-	-	M+Na-2H
metab_24723	262.056	0.614233	Lycoperdic acid	HMDB0030417	Lycoperdic acid	217.059	69086-72-2	C8H11NO6	-	-	-	-	-	-	-	-		Organic acids and derivatives	Carboxylic acids and derivatives	Amino acids, peptides, and analogues	M+FA-H
metab_24730	501.146	0.60785	2'-deoxyuridine	HMDB0000012;MJDBOTE0000510	Deoxyuridine	228.075	951-78-0	C9H12N2O5	C00526	Deoxyuridine;2-Deoxyuridine;2'-Deoxyuridine	Nucleic acids	Nucleosides	map00240;map01100;map02010	Pyrimidine metabolism; Metabolic pathways; ABC transporters	Metabolism;Metabolism;Environmental Information Processing	Nucleotide metabolism;Global and overview maps;Membrane transport		Nucleosides, nucleotides, and analogues	Pyrimidine nucleosides	Pyrimidine 2'-deoxyribonucleosides	2M+FA-H
metab_24731	395.099	0.60785	Swertiamarin	;MJDBOTE0000976			-	C16H22O10	C09800	Swertiamarin	-	-	-	-	-	-		-	-	-	M+Na-2H
metab_24733	257.078	0.60785	Glu-Glu	HMDB0028818	Glutamylglutamic acid	276.096	3929-61-1	C10H16N2O7	C01425	Glutamyl-glutamic acid;L-alpha-Glutamyl-L-glutamic acid;Glu-Glu	-	-	-	-	-	-		Organic acids and derivatives	Carboxylic acids and derivatives	Amino acids, peptides, and analogues	M-H2O-H
metab_24742	218.066	0.60325	Oxaceprol	HMDB0000725;MJDBOTE0001679	4-Hydroxyproline	131.058	-	C7H11NO4	C01157	Hydroxyproline;L-Hydroxyproline;trans-4-Hydroxy-L-proline	Peptides	Amino acids	map01100;map02010;map00330	Metabolic pathways; ABC transporters; Arginine and proline metabolism	Metabolism;Environmental Information Processing;Metabolism	Global and overview maps;Membrane transport;Amino acid metabolism		Organic acids and derivatives	Carboxylic acids and derivatives	Amino acids, peptides, and analogues	M+FA-H
metab_24748	275.125	0.5993	Saccharopine	HMDB0000279	Saccharopine	276.132	997-68-2	C11H20N2O6	C00449	N6-(L-1,3-Dicarboxypropyl)-L-lysine;Saccharopine;L-Saccharopine;N-[(S)-5-Amino-5-carboxypentyl]-L-glutamic acid	-	-	map01100;map00310;map01110;map00300;map01230	Metabolic pathways; Lysine degradation; Biosynthesis of secondary metabolites; Lysine biosynthesis; Biosynthesis of amino acids	Metabolism;Metabolism;Metabolism;Metabolism;Metabolism	Global and overview maps;Amino acid metabolism;Global and overview maps;Amino acid metabolism;Global and overview maps		Organic acids and derivatives	Carboxylic acids and derivatives	Amino acids, peptides, and analogues	M-H
metab_24756	132.029	0.593567	L-Aspartic Acid	HMDB0000191	L-Aspartic acid	133.038	56-84-8	C4H7NO4	C00049	L-Aspartate;L-Aspartic acid;2-Aminosuccinic acid;L-Asp	Peptides;Hormones and transmitters	Amino acids;Neurotransmitters	map01100;map00220;map01110;map00770;map00300;map00760;map01210;map00270;map01200;map00260;map01230;map00460;map00250;map00710;map00970;map00261;map02010;map00410;map00340	Metabolic pathways; Arginine biosynthesis; Biosynthesis of secondary metabolites; Pantothenate and CoA biosynthesis; Lysine biosynthesis; Nicotinate and nicotinamide metabolism; 2-Oxocarboxylic acid metabolism; Cysteine and methionine metabolism; Carbon metabolism; Glycine, serine and threonine metabolism; Biosynthesis of amino acids; Cyanoamino acid metabolism; Alanine, aspartate and glutamate m…	Metabolism;Metabolism;Metabolism;Metabolism;Metabolism;Metabolism;Metabolism;Metabolism;Metabolism;Metabolism;Metabolism;Metabolism;Metabolism;Metabolism;Genetic Information Processing;Metabolism;Environmental Information Processing;Metabolism;Metabolism	Global and overview maps;Amino acid metabolism;Global and overview maps;Metabolism of cofactors and vitamins;Amino acid metabolism;Metabolism of cofactors and vitamins;Global and overview maps;Amino acid metabolism;Global and overview maps;Amino acid metabolism;Global and overview maps;Metabolism of other amino acids;Amino acid metabolism;Energy metabolism;Translation;Biosynthesis of other second…		Organic acids and derivatives	Carboxylic acids and derivatives	Amino acids, peptides, and analogues	M-H
metab_24762	615.109	0.5745	Apigenin-7-O-neohesperidoside	-	-	-	-	C27H30O14	-	-	-	-	-	-	-	-		-	-	-	M+K-2H
metab_24763	353.072	0.5745	D-Erythroascorbic acid 1'-a-D-glucoside	HMDB0033627	D-Erythroascorbic acid 1'-a-D-glucoside	308.074	174339-86-7	C11H16O10	-	-	-	-	-	-	-	-		Organic oxygen compounds	Organooxygen compounds	Carbohydrates and carbohydrate conjugates	M+FA-H
metab_24766	174.04	0.5745	N-acetylaspartate	HMDB0000812	N-Acetyl-L-aspartic acid	175.048	-	C6H9NO5	C01042	N-Acetyl-L-aspartate;N-Acetyl-L-aspartic acid	-	-	map01100;map00250	Metabolic pathways; Alanine, aspartate and glutamate metabolism	Metabolism;Metabolism	Global and overview maps;Amino acid metabolism		Organic acids and derivatives	Carboxylic acids and derivatives	Amino acids, peptides, and analogues	M-H
metab_24768	137.023	0.5745	P-Salicylic acid	HMDB0000500	4-Hydroxybenzoic acid	138.032	-	C7H6O3	C00156	4-Hydroxybenzoate;Hydroxybenzoic acid;4-Hydroxybenzoic acid;Hydroxybenzenecarboxylic acid	-	-	map01100;map00130;map01110;map00790	Metabolic pathways; Ubiquinone and other terpenoid-quinone biosynthesis; Biosynthesis of secondary metabolites; Folate biosynthesis	Metabolism;Metabolism;Metabolism;Metabolism	Global and overview maps;Metabolism of cofactors and vitamins;Global and overview maps;Metabolism of cofactors and vitamins		Benzenoids	Benzene and substituted derivatives	Benzoic acids and derivatives	M-H
metab_24770	445.087	0.56975	Nodakenin	;MJDBOTE0001273			-	C20H24O9	C09279	Nodakenin	-	-	-	-	-	-		-	-	-	M+K-2H
metab_24771	292.923	0.56975	Phosphoric acid	HMDB0001429	Phosphate	97.9769	14265-44-2	H3O4P	C00009	Orthophosphate;Phosphate;Phosphoric acid;Orthophosphoric acid	-	-	map00195;map02010;map00190	Photosynthesis; ABC transporters; Oxidative phosphorylation	Metabolism;Environmental Information Processing;Metabolism	Energy metabolism;Membrane transport;Energy metabolism		Homogeneous non-metal compounds	Non-metal oxoanionic compounds	Non-metal phosphates	3M-H
metab_24784	176.935	0.559833	Pyrophosphate	HMDB0000250	Pyrophosphate	177.943	14000-31-8	H4O7P2	C00013	Diphosphate;Diphosphoric acid;Pyrophosphate;Pyrophosphoric acid;PPi	-	-	map00190	Oxidative phosphorylation	Metabolism	Energy metabolism		Homogeneous non-metal compounds	Non-metal oxoanionic compounds	Non-metal pyrophosphates	M-H
metab_24785	168.98	0.559833	(S)-3-Sulfonatolactate	HMDB0060176	(S)-3-Sulfonatolactate	169.989	-	C3H6O6S	C11499	(S)-3-Sulfolactate;(2S)-3-Sulfolactate	-	-	map01100;map00270	Metabolic pathways; Cysteine and methionine metabolism	Metabolism;Metabolism	Global and overview maps;Amino acid metabolism		Organic acids and derivatives	Hydroxy acids and derivatives	Alpha hydroxy acids and derivatives	M-H
metab_24821	163.039	2.05738	2-Hydroxycinnamic acid	HMDB0002641;HMDB0041592;HMDB0134028	2-Hydroxycinnamic acid;Coumarinic acid;3-(2-hydroxyphenyl)prop-2-enoic acid	164.047344122;164.047344122;164.047344118	614-60-8	C9H8O3	C01772;C05838	trans-2-Hydroxycinnamate;trans-2-Hydroxycinnamic acid;2-Hydroxycinnamate;2-Coumaric acid;o-Coumaric acid;2-Coumarate;cis-2-Hydroxycinnamate;2-Coumarinate	-	-	map01100;map00940;map01110;map00360	Metabolic pathways; Phenylpropanoid biosynthesis; Biosynthesis of secondary metabolites; Phenylalanine metabolism	Metabolism;Metabolism;Metabolism;Metabolism	Global and overview maps;Biosynthesis of other secondary metabolites;Global and overview maps;Amino acid metabolism		Phenylpropanoids and polyketides	Cinnamic acids and derivatives	Hydroxycinnamic acids and derivatives	M-H
metab_24822	138.019	3.3854	4-Nitrophenol	HMDB0001232;HMDB0041950	4-Nitrophenol;Nitrobenzene	139.026943031;123.032028409	100-02-7	C6H5NO3	C00870	4-Nitrophenol;p-Nitrophenol;PNP;Niphen;4-Hydroxynitrobenzene	-	-	-	-	-	-		Benzenoids	Phenols	Nitrophenols	M-H
metab_24823	429.337	8.11057	7-Dehydrocholesterol	HMDB0000876;HMDB0000032;LMST01010069;MJDBOTE0000505	Vitamin D3;7-Dehydrocholesterol	384.33921603;384.33921603	434-16-2	C27H44O	C01164	7-Dehydrocholesterol;Provitamin D3;Cholesta-5,7-dien-3beta-ol	Steroids	27-Carbon atoms	map01100;map01110;map00100	Metabolic pathways; Biosynthesis of secondary metabolites; Steroid biosynthesis	Metabolism;Metabolism;Metabolism	Global and overview maps;Global and overview maps;Lipid metabolism		Lipids and lipid-like molecules	Steroids and steroid derivatives	Vitamin D and derivatives	M+FA-H
metab_24824	173.008	0.51465	Aconitic acid	HMDB0000072;HMDB0000958	cis-Aconitic acid;trans-Aconitic acid	174.016437924;174.016437924	-	C6H6O6	C00417;C02341	cis-Aconitate;cis-Aconitic acid;trans-Aconitate;trans-Aconitic acid	Organic acids	Carboxylic acids	map01100;map00630;map01110;map01210;map00020;map00660	Metabolic pathways; Glyoxylate and dicarboxylate metabolism; Biosynthesis of secondary metabolites; 2-Oxocarboxylic acid metabolism; Citrate cycle (TCA cycle); C5-Branched dibasic acid metabolism	Metabolism;Metabolism;Metabolism;Metabolism;Metabolism;Metabolism	Global and overview maps;Carbohydrate metabolism;Global and overview maps;Global and overview maps;Carbohydrate metabolism;Carbohydrate metabolism		Organic acids and derivatives	Carboxylic acids and derivatives	Tricarboxylic acids and derivatives	M-H2O-H, M-H
metab_24825	437.177	0.60325	Cortisone	LMST02030090;HMDB0002802;HMDB0015459;MJDBOTE0000813	Cortisone;Cortisone acetate	360.193674006;402.204238692	1953-06-05	C23H30O6	C08173	Cortisone acetate;Cortisyl	-	-	-	-	-	-		Lipids and lipid-like molecules	Steroids and steroid derivatives	Hydroxysteroids	M+Cl
metab_24826	221.118	6.35598	Dehydrovomifoliol	HMDB0036819;LMPR0103050009	Dehydrovomifoliol	222.126	15764-81-5	C13H18O3	C02533	Dehydrovomifoliol;(6S)-6-Hydroxy-3-oxo-alpha-ionone	-	-	-	-	-	-		Lipids and lipid-like molecules	Prenol lipids	Sesquiterpenoids	M-H2O-H, M-H
metab_24827	547.203	5.51867	Deoxyadenosine	HMDB0000101;HMDB0000050	Deoxyadenosine;Adenosine	251.101839307;267.096753929	958-09-8	C10H13N5O3	C00212	Adenosine	Nucleic acids	Nucleosides	map01100;map02010;map00230	Metabolic pathways; ABC transporters; Purine metabolism	Metabolism;Environmental Information Processing;Metabolism	Global and overview maps;Membrane transport;Nucleotide metabolism		Nucleosides, nucleotides, and analogues	Purine nucleosides	Purine 2'-deoxyribonucleosides	2M+FA-H
metab_24828	181.071	0.665433	Dulcitol	HMDB0011632;HMDB0000107	L-Iditol;Galactitol	182.07903818;182.07903818	-	C6H14O6	C01697	Galactitol;Dulcitol;Dulcose	-	-	map01100;map00052	Metabolic pathways; Galactose metabolism	Metabolism;Metabolism	Global and overview maps;Carbohydrate metabolism		Organic oxygen compounds	Organooxygen compounds	Carbohydrates and carbohydrate conjugates	M+Cl, M+K-2H, M-H, M-H2O-H
metab_24829	191.019	0.518367	Isocitrate	HMDB0001874;HMDB0000193	D-threo-Isocitric acid;Isocitric acid	192.02700261;192.02700261	-	C6H8O7	C00311	Isocitrate;Isocitric acid;1-Hydroxytricarballylic acid;1-Hydroxypropane-1,2,3-tricarboxylic acid	Organic acids	Carboxylic acids	map01100;map00630;map01110;map01210;map01200;map01230;map00020	Metabolic pathways; Glyoxylate and dicarboxylate metabolism; Biosynthesis of secondary metabolites; 2-Oxocarboxylic acid metabolism; Carbon metabolism; Biosynthesis of amino acids; Citrate cycle (TCA cycle)	Metabolism;Metabolism;Metabolism;Metabolism;Metabolism;Metabolism;Metabolism	Global and overview maps;Carbohydrate metabolism;Global and overview maps;Global and overview maps;Global and overview maps;Global and overview maps;Carbohydrate metabolism		Organic acids and derivatives	Carboxylic acids and derivatives	Tricarboxylic acids and derivatives	M-H
metab_24830	203.053	0.6931	L-Rhamnose	HMDB0000849;HMDB0010207;MJDBOTE0001473	Rhamnose;L-Rhamnulose	164.068473494;164.068473494	-	C6H14O6	C00507	L-Rhamnose;6-Deoxy-L-mannose;L-Mannomethylose;L-Rhamnopyranose	Carbohydrates	Monosaccharides	map01100;map00051	Metabolic pathways; Fructose and mannose metabolism	Metabolism;Metabolism	Global and overview maps;Carbohydrate metabolism		Organic oxygen compounds	Organooxygen compounds	Carbohydrates and carbohydrate conjugates	M+Na-2H
metab_24831	219.029	5.75213	Lawsone	HMDB0030773;MJDBOTE0001328	Juglone	174.032	-	C10H6O3	C10368	Lawsone	-	-	-	-	-	-		Benzenoids	Naphthalenes	Naphthoquinones	M+FA-H
metab_24832	357.281	7.74808	Lithocholic acid	LMST04010003;HMDB0000717;HMDB0000761;MJDBDZS0000025	Isolithocholic acid;Lithocholic acid	376.297745146;376.297745146	434-13-9	C24H40O3	C03990	Lithocholic acid;Lithocholate;3alpha-Hydroxy-5beta-cholanate;3alpha-Hydroxy-5beta-cholanic acid	Steroids	24-Carbon atoms	-	-	-	-		Lipids and lipid-like molecules	Steroids and steroid derivatives	Bile acids, alcohols and derivatives	M-H2O-H
metab_24833	133.013	0.564033	Malic acid	HMDB0000156	Malic acid	134.022	97-67-6	C4H6O5	C00149	(S)-Malate;L-Malate;L-Apple acid;L-Malic acid;L-2-Hydroxybutanedioic acid;Malate;Malic acid	Organic acids	Carboxylic acids	map01100;map00630;map01110;map01200;map00620;map00710;map00020	Metabolic pathways; Glyoxylate and dicarboxylate metabolism; Biosynthesis of secondary metabolites; Carbon metabolism; Pyruvate metabolism; Carbon fixation in photosynthetic organisms; Citrate cycle (TCA cycle)	Metabolism;Metabolism;Metabolism;Metabolism;Metabolism;Metabolism;Metabolism	Global and overview maps;Carbohydrate metabolism;Global and overview maps;Global and overview maps;Carbohydrate metabolism;Energy metabolism;Carbohydrate metabolism		Organic acids and derivatives	Hydroxy acids and derivatives	Beta hydroxy acids and derivatives	M-H2O-H, M-H
metab_24834	300.049	0.559833	N-Acetyl-alpha-D-glucosamine 1-phosphate	HMDB0001367	N-Acetyl-glucosamine 1-phosphate	301.056	-	C8H16NO9P	C04501	N-Acetyl-alpha-D-glucosamine 1-phosphate	-	-	map01100;map00520	Metabolic pathways; Amino sugar and nucleotide sugar metabolism	Metabolism;Metabolism	Global and overview maps;Carbohydrate metabolism		Organic oxygen compounds	Organooxygen compounds	Carbohydrates and carbohydrate conjugates	M-H
metab_24835	266.088	0.625483	N-Acetylglucosamine	HMDB0000215;HMDB0000803	N-Acetyl-D-glucosamine;beta-N-Acetylglucosamine	221.089937217;221.089937217	-	C8H15NO6	C00140	N-Acetyl-D-glucosamine;N-Acetylchitosamine;2-Acetamido-2-deoxy-D-glucose;GlcNAc	Carbohydrates	Monosaccharides	map01100;map00520;map02010	Metabolic pathways; Amino sugar and nucleotide sugar metabolism; ABC transporters	Metabolism;Metabolism;Environmental Information Processing	Global and overview maps;Carbohydrate metabolism;Membrane transport		Organic oxygen compounds	Organooxygen compounds	Carbohydrates and carbohydrate conjugates	M+FA-H
metab_24836	308.098	0.5993	N-Acetylneuraminic acid	HMDB0000773;HMDB0000230	N-Acetyl-a-neuraminic acid;N-Acetylneuraminic acid	309.105981211;309.105981211	19342-33-7;21646-00-4	C11H19NO9	C00270	N-Acetylneuraminate;N-Acetylneuraminic acid;5-Acetamido-3,5-dideoxy-D-glycero-D-galacto-2-nonulosonic acid;Neu5Ac	Carbohydrates	Monosaccharides	map01100;map00520	Metabolic pathways; Amino sugar and nucleotide sugar metabolism	Metabolism;Metabolism	Global and overview maps;Carbohydrate metabolism		Organic oxygen compounds	Organooxygen compounds	Carbohydrates and carbohydrate conjugates	M-H
metab_24837	187.108	3.21695	Ne-Acetyllysine	HMDB0000206;HMDB0000197	N6-Acetyl-L-lysine;Indoleacetic acid	188.116092388;175.063328537	-	C8H16N2O3	C02727	N6-Acetyl-L-lysine	-	-	map01100;map00310	Metabolic pathways; Lysine degradation	Metabolism;Metabolism	Global and overview maps;Amino acid metabolism		Organic acids and derivatives	Carboxylic acids and derivatives	Amino acids, peptides, and analogues	M-H
metab_24838	503.161	1.36215	Panose	HMDB0011729;HMDB0029937	1-Kestose;Panose	504.169034976;504.169034976	33401-87-5	C18H32O16	C00713	Panose	-	-	-	-	-	-		Organic oxygen compounds	Organooxygen compounds	Carbohydrates and carbohydrate conjugates	M-H
metab_24839	341.139	6.29298	Zearalenol	HMDB0041824;HMDB0041838	alpha-Zearalenol;beta-Zearalenol	320.162373878;320.162373878	-	C18H24O5	C14750;C14751	alpha-Zearalenol;trans-Zearalenol;beta-Zearalenol;beta-trans-Zearalenol	-	-	-	-	-	-		Phenylpropanoids and polyketides	Macrolides and analogues	Not Available	M+Na-2H
metab_24840	321.17	6.38217	Zeranol	HMDB0041824;HMDB0032702	alpha-Zearalenol;Zeranol	320.162373878;322.178023942	26538-44-3;36455-72-8	C18H26O5	C14752	alpha-Zearalanol;Zeranol	-	-	-	-	-	-		Phenylpropanoids and polyketides	Macrolides and analogues	Not Available	M-H
