# Supplementary material for: Untargeted Metabolomics Reveals Multiple Phytometabolites in the Agricultural Waste Materials and Medicinal Materials of Codonopsis pilosula
Source: Front Plant Sci. 2022 Jan 10;12:814011. doi: 10.3389/fpls.2021.814011 (PMC8784785; doi:10.3389/fpls.2021.814011)
Supplement: Supplementary file 6 [file Table_3.xlsx]

## Sheet: Table S3
Table S3 Phytometabolites in Codonopsis pilosula from metabolomics data
No.	Metabolites	Exact Mass	Formula	Pubchem_CID	ID_pos_ [M+H]+	m/z	Fold_change	ID_neg_[M-H]-	m/z	Fold_change
Polyacetylenes, polyenes and their glycosides
1	lobetyolin	396.178	C20H28O8	53486204	metab_11753	397.185		metab_16032	395.171
2	lobetyolinin	558.231	C26H38O13	5459227				metab_16311/metab_23175	557.223
3	lobetyol	234.126	C14H18O3	5807986	metab_599/metab_2560/metab_2797/metab_5068/metab_6240/metab_10051/metab_12673	235.133	metab_2797: 1.2929;	metab_22726/metab_16790	233.118
4	9-(tetrahydropyran-2-yl)-non-trans-2,8-diene-4,6-diyn-1-ol	216.115	C14H16O2					metab_16716	215.107
5	Pilosulyne A	252.136	C14H20O4		metab_5853	253.143	metab_5853: 1.3038;	metab_18580/metab_18105	251.129
6	Pilosulyne B	250.12	C14H18O4		metab_11267	251.127		metab_18285/metab_23071	249.113
7	Pilosulyne C	236.141	C14H20O3		metab_204/metab_342/metab_6465	237.148	metab_204: 1.2445; metab_342: 1.2512;	metab_22708/metab_22909	235.134
8	Pilosulyne E	452.256	C28H36O5
9	Pilosulyne D	396.178	C20H28O8		metab_11753	397.185		metab_16032	395.171
10	Pilosulyne F	254.152	C14H22O4		metab_2670/metab_5383	255.159	metab_2670: 1.5662;	metab_19148/metab_18513	253.143
11	Pilosulyne G	252.136	C14H20O4		metab_5853	253.143	metab_5853: 1.3038;
12	9-(tetrahydropyran-2-yl)-non-trans-8-ene-4,6-yn-l-ol	218.131	C14H18O2		metab_607/metab_629/metab_2833/metab_2870/metab_2917/metab_5417/metab_6230/metab_7683	219.138	metab_7683: 1.4303;
13	Codonopilodiynoside A	396.178	C20H28O8		metab_11753	397.185		metab_16032	395.171
14	Codonopilodiynoside B	558.231	C26H38O13					metab_16311/metab_23175	557.223
15	Codonopilodiynoside C	558.231	C26H38O13					metab_16311/metab_23175	557.223
16	Codonopilodiynoside D	398.194	C20H30O8		metab_12357	399.202		metab_18481	397.186	metab_18481: 1.2386;
17	Codonopilodiynoside E	542.236	C26H38O12		metab_70	543.241		metab_22437	541.228	metab_22437: 0.7814;
18	Codonopilodiynoside F	542.236	C26H38O12		metab_70	543.241		metab_22437	541.228	metab_22437: 0.7814;
19	Codonopilodiynoside G	542.236	C26H38O12		metab_70	543.241		metab_22437	541.228	metab_22437: 0.7814;
20	tetradeca-4E,8E,12E-triene-10-yne-1,6,7-triol	236.141	C14H20O3		metab_204/metab_342/metab_6465	237.148	metab_204: 1.2445; metab_342: 1.2512;	metab_22708/metab_22909	235.134
21	Cordifolioidyne B	396.178	C20H28O8	24787197	metab_11753	397.185		metab_16032	395.171
22	Tangshenyne A	412.173	C20H28O9					metab_16257/metab_16263/metab_16247	411.166
23	Tangshenyne B	558.231	C26H38O13					metab_16311/metab_23175	557.223
Flavonoids and their glycosides
1	luteolin	286.048	C15H10O6	5280445				metab_22789	285.04
2	apigenin	270.053	C15H10O5	5280443	metab_2861/metab_6124/metab_6554/metab_12114	271.06	metab_6554: 1.5465; metab_2861: 1.4605; metab_12114: 1.2428; metab_6124: 1.6322;	metab_22669/metab_18355	269.045	metab_22669: 1.7432; metab_18355: 1.4388;
3	tricin	330.074	C17H14O7	5281702	metab_6575	331.08	metab_6575: 2.9246	metab_18654	329.066
4	chrysoeriol	300.063	C16H12O6	5280666	metab_1435/metab_6088/metab_6577/metab_11324/metab_11573/metab_11835	301.07	metab_11573: 1.6042; metab_6088: 1.4859; metab_6577: 1.4596; metab_11835: 1.4162; metab_11324: 1.3964;	metab_18652	299.056	metab_18652: 1.3962;
5	quercetin	302.043	C15H10O7	5280343	metab_12070/metab_12228	303.049
6	kaempferol	286.048	C15H10O6	5280863				metab_22789	285.04
7	wogonin	284.068	C16H12O5	5281703
8	5-hydroxy-4',6,7-trimethoxy flavone	328.095	C18H16O6	161271	metab_2889/metab_11338	329.101	metab_2889: 1.3633; metab_11338: 1.3301;
9	5-hydroxy-4',7-dimethoxy flavone	298.084	C17H14O5	5281601	metab_11066	299.091	metab_11066: 1.312;
10	apigenin-7-O-β-D-glucopyranoside	432.106	C21H20O10	5280704	metab_2862/metab_5846/metab_6122	433.112	metab_5846: 17.8039; metab_6122: 1.4676; metab_2862: 1.3926;	metab_18212/metab_18595/metab_18433/metab_18352	431.098	metab_18433: 1.4355; metab_18352: 1.4232; metab_18212: 1.2117;
11	luteolin-7-O-β-D-glucopyranoside	448.101	C21H20O11	5280637	metab_319/metab_5248/metab_5900/metab_11520/metab_11638	449.107	metab_5248: 2.6148; metab_319: 1.3571; metab_11638: 1.5737; metab_11520: 1.2751 metab_5900: 1.2006	metab_23096	447.093	metab_23096: 1.2588
12	luteolin-5-O-β-D-glucopyranoside	448.101	C21H20O11	5317471	metab_319/metab_5248/metab_5900/metab_11520/metab_11638	449.107	metab_5248: 2.6148; metab_319: 1.3571; metab_11638: 1.5737; metab_11520: 1.2751 metab_5900: 1.2006	metab_23096	447.093	metab_23096: 1.2588
13	luteolin-7-rutinoside	594.158	C27H30O15	44258082	metab_1295/metab_2878	595.165	metab_2878: 2.4183	metab_18484/metab_17857	593.151	metab_17857: 1.4959; metab_18484: 1.3802;
14	luteolin-7-galactoside	448.101	C21H20O11	5291488	metab_319/metab_5248/metab_5900/metab_11520/metab_11638	449.107	metab_5248: 2.6148; metab_319: 1.3571; metab_11638: 1.5737; metab_11520: 1.2751 metab_5900: 1.2006	metab_23096	447.093	metab_23096: 1.2588
15	tectoridin	462.116	C22H22O11	5281810	metab_2830/metab_11567/metab_12033	463.123	metab_12033: 1.3907; metab_2830: 1.3447; metab_11567: 1.2229;	metab_22721/metab_23146	461.108	metab_22721: 1.5907; metab_23146: 1.3517;
16	cynaroside	448.101	C21H20O11	5280637	metab_319/metab_5248/metab_5900/metab_11520/metab_11638	449.107	metab_5248: 2.6148; metab_319: 1.3571; metab_11638: 1.5737; metab_11520: 1.2751 metab_5900: 1.2006	metab_23096	447.093	metab_23096: 1.2588
17	luteolin-7-O-β-D-glucopyranosyl-(1→6)-[(6′’’-O-caffeoyl)-β-D-glucopyranoside]	772.185	C36H36O19
18	luteolin-7-O-D-gentibioside	610.153	C27H30O16		metab_5651/metab_5875/metab_11579/metab_12235/metab_12683/metab_13057	611.16	metab_13057: 1.859 metab_5651: 1.4984; metab_5875: 1.2305;	metab_18332/metab_23163/metab_16219	609.146	metab_6124: 1.6322; metab_18332: 1.6023; metab_23163: 1.4356;
19	luteolin-7-O-[(6′’’-caffeoyl)-β-D-glucopyranosyl-(1→6)]-β-D-glucopyranoside	772.185	C36H36O19
20	5,7,3′,5′-tetrahydroxy-flavone-7-O-β-D-glucopyranoside	438.116	C20H22O11					metab_16408/metab_19334	437.107
21	neokurarinol	470.23	C27H34O7	102090469				metab_22512	469.221	metab_22512: 0.6613;
Coumarins
1	angelicin	186.032	C11H6O3	10658				metab_24595	185.021
2	psoralen	186.032	C11H6O3	6199				metab_24595	185.021
Lignans and their glycosides
1	tangshenoside I	678.237	C29H42O18	6441191				metab_18139/metab_18197	677.23	metab_18139: 0.7131; metab_18197: 0.6948;
2	tangshenoside I-methyl ester	690.237	C30H42O18
3	tangshenoside II	372.142	C17H24O9	5321613	metab_5680/metab_5832	373.146
4	tangshenoside III	726.273	C34H46O17	11968970				metab_18357/metab_18302	725.266	metab_18357: 0.8107; metab_18302: 0.8085;
5	tangshenoside IV	1018.35	C45H62O26	102056192
6	tangshenoside V	470.142	C21H26O12		metab_5021	471.146	metab_5021: 0.8105;
7	tangshenoside VI
8	tangshenoside VIII	1032.37	C46H64O26	102103095				metab_18376	1031.36
9	codonoside A	824.274	C38H48O20					metab_23286/metab_23327/metab_18448	823.267	metab_18448: 0.829;
10	codonoside B	824.274	C38H48O20
11	codonopiloneolignanin A	384.157	C22H24O6		metab_51/metab_2555/metab_2922/metab_12093	385.164	metab_12093: 0.7092;
12	syringin	372.142	C17H24O9	5316860	metab_5680/metab_5832	373.146
13	3′,4′,5,9,9′-pentahydroxy-5,4,7′-epoxylignan
14	ethyl-syringin	364.173	C16H28O9					metab_23808/metab_17986	363.166	metab_17986: 1.3141;
15	syringaresinol	418.163	C22H26O8	443023	metab_332/metab_2667	419.167		metab_18729	417.155	metab_18729: 1.3638;
16	Lariciresinol	360.157	C20H24O6	332427	metab_637/metab_2734	361.164		metab_22614/metab_22335/metab_16758	359.15
17	methyl syrigin	402.152	C18H26O10
18	lanceolune A	206.058	C11H10O4	56964234	metab_205	207.065		metab_17820/metab_23869	205.05	metab_17820: 1.3273;
19	lanceolune B	220.074	C12H12O4	56964235	metab_5296/metab_5595/metab_13544	221.08	metab_5296: 1.2134;	metab_17480/metab_18287	219.066
20	lanceolune C	218.058	C12H10O4	56964356
Alkaloids and their glycosides
1	codotubulosine A	268.155	C14H22NO4+	25130789	metab_4052	269.16	metab_4052: 1.4865;	metab_23809	267.146	metab_23809: 1.9269;
2	codotubulosine B	352.176	C18H26NO6+	102508688				metab_17758	351.166
3	codonopyrrolidium A	350.197	C19H28NO5+	102333903				metab_23147	349.186
4	codonopsine	267.147	C14H21NO4	442631	metab_40/metab_13066	268.154
5	codonopsinine	237.137	C13H19NO3	10889945	metab_4777/metab_12434/metab_12514/metab_13702	238.143	metab_12514: 2.1034; metab_12434: 1.6419;
6	codonopsinol	283.142	C14H21NO5	44570118	metab_4376/metab_4706/metab_4860	284.149
7	choline	104.108	C5H14NO+	305	metab_3543	105.111
8	perlolyrine	264.09	C16H12N2O2	160179	metab_6039	265.097
9	1,2,3,4-tetrahydro-β-carboline-3-carboxylic acid	214.074	C12H10N2O2
10	adenosine	267.097	C10H13N5O4	60961				metab_23895	266.089	metab_23895: 1.5921;
11	hypoxanthine	136.038	C5H4N4O	135398638	metab_88/metab_14595	137.046	metab_88: 1.305;	metab_24200/metab_24013	135.03	metab_24200: 1.2346; metab_24013: 1.2297;
12	nicotine	162.116	C10H14N2	89594
13	5-hydroxy-2-hydroxymethylpyridine	125.048	C6H7NO2	419490				metab_17713/metab_24104	124.039
14	Codonopsinol C	239.116	C12H17NO4	72714647	metab_758/metab_833/metab_1045/metab_4282/metab_12140/metab_14615	240.123	metab_14615: 0.7318;	metab_23768/metab_18030/metab_22929	238.108	metab_23768: 0.7807;
15	Codonopiloside A	415.184	C19H29NO9	72714648	metab_1090	416.191		metab_16058/metab_22995	414.176	metab_16058: 0.8203; metab_22995: 0.7496;
16	Codonopsinol A	269.126	C13H19NO5	44570116	metab_975/metab_1104/metab_12456/metab_13025/metab_13520/metab_13754	270.133		metab_18056/metab_17874/metab_17601/metab_18010	268.119	metab_17874: 0.8023; metab_18010: 0.7896; metab_18056: 0.6899;
17	Codonopsinol B	253.131	C13H19NO4	44570115	metab_1103/metab_3090/metab_14942/metab_15395	254.138
18	uracil	112.027	C4H4N2O2	1174	metab_920/metab_15110/metab_15863	113.035		metab_17404/metab_24268	111.019
19	radicamine A	255.111	C12H17NO5	10083681	metab_224/metab_1004/metab_1315/metab_1346/metab_2965/metab_4086/metab_13767/metab_14567/metab_14573/metab_15411	256.117	metab_1346: 0.8256; metab_1315: 0.7851;	metab_23949/metab_17650	254.103
20	6-methoxy-4-formyl quinoline	187.063	C11H9NO2		metab_212/metab_1390/metab_5634/metab_11778/metab_12152	188.07	metab_12152: 1.3093; metab_1390: 1.2286;
21	6-methoxyquinoline-4-carbaldehyde	187.063	C11H9NO2	219312	metab_212/metab_1390/metab_5634/metab_11778/metab_12152	188.07	metab_12152: 1.3093; metab_1390: 1.2286;
22	N-9-formyl harman	210.079	C13H10N2O		metab_10361	211.086		metab_23170	209.071	metab_23170: 0.8321;
23	1-carbomethylcarboline	226.074	C13H10N2O2		metab_11373	227.081
24	norharman	168.069	C11H8N2	64961	metab_12674	169.076
25	Codonopsinol 1	283.142	C14H21NO5	44570118	metab_4376/metab_4706/metab_4860	284.149
26	Codonopsine 2	267.147	C14H21NO4	442631	metab_40/metab_13066	268.154		metab_23644/metab_16335	266.139	metab_16335: 0.5637;
27	5-hydroxy-2-pyridinemethanol	125.048	C6H7NO2	419490				metab_17713/metab_24104	124.039
28	codonocerebroside A	813.633	C46H87NO10
29	n-butyl allophanate	160.085	C6H12N2O3	5315565				metab_16856	159.077
Terpenoids and their glycosides
1	Atraetylenolide II	232.146	C15H20O2		metab_6955	233.153
2	Atraetylenolide III	248.141	C15H20O3		metab_595/metab_10027	249.148	metab_10027: 1.2773;	metab_21983	247.134
3	taraxerol	426.386	C30H50O	92097
4	taraxerone	424.371	C30H48O	92785	metab_120/metab_1998/metab_2127/metab_7633	425.377
5	taraxeryl acetate	468.397	C32H52O2	94225
6	taraxery acetate	452.402	C32H52O
7	β-amyrin acetate	468.397	C32H52O2	345510
8	Codonopilate A	718.626	C49H82O3	101792511
9	Codonopilate B	718.626	C49H82O3	101792512
10	Codonopilate C	716.611	C49H80O3	101792513
11	24-methytenecycloartanyllinolate	698.6	C49H78O2
12	24-methylenecycloartan-3-ol	440.402	C31H52O	544165
13	friedelan-3-one	426.386	C30H50O	91472
14	1-friedelan-3-one	440.402	C31H52O
15	24-methylenecycloartanol	440.402	C31H52O	94204
16	friedelin	426.386	C30H50O	91472
17	oleanolic acid	456.36	C30H48O3	10494				metab_20401/metab_19996/metab_20753/metab_19268/metab_21359/metab_20851/metab_21055	455.353	metab_20401: 1.4766; metab_19268: 1.2736; metab_19996: 1.2396; metab_20851: 1.2271;
18	echinocystic acid	472.355	C30H48O4	73309	metab_409/metab_452/metab_7630/metab_8608/metab_8996	473.362	metab_8608: 1.6968; metab_7630: 1.5133;	metab_21966/metab_20646/metab_21751/metab_16471	471.347	metab_20646: 1.3677; metab_21966: 1.3673; metab_21751: 1.2786;
19	bis(2-ethylhexyl) phthalate	390.277	C24H38O4	8343	metab_8563	391.284
20	5-methoxymethyl-2-furaldehyde	140.047	C7H8O3	74711	metab_14067	141.054		metab_19264/metab_23975	139.039
21	5-hydroxyl-2-furaldehyde	112.016	C5H4O3		metab_3409	113.023		metab_16901	111.008
22	8β-hydroxyasterolid	248.141	C15H20O3	196319	metab_595/metab_10027	249.148	metab_10027: 1.2773;	metab_21983	247.134
23	5-hydroxymethyl-2-furaldehyde	126.032	C6H6O3	237332	metab_3202	127.039		metab_17179	125.023
24	acid-3-β-D-glucopyranosyl methyl furfural	662.403	C37H58O10
25	Lancemaside A	1190.57	C57H90O26	71522140
26	Lancemaside B	1352.62	C63H100O31	102278364
27	Lancemaside C	1220.58	C58H92O27	101841537
28	Lancemaside D	1088.54	C53H84O23	101841538
29	Lancemaside E	1352.62	C63H100O31	102278365
30	Lancemaside F	1514.68	C69H110O36	102278366
31	Lancemaside G	1206.57	C57H90O27	101841539
32	Foetidissimoside A	1058.53	C52H82O22	20055980
33	aster saponin Hb	926.487	C47H74O18	102412782
34	codonoposide	1176.59	C57H92O25	101189857
35	codonolaside	1014.54	C57H90O26
36	codonolaside I	1204.59	C58H92O26
37	codonolaside II	1014.54	C51H82O20
38	codonolaside III	1352.62	C63H100O31
39	codonolaside IV
40	codonolaside V
41	echinocystic acid-3-O-(6′-O-methyl)-β-D-glucuronopyranoside
42	atraetylenolide	248.141	C15H20O3		metab_595/metab_10027	249.148	metab_10027: 1.2773;	metab_21983	247.134
43	albigenic acid	472.355	C30H48O4	131752020	metab_409/metab_452/metab_7630/metab_8608/metab_8996	473.362	metab_8608: 1.6968; metab_7630: 1.5133;	metab_21966/metab_20646/metab_21751/metab_16471	471.347	metab_20646: 1.3677; metab_21966: 1.3673; metab_21751: 1.2786;
44	cycloartenol	426.386	C30H50O	92110
45	rubiprasin	516.381	C32H52O5	14395581	metab_2231	517.389	metab_2231: 1.3124;	metab_20007/metab_20333/metab_20727/metab_16436	515.374	metab_16436: 1.6669; metab_20333: 1.3587;
46	lupeol	426.386	C30H50O	259846
47	hopane-6α,22-diol	444.397	C30H52O2	159931				metab_21195/metab_16586	443.389	metab_21195: 1.5354;
48	3β-acetoxyoleanan-12-one	484.392	C32H52O3	101992961
Steroids and their glycosides
1	α-spinasterol	412.37	C29H48O	5315190
2	α-spinatsrol-β-D-glucoside	574.423	C35H58O6					metab_16603	573.416
3	α-spinasta-7,22-diene-3-one	411.363	C29H47O
4	Δ7-stigmasterol	410.355	C29H46O	20843308	metab_1986/metab_2080	411.361	metab_1986: 1.2006;	metab_20790/metab_20411/metab_16056/metab_21084	409.347	metab_20411: 1.9395; metab_16056: 1.4312; metab_21084: 1.2499;
5	Δ7-stigmasteryl glucoside	572.408	C35H56O6					metab_20693/metab_22287/metab_20288	571.4	metab_20693: 0.7806;
6	Δ7-stigmasta-7-ene-3-one	408.339	C29H44O		metab_7751/metab_9051	409.346	metab_9051: 1.2518; metab_7751: 1.2411;	metab_20793/metab_20111/metab_21241/metab_20355/metab_20241	407.331	metab_20793: 2.0324; metab_20355: 1.9006; metab_20241: 1.6483; metab_20111: 1.2361;
7	Δ5,22-stigmasterol	456.36	C30H48O3		metab_7535/metab_7759/metab_8715	457.367	metab_7759: 1.2957;	metab_20401/metab_19996/metab_20753/metab_19268/metab_21359/metab_20851/metab_21055	455.353	metab_20401: 1.4766; metab_19268: 1.2736; metab_19996: 1.2396; metab_20851: 1.2271;
8	Δ5,22-stigmasteryl-β-D-glucoside	574.423	C35H58O6					metab_16603	573.416
9	stigmasta-5,22-dien-3-ol	412.37	C29H48O	6432745
10	stigmast-7-en-3-one	412.37	C29H48O	5748344
11	stigmast-7,22-dien-3-ol	410.355	C29H46O	91049307	metab_1986/metab_2080	411.361	metab_1986: 1.2006;	metab_20790/metab_20411/metab_16056/metab_21084	409.347	metab_20411: 1.9395; metab_16056: 1.4312; metab_21084: 1.2499;
12	Δ5,25-stigmasterol	574.423	C35H58O6					metab_16603	573.416
13	β-sitosterol	414.386	C29H50O	222284
14	β-daucosterol	576.439	C35H60O6	5742590				metab_21103	575.434
15	sitosterol	414.386	C29H50O	222284
Organic acids and their glycosides
1	lauric acid	200.178	C12H24O2	3893				metab_21476/metab_22226/metab_19308	199.17	metab_21476: 1.3585;
2	9,10,13-trihydroxy-(E)-11-octadecenoic acid	330.241	C18H34O5					metab_22632	329.233
3	2,4-nonadlenic acid	166.099	C10H14O2		metab_1230/metab_1478/metab_6441	167.106	metab_1230: 1.2515;	metab_22740/metab_22350	165.091	metab_22740: 1.5;
4	5,6,9-trihydroxy-octadec-7-enoic acid	330.241	C18H34O5					metab_22632	329.233
5	9,12,13-trihydroxy-10,15-octadecadienoic acid	328.225	C18H32O5	5312876	metab_396/metab_11414	329.232		metab_22633	327.217
6	9,12,13-trihydroxy-10-octadecenoic acid	330.241	C18H34O5	5282966				metab_22632	329.233
7	9,10-dyhydroxy-12-octadecenoic acid	314.246	C18H34O4					metab_20962/metab_16033/metab_20209/metab_20215	313.238
8	9-hydroxy-10,12-octadecadienoic acid	296.235	C18H32O3	1927	metab_430	297.242		metab_16673/metab_20268/metab_20380	295.227
9	stearic acid	284.272	C18H36O2	5281				metab_19348	283.264
10	coronaric acid	296.235	C18H32O3	6246154	metab_430	297.242
11	succinic acid	118.027	C4H6O4	1110				metab_16094	117.018
12	maleic acid	116.011	C4H4O4	444266				metab_17234/metab_24181/metab_17306	115.003
13	codopiloic acid	127.027	C5H5NO3	178371	metab_14976	128.034
14	fumalic acid	194.058	C10H10O4	445858	metab_1290/metab_5269/metab_5503/metab_13259	195.065		metab_23643/metab_23687/metab_23780/metab_23588/metab_23132/metab_17456/metab_23968/metab_23530/metab_23823	193.05
15	nicotinic acid	123.032	C6H5NO2	938	metab_3858/metab_3858	124.039		metab_17332	122.024
16	caffeic acid	180.042	C9H8O4	689043	metab_3821/metab_5102/metab_6148/metab_10908/metab_12643/metab_16008	181.049	metab_10908: 1.3369; metab_12643: 1.2293; metab_6148: 1.2265;	metab_19396	179.038
17	2-furancarboxylic acid	112.016	C5H4O3	6919	metab_3409	113.023		metab_16901	111.008
18	(Z)-2-(b-glucopyranosyloxy)-3-phenylpropenoic acid	326.1	C15H18O8	102253470				metab_16045/metab_23481/metab_23859/metab_23816/metab_23366/metab_23243/metab_17759/metab_23453/metab_18418	325.092
19	shikimic acid	174.053	C7H10O5	8742
20	chlorogenic acid	354.095	C16H18O9	1794427	metab_22/metab_5893	355.102	metab_5893: 1.8188;	metab_23996	353.087
21	neochlorogenic acid	354.095	C16H18O9	5280633	metab_22/metab_5893	355.102	metab_5893: 1.8188;	metab_23996	353.087
22	3-O-Caffeoylquinic acid	354.095	C16H18O9	1794427	metab_22/metab_5893	355.102	metab_5893: 1.8188;	metab_23996	353.087
23	8-O-4′diferulic acid	386.1	C20H18O8	5281770				metab_23185	385.092	metab_23185: 1.3311;
24	p-coumaric acid glucoside	326.1	C15H18O8	9840292				metab_16045/metab_23481/metab_23859/metab_23816/metab_23366/metab_23243/metab_17759/metab_23453/metab_18418	325.092
25	syringic acid	198.053	C9H10O5	10742	metab_214/metab_3200/metab_11451/metab_14616/metab_15076	199.06	metab_14616: 0.7686; metab_11451: 0.7366;
26	vanillic acid	168.042	C8H8O4	8468	metab_1329/metab_6048/metab_12055/metab_13469/metab_13910	169.049
27	4-(β-D-glucopyranosyl)-benzoic acid	284.09	C13H16O7	129844426	metab_5237	285.096		metab_17096	283.081
28	4-hydroxy benzoic acid	138.032	C7H6O3	135	metab_947/metab_1129/metab_5209/metab_15230	139.039		metab_24768/metab_17737/metab_16858/metab_23864/metab_18743	137.023
others
1	(E)-2-hexenyl-α-L-arabinopyranosyl-(1→6)-β-D-glucopyranoside
2	hexenyl-β-sophoroside	436.231	C20H36O10					metab_18194/metab_18321	435.223
3	hexyl-β-gentiobioside	440.226	C19H36O11					metab_22832/metab_22482	439.218	metab_22482: 0.7943;
4	ethyl-β-D-glucopyranoside	208.095	C8H16O6	11127487				metab_24127	207.087
5	n-hexyl-β-D-glucopyranoside	264.157	C12H24O6		metab_12195/metab_12264	265.164	metab_12195: 0.6538; metab_12264: 0.5561;	metab_20134/metab_16701/metab_20910/metab_21034	263.15
6	hexyl-β-D-fructofuranoside	278.173	C13H26O6
7	geniposide	388.137	C17H24O10	107848
8	n-butyl-β-D-fructofuranoside	236.126	C10H20O6	13386213	metab_13180	237.134	metab_13180: 0.577;	metab_22726/metab_16790	233.118
9	n-butyl-α-D-fructofuranoside	236.126	C10H20O6	13386213	metab_13180	237.134	metab_13180: 0.577;	metab_22726/metab_16790	233.118
10	ethyl-α-D-fructofuranoside	208.095	C8H16O6	133590				metab_24127	207.087
11	(Z)-3-hexenyl-β-D-sophoroside	436.231	C20H36O10					metab_18194/metab_18321	435.223
12	(E)-2-hexenyl-β-D-sophoroside	436.231	C20H36O10					metab_18194/metab_18321	435.223
13	(E)-2-hexenyl-β-D-glucopyranoside	262.142	C12H22O6					metab_18101/metab_23461/metab_17432/metab_18687/metab_23032	261.134	metab_23461: 1.6642; metab_18101: 1.314;
14	hexyl-α-D-fructofuranoside	276.157	C13H24O6					metab_23036	275.15	metab_23036: 1.5241;
15	ethyl-β-D-fructofuranoside	208.095	C8H16O6	138113708				metab_24127	207.087
16	(E)-2-hexenyl-β-sophoroside	436.231	C20H36O10					metab_18194/metab_18321	435.223
17	ethyl-α-D-glucopyranoside	208.095	C8H16O6	138113708				metab_24127	207.087
18	(E)-2-hexenyl-β-D-glucopyranosyl-(1→2)-β-D-glucopyranoside	424.194	C18H32O11	102034264				metab_17935/metab_23444/metab_22794	423.187	metab_22794: 0.7567;
19	(E)-2-hexenyl-α-L-arabinopyranosyl-(1→2)-β-D-glucopyranoside	394.184	C17H30O10	101852026
20	hexyl-β-D-glucopyranosyl-(1→2)-β-D-glucopyranoside	426.21	C18H34O11	14655096	metab_12181	427.217		metab_16066	425.202	metab_16066: 0.7336;
21	hexyl-β-D-glucopyranosyl-(1→6)-β-D-glucopyranoside	426.21	C18H34O11	14655094	metab_12181	427.217		metab_16066	425.202	metab_16066: 0.7336;
22	Eucommioside II	350.158	C15H26O9	6325167				metab_17970/metab_17884	349.15
23	stigmasetyl-β-D-glucoside
24	(Z)-3-hexenyl-β-D-glucopyranoside	262.142	C12H22O6	5318046				metab_18101/metab_23461/metab_17432/metab_18687/metab_23032	261.134	metab_23461: 1.6642; metab_18101: 1.314;
25	(6R,9S)-3-oxo-α-ionol-β-D-glucopyranoside	382.199	C20H30O7					metab_22733	381.191	metab_22733: 14.732;
26	sweroside	358.126	C16H22O9	161036				metab_16181/metab_16187/metab_17571/metab_17915	357.119	metab_16181: 0.802;
27	syringaldehyde	182.058	C9H10O4	8655	metab_1174/metab_5263/metab_13759/metab_14420/metab_14599	183.065		metab_22361/metab_17680/metab_18631/metab_23584/metab_24018/metab_24108/metab_18183	181.05	metab_22361: 1.2388;
28	o-(o-methoxyphenoxy)phenol	216.079	C13H12O3	572803	metab_603/metab_1531/metab_2914/metab_6618/metab_10453/metab_11552/metab_11617/metab_13135	217.09	metab_11552: 1.4509; metab_1531: 1.388; metab_6618: 1.3423; metab_10453: 1.2732;
29	6-methylgingediol	310.214	C18H30O4	5319663	metab_578/metab_2411/metab_2553	311.221		metab_22506/metab_19422/metab_19555	309.207
30	genipin gentiobioside	550.19	C23H34O15	3082301
31	2-furancarboxylate	111.008	C5H3O3-	5460151
32	woodorien	330.095	C14H18O9	49824629				metab_24214/metab_24316/metab_23912/metab_17149/metab_23847	329.087	metab_23912: 1.259; metab_24214: 0.7824;
33	tianshi acid
34	bis-(2-ethylhexyl)-phthalate	390.277	C24H38O4	8343	metab_8563	391.284
35	2-furan sodium salt	133.998	C5H3NaO3	19205589				metab_24786	132.985
36	emodin	270.053	C15H10O5	3220	metab_2861/metab_6124/metab_6554/metab_12114	271.06	metab_6554: 1.5465; metab_2861: 1.4605; metab_12114: 1.2428; metab_6124: 1.6322;	metab_22669/metab_18355	269.045	metab_22669: 1.7432; metab_18355: 1.4388;
37	methylpalmatate	268.277	C18H36O
38	3(S)-mevalonolacton
39	1,3-linolein-2-olein	880.752	C57H100O6	132939703
40	dibutyl terephthalate	278.152	C16H22O4	16066	metab_675	279.159		metab_18746	277.144	metab_18746: 1.2987;
41	1,6-hexanediol-3,4-bis(4-hydroxy-3-methoxyphenyl)	362.173	C20H26O6	101852025	metab_2836/metab_11473	363.18		metab_23184/metab_18473/metab_18330/metab_18674	361.165	metab_23184: 0.8062; metab_18473: 0.7851;
42	p-hydroxy benzaldehyde	122.037	C7H6O2	126	metab_4151/metab_12469	123.044		metab_18789/metab_24126/metab_16184	121.029
43	vanillin	152.047	C8H8O3	1183	metab_2882	153.054		metab_17410/metab_18426/metab_23766	151.039
44	3-O-Caffeoylquinic acid methyl ester	368.111	C17H20O9	6476139	metab_12427	369.118		metab_23651/metab_17651/metab_18320/metab_17683/metab_23961/metab_24585/metab_24364/metab_24331	367.103	metab_24331: 0.5975;
45	3-O-Caffeoylquinic acid butyl ester	410.158	C20H26O9	12135130	metab_1305	411.162		metab_23155/metab_23592/metab_17852/metab_23283/metab_23721	409.15	metab_23283: 1.321;
